# Supplementary material for: Understanding the Modus Operandi of MicroRNA Regulatory Clusters
Source: Cells. 2019 Sep 18;8(9):1103. doi: 10.3390/cells8091103 (PMC6770051; doi:10.3390/cells8091103)

Supplementary Figure S1. Summary of the workflow.

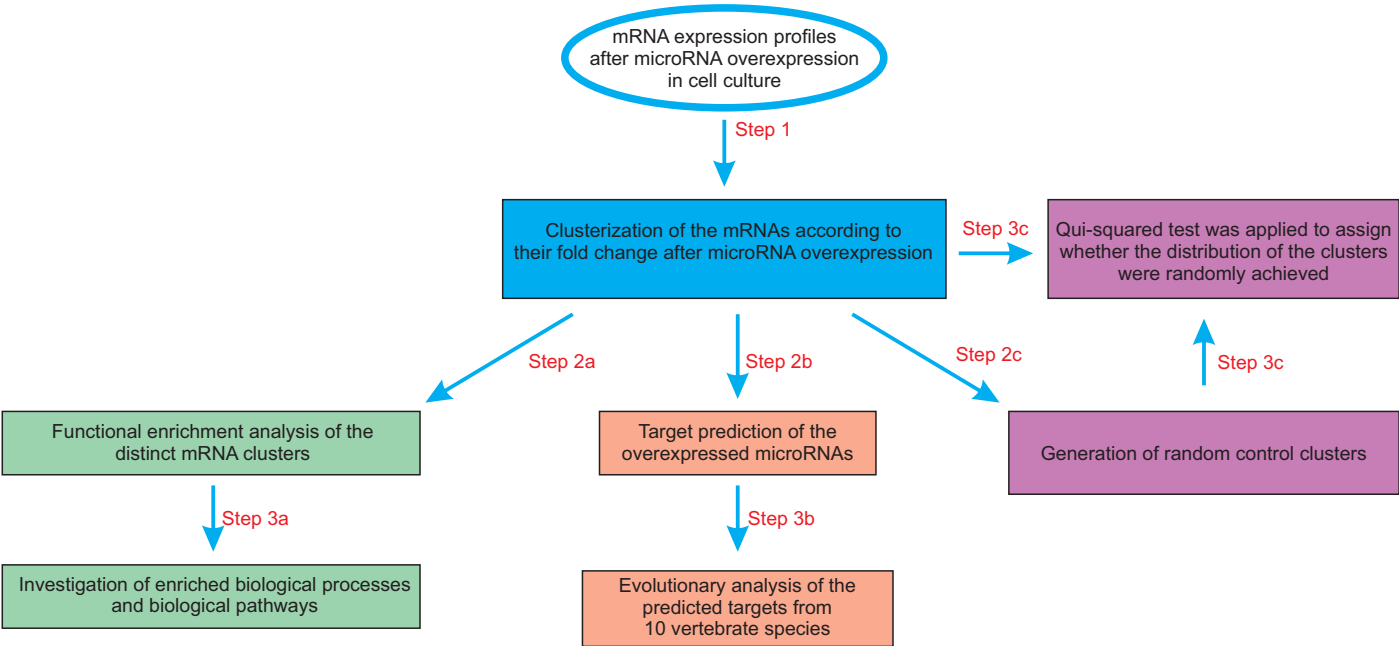

**Supplementary Figure S2.** Number of clusters identified for the 10 miRNAs analyzed. For each miRNA, mRNAs with similar fold changes (log2) were clustered together using the software Weka (v3.8; Frank et al., 2016) by the k-means method. Nine clusters were tested (from two to ten) and the best cluster number for each array were identified with the elbow curve method, using a python algorithm developed by Sapota et al. (2011).

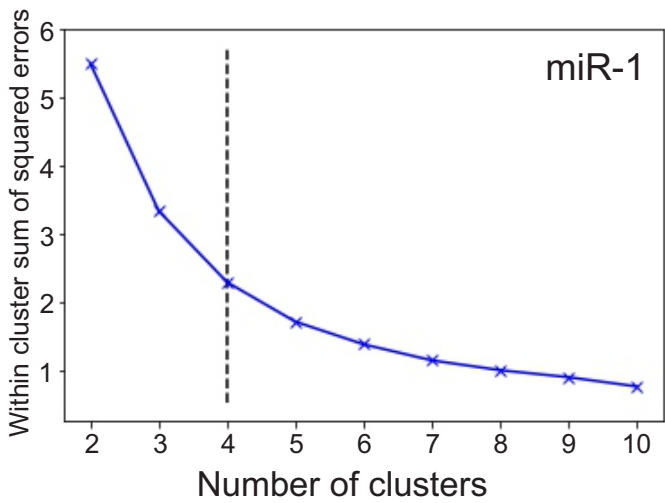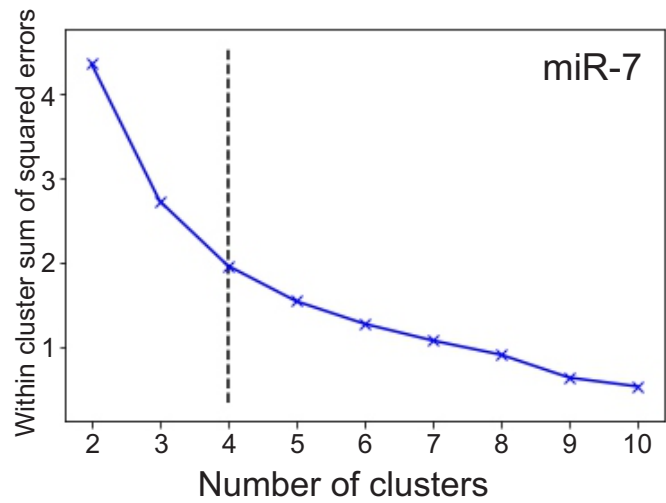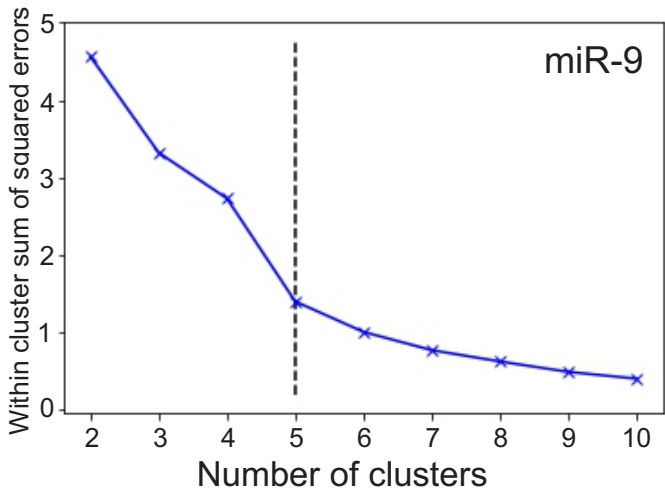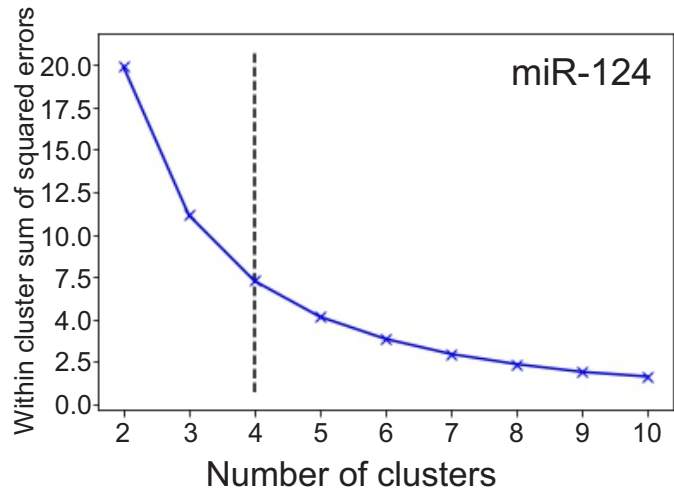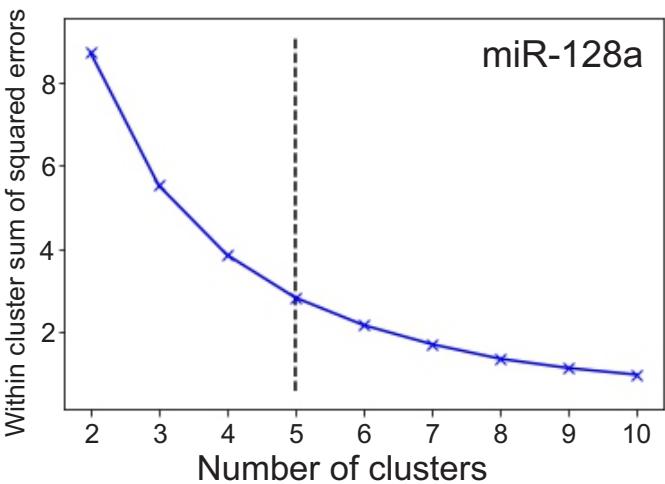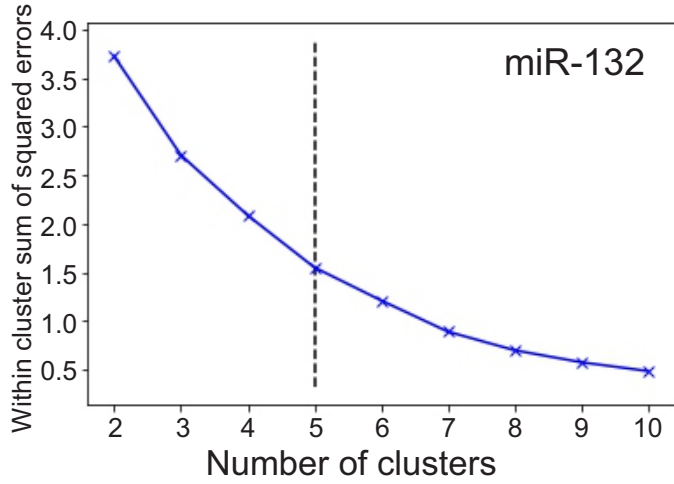

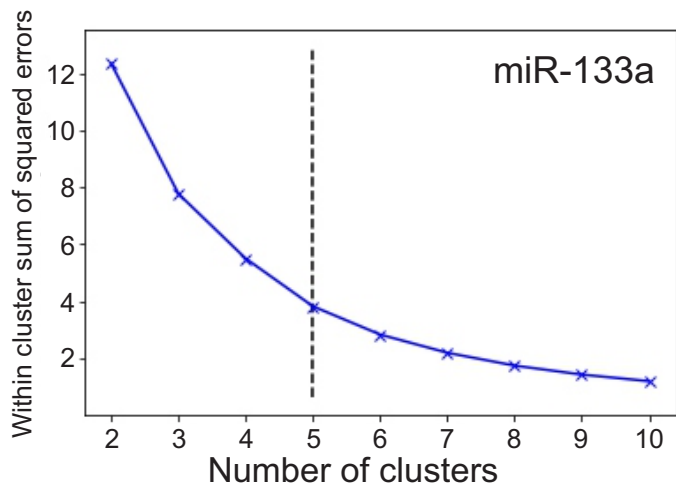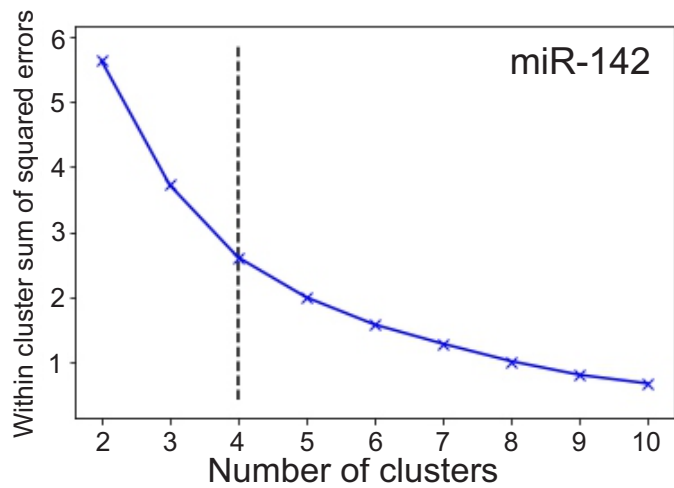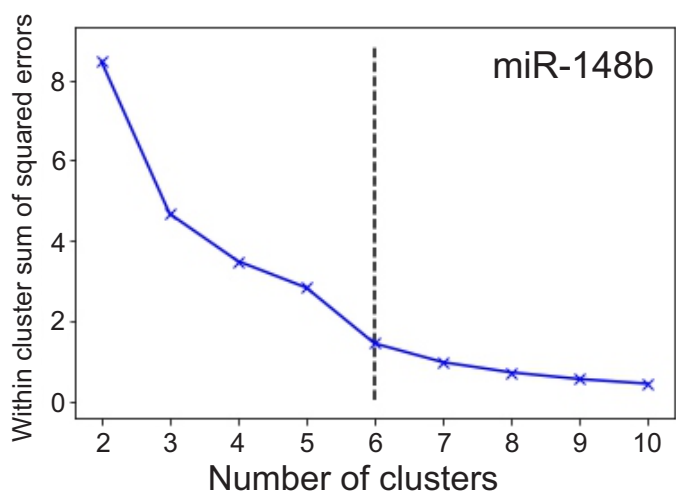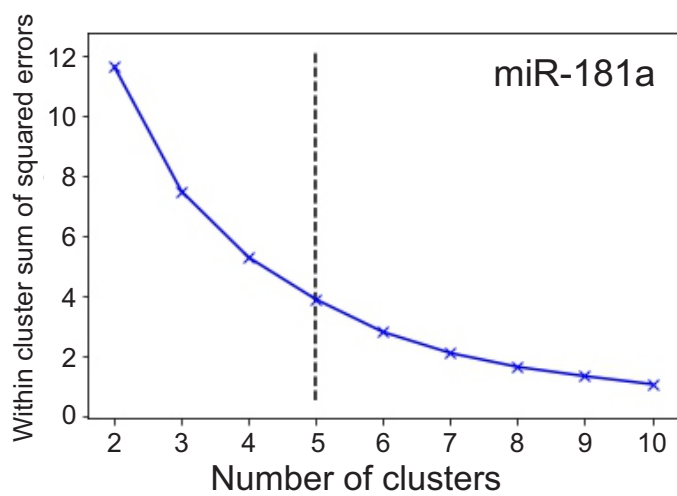

**Supplementary Figure S3.** Correlation between the number of enriched terms and perturbed targets of the random sets of the 10 miRNAs analyzed. The average number of terms of the three random sets were used. Clusters are ordered by the number of gene members.

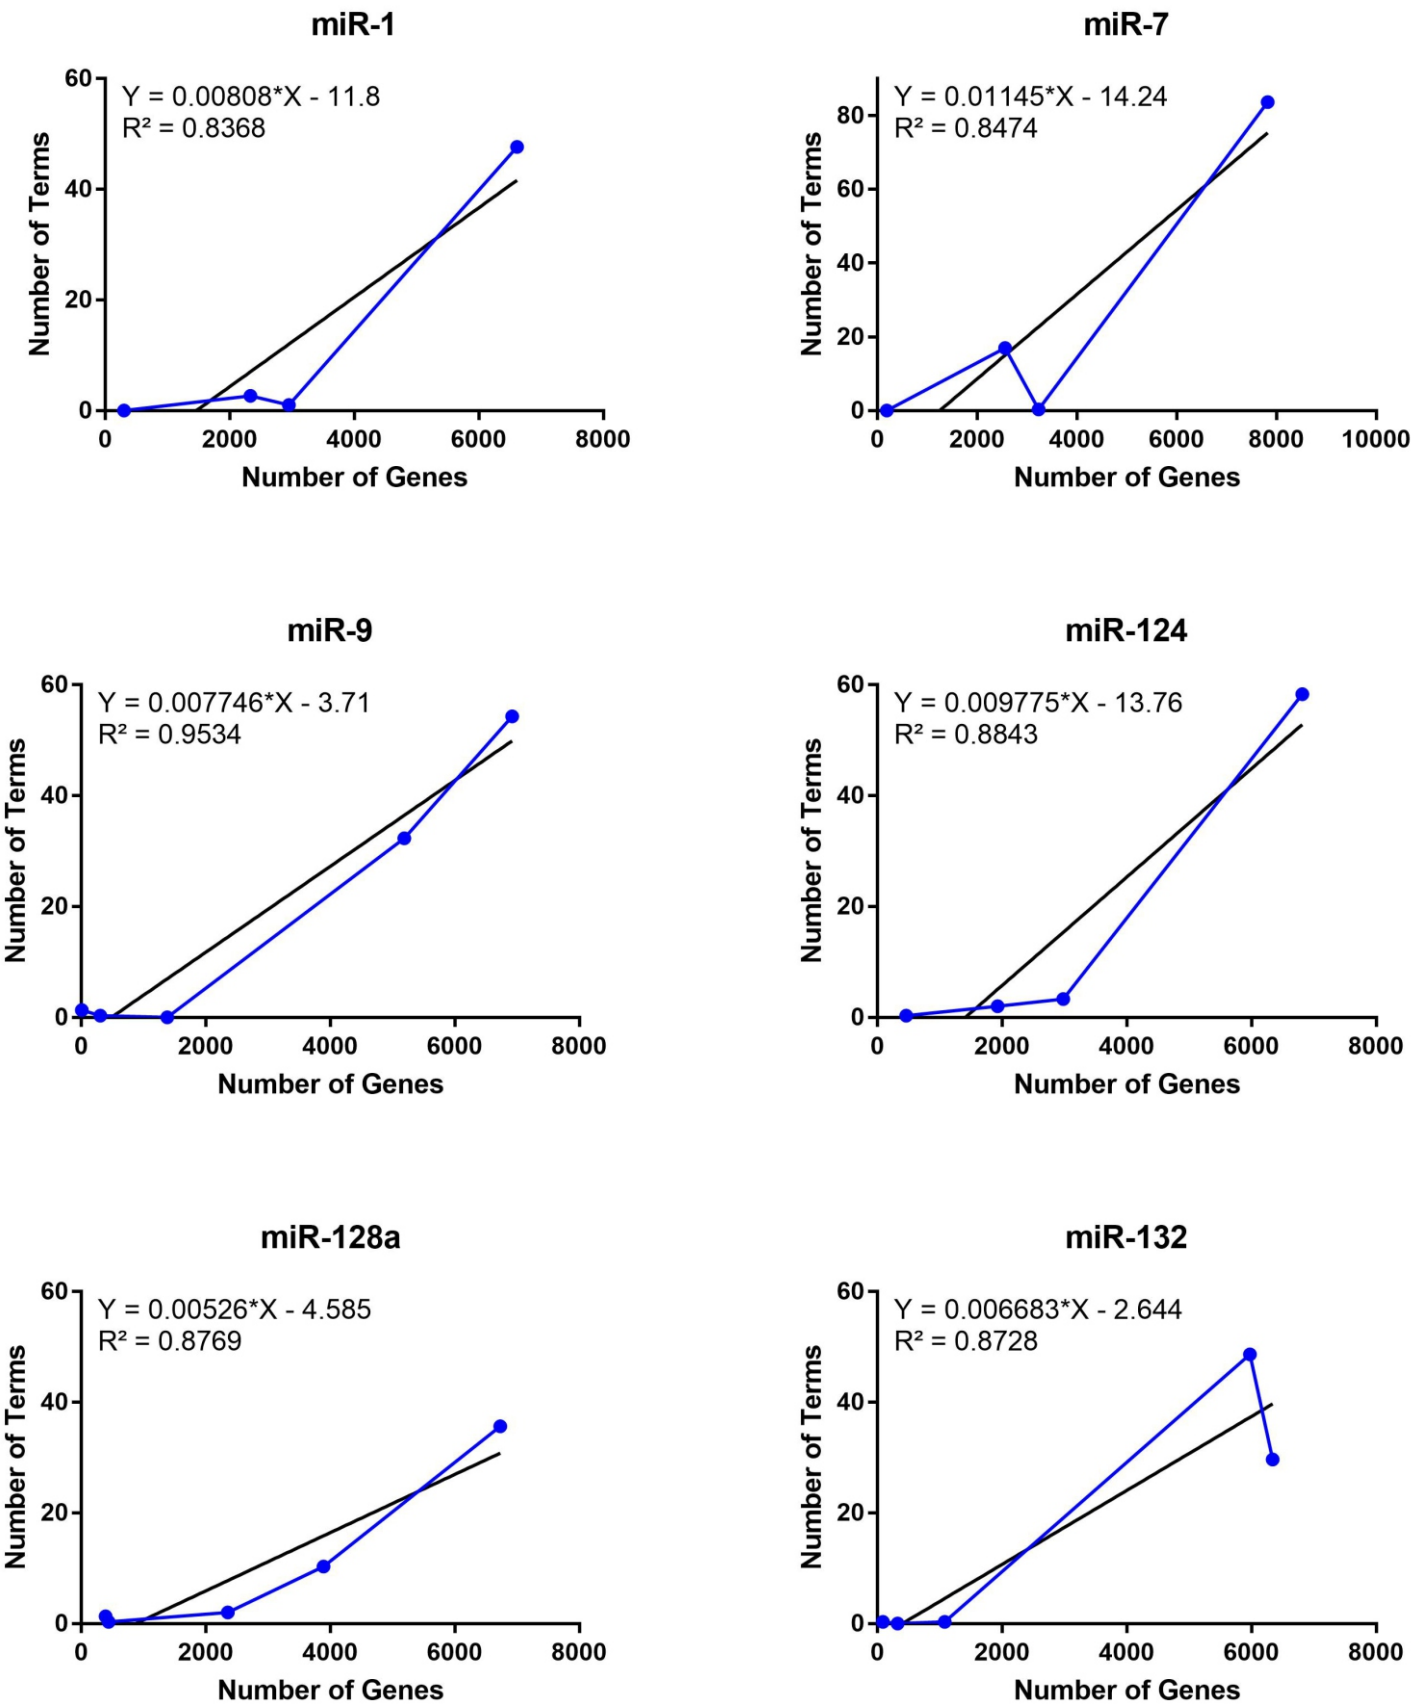

miR-133a

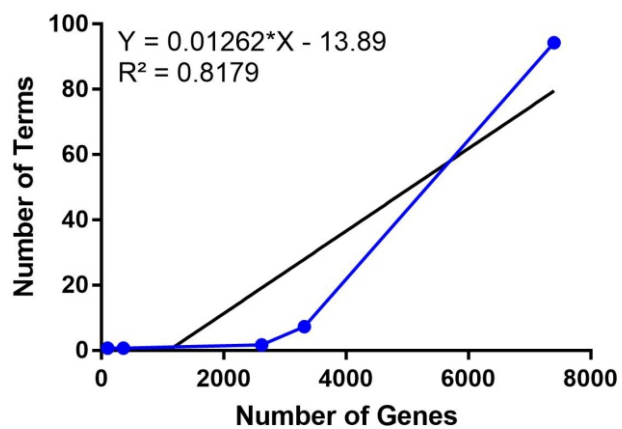

miR-142

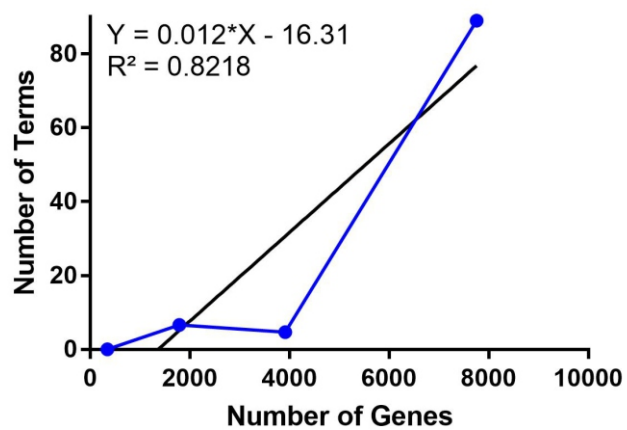

miR-148b

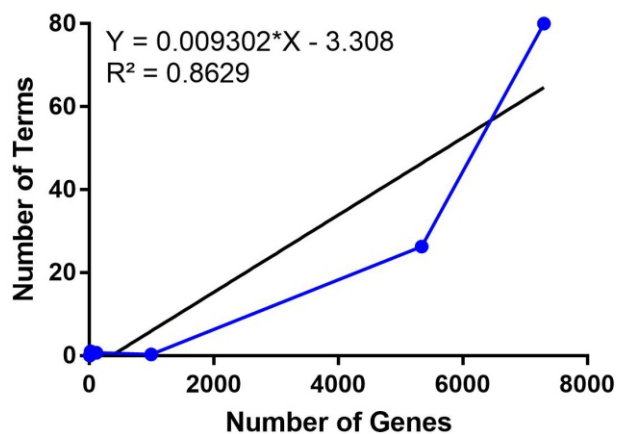

miR-181a

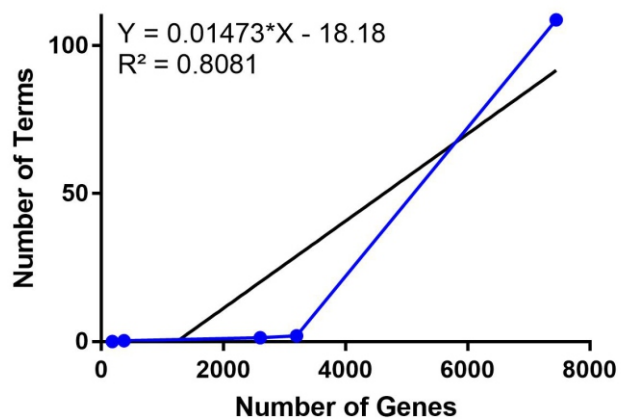

**Supplementary Figure S4.** Semantic similarity of the enriched GO terms of mRNA clusters after transfection of the 10 miRNAs. Each term enriched in the same miRNA cluster is identified by the same color. Enriched GO terms were identified by ToppCluster and summarized by REVIGO to eliminate redundant terms. The numbers within the brackets represent the minimum and maximum fold change values of each cluster. Terms with different colors in a cluster indicate that the same term is also present in the cluster of that color. Grey edges connect highly similar terms, with edge width indicating similarity degree. The name of the enriched terms of each cluster identified by ToppCluster can be found at Supplementary Table S3.

## miR-1

Cluster [-0.092:0.164]

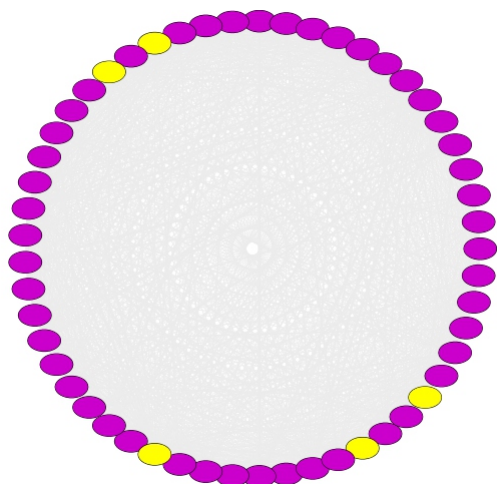

Cluster [-0.531:-0.093]

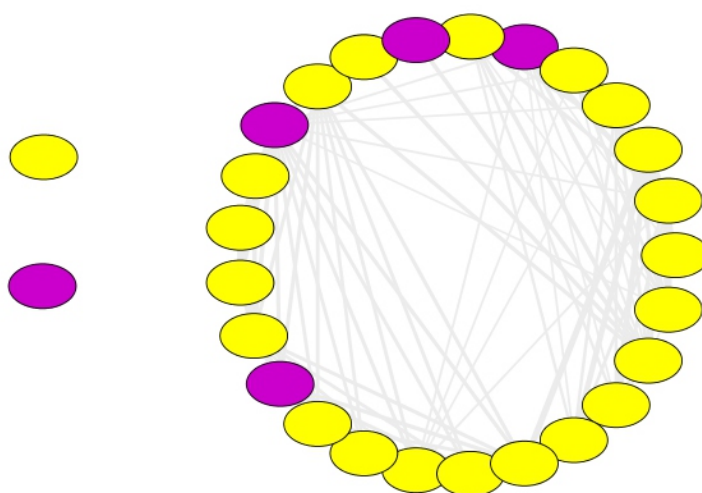

Cluster [0.165:2.011]

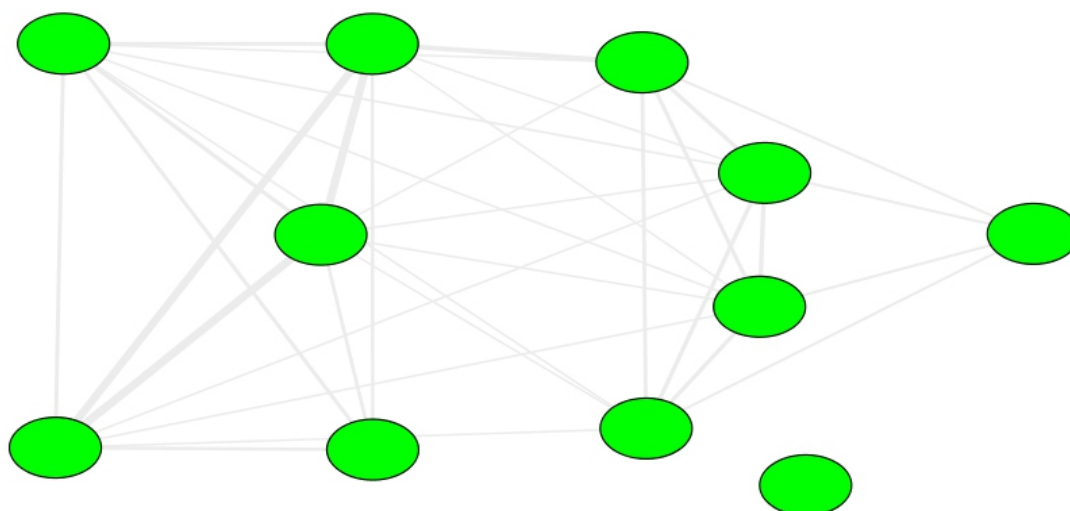

miR-7

Cluster [0.088:3.330]

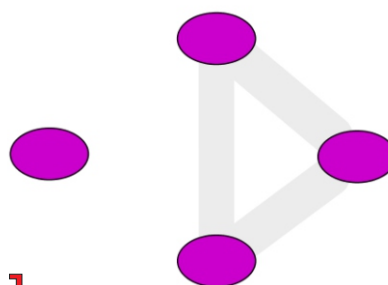

Cluster [-0.465:-0.084]

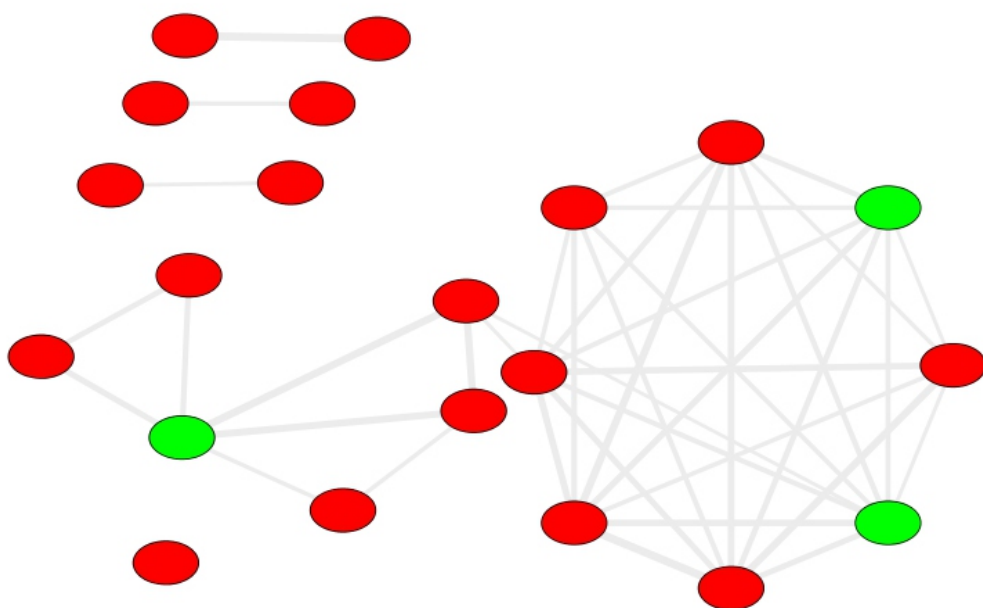

Cluster [-0.083:0.087]

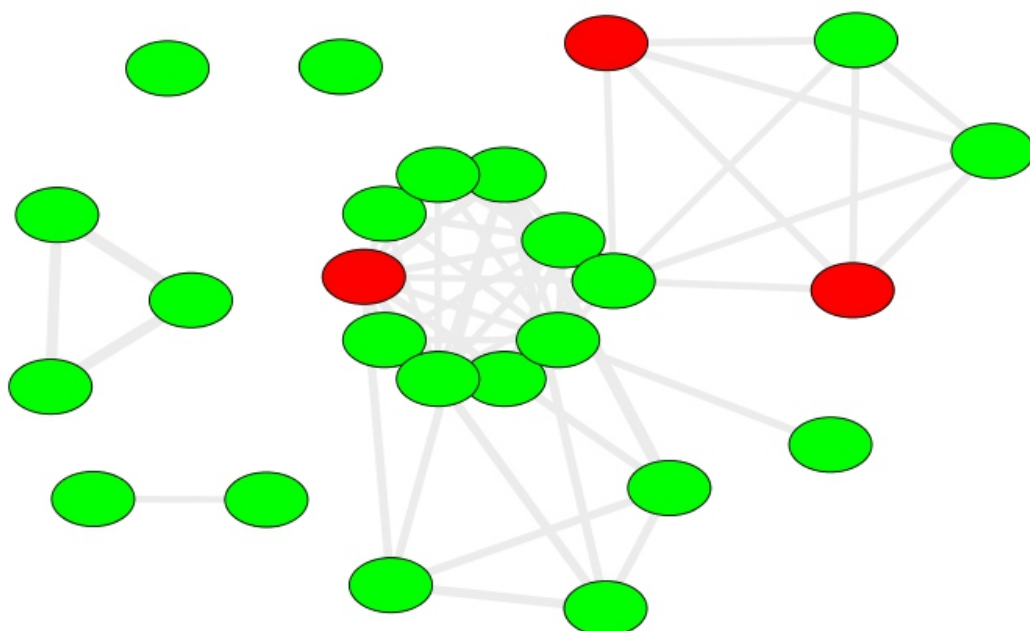

miR-9

Cluster [0.405:3.413]

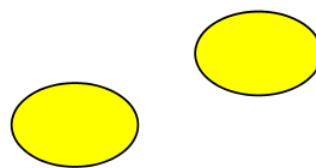

Cluster [-2.232:-0.233]

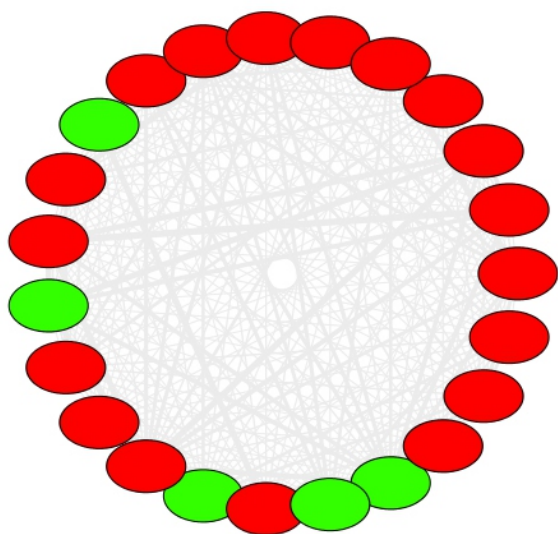

Cluster [-0.232:0.046]

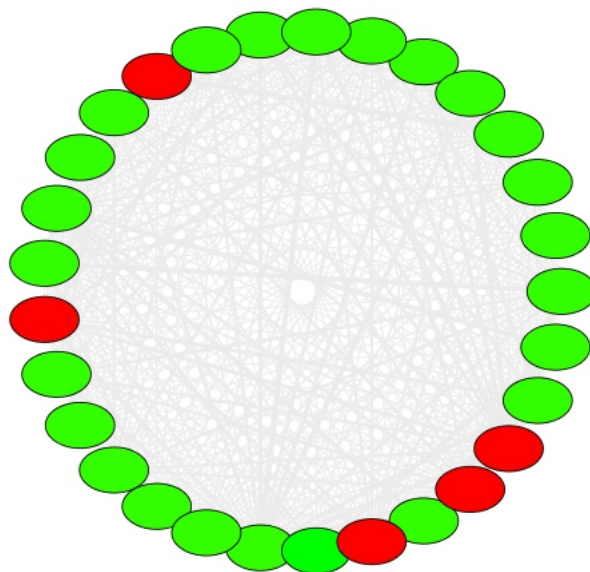

Cluster [0.047:0.402]

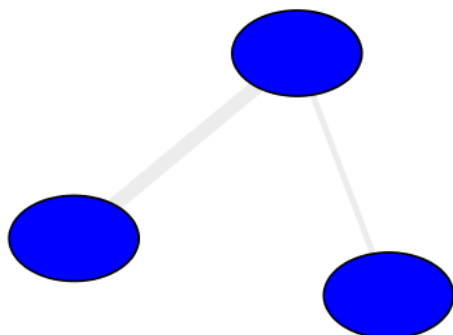

miR-124

Cluster [-2.608:-0.58]

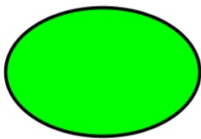

Cluster [-0.09:0.224]

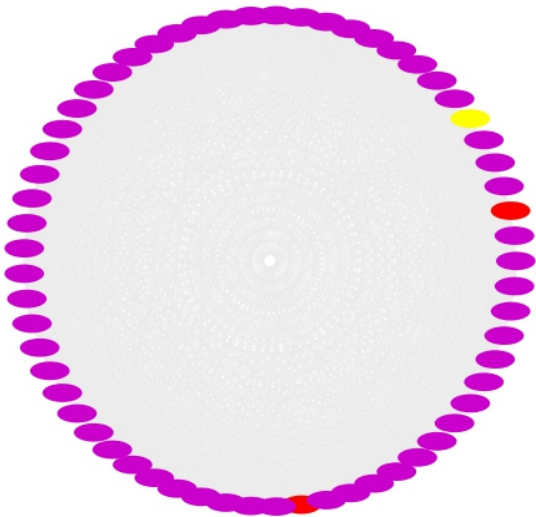

Cluster [-0.576:-0.091]

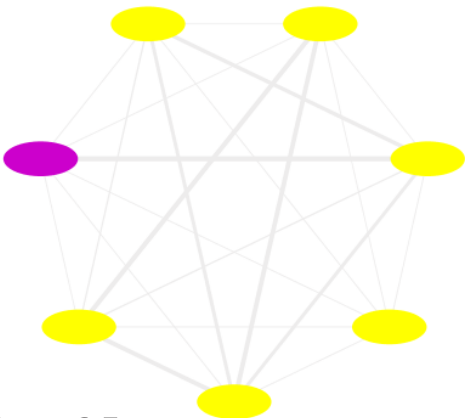

Cluster [0.225:2.79]

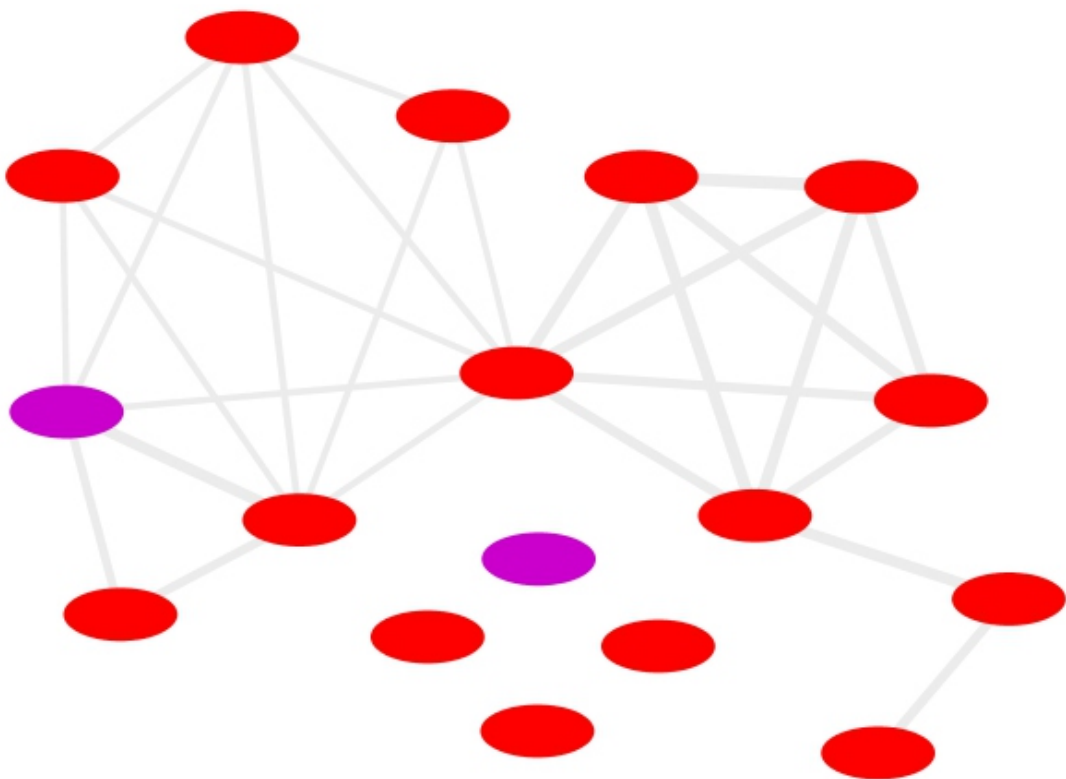

miR-128a

Cluster [0.34:3.676]

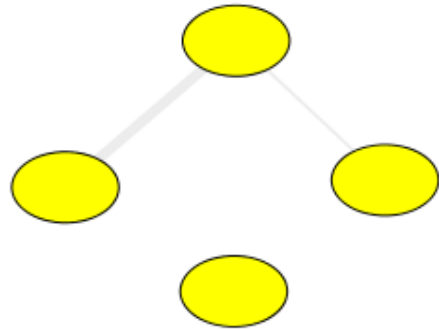

Cluster [-0.413:-0.106]

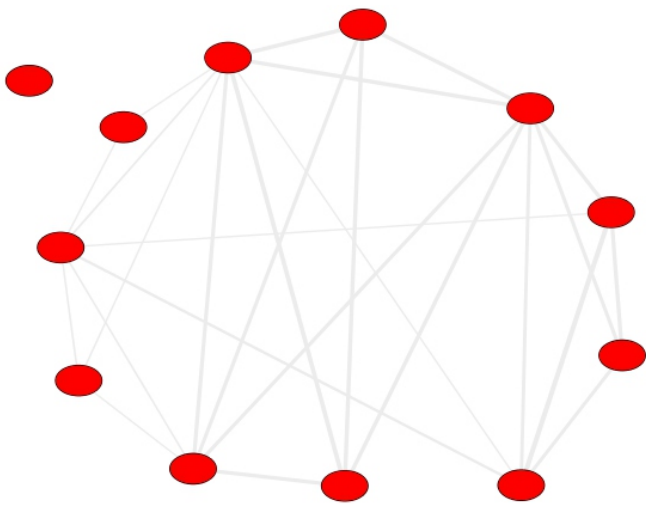

Cluster [-0.105:0.072]

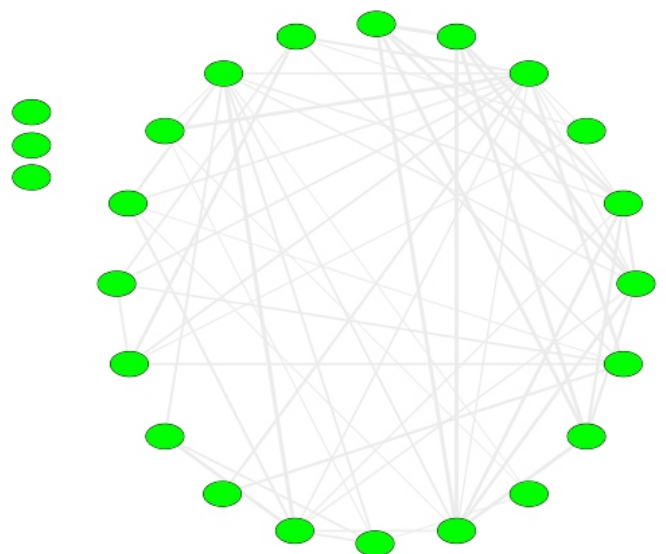

Cluster [0.073:0.339]

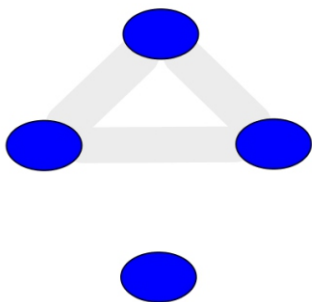

miR-132

Cluster [0.324:6.658]

Cluster [-0.833:-0.214]

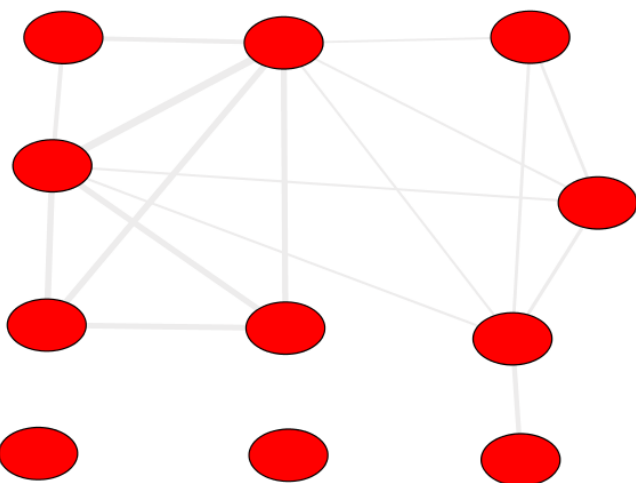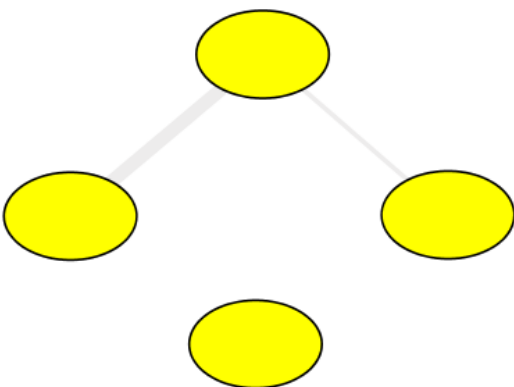

Cluster [-0.213:0.024]

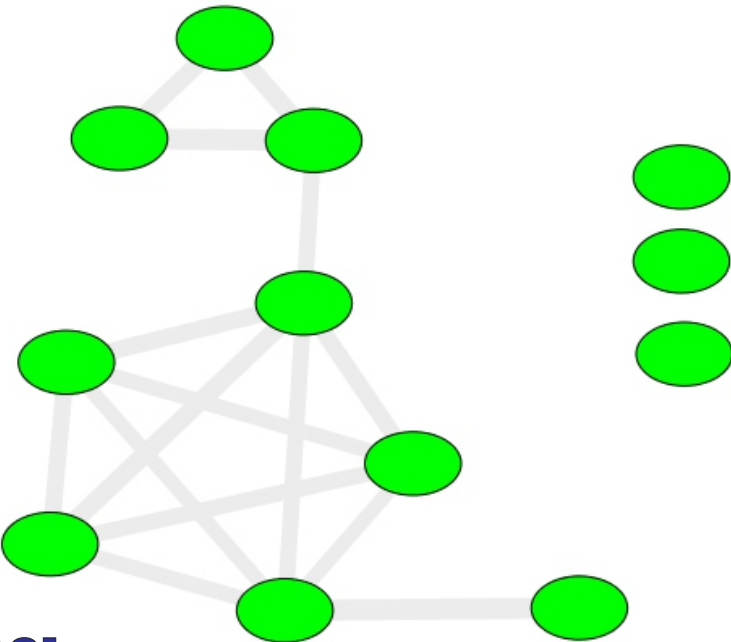

Cluster [0.025:0.322]

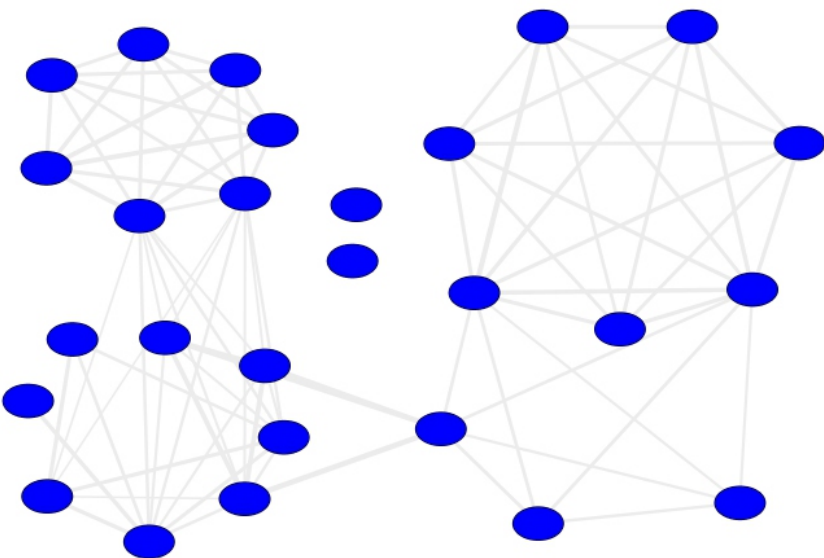

miR-133a

Cluster [-2.156:-0.542]

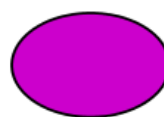

Cluster [0.674:4.128]

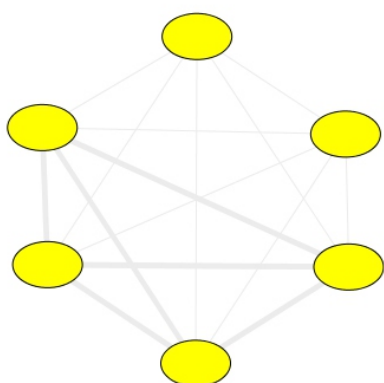

Cluster [0.12:0.666]

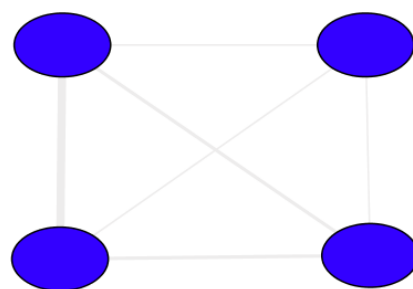

Cluster [-0.539:-0.119]

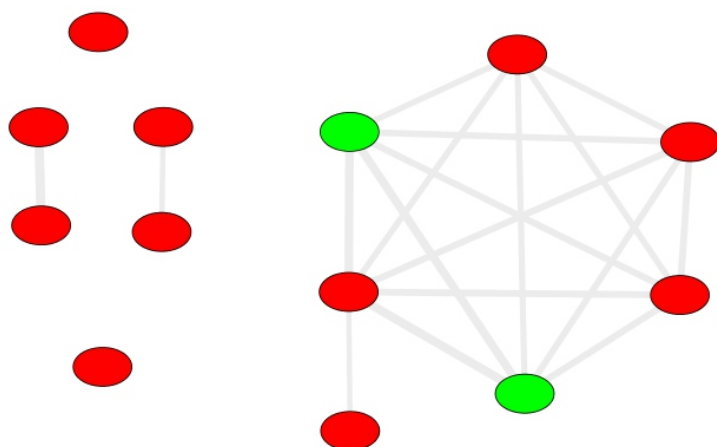

Cluster [-0.118:0.119]

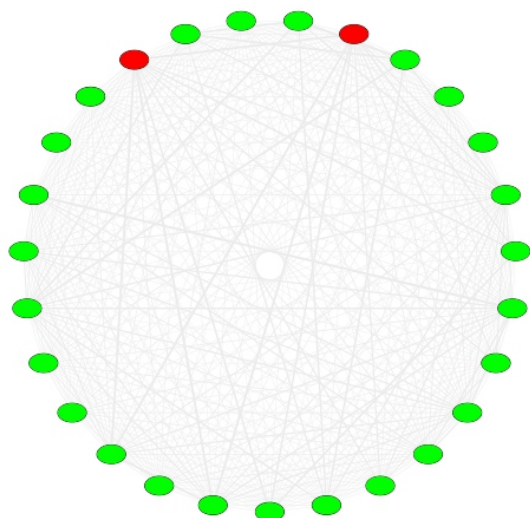

miR-142

Cluster [-3.89:-0.346]

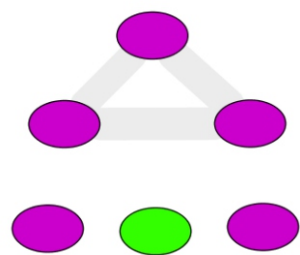

Cluster [0.134:2.367]

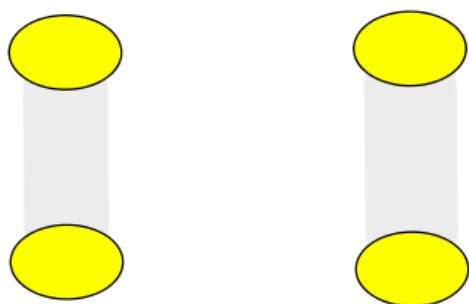

Cluster [-0.045:0.133]

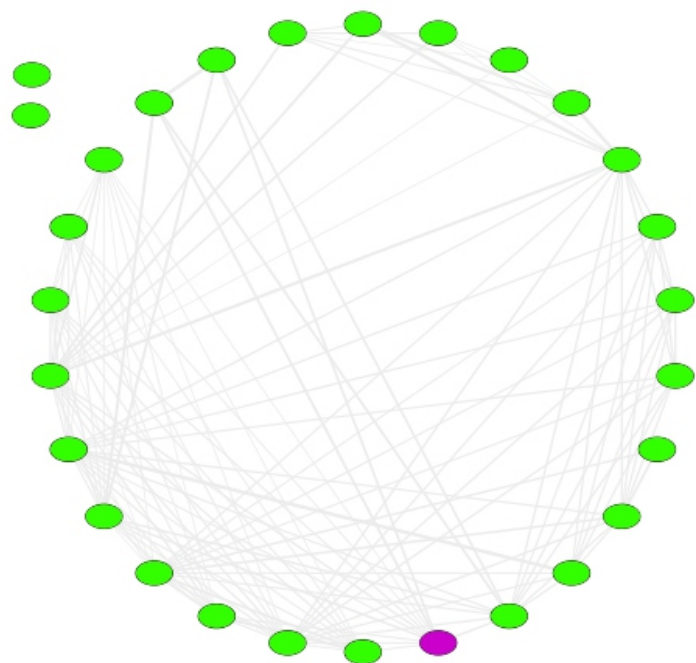

Cluster [-0.344:-0.046]

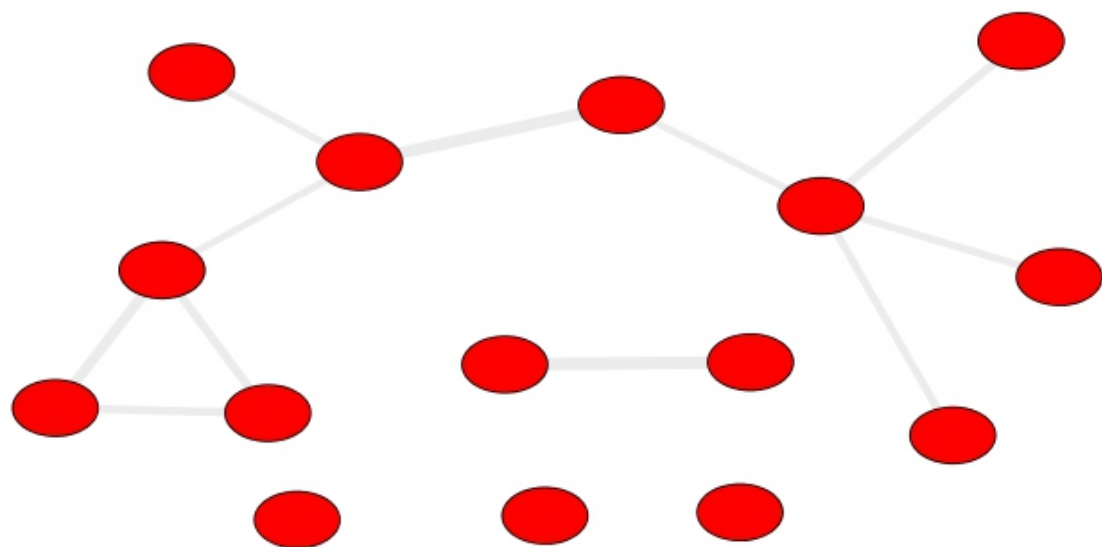

miR-148b

Cluster [-2.544:-0.336]

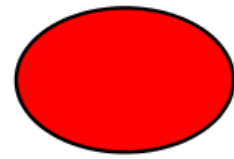

Cluster [0.05:0.749]

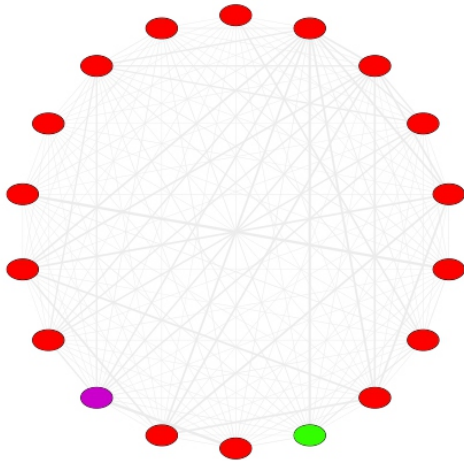

Cluster [0.76:3.427]

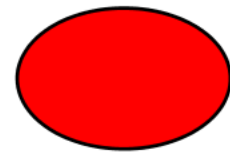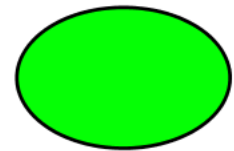

Cluster [-0.335:0.049]

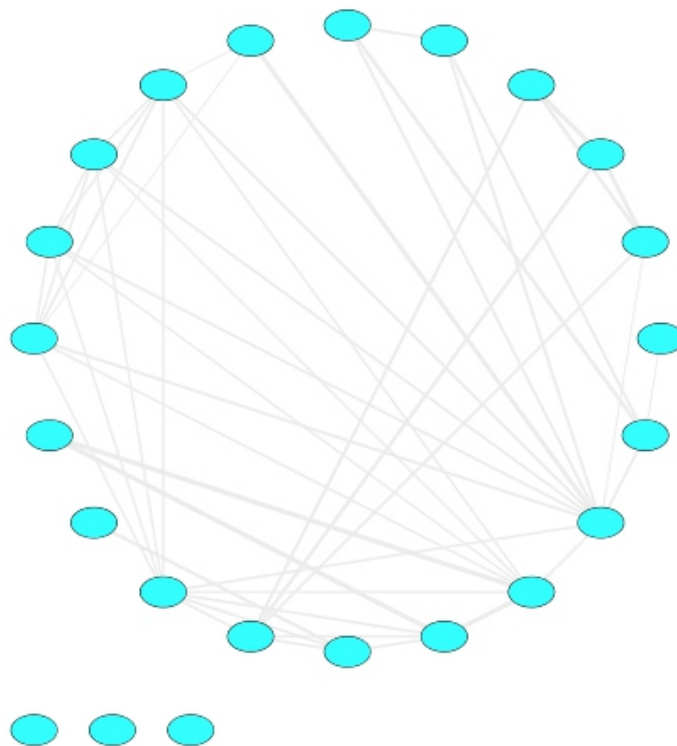

miR-181a

Cluster [0.415:2.751]

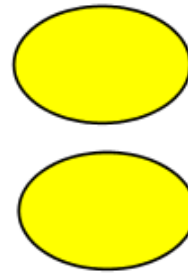

Cluster [-0.331:-0.065]

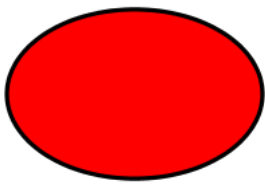

Cluster [-0.064:0.09]

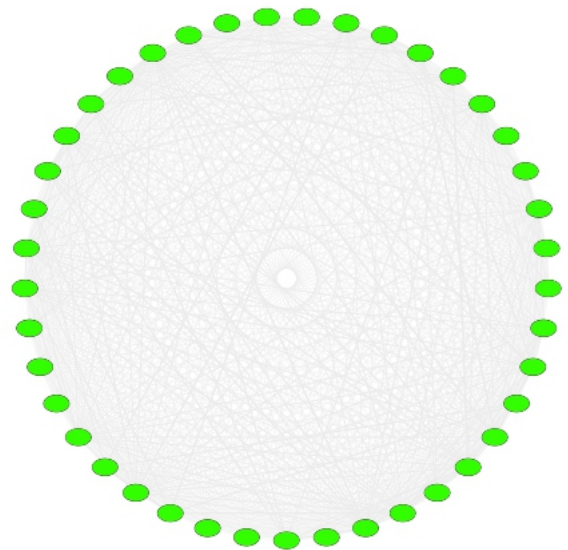

Cluster [0.091:0.41]

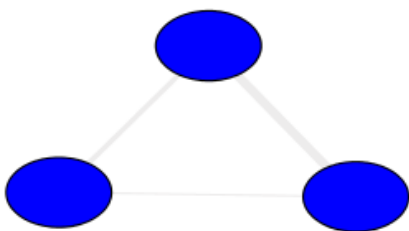

**Supplementary Figure S5.** Correlation between mRNA fold change and the number predicted targets of the 10 miRNAs.

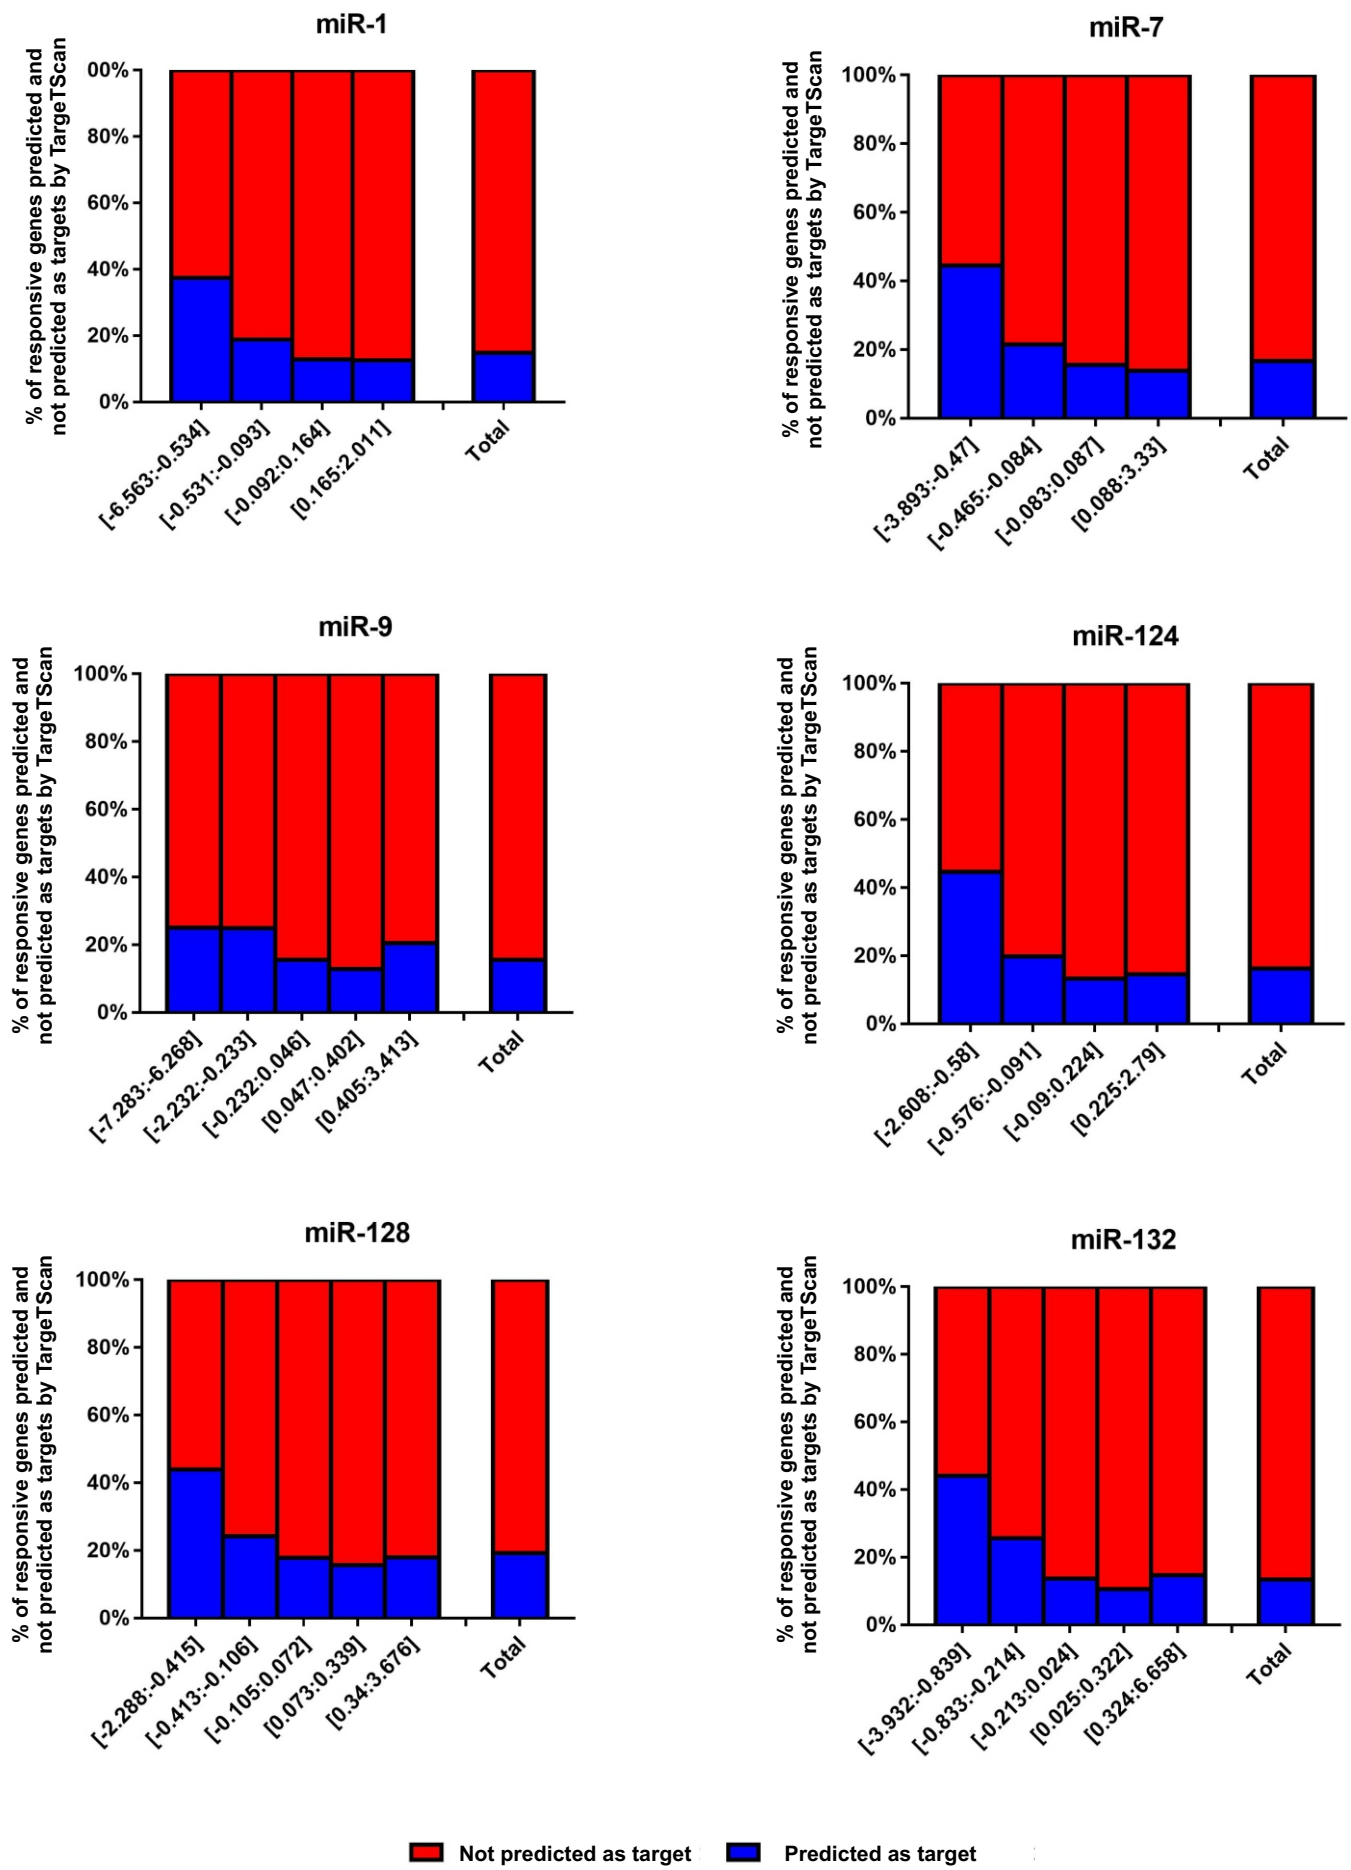

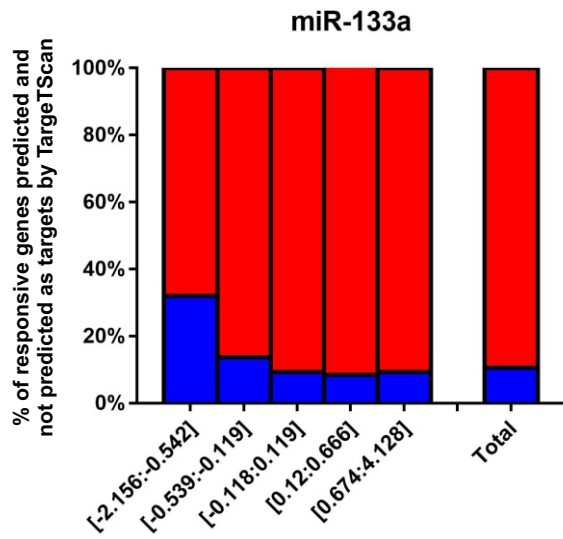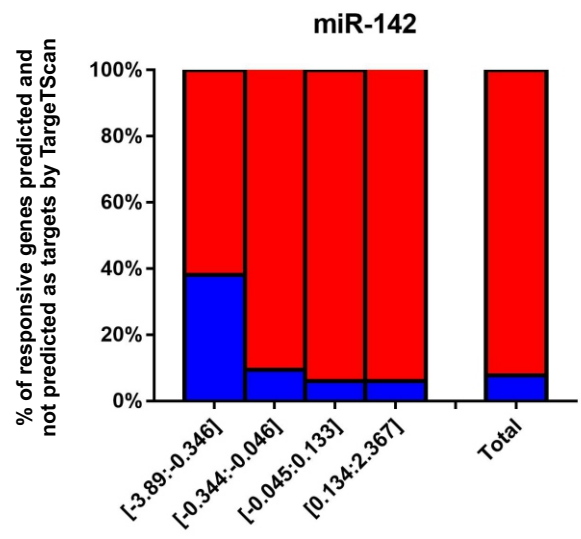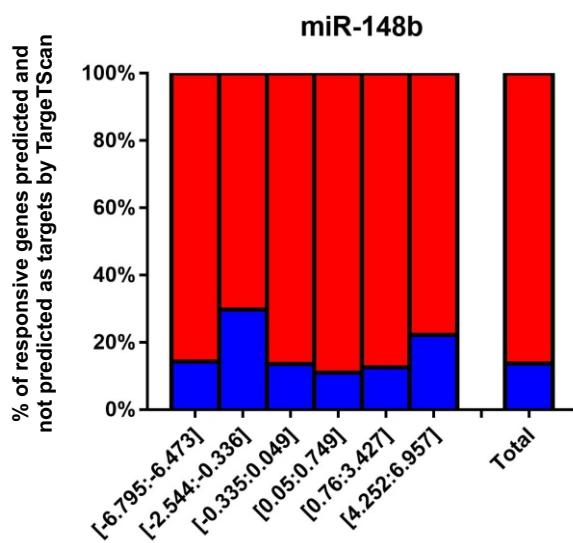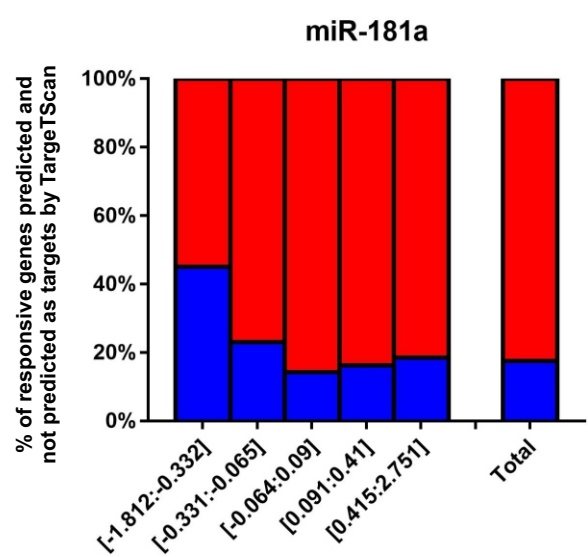

■ Not predicted as target
 ■ Predicted as target

**Supplementary Figure S6.** Correlation between mRNA fold change and Context++Score. To perform this correlation, for each miRNA we separated the targets predicted by TargetScan in five groups according to its Context++Score ([0.1:0.2[; [0.2:0.3[; [0.3:0.4[; [0.4:0.5[ and [0.5:0.6[). Then we calculated the average fold change of the predicted targets of each group. Finally, for each group, we calculated the average fold change of the ten miRNAs.

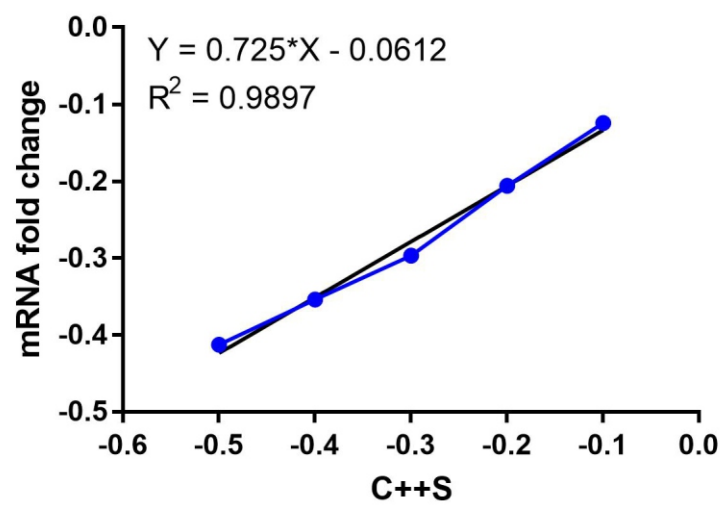

**Supplementary Figure S7.** Heatmaps of Context++Scores of the predicted targets of the ten miRNAs analyzed among ten vertebrate species. Negative Context++Score values are represented in green, positive values are represented in red, and near-zero values are represented in black. Lower Context++Score values represent stronger miRNA regulation levels.

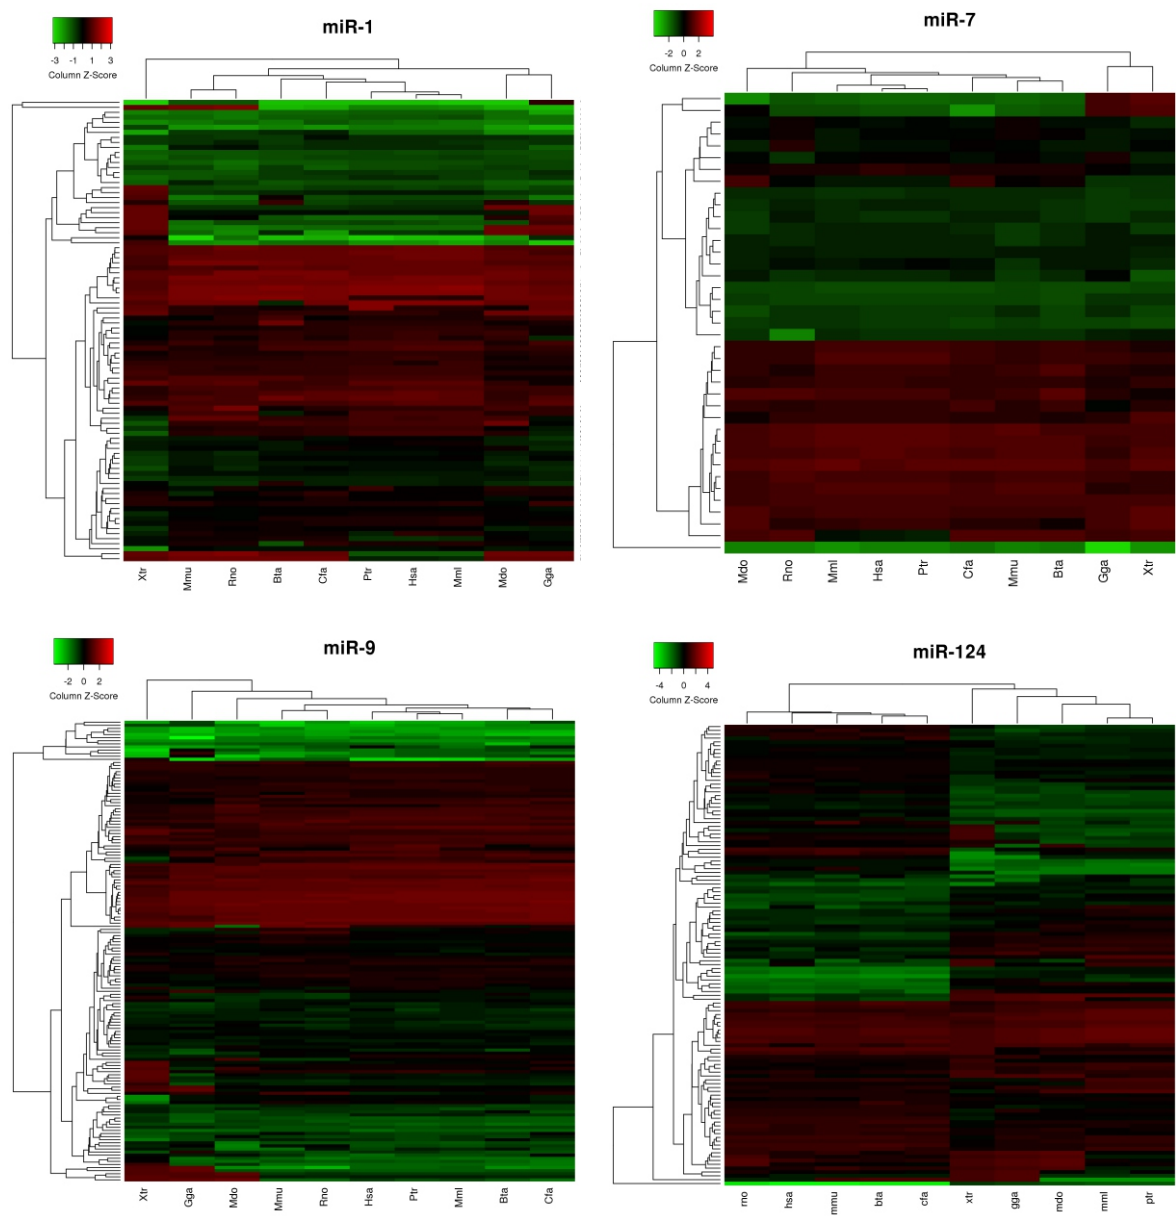

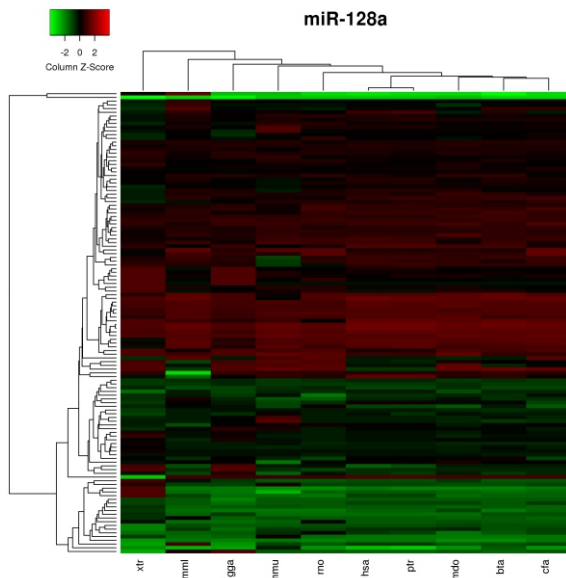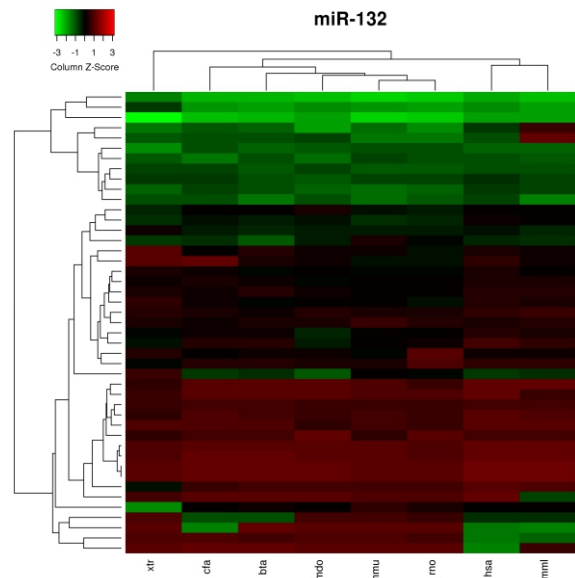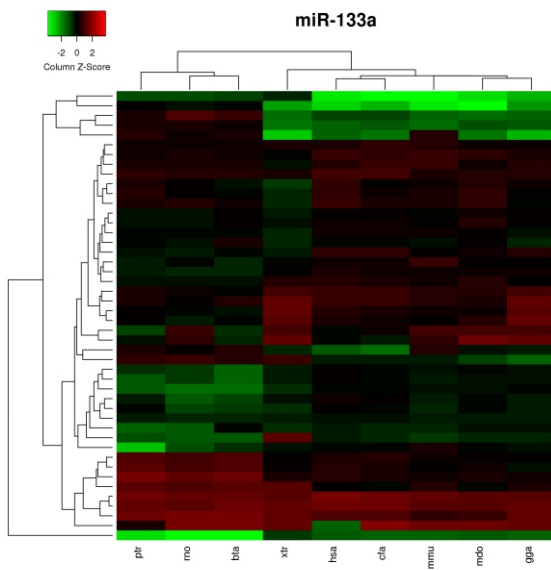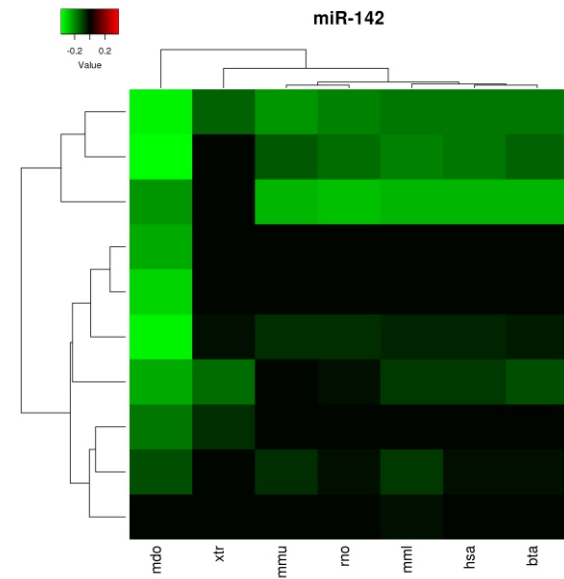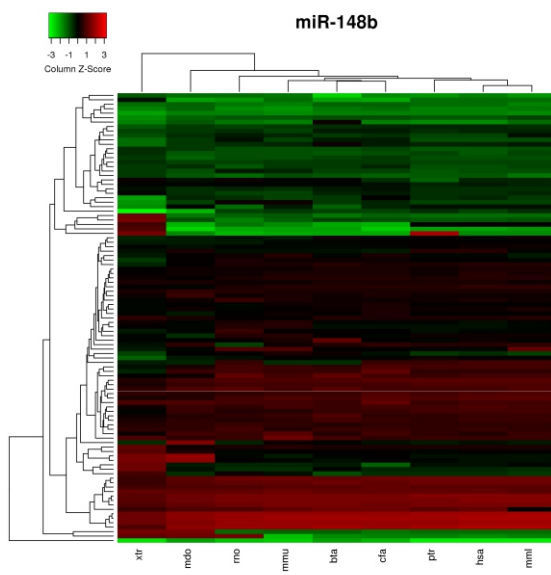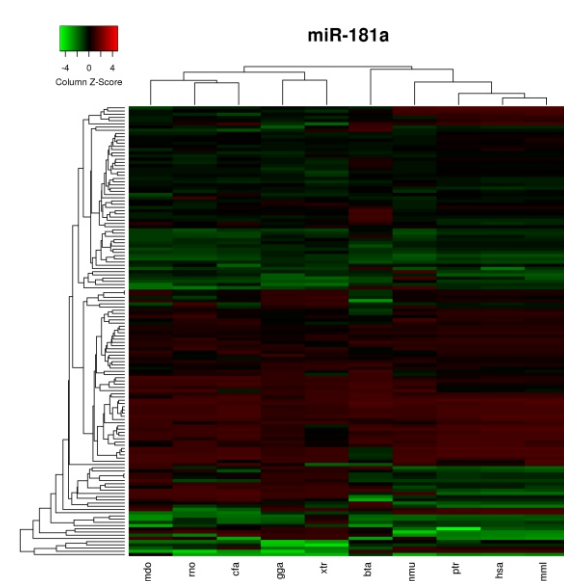

Supplement: Supplementary file 1 [file cells-08-01103-s001.zip › Supplementary Figures.pdf]
