# Supplementary material for: Understanding the Modus Operandi of MicroRNA Regulatory Clusters
Source: Cells. 2019 Sep 18;8(9):1103. doi: 10.3390/cells8091103 (PMC6770051; doi:10.3390/cells8091103)
Supplement: Supplementary file 1 [file cells-08-01103-s001.zip › Supplementary Tables.xlsx]

## Sheet: Supp. Table S1
Supplementary Table S1. Number of genes and enriched terms of each miRNA regulatory cluster.
Regulatory clusters are ordered from down- to up-regulation.
miR-1				miR-124				miR-133a				miR-181a
Cluster	Gene #	Terms #		Cluster	Gene #	Terms #		Cluster	Gene #	Terms #		Cluster	Gene #	Terms #
[-6.563:-0.534]	301	1		[-2.608:-0.58]	458	5		[-2.156:-0.542]	357	1		[-1.812:-0.332]	369	0
[-0.531:-0.093]	2947	88		[-0.576:-0.091]	2981	29		[-0.539:-0.119]	2622	35		[0.415:2.751]	179	3
[-0.092:0.164]	6614	325		[-0.09:0.224]	6814	373		[-0.118:0.119]	7403	119		[-0.331:-0.065]	3197	4
[0.165:2.011]	2333	48		[0.225:2.79]	1926	50		[0.12:0.666	3319	16		[-0.064:0.09]	7452	170
								[0.674:4.128]	98	48		[0.091:0.41]	2602	11
miR-7				miR-128a				miR-142
Cluster	Gene #	Terms #		Cluster	Gene #	Terms #		Cluster	Gene #	Terms #
[-3.893:-0.47]	185	3		[-2.288:-0.415]	436	0		[-3.89:-0.346]	340	9
[-0.465:-0.084]	2556	53		[-0.413:-0.106]	2355	43		[0.134:2.367]	1787	8
[-0.083:0.087]	7825	64		[-0.105:0.072]	6732	64		[-0.344:-0.046]	3912	29
[0.088:3.33]	3232	13		[0.073:0.339]	3889	13		[-0.045:0.133]	7759	97
				[0.34:3.676]	387	5
miR-9				miR-132				miR-148b
Cluster	Gene #	Terms #		Cluster	Gene #	Terms #		Cluster	Gene #	Terms #
[-7.283:-6.268]	5	4		[-3.932:-0.839]	86	1		[-6.795:-6.473]	8	1
[-2.232:-0.233]	1379	101		[-0.833:-0.214]	1077	36		[-2.544:-0.336]	995	1
[-0.232:0.046]	6921	196		[-0.213:0.024]	5976	32		[-0.335:0.049]	7306	61
[0.047:0.402	5191	4		[0.025:0.322]	6340	50		[0.05:0.749]	5340	87
[0.405:3.413]	303	3		[0.324:6.658]	320	8		[0.76:3.427]	112	2
								[4.252:6.957]	19	0

## Sheet: Supp. Table S2
Supplementary Tabe S2. Qui-squared test of regulatory clusters enriched terms.
Regulatory clusters are ordered from down- to up-regulation.
R1, R2, and R3 represent the three random sets used in each analysis.
G.L 0.05 = 5.991
miR-1
Regulatory cluster	Gene #	Terms #	R1	R2	R3	Qui-squared	H0
[-6.563:-0.534]	301	1	0	0	0	3	YES
[-0.531:-0.093]	2947	88	0	2	1	258.057	NO
[-0.092:0.164]	6614	325	54	57	32	711.12	NO
[0.165:2.011]	2333	48	7	1	0	129.042	NO
miR-7
Regulatory cluster	Gene #	Terms #	R1	R2	R3	Qui-squared	H0
[-3.893:-0.47]	185	3	0	0	0	9	NO
[-0.465:-0.084]	2556	53	0	42	9	91.8113	NO
[-0.083:0.087]	7825	64	156	32	63	148.266	NO
[0.088:3.33]	3232	13	0	1	0	37.0769	NO
miR-9
Regulatory cluster	Gene #	Terms #	R1	R2	R3	Qui-squared	H0
[-7.283:-6.268]	5	4	0	3	1	6.5	NO
[-2.232:-0.233]	1379	101	0	0	0	303	NO
[-0.232:0.046]	6921	196	64	52	47	307.964	NO
[0.047:0.402]	5191	4	22	31	44	663.25	NO
[0.405:3.413]	303	3	0	0	1	7.33333	NO
miR-124
Regulatory cluster	Gene #	Terms #	R1	R2	R3	Qui-squared	H0
[-2.608:-0.58]	458	5	1	0	0	13.2	NO
[-0.576:-0.091]	2981	29	2	3	5	68.3103	NO
[-0.09:0.224]	6814	373	31	96	48	802.461	NO
[0.225:2.79]	1926	50	0	1	5	138.52	NO
miR-128a
Regulatory cluster	Gene #	Terms #	R1	R2	R3	Qui-squared	H0
[-2.288:-0.415]	436	0	0	1	0	--	--
[-0.413:-0.106]	2355	43	1	5	0	117.605	NO
[-0.105:0.072]	6732	64	52	38	17	47.3281	NO
[0.073:0.339]	3889	13	2	8	21	16.1538	NO
[0.34:3.676]	387	5	1	3	0	9	NO
miR-132
Regulatory cluster	Gene #	Terms #	R1	R2	R3	Qui-squared	H0
[-3.932:-0.839]	86	1	0	1	0	2	YES
[-0.833:-0.214]	1077	36	0	0	1	106.028	NO
[-0.213:0.024]	5976	32	19	36	91	114.562	NO
[0.025:0.322]	6340	80	33	46	10	103.312	NO
[0.324:6.658]	320	8	0	0	0	24	NO
miR-133a
Regulatory cluster	Gene #	Terms #	R1	R2	R3	Qui-squared	H0
[-2.156:-0.542]	357	1	2	0	0	3	YES
[-0.539:-0.119]	2622	35	2	0	3	95.3714	NO
[-0.118:0.119]	7403	119	85	137	61	40.7059	NO
[0.12:0.666]	3319	16	1	8	13	18.625	NO
[0.674:4.128]	98	48	0	2	0	140.083	NO
miR-142
Regulatory cluster	Gene #	Terms #	R1	R2	R3	Qui-squared	H0
[-3.89:-0.346]	340	9	0	0	0	27	NO
[-0.344:-0.046]	3912	29	12	2	0	64.1034	NO
[-0.045:0.133]	7759	97	132	61	74	31.4433	NO
[0.134:2.367]	1787	8	0	4	16	18	NO
miR-148b
Regulatory cluster	Gene #	Terms #	R1	R2	R3	Qui-squared	H0
[-6.795:-6.473]	8	1	0	0	0	3	YES
[-2.544:-0.336]	995	1	0	1	0	2	YES
[-0.335:0.049]	7306	61	68	120	52	59.1967	NO
[0.05:0.749]	5340	87	18	23	38	129.402	NO
[0.76:3.427]	112	2	0	2	0	4	YES
[4.252:6.957]	19	0	3	0	0	--	--
miR-181a
Regulatory cluster	Gene #	Terms #	R1	R2	R3	Qui-squared	H0
[-1.812:-0.332]	369	0	0	0	1	--	--
[0.415:2.751]	179	3	0	0	0	9	NO
[-0.331:-0.065]	3197	4	4	1	1	4.5	YES
[-0.064:0.09]	7452	170	67	142	117	83.5412	NO
[0.091:0.41]	2602	11	2	0	2	25.7273	NO

## Sheet: Supp. Table S3
Supplementary Table S3. Enriched terms identified by ToppCluster in each miRNA regulatory cluster.
Regulatory clusters are ordered from down- to up-regulation.
miR-1							miR-7							miR-9							miR-124							miR-128							miR-132							miR-133a							miR-142
Cluster [-6.563:-0.534]							Cluster [-3.893:-0.47]							Cluster [-7.283:-6.268]							Cluster [-2.608:-0.58]							Cluster [-2.288:-0.415]							Cluster [-3.932:-0.839]							Cluster [-2.156:-0.542]							Cluster [-3.89:-0.346]
Category	ID	Title (or Source)	Cluster logP	Cluster GeneSet			Category	ID	Title (or Source)	Cluster logP	Cluster GeneSet			Category	ID	Title (or Source)	Cluster logP	Cluster GeneSet			Category	ID	Title (or Source)	Cluster logP	Cluster GeneSet			Category	ID	Title (or Source)	Cluster logP	Cluster GeneSet			Category	ID	Title (or Source)	Cluster logP	Cluster GeneSet			Category	ID	Title (or Source)	Cluster logP	Cluster GeneSet			Category
Pathway	82979	Amino sugar and nucleotide sugar metabolism	3.92881	CHIA,FPGT,GNE,GNPDA2,NANP,PGM2			Pathway	83108	Pancreatic cancer	4.41313	CASP9,EGFR,PIK3CD,RAF1,RELA,TGFA			GO: Biological Process	GO:0044245	polysaccharide digestion	3.19094	SI			GO: Biological Process	GO:1901701	cellular response to oxygen-containing compound	10	ADAMTS1,ADCY2,ADCY3,ANXA5,ATP6V0E1,ATP7A,BMP6,CAV1,COL4A1,CPT1A,CYP1B1,DDIAS,DGAT2,DNM2,DNMT3B,EGR1,FBXO32,FECH,FOS,GCH1,GNG10,GNG13,ITGB1,KANK1,KLF4,KRT13,LITAF,MAPK14,MMP2,NR4A1,NR4A3,OSBPL8,PDE3B,PIK3C2A,PLEKHA1,PLSCR3,PLSCR4,PPIF,RAB31,RAD51,RARG,RELA,SHC1,SMARCC1,SNAI2,SRF,STAT3,STK26,TEAD1,VDR										Pathway	413401	Inositol phosphate metabolism, Ins(1,3,4,5)P4 => Ins(1,3,4)P3 => myo-inositol	3.21857	IMPA1,INPP5K			GO: Biological Process	GO:0016126	sterol biosynthetic process	5.04067	CYP51A1,DHCR7,ERG28,FGF1,HMGCR,HSD17B7,MVK,SCAP			GO: Biological Process
							Pathway	83109	Endometrial cancer	3.89011	CASP9,CDH1,EGFR,PIK3CD,RAF1			Pathway	82931	Galactose metabolism	2.3033	SI			Pathway	413380	Fatty acid biosynthesis, elongation, mitochondria	5.1724	ACAA2,HADH,HADHA,HADHB																								GO: Biological Process
Cluster [-0.531:-0.093]							Pathway	83111	Prostate cancer	3.66497	CASP9,EGFR,PIK3CD,RAF1,RELA,TGFA			Pathway	82974	Starch and sucrose metabolism	2.23845	SI			Pathway	83105	Pathways in cancer	4.34893	ADCY2,ADCY3,ARAF,ARHGEF1,BID,BMP2,CDK4,CDK6,COL4A1,DVL2,FOS,GNAI3,GNG10,GNG13,ITGB1,LAMC1,MECOM,MMP2,NRAS,RAD51,RASGRP4,RASSF5,RELA,STAT3,VHL			Cluster [-0.413:-0.106]							Cluster [-0.833:-0.214]							Cluster [-0.539:-0.119]							GO: Biological Process
Category	ID	Title (or Source)	Cluster logP	Cluster GeneSet										Pathway	170720	Carbohydrate digestion and absorption	2.15144	SI			Pathway	82966	beta-Alanine metabolism	3.87772	ALDH9A1,AOC2,AOC3,DPYD,HADHA,SMOX			Category	ID	Title (or Source)	Cluster logP	Cluster GeneSet			Category	ID	Title (or Source)	Cluster logP	Cluster GeneSet			Category	ID	Title (or Source)	Cluster logP	Cluster GeneSet			GO: Biological Process
GO: Biological Process	GO:0010817	regulation of hormone levels	10	ABCB1,ADCYAP1,ADORA1,ADORA3,AKR1C1,AKR1C2,ALDH8A1,ANXA1,ARL2BP,ARNTL,ARRB1,ATG7,ATP1A1,ATP6AP2,BCO1,BMP2,BMP5,C1QTNF3,CACNA1E,CACNA2D2,CCKAR,CCKBR,CCL5,CGA,CLTRN,CNR1,COMT,CPA3,CPLX1,CPT1A,CRH,CTSG,CYB5R4,EDN2,EPHA5,ESR1,FAM3B,FDX1,FDXR,FGF23,FGFR4,FKBP1B,FZD4,GHSR,GLUD1,GLUL,GPER1,GPR39,HADH,HNF4A,HSD17B1,HSD17B2,HSD17B4,HSD17B7,HSD3B2,HTR2A,HTR2C,ICA1,IDE,IGF2,IL11,IL1B,IL6,INHA,INHBB,IRS1,JAK2…			Cluster [-0.465:-0.084]														Pathway	82935	Fatty acid degradation	3.8719	ACAA2,ALDH9A1,CPT1A,ECI2,HADH,HADHA,HADHB			GO: Biological Process	GO:0090132	epithelium migration	10	AAMP,ADAM9,AQP1,BMPR2,CAPN7,CCBE1,CEACAM1,CORO1B,CYP1B1,DLL4,ENPP2,FBXW7,FERMT1,FGF1,FGF18,FGF8,GAB2,GIPC1,GREM1,HBEGF,HDAC5,HMGB1,IL4,ITGAV,ITGB2,KIT,KLF4,KRIT1,KRT2,MCC,MET,MYH9,NFE2L2,NR2F2,PBLD,PLXND1,PRCP,PRKCE,PRKD1,PRSS3,PTEN,RGCC,ROCK2,S100P,SASH1,SEMA4A,SNAI2,SRPX2,STRAP,TAC1,TACR1,TEK,TGFBR1,VEGFC,VHL,ZC3H12A,ZEB2,ZNF580			GO: Biological Process	GO:0009967	positive regulation of signal transduction	10	ACVR1,ACVR2B,ADAM8,ADORA3,AGR2,AJUBA,AKR1C2,AKR1C3,ALK,ALOX15,APOPT1,BAG4,BCL2L14,BNIP2,CCL17,CCL23,CCL5,CCL7,CCN2,CCN3,CDH3,CDON,CHI3L1,CITED2,CRK,CSF2,CX3CL1,CYLD,DAB2IP,DCDC2,DCN,DDX5,DOCK2,DUSP19,ECT2,EDN1,EDN3,EREG,EVC,FGB,FGF19,FGF4,FGF9,FOXA1,G0S2,GADD45B,GATA3,GLRX,GPRC5B,GRB10,HBEGF,HDAC2,HES1,HMOX1,HTR2B,IFNG,IFNL1,IGF1,IL13,IL23R,IL5,IL6,ITM2C,JAK2,KITLG,KRAS,LCK,LDLRAP1,LEFTY1,LFNG,LH…			GO: Biological Process	GO:0001934	positive regulation of protein phosphorylation	10	ABL1,ACKR3,ACSL1,ADAM8,ADAM9,ADCY6,ADCYAP1,AGAP2,AJUBA,AKAP9,AKT1,ALOX12B,ALS2,ARL6IP5,ARRB1,ARRB2,BAX,BDNF,BIRC7,BMP10,BMP15,BMP3,BMPR2,BNIP2,C1QTNF3,CACUL1,CALM2,CAMKK1,CAMKK2,CAV1,CCDC88A,CCN1,CCN2,CCNC,CCNL2,CCNT1,CCNY,CCR1,CD44,CD6,CDC6,CDH2,CDK10,CENPE,CHI3L1,CLN3,CREBL2,CRK,CRLF1,CSF1R,CTNNB1,CX3CL1,CXCR4,DBF4B,DBNL,DIRAS1,DSTYK,DUSP19,EIF4G3,EMP2,EPHA7,EPOR,ERBB2,EZH2,F2,FAM129A,FAM20A,FG…			GO: Biological Process
GO: Biological Process	GO:0050878	regulation of body fluid levels	10	ACTB,ADCY7,ADORA1,ADORA3,AKAP10,AP3B1,APRT,AQP2,ARRB1,ASIC2,ATG7,ATP7B,AVPR2,BLOC1S6,C3,CAD,CAPZB,CBX5,CCKAR,CCND1,CD34,CD9,CELSR2,COL3A1,CX3CL1,CYBA,DGKB,DGKE,DGKG,DOCK6,EDNRB,EMP2,ENTPD2,ERBB4,EVL,F10,F13B,F2RL2,F7,F8,F9,FAP,FBLN1,FCER1G,FIBP,FLNA,FYN,GBA,GC,GNA12,GNB1,GP1BA,GP6,GPI,GRHL1,GUCA1B,HBB,HNF4A,HPS1,HPSE,IL6,JAK2,KCNN4,KDF1,KRT16,LAT,LCK,LMAN1,LNPK,MFN2,MYH9,MYL9,NPPB,NR1H3,P2RX2,P2R…			Category	ID	Title (or Source)	Cluster logP	Cluster GeneSet			Cluster [-2.232:-0.233]														GO: Biological Process	GO:0048646	anatomical structure formation involved in morphogenesis	10	AAMP,ABCC4,ABLIM3,ACKR3,ACTR2,ACVR1,ADAM9,ADAMTS1,ADGRB1,ADIPOR2,ADM,ADORA2B,ALDH1A1,ANPEP,APOD,AQP1,ARID1A,ARL13B,ATP7A,ATP8A2,ATP8B1,ATXN10,BAK1,BBS1,BBS10,BBS4,BBS9,BMPR2,BYSL,C3,CALB1,CAMP,CASP8,CASP9,CASQ1,CASQ2,CAV1,CBLN1,CCBE1,CCNG1,CCR3,CD53,CD9,CEACAM1,CELSR2,CFL2,CLIC4,COBL,COL12A1,COL15A1,COL1A1,CPLANE1,CSNK1D,CTHRC1,CXCR2,CXCR4,CYLD,CYP1B1,DLL4,DLX6,DMP1,DMRT2,DUSP1,DUSP2,DYNC2H1,DYNC…			GO: Biological Process	GO:0030182	neuron differentiation	10	ACSL4,ADNP2,ALK,ANKRD27,ANOS1,APBB1,APP,ARF6,ATP7A,ATP8A2,ATP8B1,B3GNT2,BCL11A,BCL6,BLOC1S6,BNIP2,BRINP3,CALU,CAMSAP2,CCDC88A,CCL5,CDON,CHODL,CLIC5,CLMN,CNTN4,CNTNAP2,DAB2IP,DCDC2,DLX1,DLX2,DPYSL3,ECT2,EDN3,EFNB2,EPHA7,EPHB1,EPHB2,FLRT3,FOXA1,FRY,GABRB1,GATA3,GPM6A,GPRC5B,HDAC2,HES1,HEY1,HEY2,HOXC8,HOXD10,ID1,ID2,IFNG,IL6,INPP5F,ITM2C,JAK2,KRAS,LGI1,LINGO1,LMO4,LYN,LZTS1,MAPK1,MAPK8,MEF2A,MICALL1…			GO: Biological Process	GO:0048646	anatomical structure formation involved in morphogenesis	10	ACKR3,ACTA1,ACTC1,ACTG1,ADAM12,ADAM8,ADAM9,ADGRA2,ADM,AGGF1,AHI1,ALDH1A3,ALMS1,ANKRD23,ARL13B,ATP7A,ATP8B1,ATXN10,BAX,BBS2,BBS7,BMP10,BMPR2,CALB1,CAV1,CCDC113,CCN1,CCN2,CCN6,CCNB1IP1,CCNO,CD34,CD44,CD9,CDC14A,CELSR2,CEP131,CEP135,CEP164,CEP83,CFAP53,CHI3L1,CLIC4,CLUAP1,CNOT3,CNTNAP1,COL11A1,COL15A1,COL18A1,COL1A1,COQ7,CPLANE2,CTNNB1,CUL3,CX3CL1,CXCL13,CXCR4,CYLD,DEAF1,DKK1,DLL4,DLX6,DMRT2,DNAH7,D…			GO: Biological Process
GO: Biological Process	GO:0010243	response to organonitrogen compound	10	AARS,ABCG2,ACTN2,ADCY7,ADGRL3,ADRA1B,AKAP5,AKAP7,ANXA1,AOC1,APP,APRT,ASNS,ATP2B4,ATP6AP1,ATP6V0A1,ATP6V0A2,ATP6V1B2,ATP7B,AVPR2,BAIAP2,BAIAP2L2,BLM,C2CD5,CACYBP,CAD,CALM2,CASP3,CASQ2,CASTOR1,CAT,CAV2,CBS,CCL2,CCL5,CCND1,CDC5L,CDK2,CHRNA1,CHRNA2,CHRNA3,CHRNA4,CHRNB1,CIB2,CITED1,CNR1,CNR2,COL16A1,COL3A1,COL4A1,COL5A2,CREM,CRH,CTSB,CYBA,CYP27B1,CYP2E1,DNMT3A,DPYSL2,EIF2B2,EIF6,F7,FLT3,FYN,GAB1,GABRB…			GO: Biological Process	GO:0072594	establishment of protein localization to organelle	10	ACSM6,AGTR2,AKAP6,ATP5IF1,BAD,BAMBI,BAP1,BAX,BBC3,BCL3,BMP4,BNIP3L,C1QTNF3,CCT4,CCT7,CCT8,CDKL2,CFL1,CHMP4A,CREB3,CRY2,CSNK2A2,DMAP1,DUSP18,DYNLL1,ELMOD1,FAM89B,FZD5,G3BP2,GLI3,GNPTAB,GOSR2,GREM1,GSK3A,HK2,HNMT,HSPA4,HSPA8,HYAL2,IGF1,IL18,IL18R1,IL1B,ING1,IPO11,JAK2,KANK1,KPNA1,KPNA6,KPNB1,LEP,MYBPC1,NEDD4,NFKBIA,NFKBIE,NLRP3,NOP58,NRAS,NUP50,NUTF2,PAM16,PBLD,PDCD5,PEX5L,PEX6,PHIP,PLAGL2,PPP1R13B…			Category	ID	Title (or Source)	Cluster logP	Cluster GeneSet			Cluster [-0.576:-0.091]							GO: Biological Process	GO:0072358	cardiovascular system development	10	AAMP,ACKR3,ACVR1,ADAMTS1,ADGRB1,ADIPOR2,ADM,ADORA2B,AKAP6,ANKRD17,ANPEP,AP1B1,AP2B1,APOB,APOD,AQP1,ARID1A,ARL13B,ATP7A,BAK1,BBS4,BMPR2,BVES,C3,CAMP,CASP8,CAV1,CCBE1,CCM2L,CCR3,CEACAM1,CHM,CLIC4,COL15A1,COL1A1,COL3A1,CPLANE1,CTH,CXCR2,CXCR4,CYP1B1,DCTN5,DIPK2A,DLL4,DSP,DYNC2H1,EGF,ENPP2,EP300,EPC1,EPHB2,ESM1,FADD,FBN1,FBXW7,FGF1,FGF12,FGF18,FGF8,FHL2,FLNA,FLT1,GATA2,GNA13,GNAQ,GPER1,GREM1,GYS1,HBE…			GO: Biological Process	GO:0007167	enzyme linked receptor protein signaling pathway	10	ACTR2,ACVR1,ACVR2B,AGR2,AKAP4,AKAP7,ALK,AMHR2,ANOS1,APH1B,APP,ARID5B,ATP6V0D2,ATP6V1E2,CCN2,CCN3,CDH3,CITED2,CRIM1,CRK,CTDSPL2,DAB2IP,DCN,DMRT1,DOK5,EFNB2,EPHA7,EPHB1,EPHB2,EREG,ERRFI1,FERMT2,FGF19,FGF4,FGF6,FGF9,FLRT3,GATA3,GLRX,GPLD1,GRB10,GUCY2C,GUCY2F,HBEGF,HES1,HNRNPM,HTRA3,ID1,IGF1,JAK2,KRAS,LCK,LEFTY1,LEMD3,LTBP1,LYN,MAPK1,MST1,MSTN,NCF2,NR1H4,NREP,PAG1,PDGFRA,PIK3C2A,POLR2C,PRLR,PTPRG,REP…			GO: Biological Process	GO:0030030	cell projection organization	10	ABL1,ACSL4,ACTR3,ADCY6,ADCYAP1,ADGRV1,ADM,AHI1,AJUBA,AKT1,ALMS1,ALS2,APOA5,APP,ARAP1,ARFIP2,ARHGAP4,ARHGEF1,ARL13B,ARPC2,ATP7A,ATP8B1,ATXN10,B3GNT2,BAG5,BBS2,BBS7,BDNF,BIN3,BLOC1S6,BMPR2,BTBD3,BTG2,C5orf30,CALU,CAMSAP2,CARM1,CAV1,CCDC113,CCDC78,CCDC88A,CCNO,CD44,CDC14A,CDC20,CDC42EP2,CDH2,CDHR5,CDK16,CELSR2,CEP131,CEP135,CEP164,CEP83,CFAP410,CFAP53,CHODL,CIT,CLN3,CLUAP1,CNTNAP1,COL25A1,CPLANE2,CR…			GO: Biological Process
GO: Biological Process	GO:0051960	regulation of nervous system development	10	ACTR3,ADCYAP1,ADGRL3,AKAP5,AMIGO2,ANKRD27,APP,ARHGAP4,ARHGEF1,ARNTL,ASIC2,ATF1,ATP8A2,AVIL,BAIAP2,BCL11B,BDNF,BMP2,BMP5,CBLN1,CCL5,CDC20,CDH2,CHN1,CHRNA3,CIT,CLSTN2,CNR1,CNTN2,COL3A1,CSPG4,CUL7,CUX1,CX3CL1,DBN1,DCC,DDX6,DGUOK,DISC1,DKK1,DLL4,DPYSL2,DSCAM,EDNRB,EFNA3,EGF,EIF2B2,ENPP2,EOMES,EPOR,ERBB4,ETV5,FEZ1,FGF13,FIG4,FKBP1B,FLRT1,FLRT3,FMOD,FOXO3,FYN,FZD3,GDI1,GHSR,GLI1,GLI2,GPER1,GPRC5B,GRIN1…			GO: Biological Process	GO:0044403	symbiont process	10	ABI1,ACKR3,APOBEC3B,APOBEC3D,ATG16L1,ATG7,BAD,BANF1,BAX,BNIP3L,BTRC,C1QBP,CAMP,CAV1,CD55,CD86,CENPU,CFL1,CHMP4A,CHMP5,CLDN9,CLEC4G,CR2,CREB3,CRTC3,CUL1,CX3CR1,CXCL8,CXCR4,CXCR6,DDX11,DEK,DHX58,DPP4,DYNLL1,EIF3B,EIF3D,F11R,FCN1,FCN3,FKBP8,FURIN,GTF2F1,GYPA,HDAC1,HPN,HPX,HSPA8,HSPD1,HYAL2,IFITM2,IFITM3,IL6ST,ILF3,KARS,KDM4A,KPNA1,KPNB1,KRT18,KRT19,KRT7,LAMP3,LEF1,LTF,MITD1,MSH6,NECTIN4,NEDD4,NFKBIA…			GO: Biological Process	GO:0044403	symbiont process	10	ADAR,ANKRD17,APOBEC3F,APOBEC3G,BCL2L11,BRD4,CARM1,CAV1,CAV2,CBX5,CCL5,CCNT1,CREB3,CXCL2,CXCR4,DAG1,DDX58,DICER1,DYNC1LI1,DYNLL1,EFNB2,EIF2AK2,EIF3B,EIF3D,EIF4A1,EIF4G1,EIF4G3,EP300,FMR1,GBF1,GBP2,HIPK2,HLA-A,HLA-B,HMGA2,HSP90AB1,HSPA8,IFIT1,IFITM1,IFITM2,IFITM3,IPO5,IPO7,IRF8,ISG15,ITGB6,KARS,KDR,KPNB1,KRT19,LEF1,MX1,NEDD4,NOTCH1,NUP205,NUP210,NUP214,NUP54,NUP58,PDCD6IP,PKN2,PLSCR1,POLR2A,PSMA7,P…			Category	ID	Title (or Source)	Cluster logP	Cluster GeneSet			GO: Biological Process	GO:0061061	muscle structure development	10	ACVR1,ADM,AEBP1,AKAP6,ANKRD17,ARID1A,ARID5B,BCL2,BIN1,BVES,CACNB4,CASQ1,CASQ2,CAV1,CCL17,CCM2L,CD164,CD53,CDK9,CENPF,CFL2,COL3A1,COPS2,CRYAB,CTF1,CTH,DLL4,DNER,DSP,DTNBP1,EDNRB,EHD1,EP300,EPC1,FBXO22,FGF8,FHL1,FHL2,FKTN,FOS,FOXN2,FRG1,GDF15,GPER1,GREM1,H3F3B,HBEGF,HDAC5,HEYL,HIF1AN,HOXD10,IGF1,IGF2,IGFBP3,IL18,IL4,IL6,ISL1,ITGA11,JPH1,KDM1A,KIT,KLF5,KLK3,KMT5B,KRAS,LAMA5,LMOD3,LUC7L,MAP2K4,MAP3K5…			GO: Biological Process	GO:0071396	cellular response to lipid	10	ABCG2,ACVR1,ADCY2,ADCY3,ADNP2,AKR1C2,AKR1C3,ALOX12,ATP2B1,BRINP3,CCL5,CD55,CRHBP,CSF2,CYP26B1,CYP7A1,DAB2IP,DDX5,EDN1,ERRFI1,ESRRG,FOXA1,GLRX,GPLD1,H2AFZ,HDAC2,HEY1,HNF4G,HNRNPM,IFNG,IGF1,IL6,JAK2,LDLR,LMO3,LYN,MAPK1,MAPK8,MED14,MED30,MSTN,NR1D2,NR1H4,NR1I3,NR2E1,NR4A2,PAQR6,PIM1,PLSCR4,RB1,RET,RIPK2,RNF14,SAFB,SIRT1,SNAI2,SRC,TLR2,TNIP2,TUT4,WNT2,WNT3			GO: Biological Process	GO:0051402	neuron apoptotic process	10	AARS,ADAM8,AGAP2,AMBRA1,APP,ATP7A,BAX,BDNF,BTG2,CDC34,CLN3,CRLF1,CTNNB1,DLX1,EGLN2,EN2,EPHA7,EPOR,G6PD,GCLC,GCLM,GRIK2,HDAC1,HDAC4,HIF1A,HRAS,HSP90AB1,HSPD1,HSPH1,HYOU1,IL1B,KCNIP3,KIF14,LIG4,MAP3K11,MAPK8,MAX,MCL1,NCF2,NF1,NONO,NRBP2,NTF4,OPTN,PARK7,PCP4,PCSK9,PDPK1,PINK1,PMAIP1,POU4F1,POU4F3,RETREG1,RHOA,SCN2A,SOD1,STAMBP,STXBP1,TNFRSF21,TOX3,TP53,TP63,TP73,UNC5B,VEGFB,ZPR1			GO: Biological Process
GO: Biological Process	GO:0019216	regulation of lipid metabolic process	10	ABHD6,ACADVL,ACSL4,ADORA1,ANXA1,APOB,APOD,ATG7,ATP1A1,BCL11B,BMP2,BMP5,BSCL2,C3,CCKBR,CCNC,CDK8,CNR1,CPT1A,CREBL2,CYP27B1,CYP7A1,DHCR7,EIF6,ERBB4,ERLIN1,ERLIN2,ESR1,FBXW7,FDPS,FGF1,FGF19,FGFR4,FLT3,GHSR,GPER1,GPR39,H2AFY,HNF4A,HTR2A,HTR2C,IGF2,IGFBP7,IL1B,INSIG1,IRS1,KLF4,LHCGR,LSR,MID1IP1,MLYCD,NR1H3,NT5E,NUCB2,ORMDL1,ORMDL2,PC,PDE3B,PDGFA,PDGFRA,PDK3,PDK4,PDP1,PEX2,PIK3R1,PLA2G6,PNPLA2,PPARA,PP…			GO: Biological Process	GO:0044764	multi-organism cellular process	10	ABI1,ACKR3,APOBEC3B,APOBEC3D,ATG16L1,ATG7,BAD,BANF1,BAX,BIRC2,BIRC3,BNIP3L,BTRC,C1QBP,CAV1,CD55,CD86,CENPU,CFL1,CHMP4A,CHMP5,CLDN9,CLEC4G,CR2,CREB3,CRTC3,CUL1,CX3CR1,CXCL8,CXCR4,CXCR6,DDX11,DEK,DHX58,DPP4,DYNLL1,EIF3B,EIF3D,F11R,FCN1,FCN3,FKBP8,FURIN,GTF2F1,GYPA,HDAC1,HPN,HPX,HSPA8,HSPD1,HYAL2,IFITM2,IFITM3,IL6ST,ILF3,KARS,KDM4A,KPNA1,KPNB1,KRT18,KRT19,KRT7,LAMP3,LEF1,LTF,MITD1,MSH6,NECTIN4,NEDD4…			GO: Biological Process	GO:0006986	response to unfolded protein	10	AARS,ACADVL,ASNS,ATF3,ATF4,ATF6,BBC3,BCL2L11,CREB3,CREB3L2,CREBRF,DDIT3,DNAJB1,DNAJB9,DNAJC3,EDEM2,EIF2AK2,EP300,ERP44,HDGF,HERPUD1,HSP90AB1,HSP90B1,HSPA8,HYOU1,IGFBP1,LMNA,MFN2,PARP16,PDIA5,SEC31A,SHC1,TLN1,XBP1			GO: Biological Process	GO:0048646	anatomical structure formation involved in morphogenesis	10	ABCC4,ABLIM3,ACTA1,ACTN1,ACTN2,ACVRL1,ADAM17,ADGRA2,ADGRB1,ADIPOR2,AHI1,AIMP1,AKAP13,ALDH1A1,ALMS1,ANG,ANGPT1,APOH,ARL13B,ATF2,ATOH8,ATP2B2,ATP8B1,AXIN1,BBS1,BBS4,BCAS3,BCL2L11,BCL6,BMP10,BMPR1A,C16orf45,C3,C5,CACNA1S,CALB1,CAMK1,CASP9,CASQ1,CASQ2,CCBE1,CCDC40,CCN1,CCNB1IP1,CCNO,CCR3,CD109,CDC42,CDH1,CDK5R1,CDX1,CEACAM1,CELSR1,CEND1,CENPJ,CEP83,CIB1,CLEC1B,COBL,COL12A1,COL4A2,COL5A2,CTNNB1,CUL3,C…			GO: Biological Process	GO:0032870	cellular response to hormone stimulus	10	AACS,ABCG2,ACVR1,ADAMTS1,ADCY3,ADCY4,ADCY6,ADCY7,ADCYAP1,ADIPOR2,AKR1C1,AKR1C2,AKR1C3,AKT2,APEX1,APOB,APOBEC1,AQP1,ARID1A,ATP2B1,ATP6V0A1,ATP6V1B1,ATP6V1H,AVPR1B,AVPR2,BAIAP2L1,BBS4,BUD31,CASP9,CAV1,CEACAM1,CGA,CPEB2,CPS1,CRHBP,CTSL,CYP11B1,DAB2,DUSP1,EFNA5,ENPP1,EP300,ESRRG,FBN1,FHL2,FKBP4,FOS,FOSB,GLP1R,GNG12,GPAM,GPER1,GPHB5,H2AFZ,HDAC5,HEYL,HNRNPD,IGF1,IGF2,IGFBP1,IL18,IL6,INHBB,ISL1,KAT2B,KI…			GO: Biological Process	GO:0016477	cell migration	10	ACVR1,ADAM8,ADGRL3,ADORA3,AJUBA,ALOX12,APBB1,ARHGAP24,ARHGAP5,ARID5B,ARL13B,BAG4,BDKRB1,C5orf30,CCDC88A,CCL17,CCL23,CCL5,CCL7,CCN2,CCN3,CITED2,CNR2,CX3CL1,CXCL14,CXCL2,DAB2IP,DACH1,DCDC2,DCN,DMRT1,DPYSL3,EDN1,EDN2,EDN3,EFNB2,ENPEP,EPHB1,EPX,FERMT1,FGF19,FGF4,FLRT3,GATA3,GNA13,GNRH1,GPLD1,GPM6A,HAS1,HBEGF,HES1,HMOX1,HRH1,HTR2B,ID1,IFNG,IGF1,IL6,JAK2,KITLG,KRAS,LCK,LEFTY1,LEMD3,LMO4,LRP5,LYN,MAPK1,…			GO: Biological Process	GO:0009967	positive regulation of signal transduction	10	ABL1,ABRA,ACKR3,ACPP,ADAM8,ADAM9,ADCYAP1,ADGRV1,AGAP2,AJUBA,AKAP12,AKT1,ALDH1A3,ALOX12B,ALS2,ARAP1,ARHGAP4,ARL6IP5,ARNTL,ARRB1,ARRB2,BAD,BAX,BDNF,BIK,BIRC3,BIRC7,BMF,BMP10,BMP15,BMP3,BMPR2,BNIP2,C1QTNF3,CALM2,CAV1,CCN1,CCN2,CCR1,CD44,CDH2,CDH3,CDK10,CDKN1C,CHI3L1,CHP2,CNTNAP1,COL1A1,CRK,CRLF1,CSF1R,CSNK1E,CTNNB1,CX3CL1,CXCR4,CYLD,DBN1,DBNL,DIRAS1,DKK2,DLL4,DSTYK,DUSP19,EIF2AK3,EMP2,EPOR,ERBB2,EVC…			GO: Biological Process
GO: Biological Process	GO:0009967	positive regulation of signal transduction	10	ABCA7,ADAM8,ADAM9,ADCYAP1,ADORA1,ADORA3,ADRA1B,AKAP5,AKR1C2,ALK,ALOX15,ANGPT1,ANKRD17,ARFGEF1,ARHGAP4,ARL2BP,ARNTL,ARRB1,ATP2C1,ATP6AP1,ATP6AP2,AXIN2,BAG4,BANK1,BCAP31,BCL10,BDNF,BIK,BMP2,BMP3,BMP5,BMP8B,C1QTNF3,C3,CALM2,CASP10,CAT,CAV2,CBL,CC2D1A,CCL18,CCL2,CCL23,CCL5,CD180,CD226,CD28,CD44,CDH13,CDH2,CHN1,CHN2,CITED1,CITED2,CNTN2,COL3A1,COPS8,CRADD,CRK,CRLF1,CSPG4,CTBP2,CTF1,CX3CL1,CXCL10,CXCL11…			GO: Biological Process	GO:0016032	viral process	10	ABI1,ACKR3,APOBEC3B,APOBEC3D,ATG16L1,ATG7,BAD,BANF1,BAX,BNIP3L,BTRC,C1QBP,CAV1,CD55,CD86,CENPU,CFL1,CHMP4A,CHMP5,CLDN9,CLEC4G,CR2,CREB3,CRTC3,CUL1,CX3CR1,CXCL8,CXCR4,CXCR6,DDX11,DEK,DHX58,DPP4,DYNLL1,EIF3B,EIF3D,F11R,FCN1,FCN3,FKBP8,FURIN,GTF2F1,GYPA,HDAC1,HPN,HPX,HSPA8,HSPD1,HYAL2,IFITM2,IFITM3,IL6ST,ILF3,KARS,KDM4A,KPNA1,KPNB1,KRT18,KRT19,KRT7,LAMP3,LEF1,LTF,MITD1,MSH6,NECTIN4,NEDD4,NFKBIA,NUP5…			GO: Biological Process	GO:0043604	amide biosynthetic process	10	AARS,ADAR,AGO1,ARG2,ASNS,ATF4,ATP5IF1,BCL3,BTG2,CAD,CCL5,CERS2,CPEB2,CPS1,CYP1B1,DAPK1,DDX25,DICER1,DNAJC3,EEF2,EIF2AK2,EIF3B,EIF3D,EIF3H,EIF3I,EIF4A1,EIF4E3,EIF4G1,EIF4G3,ELAVL1,EP300,FAM129A,FMR1,FXR1,GAPDH,GCH1,GCLM,HNRNPA2B1,IGF2BP3,IL6,IREB2,KARS,KRT17,LARS,LRRC47,LSM14A,METTL17,MKNK2,MRPL12,MRPL32,MRPL34,MRPL48,MRPL51,MRPS15,MTHFD1L,NCBP2,NCOR1,NFKB1,NSMAF,OTC,PABPC4,PAIP2,PER2,PINK1,POLDIP…			GO: Biological Process	GO:0072358	cardiovascular system development	10	ACTN2,ACVRL1,ADAP2,ADGRA2,ADGRB1,ADIPOR2,ADRA1A,AHI1,AIMP1,AKAP13,ALPK3,ANG,ANGPT1,ANKRD17,ANKS6,ANTXR1,APOE,APOH,ARL13B,ATF2,BBS4,BCAS3,BMP10,BMPR1A,C3,C5,CAD,CCBE1,CCDC40,CCN1,CCNB1,CCR3,CDC42,CEACAM1,CIB1,CNTRL,COL4A2,COL4A3BP,CPE,CRKL,CTH,CTNNB1,CX3CR1,CXCL12,CXCL8,CYBB,DDIT3,DHRS3,DIPK2A,DNAAF4,DSG2,DVL3,E2F8,ECE1,EIF2AK3,ELK3,EMP2,ENG,EPAS1,EPHA2,EPHA3,EPHB4,ERBB3,EREG,ETS1,FGF10,FGF18,FGF2…			GO: Biological Process	GO:0048514	blood vessel morphogenesis	10	AAMP,ACKR3,ACVR1,ADAMTS1,ADGRB1,ADIPOR2,ADM,ADORA2B,ANPEP,APOB,APOD,AQP1,BAK1,C3,CAMP,CASP8,CAV1,CCBE1,CCR3,CEACAM1,CLIC4,COL15A1,COL3A1,CXCR2,CXCR4,CYP1B1,DLL4,EGF,ENPP2,EPHB2,ESM1,FBXW7,FGF1,FGF18,FGF8,FLNA,FLT1,GATA2,GNA13,GREM1,HBEGF,HDAC5,HIF1AN,HIPK2,HMGB1,HOXA1,HOXB13,HPSE,HSPG2,HTATIP2,IL18,IL6,ISL1,ITGAV,ITGB2,KLF4,KLF5,KLK3,KRIT1,KRT1,LAMA5,LGALS3,LRP1,LRP5,MCAM,MED1,MTDH,MYH9,NFE2L2,NG…			GO: Biological Process	GO:0060429	epithelium development	10	ABCA12,ACTL8,ACVR1,ACVR2B,AGR2,AJUBA,AKR1C1,AKR1C2,AKR1C3,ALOX12,ANXA4,ARHGAP24,ARID4B,ARL13B,ATP7A,BLOC1S6,CCN2,CCND1,CDH3,CDKN1A,CITED2,CLIC5,CYP26B1,DAAM1,DKK4,DMRT1,DNASE1L2,E2F8,EDN1,EDN3,EFNB2,EHF,EMP1,EPHA7,EREG,ERRFI1,FLRT3,FOXA1,FRMD6,GATA3,GNA13,GRHL2,GRSF1,H2AFY,HBEGF,HDAC2,HES1,HEY1,HEY2,HOXC13,ID1,ID2,IFNG,IGF1,IL13,IL6,JAK2,KITLG,KLHL3,KRAS,LFNG,LMO4,LRP5,LUZP1,MAF,MAPK1,MEOX1,MITF,…			GO: Biological Process	GO:0043523	regulation of neuron apoptotic process	10	AARS,ADAM8,AGAP2,AMBRA1,ATP7A,BAX,BDNF,BTG2,CDC34,CLN3,CRLF1,CTNNB1,DLX1,EGLN2,EN2,EPHA7,EPOR,G6PD,GCLC,GCLM,GRIK2,HDAC1,HDAC4,HIF1A,HRAS,HSP90AB1,HSPD1,HSPH1,HYOU1,IL1B,KCNIP3,KIF14,LIG4,MAP3K11,MAPK8,MCL1,NCF2,NF1,NONO,NRBP2,NTF4,OPTN,PARK7,PCP4,PCSK9,PDPK1,PINK1,PMAIP1,POU4F1,RETREG1,RHOA,SOD1,STAMBP,STXBP1,TOX3,TP53,TP63,TP73,UNC5B,VEGFB,ZPR1
GO: Biological Process	GO:1903530	regulation of secretion by cell	10	ADAM8,ADAM9,ADCYAP1,ADORA1,ADORA3,AIM2,ANGPT1,ANXA1,AP1G1,ARL2BP,ARNTL,ARRB1,ASIC1,ATG7,ATP6AP1,B4GALT1,BANK1,BCR,C1QTNF3,CACNA1E,CACNA1G,CACNA2D2,CADM1,CAMP,CCK,CCKAR,CCKBR,CCL5,CD2,CD34,CHRNA3,CHRNA4,CLTRN,CNR1,CPLX1,CPT1A,CRH,CX3CL1,DNM1L,DPYSL2,EDN2,EGF,EPHA5,FBLN1,FCER1G,FCN1,FGF23,FGFR4,FKBP1B,FLT3,GHSR,GLUD1,GLUL,GOLPH3L,GPER1,GPR39,GSDMD,HADH,HNF4A,HTR2A,HTR2C,ICA1,IFNAR1,IL11,IL17RB,IL1B…			GO: Biological Process	GO:0071705	nitrogen compound transport	10	ABCB1,ABCC8,ADCYAP1,ADORA2A,ADORA3,AGFG1,AGTR2,AOC1,APBA1,APLN,AQP10,ARL6IP1,ARRB1,ATG7,AVPR1A,BAD,BCL3,BDNF,BTK,C1QTNF3,CASR,CHRNA4,CHRNB2,CKAP5,CLN3,CLN8,COL4A3BP,CRHR2,CSF2,DDX19A,DPYSL2,DRD3,EIF5A2,ENSA,ENTPD1,ENY2,FGA,FGB,FLVCR1,FYTTD1,G3BP2,G6PC2,GHRHR,GHSR,GIP,GJB1,GLRX,GREM1,GRIN2B,GRM7,HDAC1,HMGN3,HNRNPA2B1,HPX,HTR6,IGF2BP1,IGF2BP2,IL18,IL18R1,IL1B,ILDR1,IRS1,IWS1,JAK2,KCNA2,KCNG2,KCNJ10…			GO: Biological Process	GO:0051235	maintenance of location	10	ABCG1,ACVR1C,ANGPTL3,ARL2BP,ATP7B,BBC3,BCL3,CACNA1C,CALM2,CAV1,CHD7,CREB3,CRY1,CXCL11,DAG1,DDIT3,DHRS7C,EHD1,ENPP1,EZR,F2,FBN1,FBN2,FLNA,FLNB,HK2,HSP90B1,HTR2B,IL6,ITPR1,ITPR2,ITPR3,JPH1,KDELR1,KDELR2,LGALS3,MYO5A,NFKB1,PDIA2,PDPK1,PINK1,PLCG2,PRKD1,S100A9,SIRT1,SLC30A4,STAT5A,SYNE2,TLN1,TLN2,TWF2,VPS13D			GO: Biological Process	GO:0000902	cell morphogenesis	10	ABCC4,ABL1,ABLIM3,ACHE,ACTN1,ACTN4,ADGRB1,AHI1,AKAP5,ALMS1,ANOS1,ANTXR1,ANXA7,APOE,ARHGAP15,ARHGAP4,ARL13B,ARL3,ATMIN,ATP2B2,AURKA,BBS1,BBS4,BCL2,BCL6,BIN3,BOC,CAMK2B,CASP9,CCDC40,CCL7,CCNO,CDC42,CDC42EP1,CDC42EP2,CDC42EP3,CDC7,CDH1,CDH11,CDK5R1,CENPJ,CEP83,CGN,CHL1,CHN1,CIB1,CLEC1B,COBL,COL4A3BP,CRABP2,CTNNB1,CUL3,CXCL12,CYFIP1,DAB1,DAB2,DACT3,DAG1,DBNL,DCLK1,DIAPH1,DISC1,DMRT1,DNAAF2,DNAAF4,DNA…			GO: Biological Process	GO:0035295	tube development	10	ACVR1,ADM,AGR2,AQP11,ARID1A,ARL13B,ASAH1,ATP6AP2,ATP7A,BAK1,BBS4,BCL2,BMPR2,CALB1,CASP8,CCBE1,CCKBR,CLIC4,CLMP,COBL,COL3A1,CP,CPS1,CTHRC1,CTSZ,CXCR2,CXCR4,DLL4,EDNRB,EGF,ENAH,EP300,FBXW7,FGF1,FGF18,FGF8,FGFR3,FLT1,FOXF2,GATA2,GDF11,GNA13,GREM1,GZF1,HDAC5,HECA,HECTD1,HEYL,HMGB1,HOXA1,HOXD13,IFT172,IGF1,KIF18A,KIT,KLF2,KLF5,KRAS,LAMA5,LRP5,LUZP1,MAN1A2,MAN2A1,MAPK1,MED1,MED12,MESP1,MET,MICAL2,MKS1,…			GO: Biological Process	GO:0001944	vasculature development	10	ACVR1,ACVR2B,ADAM8,AGGF1,ALOX12,ARHGAP24,ATP7A,CALCRL,CAMP,CCL5,CCN2,CCN3,CHI3L1,CITED2,CX3CL1,DAB2IP,DCN,E2F8,EDN1,EFNB2,ENPEP,EPC1,EPHB1,EPHB2,EREG,ERRFI1,FGF6,FGF9,GNA13,GPLD1,HBEGF,HES1,HEY1,HEY2,HMOX1,ID1,IFNG,IGF1,IL6,LEMD3,LRP5,LTBP1,LUZP1,MAPK1,MMP14,MMP21,NDNF,NFE2L2,NR2E1,NRXN1,PARVA,PCSK5,PDGFRA,PLXND1,PPP3R1,PRKX,PROP1,PTGIS,PTGS2,RSPO3,RTN4,S1PR1,SIRT1,SPINK5,STARD13,THBS2,TIPARP,TSP…			GO: Biological Process	GO:0001932	regulation of protein phosphorylation	10	ABL1,ACKR3,ACSL1,ADAM8,ADAM9,ADARB1,ADCY6,ADCYAP1,AGAP2,AJUBA,AKAP9,AKT1,ALOX12B,ALS2,APP,ARL6IP5,ARRB1,ARRB2,BAX,BCCIP,BDNF,BIRC7,BMP10,BMP15,BMP3,BMPR2,BNIP2,C1QTNF3,CACUL1,CALM2,CAMK2N1,CAMKK1,CAMKK2,CAV1,CCDC88A,CCN1,CCN2,CCNC,CCNL2,CCNT1,CCNY,CCR1,CD44,CD6,CDC6,CDH2,CDK10,CDK12,CDKN1C,CENPE,CEP85,CHI3L1,CLN3,CREBL2,CRK,CRLF1,CSF1R,CTDSP1,CTNNB1,CUL3,CX3CL1,CXCR4,DBF4B,DBNL,DDIT4,DIRAS1,DKK1,…			Cluster [0.134:2.367]
GO: Biological Process	GO:0016358	dendrite development	10	ABI2,ACSL4,ACTR3,AKAP5,ANKRD27,APP,BAIAP2,BDNF,BMP5,CDC20,CELSR2,CHRNA3,CIT,CUL7,CUX1,DBN1,DCC,DCDC2,DCLK1,DISC1,DSCAM,EPHA5,FLRT1,FYN,GRIN1,GRIP1,GSK3B,HDAC6,HNRNPK,IGSF9,IL1RAP,IL1RAPL1,KIAA0319,KLHL1,LPAR1,LRP4,MAP1B,MAPK6,MARCKS,MATN2,MCF2,MEF2C,MYO6,NRG1,NSMF,NTRK2,NUMBL,PAK2,PALM,PPP1R9A,PSEN1,PTPRD,PTPRF,RAP2A,ROBO1,SCARF1,SDC2,SEZ6,SGK1,SLC9A6,STRN,TMEM106B,TNIK,TRAPPC4,TRPC5,TULP1,ZMYND8			GO: Biological Process	GO:0045047	protein targeting to ER	10	CHMP4A,RPL10,RPL15,RPL17,RPL19,RPL22,RPL23,RPL27,RPL27A,RPL28,RPL3,RPL31,RPL32,RPL34,RPL35A,RPL36,RPL37,RPL5,RPL9,RPS12,RPS13,RPS14,RPS16,RPS19,RPS2,RPS21,RPS24,RPS26,RPS3,RPS5,RPS6,RPS7,RPS8,SEC61G,SRP14,SSR3,UBA52			GO: Biological Process	GO:0048514	blood vessel morphogenesis	10	ADGRA2,ANGPTL3,ATP5IF1,BTG1,CAV1,CCL24,CCL5,CD34,CHD7,COL4A1,CSPG4,CXCR4,CYP1B1,DCN,DICER1,E2F7,EFNA1,EFNB2,EMP2,EPHB4,ERAP1,FAP,FGF18,FLNA,GATA4,HAS2,HEG1,HES1,HIPK2,IL1A,IL6,JAK1,KDR,KLF4,KLF5,LAMA5,LEF1,LGALS3,LOXL2,LRP1,MEIS1,MRTFB,MYH9,MYO1E,MYOCD,NCL,NDNF,NEDD4,NGFR,NOTCH1,PDE3B,PDGFRB,PRKCB,PRKD1,RASA1,RNF213,RTN4,SHC1,SIRT1,SMAD7,SMARCA4,SPI1,SYNJ2BP,TGFBI,TGFBR2,TGFBR3,TWIST1,UNC5B,VAV3,…			GO: Biological Process	GO:0072359	circulatory system development	10	ACTN2,ACVRL1,ADAP2,ADGRA2,ADGRB1,ADIPOR2,ADRA1A,AHI1,AIMP1,AKAP13,ALPK3,ANG,ANGPT1,ANKRD17,ANKS6,ANTXR1,APOE,APOH,ARL13B,ATF2,BBS4,BCAS3,BMP10,BMPR1A,C3,C5,CAD,CCBE1,CCDC40,CCN1,CCNB1,CCR3,CDC42,CEACAM1,CIB1,CNTRL,COL4A2,COL4A3BP,CPE,CRKL,CTH,CTNNB1,CX3CR1,CXCL12,CXCL8,CYBB,DDIT3,DHRS3,DIPK2A,DNAAF4,DSG2,DVL3,E2F8,ECE1,EIF2AK3,ELK3,EMP2,ENG,EPAS1,EPHA2,EPHA3,EPHB4,ERBB3,EREG,ETS1,FGF10,FGF18,FGF2…			GO: Biological Process	GO:0072359	circulatory system development	10	AAMP,ACKR3,ACVR1,ADAMTS1,ADGRB1,ADIPOR2,ADM,ADORA2B,AKAP6,ANKRD17,ANPEP,AP1B1,AP2B1,APOB,APOD,AQP1,ARID1A,ARL13B,ATP7A,BAK1,BBS4,BMPR2,BVES,C3,CAMP,CASP8,CAV1,CCBE1,CCM2L,CCR3,CEACAM1,CHM,CLIC4,COL15A1,COL1A1,COL3A1,CPLANE1,CTH,CXCR2,CXCR4,CYP1B1,DCTN5,DIPK2A,DLL4,DSP,DYNC2H1,EGF,ENPP2,EP300,EPC1,EPHB2,ESM1,FADD,FBN1,FBXW7,FGF1,FGF12,FGF18,FGF8,FHL2,FLNA,FLT1,GATA2,GNA13,GNAQ,GPER1,GREM1,GYS1,HBE…			GO: Biological Process	GO:0033993	response to lipid	10	ABCG1,ABCG2,ACVR1,ADCY2,ADCY3,ADNP2,AKR1C2,AKR1C3,ALOX12,ATP2B1,BDKRB1,BRINP3,CATSPERB,CCL5,CCN2,CCND1,CD55,CDKN1A,CITED2,CNR2,CRHBP,CSF2,CXCL2,CYP26B1,CYP7A1,DAB2IP,DCN,DDX5,DUSP10,EDN1,ERRFI1,ESRRG,FOXA1,GABRB1,GATA3,GLRX,GNRH1,GPLD1,H2AFZ,HDAC2,HEY1,HMOX1,HNF4G,HNRNPM,IFNG,IGF1,IL13,IL23R,IL6,JAK2,KRAS,LDLR,LEFTY1,LMO3,LYN,MAPK1,MAPK8,MED14,MED30,MMP13,MMP14,MSTN,NCF2,NR1D2,NR1H4,NR1I3,NR2E1,N…			GO: Biological Process	GO:0010562	positive regulation of phosphorus metabolic process	10	ABL1,ACKR3,ACSL1,ADAM8,ADAM9,ADCY6,ADCYAP1,ADGRF5,ADM,AGAP2,AJUBA,AKAP12,AKAP9,AKT1,ALOX12B,ALS2,AMBRA1,ARL6IP5,ARRB1,ARRB2,BAD,BAX,BDNF,BIRC7,BMP10,BMP15,BMP3,BMPR2,BNIP2,C1QTNF3,CACUL1,CALM2,CAMKK1,CAMKK2,CAV1,CCDC88A,CCN1,CCN2,CCNC,CCNL2,CCNT1,CCNY,CCR1,CD44,CD6,CDC6,CDH2,CDK10,CENPE,CHI3L1,CHP2,CLN3,CREBL2,CRK,CRLF1,CSF1R,CTNNB1,CX3CL1,CXCR4,DBF4B,DBNL,DIRAS1,DSTYK,DUSP19,EIF4G3,EMP2,EPHA7,EP…			Category
GO: Biological Process	GO:0051130	positive regulation of cellular component organization	10	ABCA7,ABI2,ACTL6A,ACTN2,ACTR3,ADAM9,ADCYAP1,ADGRL3,AIM2,AKAP5,ALOX15,AMIGO2,ANGPT1,ANKRD27,ANXA1,ANXA13,ARHGEF16,ARPC1B,ARPC2,ARRB1,ASIC2,ATF1,ATP8A2,AUTS2,AVIL,AXIN2,BAG4,BAIAP2,BAIAP2L2,BCL9L,BCR,BDNF,BICD1,BIK,BMP2,BMP5,C2CD5,C3,C6orf89,CAND1,CAPG,CBL,CBLN1,CCK,CCL2,CD28,CD47,CDC20,CDC42EP1,CDC42EP4,CDH2,CDK9,CEMIP,CLSTN2,CLTRN,CNOT1,CNR1,COL16A1,CORO1A,CORO1B,CUL7,CUX1,CXCL13,CXCL9,CYBA,CYFIP…			GO: Biological Process	GO:0009967	positive regulation of signal transduction	10	ACKR3,ACTN4,ADCYAP1,ADGRV1,ADORA2A,ADORA3,AGAP2,AGTR2,AKAP13,AKAP6,AKT2,AR,ARRB1,ARRDC3,ATP5IF1,ATP6V1C2,AVPI1,BAD,BAMBI,BAX,BBC3,BDNF,BIRC2,BIRC3,BMP10,BMP2,BMP3,BMP4,BMP5,BMP8B,BMPR1B,BMPR2,C1QBP,C1QTNF2,C1QTNF3,C5AR2,CALR,CAMK2B,CAMK2D,CAV1,CCBE1,CCL20,CCL21,CCL25,CCL26,CCR1,CCR7,CD3E,CDKN1C,CDKN2AIP,CHI3L1,CHN2,CITED2,CNTN2,CRHR2,CRK,CSF2,CSNK1E,CXCL11,CXCR4,DAPK3,DHX58,DKK2,DRD3,DUSP5,DYNLL1…			GO: Biological Process	GO:0071363	cellular response to growth factor stimulus	10	ACVR1C,ADAM17,ADAMTS7,ADGRA2,ALPP,CAD,CAV1,CAV2,CCL5,CDKN1C,CHRDL1,CHRDL2,CPS1,DAB2,DCN,DOK5,DSTYK,EEF2,EHD1,EHD4,EP300,FBN1,FBN2,FGF18,FGF23,FOS,FSTL1,FSTL3,GATA4,GLG1,GRB10,HAS2,HES1,HIPK2,HNRNPM,HTRA1,IL6,KDM5B,KDR,KLF4,LEF1,LHX1,LIMS1,MCM7,MTMR4,MYOCD,MYOF,NCBP2,NEDD4,NEO1,NFKB1,NGFR,NOTCH1,NOTCH2,ONECUT2,PDE2A,PDE3A,PDGFRB,PDPK1,POLR2A,PRKCB,PRKCZ,PRKD1,PTBP1,PTPRK,RASA1,RBFOX2,RNF111,SHC1,S…			GO: Biological Process	GO:0051674	localization of cell	10	ABL1,ACTN4,ACVRL1,ADAM10,ADAM17,ADARB1,ADGRA2,ADORA3,AIMP1,AKT2,ALKBH1,ALOX15B,AMOTL1,ANG,ANGPT1,ANO6,APC2,APEX1,APOE,APOH,ARF4,ARHGAP4,ARHGEF39,ARHGEF5,ARL13B,ASAP3,ATOH8,BBS1,BBS4,BCAS3,BCL2,BIN3,BMP10,BRAT1,BTC,C16orf45,C5,C5AR2,CACNA1I,CBLL1,CCAR1,CCBE1,CCDC40,CCL7,CCN1,CCR3,CCR6,CDC42,CDH1,CDK5R1,CEACAM1,CEACAM6,CELSR1,CEMIP,CEND1,CGA,CHGA,CHL1,CIB1,CMKLR1,CREB3,CSK,CTNNB1,CUL3,CUZD1,CX3CR1,…			GO: Biological Process	GO:0051674	localization of cell	10	AAMP,ABHD6,ACVR1,ADAM9,ADARB1,ADCY3,ADORA3,AKT2,AOC3,APBB1,APBB2,APEX1,APOB,APOD,AQP1,ARHGAP5,ARHGEF5,ARID5B,ARL13B,ARPIN,ATP2B4,AXL,AZU1,BBS1,BBS4,BCL2,BMPR2,BVES,CAPN7,CAV1,CBLL1,CCBE1,CCDC141,CCK,CCL17,CCL25,CCL27,CCL7,CCR3,CCR4,CCR7,CCSAP,CD58,CD84,CDC42BPA,CEACAM1,CELSR2,CGA,CHGA,CLIC4,CNN2,COL1A1,COL3A1,CORO1B,CTHRC1,CXCL1,CXCL16,CXCL3,CXCR2,CXCR4,CYP19A1,CYP1B1,DAB2,DCLK1,DDX58,DEPDC1B,DLL…			GO: Biological Process	GO:0051094	positive regulation of developmental process	10	ACACB,ACVR1,ACVR2B,ADAM8,ADGRL3,AGGF1,AGR2,ALOX12,ANKRD27,APBB1,ATP8A2,BCL11A,BCL6,BLOC1S6,BNIP2,BRINP3,CAMP,CCL5,CCN2,CCND1,CDON,CEP120,CHI3L1,CITED2,CSF2,CX3CL1,CXCL2,CYLD,CYP26B1,DAB2IP,DCN,DMRT1,DPYSL3,ECT2,EDN1,EDN3,EFNB2,EPC1,EPHB1,EPHB2,FGB,FGF9,FLRT3,FOXA1,GATA3,GPRC5B,H2AFY,HDAC2,HES1,HEY1,HEY2,HLX,HMOX1,ID2,IFNG,IGF1,IL13,IL23R,IL2RA,IL5,IL6,JAK2,KITLG,KRAS,LCK,LIG4,LMO3,LRP5,LYN,MAPK8,…			GO: Biological Process	GO:0070997	neuron death	10	AARS,ABL1,ADAM8,AGAP2,AKT1,AMBRA1,APP,ATP7A,BAD,BAG5,BAX,BDNF,BTG2,CD34,CDC34,CLN3,CREB1,CRLF1,CSHL1,CTNNB1,DDIT4,DHCR24,DLX1,EGLN2,EN2,EPHA7,EPOR,G6PD,GCLC,GCLM,GHR,GRIK2,HDAC1,HDAC4,HIF1A,HRAS,HSP90AB1,HSPD1,HSPH1,HYOU1,IL13,IL1B,KCNIP3,KIF14,LIG4,MAP3K11,MAPK8,MAX,MCL1,MEOX2,NCF2,NF1,NONO,NRBP2,NTF4,OPTN,PARK7,PCP4,PCSK9,PDPK1,PINK1,PMAIP1,POU4F1,POU4F3,PTPN5,RETREG1,RHOA,SCN2A,SLC9A1,SOD1,STA…			GO: Biological Process
GO: Biological Process	GO:0000902	cell morphogenesis	10	ABCC4,ACTB,ACTR3,ADAM15,ADAM8,AKAP5,AKIP1,ALCAM,ANKRD27,ANXA1,APP,ARAP3,ARHGAP15,ARHGAP4,ARHGEF1,ARPC2,ATG7,ATL1,ATP8A2,AVIL,AXIN2,BAIAP2,BBOF1,BBS9,BCL11B,BCL9L,BDNF,BMP2,BMP5,C5orf30,CADM1,CAPZB,CASP3,CASP9,CC2D2A,CCDC113,CCK,CCKAR,CCL2,CDC42EP1,CDC42EP4,CDC42SE2,CDH11,CDH2,CELSR2,CEP41,CHN1,CHRNA3,CIT,CITED1,CLIC4,CLIC5,CLUAP1,CNTN2,CORO1A,CORO1B,CRYGB,CUL7,CUX1,CYFIP1,DBN1,DCC,DCDC2,DCLK1,DIS…			GO: Biological Process	GO:0051674	localization of cell	10	ACTN4,ADGRA2,ADGRL3,ADORA3,AGTR2,AIMP1,AKT2,ALX1,ANKS1A,ANXA3,AP1AR,ARF4,ARSB,ATP8A1,AVL9,B4GALT1,BAMBI,BAX,BDKRB1,BMP10,BMP2,BMP4,BMP5,BMPR2,BRK1,BTG1,C1QBP,C3AR1,C5AR2,CALCA,CALR,CAMK2D,CARMIL1,CAV1,CCAR1,CCBE1,CCDC88A,CCL20,CCL21,CCL25,CCL26,CCNYL1,CCR1,CCR4,CCR7,CCSAP,CD244,CD47,CEMIP,CFL1,CGA,CHL1,CITED2,CLDN7,CLN3,CNTN2,CORO1A,CREB3,CTNNA2,CX3CR1,CXCL1,CXCL11,CXCL13,CXCL8,CXCR2,CXCR4,CXCR5,…			GO: Biological Process	GO:0034504	protein localization to nucleus	10	ADAR,ARL2BP,BCL3,CAV2,CCT3,CCT7,CCT8,CD2AP,CREB3,CYLD,DAB2,DAG1,DDX58,EDAR,EP300,FLNA,HDGF,HES1,HNRNPM,HSP90AB1,HSPA8,IL6,IPO4,IPO5,IPO7,IPO8,KPNB1,LMNA,LZTS2,NUP205,NUP214,NUP54,NUP58,NUTF2,PARK7,PDE2A,PHIP,PLRG1,PRDX1,RASSF5,RPL23,SIN3A,SIRT1,SLC9A1,SNAI2,SPTBN1,STAT3,SULF2,SYNE2,TGFB3,TNPO3,TPR,TRIM29,TRPS1,TXNIP,UBR5,XBP1			GO: Biological Process	GO:0042493	response to drug	10	ABCA3,ABCB11,ABCC3,ABCC4,ABCC8,ABCG8,ACSL1,ADAM17,ADRA1A,ADSSL1,AIM2,AK4,ALDH1A1,ALDOB,AMH,APEX1,APOBEC1,ASIC2,ATP4A,ATP8B1,BCL2,BLMH,CAD,CCNB1,CCNO,CDH1,CDH3,CDK2,CDK9,CDKN2A,CHEK2,CPS1,CTNNB1,CYBB,CYP17A1,CYP1A1,CYP27B1,CYP2B6,CYP2E1,DAB1,DDC,DDIT3,DNMT1,DPEP1,DVL3,ECE1,F7,FOSL1,FYN,GAL,GATA6,GNA12,GPLD1,HDAC4,HMGA2,HMGCS1,HSD11B2,HTR2B,ICAM1,IL6,ITGA3,KCNC1,KCNE2,LCK,LCN2,LOX,LRP8,MAOB,MAT2A,M…			GO: Biological Process	GO:0001525	angiogenesis	10	AAMP,ACKR3,ACVR1,ADAMTS1,ADGRB1,ADIPOR2,ADM,ADORA2B,ANPEP,APOD,AQP1,BAK1,C3,CAMP,CASP8,CAV1,CCBE1,CCR3,CEACAM1,CLIC4,COL15A1,CXCR2,CXCR4,CYP1B1,DLL4,EGF,ENPP2,EPHB2,ESM1,FBXW7,FGF1,FGF18,FGF8,FLNA,FLT1,GATA2,GNA13,GREM1,HBEGF,HDAC5,HIPK2,HMGB1,HOXB13,HPSE,HSPG2,HTATIP2,IL18,IL6,ISL1,ITGAV,ITGB2,KLF4,KLF5,KLK3,KRIT1,KRT1,LAMA5,LGALS3,LRP5,MCAM,MED1,MTDH,MYH9,NFE2L2,NGFR,PGF,PIK3CG,PLXND1,POFUT1,PP…			GO: Biological Process	GO:0051093	negative regulation of developmental process	10	ABCG1,ADAMTS7,AMH,ANKRD2,AP1AR,APBB1,APP,ARF6,BBS12,BCL11A,BCL6,CCL17,CCN3,CCND1,CDH3,CNTN4,CTLA4,CXCL14,CYLD,DAB2IP,DCN,DKK4,DLX1,DLX2,DPYSL3,DUSP10,EPHA7,EPHB2,EREG,FOXA1,GATA3,GNRH1,GRHL2,HDAC2,HES1,HEY1,HEY2,HLX,HMGB3,ID1,ID2,IFNG,IFNL1,IGF1,IL13,IL6,INPP5F,ITM2C,KRAS,LFNG,LINGO1,LRP5,LYN,MAPK1,MSTN,MYCN,NFE2L2,NR2E1,NTM,OMG,PDCD4,PLAC8,PLK2,PRAME,PRDM6,PTPRG,RTN4,SEMA7A,SIRT1,SNAI1,SNAI2,SOC…			GO: Biological Process	GO:0042327	positive regulation of phosphorylation	10	ABL1,ACKR3,ACSL1,ADAM8,ADAM9,ADCY6,ADCYAP1,AGAP2,AJUBA,AKAP9,AKT1,ALOX12B,ALS2,AMBRA1,ARL6IP5,ARRB1,ARRB2,BAD,BAX,BDNF,BIRC7,BMP10,BMP15,BMP3,BMPR2,BNIP2,C1QTNF3,CACUL1,CALM2,CAMKK1,CAMKK2,CAV1,CCDC88A,CCN1,CCN2,CCNC,CCNL2,CCNT1,CCNY,CCR1,CD44,CD6,CDC6,CDH2,CDK10,CENPE,CHI3L1,CLN3,CREBL2,CRK,CRLF1,CSF1R,CTNNB1,CX3CL1,CXCR4,DBF4B,DBNL,DIRAS1,DSTYK,DUSP19,EIF4G3,EMP2,EPHA7,EPOR,ERBB2,EZH2,F2,FAM129…			GO: Biological Process
GO: Biological Process	GO:0072359	circulatory system development	10	ACTA2,ACTN2,ADAM15,ADAM19,ADAM8,ADAMTS6,ADRA1B,ANGPT1,ANKRD17,ANKS6,ANPEP,APOB,APOD,ARID1A,ATF2,ATG7,AXIN2,B4GALT1,BMP2,BTG1,C1GALT1,C3,CACYBP,CAD,CALCA,CAMP,CASP3,CC2D2A,CCL2,CCL5,CD34,CDH13,CDH2,CDH5,CDKL1,CHRNA3,CITED1,CITED2,CLIC4,CLUAP1,COL15A1,COL2A1,COL3A1,COL4A1,COL4A2,COL5A1,CSPG4,CTDP1,CUL7,CX3CL1,CXCL10,CXCL13,CXCL17,CXCL8,CXCR2,DCTN5,DHCR7,DKK1,DLL4,DNAAF4,DSG2,DUSP6,ECM1,EFNB2,EGF,EG…			GO: Biological Process	GO:0044419	interspecies interaction between organisms	10	ABI1,ACKR3,APOBEC3B,APOBEC3D,ATG16L1,ATG7,BAD,BANF1,BAX,BNIP3L,BTRC,C1QBP,CAMP,CAV1,CD55,CD86,CENPU,CFL1,CHMP4A,CHMP5,CLDN9,CLEC4G,CR2,CREB3,CRTC3,CUL1,CX3CR1,CXCL8,CXCR4,CXCR6,DDX11,DEK,DHX58,DPP4,DYNLL1,EIF3B,EIF3D,F11R,FCN1,FCN3,FKBP8,FURIN,GTF2F1,GYPA,HDAC1,HPN,HPX,HSPA8,HSPD1,HYAL2,IFITM2,IFITM3,IL6ST,ILF3,KARS,KDM4A,KPNA1,KPNB1,KRT18,KRT19,KRT7,LAMP3,LEF1,LTF,MITD1,MSH6,NECTIN4,NEDD4,NFKBIA…			GO: Biological Process	GO:0006886	intracellular protein transport	10	ADAR,AP2M1,AP3B1,AP3S1,ARFIP1,ARL6IP1,ATP5IF1,BCL3,C16orf70,CLIP1,COPA,CREB3,CSK,CYLD,DAB2,DAG1,DDX58,DYNLL1,EDAR,EDEM2,EHD1,EP300,ERBIN,EVI5L,FLNA,HERPUD1,HES1,HSP90AB1,HSP90B1,HSPA8,HUWE1,IFIT1,IL6,IPO4,IPO5,IPO7,IPO8,KDELR1,KDELR2,KPNB1,LCP1,LMAN1,LMNA,MARCKS,MFN2,MTX2,MYADM,NAGPA,NEDD4,NGFR,NPLOC4,NUP205,NUP214,NUP54,NUP58,NUTF2,OPTN,PARK7,PARL,PCNT,PDE2A,PDZK1,PEX6,PHIP,PINK1,PPP1R3C,PRDX1,P…			GO: Biological Process	GO:0022402	cell cycle process	10	ABL1,ABRAXAS2,ADAM17,AKAP8,AKT2,ALMS1,ANAPC10,ANAPC7,ANKLE2,ANKRD17,APEX1,ARL3,ARL8B,ATF2,ATF5,AURKA,AURKB,AURKC,BARD1,BBS4,BCL2,BCL2L11,BIN3,BIRC5,BRD4,BRINP2,BRIP1,BTC,BTG2,BUB1B,BUB3,CAB39L,CABLES1,CACUL1,CAMK2B,CASP2,CCNA2,CCNB1,CCNB1IP1,CCNY,CDC20,CDC23,CDC25B,CDC26,CDC42,CDC45,CDC7,CDCA3,CDCA8,CDK10,CDK2,CDK5R1,CDK9,CDKN2A,CDT1,CENPJ,CENPL,CENPN,CENPQ,CEP192,CEP57L1,CEP85,CETN2,CHEK2,CHMP1A…			GO: Biological Process	GO:0022603	regulation of anatomical structure morphogenesis	10	ADAM9,ADAMTS1,ADGRB1,ADM,ADNP,ADORA2B,ALDOA,ANXA7,AP2B1,AQP1,ARHGAP15,ARPIN,BBS4,BCL11A,BCL2,BMPR2,BVES,C3,CAMP,CAPRIN1,CASP6,CASZ1,CCBE1,CCL7,CCR3,CD53,CDKN2A,CEACAM1,CELSR2,CLTC,COL1A1,CORO1B,CSNK1D,CSNK1E,CTHRC1,CXCR2,CYLD,CYP1B1,DAB2,DLL4,DMP1,DMRT2,DPYSL2,EFNA5,EHD1,ENPP2,EP300,EPB41,EPB41L2,EPHB2,EPS8,EVI5,FBXW7,FEZF2,FGF1,FGF13,FGF18,FGF8,FGG,FLNA,FLT1,FMNL1,GAS7,GATA2,GCM1,GDF15,GNA13,GPC…			GO: Biological Process	GO:0045596	negative regulation of cell differentiation	10	ABCG1,ADAMTS7,ANKRD2,AP1AR,APBB1,APP,ARF6,BBS12,BCL11A,BCL6,CCL17,CCN3,CCND1,CNTN4,CTLA4,CXCL14,CYLD,DAB2IP,DLX1,DLX2,DPYSL3,DUSP10,EPHA7,EPHB2,EREG,FOXA1,GATA3,GNRH1,GRHL2,HDAC2,HES1,HEY1,HEY2,HLX,HMGB3,ID1,ID2,IFNG,IFNL1,IGF1,IL13,IL6,INPP5F,ITM2C,KRAS,LINGO1,LRP5,LYN,MAPK1,MSTN,MYCN,NFE2L2,NR2E1,NTM,OMG,PDCD4,PLK2,PRAME,PRDM6,PTPRG,RTN4,SEMA7A,SIRT1,SNAI1,SNAI2,SOD2,SPP1,TJP2,TRIM6,UCMA,USH2A,…			GO: Biological Process	GO:0060548	negative regulation of cell death	10	AARS,ABL1,ACKR3,ACTC1,ADAM8,ADCYAP1,ADNP2,AGAP2,AHI1,AKT1,ALMS1,AMBRA1,ANXA5,ARHGEF1,ARRB1,ARRB2,ASNS,ATAD3A,ATP7A,BAD,BAG5,BAX,BCL2A1,BDNF,BEX3,BIRC3,BIRC7,BLK,BMF,BNIP2,BNIP3L,BTG2,CAV1,CCN1,CCN2,CCN4,CCN5,CCN6,CD34,CD44,CIAPIN1,CLN3,CREB1,CREB3L1,CRLF1,CSF1R,CSHL1,CTNNB1,CTTN,CX3CL1,DAD1,DAPK1,DHCR24,DHRS2,DLX1,DUSP1,EEF2K,EIF2AK3,EN2,EPOR,ERBB2,FAIM,FHL2,FLT4,G2E3,GAS6,GCLC,GCLM,GHR,GLI3,GLRX…			GO: Biological Process
GO: Biological Process	GO:0051674	localization of cell	10	ABHD2,ABHD6,ABI2,ADAM10,ADAM15,ADAM8,ADAM9,ADGRL3,ADORA1,ADORA3,ANGPT1,ANXA1,APOB,APOD,ARAP3,ARHGAP4,ARHGAP5,ARHGDIB,ARHGEF16,ARPC2,ASTN1,ATP2B4,AVL9,B4GALT1,BAG4,BCR,BMP2,BMP5,BTG1,C5orf30,CACNA1E,CALCA,CAPN7,CATSPER3,CCK,CCKAR,CCL18,CCL2,CCL23,CCL5,CD2,CD2AP,CD34,CD44,CD47,CDH13,CDH2,CELSR2,CEMIP,CGA,CHST4,CITED2,CKLF,CLIC4,CLN3,CNR2,CNTN2,COL3A1,COL5A1,CORO1A,CORO1B,CSPG4,CX3CL1,CXCL10,CXCL11,…			GO: Biological Process	GO:0007169	transmembrane receptor protein tyrosine kinase signaling pathway	10	ABI1,ACTR3,ADGRA2,AGTR2,AKT2,ANGPTL1,ANKS1A,AP2M1,APH1A,APH1B,AR,ARF4,ARPC1A,ATP6V0B,ATP6V1A,ATP6V1C2,ATP6V1G1,ATXN1,BDNF,BMP2,BMP4,BMP5,BMPR2,BRK1,BTK,CCBE1,CD3E,CDC37,CISH,CRK,DDIT4,DOK2,EPHB3,ERRFI1,ESM1,ESRP1,ESRP2,FASLG,FES,FGF1,FGF12,FGF17,FGF18,FGF19,FGF21,FGF3,FGF5,FGFR3,FGR,FLRT1,FLRT2,FLRT3,FRS2,FSHR,GAB2,GALNT3,GFRA1,GHR,GHRHR,GHSR,GLRX,GPRC5A,GREM1,GRIN2B,GSK3A,GTF2F1,HBEGF,HNRNPM,HPN…			GO: Biological Process	GO:0090287	regulation of cellular response to growth factor stimulus	10	ADAM17,ADGRA2,CAV1,CAV2,CDKN1C,CHRDL1,CHRDL2,DAB2,DCN,DOK5,DSTYK,FBN1,FBN2,FGF18,FSTL3,GATA4,GLG1,GRB10,HES1,HIPK2,HTRA1,KDR,MTMR4,MYOCD,MYOF,NEDD4,NEO1,NGFR,NOTCH1,NOTCH2,ONECUT2,PDPK1,PRKCB,RNF111,SIRT1,SMAD7,SNX25,STRAP,SULF2,TGFB3,TGFBR2,TGFBR3,TRIM33,TWSG1,ULK1			GO: Biological Process	GO:0022603	regulation of anatomical structure morphogenesis	10	ABL1,ACHE,ACTN4,ACVRL1,ADGRA2,ADGRB1,AHI1,AKAP13,AKAP5,ANXA7,APOE,APOH,ARHGAP15,ARHGAP4,ARHGEF19,BBS4,BCL2,BCL6,BMP10,BMPR1A,BNIP3,C3,C5,CAMK1,CAMK2B,CASP6,CCBE1,CCL7,CCR3,CDC42,CDC42EP1,CDC42EP2,CDC42EP3,CDC7,CDH1,CDK5R1,CDKN2A,CDX1,CEACAM1,CELSR1,CENPJ,CHN1,CIB1,COL4A2,COL5A2,CPE,CRABP2,CTNNB1,CX3CR1,CXCL12,CXCL8,CYBB,CYFIP1,DAB1,DAB2,DACT3,DAG1,DIAPH1,DISC1,DMRT2,DMRT3,DVL3,EFNA5,EHD1,EMP2,ENA…			GO: Biological Process	GO:0001667	ameboidal-type cell migration	10	AAMP,ACVR1,ADAM9,AQP1,ARID5B,BMPR2,CAPN7,CCBE1,CEACAM1,CORO1B,CXCR4,CYP1B1,DLL4,EDNRB,ENPP2,FBXW7,FERMT1,FGF1,FGF18,FGF8,GAB2,GIPC1,GREM1,HBEGF,HDAC5,HMGB1,IL4,ISL1,ITGA4,ITGAV,ITGB2,KIT,KITLG,KLF4,KRIT1,KRT2,LAMA5,LRP5,MCC,MESP1,MET,MYH9,NFE2L2,NR2F2,PBLD,PIP5K1A,PLXND1,PRCP,PRKCE,PRKD1,PRSS3,PTEN,RFFL,RGCC,ROCK2,S100P,SASH1,SDC4,SEMA4A,SEMA4F,SEMA7A,SLC8A1,SNAI2,SOX8,SRPX2,STRAP,TAC1,TACR1,TEK,…			GO: Biological Process	GO:0001568	blood vessel development	10	ACVR1,ACVR2B,ADAM8,AGGF1,ALOX12,ARHGAP24,ATP7A,CALCRL,CAMP,CCL5,CCN2,CCN3,CHI3L1,CITED2,CX3CL1,DAB2IP,DCN,E2F8,EDN1,EFNB2,ENPEP,EPHB1,EPHB2,EREG,FGF6,FGF9,GNA13,GPLD1,HBEGF,HES1,HEY1,HEY2,HMOX1,ID1,IFNG,IL6,LEMD3,LRP5,LTBP1,LUZP1,MAPK1,MMP14,MMP21,NDNF,NFE2L2,NR2E1,NRXN1,PARVA,PCSK5,PDGFRA,PLXND1,PPP3R1,PRKX,PROP1,PTGIS,PTGS2,RSPO3,RTN4,S1PR1,SIRT1,SPINK5,STARD13,THBS2,TIPARP,TSPAN12,WNT2,ZBTB14			GO: Biological Process	GO:0031401	positive regulation of protein modification process	10	ABL1,ACKR3,ACSL1,ADAM8,ADAM9,ADCY6,ADCYAP1,AGAP2,AJUBA,AKAP9,AKT1,ALOX12B,ALS2,ARL6IP5,ARRB1,ARRB2,BAX,BDNF,BIRC3,BIRC7,BMI1,BMP10,BMP15,BMP3,BMPR2,BNIP2,C1QTNF3,CACUL1,CALM2,CAMKK1,CAMKK2,CAV1,CCDC88A,CCN1,CCN2,CCNC,CCNL2,CCNT1,CCNY,CCR1,CD44,CD6,CDC14B,CDC20,CDC23,CDC6,CDH2,CDK10,CENPE,CHI3L1,CHP2,CLN3,CREBL2,CRK,CRLF1,CSF1R,CTNNB1,CX3CL1,CXCR4,DBF4B,DBNL,DIRAS1,DMRTC2,DNAJB2,DNMT3B,DSTYK,DUSP1…			GO: Biological Process
GO: Biological Process	GO:0022603	regulation of anatomical structure morphogenesis	10	ACTR3,ADAM9,AKAP5,ANKRD27,ANXA1,ARAP3,ARHGAP15,ARHGAP4,ARHGEF1,ARPC2,AXIN2,B4GALT1,BAIAP2,BCL9L,BCR,BDNF,BMP2,BMP5,BTG1,C3,CAMP,CAPZB,CCL2,CCL5,CD34,CDC42EP1,CDC42EP4,CDC42SE2,CDH2,CELSR2,CHN1,CHRNA3,CIT,CITED1,CITED2,CLTC,CNTN2,COL4A2,COL5A1,COL5A2,CORO1A,CORO1B,CST3,CUL7,CUX1,CX3CL1,CXCL10,CXCL13,CXCL8,CXCL9,CXCR2,CYFIP1,DBN1,DCC,DCDC2,DDHD2,DISC1,DKK1,DKK4,DLL4,DNM1L,DPYSL2,DSCAM,DUSP6,ECM1,EF…			GO: Biological Process	GO:0015672	monovalent inorganic cation transport	10	ABCB1,ABCC8,ACTN2,ACTN4,ADCYAP1,ADORA2A,ADORA3,AKAP6,AKT2,ARF1,ATF4,ATP5F1C,ATP5MC2,ATP5MC3,ATP5MF,ATP6V0B,ATP6V1A,ATP6V1C2,ATP6V1G1,BTK,CAMK2D,CAV1,CHRNA4,CHRNB2,CNGA1,CNGA3,CNKSR3,CNNM4,COX4I1,COX4I2,COX7A2,COX7B,COX7B2,CRHR2,CSF2,DMAC2L,DMPK,DRD3,ENTPD1,FGF12,GALR2,GLRX,HPN,HTR6,IL4,KCNA1,KCNA2,KCNA4,KCNA7,KCNC1,KCND2,KCND3,KCNG2,KCNG4,KCNH3,KCNJ10,KCNJ13,KCNK12,KCNK17,KCNK4,KCNQ4,KCNS2,KCNS3,…			GO: Biological Process	GO:0080135	regulation of cellular response to stress	10	ATF4,ATP6V0A2,ATP6V1B1,ATP6V1C2,ATXN3,BBC3,BCL10,BCL2L11,BRD4,CAV1,CD34,CERS2,CREB3,CREBRF,CRY1,DAB2,DCN,DDIT3,DNAJB1,DNAJC3,DUSP10,DVL2,DYRK1A,EDAR,EDEM2,EIF2AK2,ENDOG,EP300,EZR,FIGN,FMR1,GAPDH,GCH1,HERPUD1,HIPK2,HMGA2,HSP90AB1,HSPA8,HYOU1,IL1A,IRAK1,KDM1A,KDR,KLF4,MAP3K20,MAP3K21,MAP3K3,MAP3K6,MAP3K9,NCOR1,NEDD4,NONO,NUP205,NUP210,NUP214,NUP54,NUP58,PARK7,PARL,PARPBP,PDIA2,PINK1,PLSCR1,PPEF2,PP…			GO: Biological Process	GO:0000278	mitotic cell cycle	10	AATF,ABL1,ABRAXAS2,ADAM17,AFAP1L2,AKAP8,ALMS1,ANAPC10,ANAPC7,ANKLE2,ANKRD17,APEX1,ARL8B,ATF2,AURKA,AURKB,AURKC,BBS4,BCL2,BIN3,BIRC5,BRD4,BRINP2,BTC,BTG2,BUB1B,BUB3,CABLES1,CACUL1,CAMK2B,CASP2,CCNA2,CCNB1,CCNY,CDC20,CDC23,CDC25B,CDC26,CDC42,CDC45,CDC7,CDCA3,CDCA8,CDK10,CDK2,CDK9,CDKN2A,CDT1,CENPJ,CENPN,CEP192,CEP57L1,CEP85,CETN2,CHEK2,CHMP1A,CHMP4B,CIB1,CKS2,CLTCL1,CNEP1R1,CNOT6L,CNTRL,CTNNB1,CUL3…			GO: Biological Process	GO:0090130	tissue migration	10	AAMP,ADAM9,AQP1,BMPR2,CAPN7,CCBE1,CEACAM1,CORO1B,CYP1B1,DLL4,ENPP2,FBXW7,FERMT1,FGF1,FGF18,FGF8,GAB2,GIPC1,GREM1,HBEGF,HDAC5,HMGB1,IL4,ITGAV,ITGB2,KIT,KLF4,KRIT1,KRT2,MCC,MET,MYH9,NFE2L2,NR2F2,PBLD,PLXND1,PRCP,PRKCE,PRKD1,PRSS3,PTEN,RGCC,ROCK2,S100P,SASH1,SEMA4A,SNAI2,SRPX2,STRAP,TAC1,TACR1,TEK,TGFBR1,VEGFC,VHL,ZC3H12A,ZEB2,ZNF580			GO: Biological Process	GO:0051674	localization of cell	5.97391	ACVR1,ADAM8,ADCY3,ADGRL3,ADORA3,AJUBA,AKAP4,ALOX12,AP1AR,APBB1,ARHGAP24,ARHGAP5,ARID5B,ARL13B,BAG4,BDKRB1,C5orf30,CCDC88A,CCL17,CCL23,CCL5,CCL7,CCN2,CCN3,CITED2,CNR2,CX3CL1,CXCL14,CXCL2,DAB2IP,DACH1,DCDC2,DCN,DMRT1,DPYSL3,EDN1,EDN2,EDN3,EFNB2,ENPEP,EPHB1,EPX,EREG,FERMT1,FGF19,FGF4,FLRT3,GATA3,GNA13,GNRH1,GPLD1,GPM6A,HAS1,HBEGF,HES1,HMOX1,HRH1,HTR2B,ID1,IFNG,IGF1,IGSF8,IL6,INPP5F,INSL6,JAK2,KITLG,…			GO: Biological Process	GO:0060284	regulation of cell development	10	ABL1,ACTR3,ADCY6,ADCYAP1,ADGRA2,AHI1,AKT1,ANKRD23,AP1AR,APP,ARHGAP4,ARHGEF1,ARNTL,ARPC2,BAD,BAG5,BAX,BDNF,BMP10,BMPR2,BNIP2,BRINP1,CARM1,CAV1,CCDC88A,CCN4,CDC20,CDH2,CHODL,CIT,CNOT3,COL14A1,COL1A1,CREB1,CSHL1,CTDSP1,CTNNB1,CTTN,CX3CL1,CXCR4,DBN1,DKK1,DLL4,DLX1,DNM2,DNMT3B,DUSP10,EEF2K,ELAVL1,ELAVL4,EPHA7,EPHB2,EPOR,ETV5,EZH2,F2,FGFR1,FKBP1B,FKBP4,FMOD,G6PD,GAL,GATA2,GCNT2,GDI1,GLI3,GPER1,GPRC5B,G…			GO: Biological Process
GO: Biological Process	GO:0032990	cell part morphogenesis	10	ABCC4,ACTB,ACTR3,AKAP5,ALCAM,ANKRD27,APP,ARHGAP4,ARHGEF1,ATG7,ATL1,ATP8A2,AVIL,BAIAP2,BBOF1,BBS9,BCL11B,BDNF,C5orf30,CC2D2A,CCDC113,CCK,CCKAR,CDH11,CDH2,CELSR2,CEP41,CHN1,CHRNA3,CIT,CLUAP1,CNTN2,CORO1B,CUL7,CUX1,CYFIP1,DBN1,DCC,DCDC2,DCLK1,DISC1,DLX5,DNAAF4,DNAAF5,DNAH1,DNM1L,DPYSL2,DPYSL5,DSCAM,ECM2,EFNA3,EFNA4,EFNB2,EIF2B2,ENPP2,EPHA5,ERBB2,ETV1,ETV4,EVL,EXT1,FBXO45,FEZ1,FEZ2,FGF13,FLNA,FLRT1,F…			GO: Biological Process	GO:0071495	cellular response to endogenous stimulus	10	AANAT,ACTN2,ADCY4,ADCYAP1,AGTR2,AKAP13,AKAP6,AKT2,AMHR2,AOC1,AR,ASS1,ATP6V0B,ATP6V1A,ATP6V1C2,ATP6V1G1,AVPR1A,BAD,BAMBI,BCL9,BDNF,BLM,BMP10,BMP2,BMP3,BMP4,BMP5,BMP8B,BMPR1B,BMPR2,CALCA,CALR,CAV1,CDH5,CDKN1C,CGA,CHRDL2,CHST11,CISH,CITED2,COL6A1,CORO1A,CPEB2,CRHR2,CRY2,CX3CR1,CXCL13,CXCL8,CYP11B1,CYP11B2,DCP1A,DDIT4,DKK1,DNAJA1,DNMT3A,EEF2,ELK1,ERRFI1,ESRP1,ESRP2,ESRRG,EZH2,F11R,FAM89B,FBN2,FGB,FGF…			GO: Biological Process	GO:0034976	response to endoplasmic reticulum stress	10	AARS,ACADVL,ASNS,ATF3,ATF4,ATF6,ATXN3,BBC3,BCL2L11,CAV1,CREB3,CREB3L2,CREBRF,DDIT3,DNAJB9,DNAJC3,EDEM2,EEF2,EIF2AK2,EP300,ERP44,FAM129A,HDGF,HERPUD1,HSP90B1,HYOU1,IGFBP1,ITPR1,LMNA,MARCH6,NPLOC4,PARK7,PARP16,PDIA2,PDIA4,PDIA5,SEC31A,SEL1L,SHC1,SIRT1,SPOP,TARDBP,TLN1,UBE2G2,UBE2K,UBE4B,UFM1,XBP1			GO: Biological Process	GO:0051270	regulation of cellular component movement	10	ABL1,ACTN1,ACTN4,ACVRL1,ADAM10,ADAM17,ADARB1,ADGRA2,ADORA3,AKT2,ALOX15B,AMOTL1,ANGPT1,ANO6,APEX1,APOE,APOH,ARHGAP4,ARHGEF39,ATOH8,ATP1A2,ATP2A2,BBS1,BBS4,BCAS3,BCL2,BCL6,BMP10,BTC,C16orf45,C5,C5AR2,CASQ2,CBLL1,CCAR1,CCBE1,CCDC40,CCL7,CCN1,CCR6,CDH1,CEACAM1,CEMIP,CGA,CHST3,CIB1,CMKLR1,CREB3,CX3CR1,CXCL12,CXCL2,CXCL3,CXCL8,CYP19A1,DAB2,DACH1,DAG1,DIAPH1,DOCK10,DPEP1,DPYSL3,DSG2,ELP5,EMP2,ENG,EPB41L…			GO: Biological Process	GO:2000145	regulation of cell motility	10	AAMP,ABHD6,ACVR1,ADAM9,ADARB1,ADORA3,AKT2,AOC3,APEX1,APOD,AQP1,ARHGAP5,ARPIN,BBS1,BBS4,BCL2,BMPR2,CAPN7,CBLL1,CCBE1,CCL25,CCL7,CCR7,CCSAP,CEACAM1,CGA,CLIC4,CNN2,COL1A1,COL3A1,CORO1B,CXCL1,CXCL16,CXCL3,CXCR2,CXCR4,CYP19A1,CYP1B1,DAB2,DDX58,DLL4,EGF,ELP1,ENPP2,F10,FADD,FBXW7,FGF1,FGF18,FLNA,FLT1,GAB2,GNA13,GPER1,GREM1,HBEGF,HDAC5,HMGB1,IGF1,IGFBP3,IL18,IL24,IL4,IL6,ITGA4,ITGAV,KIT,KITLG,KLF4,KLRK1,…			GO: Biological Process	GO:0048870	cell motility	5.97391	ACVR1,ADAM8,ADCY3,ADGRL3,ADORA3,AJUBA,AKAP4,ALOX12,AP1AR,APBB1,ARHGAP24,ARHGAP5,ARID5B,ARL13B,BAG4,BDKRB1,C5orf30,CCDC88A,CCL17,CCL23,CCL5,CCL7,CCN2,CCN3,CITED2,CNR2,CX3CL1,CXCL14,CXCL2,DAB2IP,DACH1,DCDC2,DCN,DMRT1,DPYSL3,EDN1,EDN2,EDN3,EFNB2,ENPEP,EPHB1,EPX,EREG,FERMT1,FGF19,FGF4,FLRT3,GATA3,GNA13,GNRH1,GPLD1,GPM6A,HAS1,HBEGF,HES1,HMOX1,HRH1,HTR2B,ID1,IFNG,IGF1,IGSF8,IL6,INPP5F,INSL6,JAK2,KITLG,…			GO: Biological Process	GO:1901214	regulation of neuron death	10	AARS,ABL1,ADAM8,AGAP2,AKT1,AMBRA1,ATP7A,BAD,BAX,BDNF,BTG2,CD34,CDC34,CLN3,CREB1,CRLF1,CSHL1,CTNNB1,DDIT4,DHCR24,DLX1,EGLN2,EN2,EPHA7,EPOR,G6PD,GCLC,GCLM,GHR,GRIK2,HDAC1,HDAC4,HIF1A,HRAS,HSP90AB1,HSPD1,HSPH1,HYOU1,IL13,IL1B,KCNIP3,KIF14,LIG4,MAP3K11,MAPK8,MCL1,NCF2,NF1,NONO,NRBP2,NTF4,OPTN,PARK7,PCP4,PCSK9,PDPK1,PINK1,PMAIP1,POU4F1,PTPN5,RETREG1,RHOA,SOD1,STAMBP,STXBP1,TOX3,TP53,TP63,TP73,TRPM2,UN…			GO: Biological Process
GO: Biological Process	GO:0007169	transmembrane receptor protein tyrosine kinase signaling pathway	10	ACTB,ACTR3,ADAM10,ADORA1,ALK,ANGPT1,APH1A,APH1B,APLP2,APOD,APP,ARPC1B,ARPC2,ATP6AP1,ATP6V0A1,ATP6V0A2,ATP6V1B2,BAIAP2,BAIAP2L2,BCR,BDNF,BMP2,BMP5,C2CD5,CASP3,CAV2,CBL,CCL2,CDH13,CHN1,CHRNA3,COL4A1,COL4A2,CRIM1,CRK,CSPG4,CYBA,CYFIP1,DDIT4,DDR2,DOK1,DOK2,DOK5,DUSP6,EFNA3,EFNA4,EFNB2,EGF,EPHA5,EPHA6,EPHB4,ERBB2,ERBB3,ERBB4,ESM1,ESR1,F7,FBXW7,FGF1,FGF19,FGF23,FGF3,FGFBP1,FGFR4,FIBP,FLRT1,FLRT3,FLT3,F…			GO: Biological Process	GO:0072599	establishment of protein localization to endoplasmic reticulum	10	CHMP4A,RAB10,RAB3GAP1,RPL10,RPL15,RPL17,RPL19,RPL22,RPL23,RPL27,RPL27A,RPL28,RPL3,RPL31,RPL32,RPL34,RPL35A,RPL36,RPL37,RPL5,RPL9,RPS12,RPS13,RPS14,RPS16,RPS19,RPS2,RPS21,RPS24,RPS26,RPS3,RPS5,RPS6,RPS7,RPS8,SEC61G,SRP14,SSR3,UBA52			GO: Biological Process	GO:0061024	membrane organization	10	AP2M1,ARF6,ARL6IP1,ATP11C,ATP5IF1,ATP8B3,BBC3,BCL2L11,BMF,C16orf70,CAV1,CAV2,CD59,CLIP1,CLTRN,CNTNAP2,COL5A1,CSK,CXCR4,DAB2,DLG3,DYNLL1,EMP2,EVI5L,EZR,FA2H,FLNA,GBF1,GBP1,GLRA3,GNPAT,GOLGA2,GPR158,HECTD1,HK2,HSPA8,IMMT,KCNIP4,LAMA5,LDLRAP1,LMAN1,LMNA,MAP7,MFN1,MFN2,MTCH1,MYADM,MYH9,MYO5A,MYOF,NDRG1,NEK9,NUMB,NUP205,NUP210,NUP214,NUP54,NUP58,OPTN,PDCD6IP,PDPK1,PDZK1,PINK1,PLSCR1,PPIL2,PPP6R3,PRKCB…			GO: Biological Process	GO:0016477	cell migration	10	ACTN4,ACVRL1,ADAM10,ADAM17,ADARB1,ADGRA2,ADORA3,AIMP1,AKT2,ALKBH1,ALOX15B,AMOTL1,ANG,ANGPT1,ANO6,APC2,APEX1,APOE,APOH,ARF4,ARHGAP4,ARHGEF39,ARHGEF5,ARL13B,ASAP3,ATOH8,BBS1,BBS4,BCAS3,BCL2,BIN3,BMP10,BRAT1,C16orf45,C5,C5AR2,CBLL1,CCAR1,CCBE1,CCL7,CCN1,CCR3,CCR6,CDC42,CDH1,CDK5R1,CEACAM1,CEACAM6,CELSR1,CEMIP,CEND1,CGA,CHGA,CHL1,CIB1,CMKLR1,CREB3,CSK,CTNNB1,CUL3,CUZD1,CX3CR1,CXCL12,CXCL2,CXCL3,CXCL8…			GO: Biological Process	GO:0010631	epithelial cell migration	10	AAMP,ADAM9,AQP1,BMPR2,CAPN7,CCBE1,CEACAM1,CORO1B,CYP1B1,DLL4,ENPP2,FBXW7,FERMT1,FGF1,FGF18,GAB2,GIPC1,GREM1,HBEGF,HDAC5,HMGB1,IL4,ITGAV,ITGB2,KIT,KLF4,KRIT1,KRT2,MCC,MET,MYH9,NFE2L2,NR2F2,PBLD,PLXND1,PRCP,PRKCE,PRKD1,PRSS3,PTEN,RGCC,ROCK2,S100P,SASH1,SEMA4A,SNAI2,SRPX2,STRAP,TAC1,TACR1,TEK,TGFBR1,VEGFC,VHL,ZC3H12A,ZEB2,ZNF580			GO: Biological Process	GO:0060284	regulation of cell development	5.92582	ANKRD27,AP1AR,APBB1,APP,ARF6,ATP8A2,BCL11A,BCL6,BNIP2,BRINP3,CCDC88A,CCL5,CDON,CHODL,CNTN4,CX3CL1,DAB2IP,DLX1,DLX2,DPYSL3,DUSP10,ECT2,EDN1,EPHA7,EPHB2,FBXO22,FGB,FOXA1,GATA3,GNRH1,GPRC5B,HDAC2,HES1,HEY1,HEY2,ID1,ID2,IFNG,IGF1,IL5,IL6,INPP5F,ITM2C,LIG4,LINGO1,LYN,LZTS1,MYCN,NCS1,NDNF,NET1,NFE2L2,NR2E1,NREP,NTM,OMG,PALM,PDE3A,PLK2,PLXND1,PTPRG,RAPGEF4,RET,RIMS1,RRN3,RTN4,S100A10,SDCBP,SDK1,SEMA7A,S…			GO: Biological Process	GO:0045937	positive regulation of phosphate metabolic process	10	ABL1,ACKR3,ACSL1,ADAM8,ADAM9,ADCY6,ADCYAP1,ADGRF5,ADM,AGAP2,AJUBA,AKAP12,AKAP9,AKT1,ALOX12B,ALS2,AMBRA1,ARL6IP5,ARRB1,ARRB2,BAD,BAX,BDNF,BIRC7,BMP10,BMP15,BMP3,BMPR2,BNIP2,C1QTNF3,CACUL1,CALM2,CAMKK1,CAMKK2,CAV1,CCDC88A,CCN1,CCN2,CCNC,CCNL2,CCNT1,CCNY,CCR1,CD44,CD6,CDC6,CDH2,CDK10,CENPE,CHI3L1,CHP2,CLN3,CREBL2,CRK,CRLF1,CSF1R,CTNNB1,CX3CL1,CXCR4,DBF4B,DBNL,DIRAS1,DSTYK,DUSP19,EIF4G3,EMP2,EPHA7,EP…			GO: Biological Process
GO: Biological Process	GO:0007409	axonogenesis	10	ACTB,ALCAM,APP,ARHGAP4,ARHGEF1,ATG7,ATL1,ATP8A2,BAIAP2,BCL11B,BDNF,CCK,CCKAR,CDH11,CDH2,CHN1,CNTN2,CYFIP1,DBN1,DCC,DCLK1,DISC1,DLX5,DPYSL2,DPYSL5,DSCAM,ECM2,EFNA3,EFNA4,EFNB2,EIF2B2,EPHA5,ERBB2,ETV1,ETV4,EVL,EXT1,FBXO45,FEZ1,FEZ2,FGF13,FLRT3,FMOD,FYN,FZD3,GDI1,GFRA3,GLI2,GPC1,GRIN1,GSK3B,HDAC6,HOXA1,ISL2,KIF26A,KIF26B,KIF5A,KRAS,L1CAM,LGI1,LRFN1,LRFN5,LRP4,LRRN1,LRRN2,LUM,MAG,MAP1B,MAP2K2,MATN2,M…			GO: Biological Process	GO:0006812	cation transport	10	ABCB1,ABCC8,ACTN2,ACTN4,ADCYAP1,ADORA2A,ADORA3,AKAP6,AKT2,ARF1,ATF4,ATP13A4,ATP5F1C,ATP5MC2,ATP5MC3,ATP5MF,ATP6V0B,ATP6V1A,ATP6V1C2,ATP6V1G1,ATP8A1,BAX,BBC3,BDKRB1,BMP4,BTK,CACNA1B,CACNG6,CALCA,CAMK2B,CAMK2D,CASQ1,CASR,CAV1,CCL21,CCR1,CCR7,CEMIP,CHRNA10,CHRNA2,CHRNA4,CHRNA5,CHRNA9,CHRNB2,CHRNB3,CLN3,CNGA1,CNGA3,CNKSR3,CNNM4,CORO1A,COX4I1,COX4I2,COX7A2,COX7B,COX7B2,CP,CREB3,CRHR2,CSF2,CXCL11,CXCR4…			GO: Biological Process	GO:0072358	cardiovascular system development	10	ADGRA2,AKAP13,ANGPTL3,ANKRD17,ARID1A,ARL13B,ATP5IF1,ATP7A,BASP1,BTG1,CACNA1C,CAD,CAV1,CCL24,CCL5,CCM2L,CD34,CHD7,COL4A1,COL5A1,CPLANE1,CRIP1,CSPG4,CXCR4,CYP1B1,DCN,DDIT3,DICER1,DSG2,DSP,DVL2,E2F7,EFNA1,EFNB2,EMP2,EP300,EPHB4,ERAP1,ERBB3,FAP,FBN1,FGF18,FLNA,FOXP4,GATA4,HAS2,HECTD1,HEG1,HES1,HIPK2,HNRNPU,HTR2B,IL1A,IL6,IRX4,JAK1,KCNQ1,KDR,KLF4,KLF5,LAMA5,LEF1,LGALS3,LMNA,LOX,LOXL2,LRP1,MAP3K3,MARCK…			GO: Biological Process	GO:0009790	embryo development	10	AATF,ACVRL1,ADAM10,AHI1,ALDH1A1,ALKBH1,ANGPT1,APBA3,ARL13B,ARNT2,ATOH8,ATP2B2,AXIN1,BBS4,BCL2L11,BIRC5,BMPR1A,C5,CCDC40,CCN1,CCNB1,CCNB1IP1,CDH1,CDK5R1,CDX1,CELSR1,CHRNA10,CHRNA9,CKS2,COBL,COL12A1,COL4A2,COL4A3BP,COL5A2,CRABP2,CSF2,CTNNB1,CUL3,CUL4A,CXCL8,CYP1A1,DAB2,DAG1,DDIT3,DLK1,DMRT2,DNAJA3,DNMT1,DUSP1,DUSP2,DUSP3,DVL3,E2F8,ECE1,EIF2S2,EIF4A3,ELF3,ELF5,EN1,EN2,ENAH,ENG,EPAS1,EPB41L5,EPHA2,ET…			GO: Biological Process	GO:0006897	endocytosis	10	ABCA1,ABCA7,ACKR3,ACKR4,ACTR2,ADM,AP1S1,AP2B1,APOB,APOC1,ARF6,ARHGAP21,ASGR1,ASGR2,ATP6V1H,AXL,AZU1,BCL2L1,BIN1,C3,CALCR,CANX,CAV1,CBLL1,CCR7,CD6,CD9,CEACAM1,CLEC4M,CLEC7A,CLIP3,CLTC,CLTCL1,CNN2,CSNK1D,CSNK1E,CXCL16,CXCR2,CYFIP2,DAB2,DNER,DPYSL2,EHD1,ENDOU,ENPP1,ENPP2,FCGR3A,FCN1,GAPVD1,GATA2,GREM1,GRIA1,HMGB1,HSP90B1,IGF2R,ITGA4,ITGAV,ITGB2,LDLRAD3,LDLRAP1,LGALS3,LIMK1,LMAN2,LRP1,LRP1B,LRP2,LRP5…			GO: Biological Process	GO:0001525	angiogenesis	5.90658	ACVR1,ADAM8,AGGF1,ALOX12,ARHGAP24,CALCRL,CAMP,CCL5,CCN2,CCN3,CHI3L1,CX3CL1,DAB2IP,DCN,E2F8,EDN1,EFNB2,ENPEP,EPHB1,EPHB2,EREG,FGF6,FGF9,GNA13,GPLD1,HBEGF,HEY1,HMOX1,ID1,IL6,LEMD3,LRP5,MMP14,NDNF,NFE2L2,NR2E1,NRXN1,PARVA,PDGFRA,PLXND1,PPP3R1,PRKX,PTGIS,PTGS2,RSPO3,RTN4,S1PR1,SIRT1,SPINK5,STARD13,THBS2,TSPAN12			GO: Biological Process	GO:0043069	negative regulation of programmed cell death	10	AARS,ABL1,ACKR3,ACTC1,ADAM8,ADCYAP1,AGAP2,AHI1,AKT1,ALMS1,AMBRA1,ANXA5,ARRB1,ARRB2,ASNS,ATAD3A,ATP7A,BAD,BAG5,BAX,BCL2A1,BDNF,BEX3,BIRC3,BIRC7,BLK,BMF,BNIP2,BNIP3L,BTG2,CAV1,CCN1,CD44,CIAPIN1,CLN3,CREB3L1,CRLF1,CSF1R,CTNNB1,CTTN,CX3CL1,DAD1,DAPK1,DHCR24,DHRS2,DLX1,DUSP1,EEF2K,EIF2AK3,EN2,EPOR,ERBB2,FAIM,FHL2,FLT4,G2E3,GAS6,GCLC,GCLM,GLI3,GLRX,GOLPH3,GREM1,GRIK2,HDAC1,HDAC2,HELLS,HIF1A,HK1,HRAS,HS…			Pathway
GO: Biological Process	GO:0044255	cellular lipid metabolic process	10	ABCA4,ABHD12,ABHD2,ABHD6,ACADVL,ACLY,ACOT2,ACOT7,ACP6,ACSL4,AGPAT3,AKR1C1,AKR1C2,ALDH3A2,ALDH8A1,ALG2,ALG8,ALG9,ALKBH7,ALOX15,AMACR,ANXA1,APOB,APOBR,APOD,ARSG,ASAH1,ASAH2,ATG7,B4GALT6,BCO1,BDH2,BPNT1,C3,CAT,CCKBR,CCNC,CD28,CD86,CDK8,CDS2,CERK,CLN3,CNR1,COQ2,CPT1A,CPT1B,CPT1C,CREM,CRH,CRYL1,CTSA,CYB5A,CYP2A13,CYP2E1,CYP2F1,CYP2J2,CYP2U1,DDHD2,DECR1,DGKE,DOLPP1,EDN2,EFR3A,EGF,EIF6,ELOVL7,ENPP2,ERBB…			GO: Biological Process	GO:0055085	transmembrane transport	10	ABCB1,ABCB4,ABCC8,ABCG1,ABCG4,ACTN2,ACTN4,ADAMTS8,AKAP6,AKT2,ANO4,AQP10,ARF1,ARHGEF9,ATP11C,ATP13A4,ATP5F1C,ATP5MC2,ATP5MC3,ATP5MF,ATP6V0B,ATP6V1A,ATP6V1C2,ATP6V1G1,ATP8A1,ATP8B2,BAX,BBC3,BCL2A1,BDKRB1,BMP4,CACNA1B,CACNG6,CAMK2D,CASQ1,CASR,CAV1,CCL21,CCR7,CEMIP,CHRNA10,CHRNA2,CHRNA4,CHRNA5,CHRNA9,CHRNB2,CHRNB3,CLCA4,CLCN2,CLIC3,CNGA1,CNGA3,CNIH2,CNIH3,CNKSR3,CNNM4,CORO1A,COX4I1,COX4I2,COX7A2,COX7…			GO: Biological Process	GO:0090288	negative regulation of cellular response to growth factor stimulus	10	ADAM17,ADGRA2,CAV1,CAV2,CHRDL1,CHRDL2,DCN,FBN1,FBN2,FSTL3,GLG1,HIPK2,HTRA1,MTMR4,NEDD4,NGFR,NOTCH1,ONECUT2,PDPK1,SIRT1,SMAD7,SNX25,STRAP,SULF2,TGFB3,TGFBR2,TGFBR3,TRIM33,TWSG1			GO: Biological Process	GO:0001944	vasculature development	10	ACVRL1,ADGRA2,ADGRB1,ADIPOR2,AIMP1,ANG,ANGPT1,ANKRD17,ANTXR1,APOE,APOH,BCAS3,C3,C5,CCBE1,CCN1,CCR3,CDC42,CEACAM1,CIB1,CNTRL,COL4A2,CRKL,CTH,CTNNB1,CX3CR1,CXCL12,CXCL8,CYBB,DDIT3,E2F8,EIF2AK3,ELK3,EMP2,ENG,EPAS1,EPHA2,EPHB4,EREG,ETS1,FGF10,FGF18,FGF6,FGFR1,FMNL3,FOSL1,FOXF1,FOXO1,FZD5,GATA6,GLI3,GNA13,GPLD1,HECTD1,HEY2,HIF3A,HIPK1,HMOX1,HRG,HSPB1,ID1,IHH,IL1A,IL6,KIT,KLK3,KRT1,LAMA1,LAMA4,LAMA5,LE…			GO: Biological Process	GO:0009725	response to hormone	10	AACS,ABCC2,ABCG1,ABCG2,ACVR1,ADAM9,ADAMTS1,ADCY3,ADCY4,ADCY6,ADCY7,ADCYAP1,ADCYAP1R1,ADIPOR2,ADM,AKR1C1,AKR1C2,AKR1C3,AKT2,APEX1,APOB,APOBEC1,AQP1,ARID1A,ARNT2,ASH2L,ATP2B1,ATP6V0A1,ATP6V1B1,ATP6V1H,AVPR1B,AVPR2,BAIAP2L1,BBS4,BCL2,BID,BUD31,C3,CACNA1B,CALCR,CALM1,CASP8,CASP9,CAV1,CCR7,CD4,CEACAM1,CGA,COL1A1,CPEB2,CPS1,CRHBP,CRYAB,CTSL,CYP11B1,DAB2,DNMT3A,DUSP1,EFNA5,ENPP1,EP300,ESRRG,FBN1,FHL2,FK…			GO: Biological Process	GO:0072358	cardiovascular system development	5.88039	ACACB,ACADM,ACVR1,ACVR2B,ADAM8,AGGF1,ALOX12,ARHGAP24,ARL13B,ATP7A,CACNA1C,CALCRL,CAMP,CCL5,CCN2,CCN3,CHI3L1,CITED2,COL11A1,CX3CL1,DAB2IP,DCN,E2F8,EDN1,EFNB2,ENPEP,EPC1,EPHB1,EPHB2,EREG,ERRFI1,FGF19,FGF6,FGF9,FHOD3,FLRT3,GATA3,GNA13,GPLD1,GRHL2,HBEGF,HDAC2,HES1,HEY1,HEY2,HMOX1,HTR2B,ID1,ID2,IFNG,IGF1,IL6,LEFTY1,LEMD3,LMO4,LRP5,LTBP1,LUZP1,MAPK1,MEF2A,MMP13,MMP14,MMP21,NDNF,NFE2L2,NPY2R,NR2E1,NRXN1…			GO: Biological Process	GO:0032989	cellular component morphogenesis	10	ABL1,ACTA1,ACTC1,ACTG1,ACTR3,ADAM8,AHI1,ALMS1,ALS2,ANKRD23,AP1AR,APP,ARAP1,ARAP3,ARHGAP15,ARHGAP18,ARHGAP4,ARHGEF1,ARL13B,ARPC2,ATP7A,ATXN10,B3GNT2,BAX,BBS2,BBS7,BDNF,BIN3,BMP10,BMPR2,BTBD3,C5orf30,CCDC113,CCNO,CD9,CDC14A,CDC42EP2,CDH2,CELSR2,CEP131,CEP135,CEP164,CEP83,CFAP410,CFAP53,CIT,CLIC4,CLUAP1,CNTNAP1,COL18A1,COL1A1,COL25A1,COQ7,CPLANE2,CREB1,CSF1R,CSNK1E,CSNK1G2,CTNNB1,CTTN,CUL3,CXCR4,CYL…
GO: Biological Process	GO:0006082	organic acid metabolic process	10	AARS,AASS,ABCB11,ABCG2,ABHD12,ACADVL,ACLY,ACO1,ACOT2,ACOT7,ACSL4,ADI1,AGMAT,AHCY,AKR1C1,AKR1C2,ALDH18A1,ALDH3A2,ALDH4A1,ALDH6A1,ALDH8A1,ALDOC,ALKBH7,ALOX15,AMACR,ANGPT1,ANXA1,AS3MT,ASNS,ASRGL1,ATF4,ATG7,ATP2B4,AUH,B3GAT1,B3GAT3,B3GNT7,B4GALT1,B4GALT6,BBOX1,BCKDHB,BDH2,BPGM,BPHL,BPNT1,BTD,C3,CAD,CARNS1,CARS,CBFA2T3,CBS,CHPF,CHST7,CLN3,CNDP2,CNR1,COMT,CPT1A,CPT1B,CPT1C,CREM,CRTAP,CRYL1,CSPG4,CTPS2,…			GO: Biological Process	GO:0006613	cotranslational protein targeting to membrane	10	ARL6IP1,RPL10,RPL15,RPL17,RPL19,RPL22,RPL23,RPL27,RPL27A,RPL28,RPL3,RPL31,RPL32,RPL34,RPL35A,RPL36,RPL37,RPL5,RPL9,RPS12,RPS13,RPS14,RPS16,RPS19,RPS2,RPS21,RPS24,RPS26,RPS3,RPS5,RPS6,RPS7,RPS8,SRP14,SSR1,SSR2,SSR3,TRAM1,UBA52			GO: Biological Process	GO:0009968	negative regulation of signal transduction	10	ADAM17,ADAR,ADGRA2,AP2M1,ATF3,BMF,CALM2,CARD19,CAV1,CAV2,CAVIN3,CCL5,CHD8,CHRDL1,CHRDL2,CLOCK,CREB3,CREBRF,CRY1,CRYBA1,CSK,CTNNA1,CXXC4,CYLD,DAB1,DAB2,DAG1,DAPK1,DCN,DDIT3,DUSP10,DUSP8,DVL2,DYRK1A,ENPP1,ERBB3,ERBIN,EZR,FBN1,FBN2,FOXP1,FSTL3,FZD6,G2E3,GBP1,GCLM,GDPD5,GLG1,GRB10,HERPUD1,HIPK2,HMGB2,HTR2B,HTRA1,HYOU1,IGFBP1,IL1A,ITPR1,KANK2,KDM1A,KLF4,LATS2,LEF1,LGALS3,LMNA,LPXN,LRP1,LRRTM1,LZTS2,MC…			GO: Biological Process	GO:0048870	cell motility	10	ABL1,ACTN4,ACVRL1,ADAM10,ADAM17,ADARB1,ADGRA2,ADORA3,AIMP1,AKT2,ALKBH1,ALOX15B,AMOTL1,ANG,ANGPT1,ANO6,APC2,APEX1,APOE,APOH,ARF4,ARHGAP4,ARHGEF39,ARHGEF5,ARL13B,ASAP3,ATOH8,BBS1,BBS4,BCAS3,BCL2,BIN3,BMP10,BRAT1,BTC,C16orf45,C5,C5AR2,CACNA1I,CBLL1,CCAR1,CCBE1,CCDC40,CCL7,CCN1,CCR3,CCR6,CDC42,CDH1,CDK5R1,CEACAM1,CEACAM6,CELSR1,CEMIP,CEND1,CGA,CHGA,CHL1,CIB1,CMKLR1,CREB3,CSK,CTNNB1,CUL3,CUZD1,CX3CR1,…			GO: Biological Process	GO:0051270	regulation of cellular component movement	10	AAMP,ABHD6,ACVR1,ADAM9,ADARB1,ADORA3,AKAP6,AKT2,AOC3,APEX1,APOD,AQP1,ARHGAP5,ARPIN,BBS1,BBS4,BCL2,BMPR2,CAPN7,CASQ2,CAV1,CBLL1,CCBE1,CCL25,CCL7,CCR7,CCSAP,CEACAM1,CGA,CLIC4,CNN2,COL1A1,COL3A1,CORO1B,CXCL1,CXCL16,CXCL3,CXCR2,CXCR4,CYP19A1,CYP1B1,DAB2,DDX58,DLL4,DSC2,DSP,EGF,ELP1,ENPP2,F10,FADD,FBXW7,FEZF2,FGF1,FGF18,FLNA,FLT1,GAB2,GNA13,GPER1,GREM1,HBEGF,HDAC5,HMGB1,IGF1,IGFBP3,IL18,IL24,IL4,IL6,I…			GO: Biological Process	GO:0072359	circulatory system development	5.88039	ACACB,ACADM,ACVR1,ACVR2B,ADAM8,AGGF1,ALOX12,ARHGAP24,ARL13B,ATP7A,CACNA1C,CALCRL,CAMP,CCL5,CCN2,CCN3,CHI3L1,CITED2,COL11A1,CX3CL1,DAB2IP,DCN,E2F8,EDN1,EFNB2,ENPEP,EPC1,EPHB1,EPHB2,EREG,ERRFI1,FGF19,FGF6,FGF9,FHOD3,FLRT3,GATA3,GNA13,GPLD1,GRHL2,HBEGF,HDAC2,HES1,HEY1,HEY2,HMOX1,HTR2B,ID1,ID2,IFNG,IGF1,IL6,LEFTY1,LEMD3,LMO4,LRP5,LTBP1,LUZP1,MAPK1,MEF2A,MMP13,MMP14,MMP21,NDNF,NFE2L2,NPY2R,NR2E1,NRXN1…			GO: Biological Process	GO:0007010	cytoskeleton organization	10	ABL1,ACTA1,ACTC1,ACTG1,ACTR3,ACTR3B,AGAP2,AKAP9,AKT1,ALMS1,ANKRD23,AP1AR,ARAP1,ARAP3,ARFIP2,ARHGAP17,ARHGAP18,ARHGAP26,ARHGAP4,ARHGDIB,ARHGEF17,ARHGEF19,ARPC1B,ARPC2,ARRB1,ASAP3,BAIAP2L2,BBS2,BICD2,BIN3,BIRC3,BIRC7,BLK,BMP10,BNIP2,CAMSAP2,CAV1,CCDC155,CCDC88A,CCN2,CDC14A,CDC42EP2,CENPA,CENPE,CEP131,CEP135,CEP85,CFAP410,CIT,CLIC4,CLIP1,CLN3,CLUAP1,CNTNAP1,CORO7,CRK,CROCC,CSF1R,CTNNB1,CTSV,CTTN,CUL…			Cluster [-0.344:-0.046]
GO: Biological Process	GO:0048858	cell projection morphogenesis	10	ABCC4,ACTB,ACTR3,AKAP5,ALCAM,ANKRD27,APP,ARHGAP4,ARHGEF1,ATG7,ATL1,ATP8A2,AVIL,BAIAP2,BBOF1,BBS9,BCL11B,BDNF,C5orf30,CC2D2A,CCDC113,CCK,CCKAR,CDH11,CDH2,CELSR2,CEP41,CHN1,CHRNA3,CIT,CLUAP1,CNTN2,CORO1B,CUL7,CUX1,CYFIP1,DBN1,DCC,DCDC2,DCLK1,DISC1,DLX5,DNAAF4,DNAAF5,DNAH1,DPYSL2,DPYSL5,DSCAM,ECM2,EFNA3,EFNA4,EFNB2,EIF2B2,ENPP2,EPHA5,ERBB2,ETV1,ETV4,EVL,EXT1,FBXO45,FEZ1,FEZ2,FGF13,FLNA,FLRT1,FLRT3,F…			GO: Biological Process	GO:0006614	SRP-dependent cotranslational protein targeting to membrane	10	RPL10,RPL15,RPL17,RPL19,RPL22,RPL23,RPL27,RPL27A,RPL28,RPL3,RPL31,RPL32,RPL34,RPL35A,RPL36,RPL37,RPL5,RPL9,RPS12,RPS13,RPS14,RPS16,RPS19,RPS2,RPS21,RPS24,RPS26,RPS3,RPS5,RPS6,RPS7,RPS8,SRP14,SSR3,UBA52			GO: Biological Process	GO:0019083	viral transcription	10	CCL5,CCNT1,EP300,HMGA2,IFITM3,LEF1,NOTCH1,NUP205,NUP210,NUP214,NUP54,NUP58,POLR2A,RPL13,RPL19,RPL23,RPL27,RPL27A,RPL3,RPL30,RPL31,RPL32,RPL37,RPL9,RPLP1,RPS12,RPS14,RPS19,RPS26,RPS6,RPS7,SMARCA4,TARDBP,TPR			GO: Biological Process	GO:0001568	blood vessel development	10	ACVRL1,ADGRA2,ADGRB1,ADIPOR2,AIMP1,ANG,ANGPT1,ANKRD17,ANTXR1,APOE,APOH,BCAS3,C3,C5,CCBE1,CCN1,CCR3,CDC42,CEACAM1,CIB1,CNTRL,COL4A2,CRKL,CTNNB1,CX3CR1,CXCL12,CXCL8,CYBB,DDIT3,E2F8,EIF2AK3,ELK3,EMP2,ENG,EPAS1,EPHA2,EPHB4,EREG,ETS1,FGF10,FGF18,FGF6,FGFR1,FMNL3,FOSL1,FOXF1,FOXO1,FZD5,GATA6,GLI3,GNA13,GPLD1,HECTD1,HEY2,HIF3A,HIPK1,HMOX1,HRG,HSPB1,ID1,IHH,IL1A,IL6,KLK3,KRT1,LAMA1,LAMA4,LAMA5,LEMD3,LIF,…			GO: Biological Process	GO:0016477	cell migration	10	AAMP,ABHD6,ACVR1,ADAM9,ADARB1,ADORA3,AKT2,AOC3,APBB1,APBB2,APEX1,APOB,APOD,AQP1,ARHGAP5,ARHGEF5,ARID5B,ARL13B,ARPIN,AXL,AZU1,BBS1,BBS4,BCL2,BMPR2,BVES,CAPN7,CAV1,CBLL1,CCBE1,CCDC141,CCK,CCL17,CCL25,CCL27,CCL7,CCR3,CCR4,CCR7,CD58,CD84,CDC42BPA,CEACAM1,CELSR2,CGA,CHGA,CLIC4,CNN2,COL1A1,COL3A1,CORO1B,CTHRC1,CXCL1,CXCL16,CXCL3,CXCR2,CXCR4,CYP19A1,CYP1B1,DAB2,DCLK1,DDX58,DEPDC1B,DLL4,DNER,EDNRB,ELP1,E…			GO: Biological Process	GO:0050767	regulation of neurogenesis	5.7948	ANKRD27,APBB1,APP,ARF6,ATP8A2,BCL11A,BCL6,BNIP2,BRINP3,CCDC88A,CCL5,CDON,CHODL,CNTN4,CX3CL1,DAB2IP,DLX1,DLX2,DPYSL3,DUSP10,ECT2,EPHA7,EPHB2,FOXA1,GATA3,GNRH1,GPRC5B,HDAC2,HES1,HEY1,HEY2,ID1,ID2,IFNG,IL6,INPP5F,ITM2C,LIG4,LINGO1,LYN,LZTS1,MYCN,NCS1,NDNF,NFE2L2,NR2E1,NREP,NTM,OMG,PALM,PLK2,PLXND1,PTPRG,RAPGEF4,RET,RIMS1,RRN3,RTN4,SDK1,SEMA7A,SERPINE2,SHTN1,SIRT1,SLC45A3,SLIT3,SMURF1,SOCS2,SPP1,SSH2…			GO: Biological Process	GO:0071495	cellular response to endogenous stimulus	10	AANAT,ABL1,ACSL1,ACVR1C,ADAM9,ADCY6,ADCYAP1,AHCYL1,AKAP9,AKT1,ANXA5,APP,APPL1,ARNTL,ARRB2,ASNS,ATP1A1,ATP6V0D2,ATP6V1A,ATP6V1B1,ATP6V1E2,BAD,BAIAP2L2,BBS2,BCL9,BDNF,BMP10,BMP15,BMP3,BMPR2,BPTF,CAD,CARM1,CAV1,CBX3,CCN1,CCN2,CD44,CD9,CDC6,CDKN1C,CNOT9,COL1A1,CREB1,CRY1,CSHL1,CTNNB1,CUZD1,CXCL13,DAND5,DDC,DDIT4,DIAPH1,DKK1,DLL4,DNM2,DNMT3A,DNMT3B,DSG4,DSTYK,DUSP1,ECSIT,EEF2,EEF2K,EGLN2,EHD1,EME1,ESR…			Category
GO: Biological Process	GO:1901698	response to nitrogen compound	10	AARS,ABCG2,ACTN2,ADCY7,ADGRL3,ADRA1B,AKAP5,AKAP7,ANXA1,AOC1,APP,APRT,ASNS,ATP2B4,ATP6AP1,ATP6V0A1,ATP6V0A2,ATP6V1B2,ATP7B,AVPR2,BAIAP2,BAIAP2L2,BCDIN3D,BLM,C2CD5,CACYBP,CAD,CALM2,CASP3,CASQ2,CASTOR1,CAT,CAV2,CBS,CCL2,CCL5,CCND1,CDC5L,CDK2,CHRNA1,CHRNA2,CHRNA3,CHRNA4,CHRNB1,CIB2,CITED1,CNR1,CNR2,COL16A1,COL3A1,COL4A1,COL5A2,CREM,CRH,CTSB,CYBA,CYP27B1,CYP2E1,DDX58,DNMT3A,DPYSL2,EGLN1,EIF2B2,EIF6,ES…			GO: Biological Process	GO:0006612	protein targeting to membrane	10	AKT2,ARL6IP1,ATG3,ATG4C,CEMIP,CHMP4A,DUSP18,EHD3,NKD2,OGA,OGT,RAB8B,RABGEF1,RPL10,RPL15,RPL17,RPL19,RPL22,RPL23,RPL27,RPL27A,RPL28,RPL3,RPL31,RPL32,RPL34,RPL35A,RPL36,RPL37,RPL5,RPL9,RPS12,RPS13,RPS14,RPS16,RPS19,RPS2,RPS21,RPS24,RPS26,RPS3,RPS5,RPS6,RPS7,RPS8,RTP3,SRP14,SSR1,SSR2,SSR3,TRAM1,UBA52			GO: Biological Process	GO:0006412	translation	10	AARS,ADAR,AGO1,ATF4,BCL3,BTG2,CCL5,CPEB2,CYP1B1,DAPK1,DDX25,DICER1,DNAJC3,EEF2,EIF2AK2,EIF3B,EIF3D,EIF3H,EIF3I,EIF4A1,EIF4E3,EIF4G1,EIF4G3,ELAVL1,EP300,FAM129A,FMR1,FXR1,GAPDH,HNRNPA2B1,IGF2BP3,IL6,IREB2,KARS,KRT17,LARS,LRRC47,LSM14A,METTL17,MKNK2,MRPL12,MRPL32,MRPL34,MRPL48,MRPL51,MRPS15,NCBP2,NCOR1,NFKB1,PABPC4,PAIP2,PER2,PINK1,POLDIP3,PPA1,PPP1CA,PTBP1,PYM1,RPL13,RPL19,RPL23,RPL27,RPL27A,RPL3,…			GO: Biological Process	GO:0032989	cellular component morphogenesis	10	ABCC4,ABL1,ABLIM3,ACHE,ACTA1,ACTN1,ACTN2,ACTN4,ADGRB1,AHI1,AKAP13,AKAP5,ALMS1,ANOS1,ANTXR1,ANXA7,APOE,ARHGAP15,ARHGAP4,ARL13B,ARL3,ATMIN,ATP2B2,AURKA,BBS1,BBS4,BCL2,BCL6,BIN3,BMP10,BOC,CAMK2B,CASP9,CASQ1,CASQ2,CCDC40,CCL7,CCNO,CDC42,CDC42EP1,CDC42EP2,CDC42EP3,CDC7,CDH1,CDH11,CDK5R1,CENPJ,CEP83,CGN,CHL1,CHN1,CIB1,CLEC1B,COBL,COL4A3BP,CRABP2,CTNNB1,CUL3,CXCL12,CYFIP1,DAB1,DAB2,DACT3,DAG1,DBNL,DCLK1…			GO: Biological Process	GO:0014070	response to organic cyclic compound	10	AACS,ABAT,ABCA1,ABCC2,ABCD3,ABCG2,ACVR1,ADAM9,ADAMTS1,ADAR,ADCY3,ADCY6,ADCYAP1,ADCYAP1R1,ADM,AGO2,AKAP6,AKAP7,AKR1C3,AKT2,ANXA7,AOC1,APEX1,AQP1,ARID1A,ARNT2,ASH2L,ASPH,ATF1,ATP2B1,ATP2B4,ATP7B,BAK1,BCL2,BCL2L1,BID,BUD31,BYSL,C3,CACNA1B,CALCR,CALM1,CASP8,CASP9,CASQ2,CAV1,CD4,CD83,CDKN2A,CHRNB3,CHRNB4,COL1A1,CPS1,CREM,CRHBP,CRYAB,CYP1B1,DAB2,DDX58,DGCR8,DGKQ,DNMT3A,DPYSL2,DROSHA,DUSP1,EDNRB,EFNA5,E…			GO: Biological Process	GO:0051960	regulation of nervous system development	5.78039	ADGRL3,ANKRD27,APBB1,APP,ARF6,ATP8A2,BCL11A,BCL6,BNIP2,BRINP3,CCDC88A,CCL5,CDON,CHODL,CNTN4,CX3CL1,DAB2IP,DLX1,DLX2,DPYSL3,DUSP10,ECT2,EPHA7,EPHB1,EPHB2,FLRT3,FOXA1,GATA3,GNRH1,GPRC5B,HDAC2,HES1,HEY1,HEY2,ID1,ID2,IFNG,IGF1,IL6,INPP5F,ITM2C,LIG4,LINGO1,LYN,LZTS1,MYCN,NCS1,NDNF,NFE2L2,NR2E1,NREP,NRXN1,NTM,OMG,PALM,PLK2,PLXND1,PTPRG,RAPGEF4,RET,RIMS1,RRN3,RTN4,SDK1,SEMA7A,SERPINE2,SHTN1,SIRT1,SLC45A…			GO: Biological Process	GO:0046903	secretion	5.983	A2M,ABCB4,ABCC3,ABL1,ACSL4,ACVR1C,ADAM8,ADAM9,ADCYAP1,ADM,AHI1,ALOX12B,ANXA5,APP,AQP5,ARHGAP17,ARHGAP44,ARNTL,ARRB1,ASIC1,ATP7A,BAD,BDNF,BLK,BLOC1S6,C1QTNF3,CA9,CACNA1B,CACNA1E,CACNA2D2,CACNB4,CAD,CALM2,CANX,CASR,CAV1,CBLN4,CCN2,CCR1,CD34,CD9,CDK16,CELSR2,CHI3L1,CHRM5,CPLANE2,CPLX1,CREB1,CREB3L1,CRY1,CSF1R,CX3CL1,CYP4A11,DOC2A,EIF2AK3,EXOC3L2,EXOC3L4,EZR,FGF23,FGFR1,FGFR4,FKBP1B,FOXF1,FURIN,GAD1,…			GO: Biological Process
GO: Biological Process	GO:0046903	secretion	10	ABCB11,ABCC3,ABCC4,ACSL4,ACTN2,ADAM8,ADAM9,ADCYAP1,ADORA1,ADORA3,AIM2,AKAP5,ANGPT1,ANPEP,ANXA1,AP1G1,APLP2,APP,APRT,ARFGEF1,ARFGEF2,ARL2BP,ARNTL,ARRB1,ASIC1,ATG7,ATP6AP1,ATP7B,AVPR2,B4GALT1,BANK1,BCR,BDNF,BLOC1S6,BTN3A1,BTN3A2,C1QTNF3,CA9,CACNA1E,CACNA1G,CACNA2D2,CAD,CADM1,CALM2,CAMP,CASK,CBLN1,CCK,CCKAR,CCKBR,CCL5,CCND1,CD2,CD34,CD9,CELSR2,CGA,CHRNA3,CHRNA4,CKLF,CLTRN,CNR1,COMT,CORO1A,CPLX1,CPT1…			GO: Biological Process	GO:0007167	enzyme linked receptor protein signaling pathway	10	ABI1,ACTR3,ADGRA2,AFP,AGTR2,AKT2,AMHR2,ANGPTL1,ANKS1A,AP2M1,APH1A,APH1B,AR,ARF4,ARPC1A,ATP6V0B,ATP6V1A,ATP6V1C2,ATP6V1G1,ATXN1,BAMBI,BCL9,BDNF,BMP10,BMP2,BMP3,BMP4,BMP5,BMP8B,BMPR1B,BMPR2,BRK1,BTK,CAV1,CCBE1,CD3E,CDC37,CDH5,CDKN1C,CHRDL2,CHST11,CISH,CITED2,CRK,DCP1A,DDIT4,DKK1,DOK2,EPHB3,ERRFI1,ESM1,ESRP1,ESRP2,F11R,FAM89B,FASLG,FBN2,FES,FGF1,FGF12,FGF17,FGF18,FGF19,FGF21,FGF3,FGF5,FGFR3,FGR,FKBP…			GO: Biological Process	GO:0034248	regulation of cellular amide metabolic process	10	AARS,ADAR,AGO1,ATF4,BCL3,BTG2,CCL5,CPEB2,CYP1B1,DAPK1,DDX25,DICER1,DNAJC3,EEF2,EIF2AK2,EIF3B,EIF3D,EIF3H,EIF3I,EIF4A1,EIF4E3,EIF4G1,EIF4G3,ELAVL1,EP300,FAM129A,FMR1,FXR1,GAPDH,HNRNPA2B1,IGF2BP3,IL6,IREB2,KRT17,LARS,LSM14A,MKNK2,NCBP2,NCOR1,NFKB1,NSMAF,PAIP2,PER2,PINK1,POLDIP3,PPP1CA,PTBP1,PYM1,RPS14,S100A9,SAMD4A,STAT3,TNRC6C,TPR,TUT4,UHMK1,YBX3,ZFP36			GO: Biological Process	GO:1903047	mitotic cell cycle process	5.85563	ABL1,ABRAXAS2,ADAM17,AKAP8,ALMS1,ANAPC10,ANAPC7,ANKLE2,ANKRD17,APEX1,ARL8B,ATF2,AURKA,AURKB,AURKC,BBS4,BCL2,BIN3,BIRC5,BRD4,BTC,BTG2,BUB1B,BUB3,CABLES1,CACUL1,CAMK2B,CASP2,CCNA2,CCNB1,CCNY,CDC20,CDC23,CDC25B,CDC26,CDC42,CDC45,CDC7,CDCA3,CDCA8,CDK10,CDK2,CDKN2A,CDT1,CENPJ,CENPN,CEP192,CEP57L1,CEP85,CETN2,CHEK2,CHMP1A,CHMP4B,CKS2,CLTCL1,CNEP1R1,CNOT6L,CNTRL,CUL3,CUL4A,CYP1A1,DLGAP5,DMRT1,DUSP1,DYNL…			GO: Biological Process	GO:0030334	regulation of cell migration	10	AAMP,ABHD6,ACVR1,ADAM9,ADARB1,ADORA3,AKT2,AOC3,APEX1,APOD,AQP1,ARHGAP5,ARPIN,BCL2,BMPR2,CAPN7,CBLL1,CCBE1,CCL25,CCL7,CCR7,CEACAM1,CGA,CLIC4,CNN2,COL1A1,COL3A1,CORO1B,CXCL1,CXCL16,CXCL3,CXCR2,CXCR4,CYP19A1,CYP1B1,DAB2,DDX58,DLL4,ELP1,ENPP2,F10,FADD,FBXW7,FGF1,FGF18,FLNA,FLT1,GAB2,GNA13,GPER1,GREM1,HBEGF,HDAC5,HMGB1,IGF1,IGFBP3,IL18,IL24,IL4,IL6,ITGA4,ITGAV,KIT,KITLG,KLF4,KLRK1,KRIT1,LAMA5,LAMB1,LG…			GO: Biological Process	GO:0048608	reproductive structure development	5.73055	AKR1C3,AMH,AMHR2,ARID4B,ARID5B,CCND1,CITED2,CSDE1,CSF2,DCN,DMRT1,DNMT3L,E2F8,EDN2,EREG,ERMP1,FGF9,FOXA1,GATA3,GNRH1,GRHL2,H3F3B,HES1,HEY1,HEY2,IGF1,INSL6,KITLG,LFNG,LHCGR,MAPK1,MMP13,MMP14,MSH2,PDGFRA,PRLR,PTGIS,PTGS2,RSPO3,SENP2,SERPINE2,SIRT1,SLIT3,SMAD4,SNAI1,SPP1,SRC,STK3,TAF4,TIPARP,TOX2,UMODL1,WNT2			GO: Biological Process	GO:0007264	small GTPase mediated signal transduction	5.94427	A2M,ABRA,AGAP2,ALS2,ARAP1,ARAP3,ARFIP2,ARHGAP15,ARHGAP17,ARHGAP18,ARHGAP26,ARHGAP36,ARHGAP4,ARHGAP44,ARHGAP9,ARHGDIB,ARHGEF1,ARHGEF12,ARHGEF17,ARHGEF19,ARHGEF39,ARL13B,ARL15,ARL5B,ARRB1,BNIP2,CDC42EP2,CDH2,CPLANE2,CRK,CUL3,CYTH4,DBNL,DGKZ,DHCR24,DIRAS1,DNM2,DOCK11,DOCK4,DOK2,ERBB2,FBP1,FGD1,FGD5,GARNL3,GBF1,GDI1,GNB1,GRAP,HACD3,HRAS,IQSEC3,ITGB1,ITPKB,KIF14,KITLG,MAPKAPK2,MAPKAPK3,MCF2L,MFHAS1,MR…			GO: Biological Process
GO: Biological Process	GO:0046854	phosphatidylinositol phosphorylation	10	BPNT1,CD28,CD86,EFR3A,EGF,ERBB2,ERBB3,ERBB4,FGF1,FGF19,FGF23,FGF3,FGFR4,FYN,GAB1,IMPAD1,INPP1,IRS1,KL,LCK,NRG1,NRG2,PDGFA,PDGFRA,PI4K2B,PIK3C2A,PIK3C2B,PIK3R1,PIP4K2A,PIP4K2B,PIP5K1B,PTPN11,TTC7B,VAV1			GO: Biological Process	GO:0019080	viral gene expression	10	EIF3B,EIF3D,FURIN,GTF2F1,HDAC1,HPN,IFITM3,LEF1,NUP50,NUPL2,POLR2F,POLR2K,PTBP1,RPL10,RPL15,RPL17,RPL19,RPL22,RPL23,RPL27,RPL27A,RPL28,RPL3,RPL31,RPL32,RPL34,RPL35A,RPL36,RPL37,RPL5,RPL9,RPS12,RPS13,RPS14,RPS16,RPS19,RPS2,RPS21,RPS24,RPS26,RPS3,RPS5,RPS6,RPS7,RPS8,SMARCA4,SP1,SP100,SSB,SUPT4H1,TFAP4,TRIM21,TRIM62,UBA52			GO: Biological Process	GO:0023057	negative regulation of signaling	10	ACVR1C,ADAM17,ADAR,ADGRA2,AP2M1,ATF3,BMF,CALM2,CARD19,CAV1,CAV2,CAVIN3,CCL5,CHD8,CHRDL1,CHRDL2,CLOCK,CREB3,CREBRF,CRY1,CRYBA1,CSK,CTNNA1,CXXC4,CYLD,DAB1,DAB2,DAG1,DAPK1,DCN,DDIT3,DUSP10,DUSP8,DVL2,DYRK1A,ENPP1,ERBB3,ERBIN,EZR,FBN1,FBN2,FGF23,FMR1,FOXP1,FSTL3,FZD6,G2E3,GBP1,GCLM,GDPD5,GLG1,GRB10,HERPUD1,HIPK2,HMGB2,HTR2B,HTRA1,HYOU1,IGFBP1,IL1A,IL6,INHBA,ITPR1,KANK2,KCNQ1,KDM1A,KLF4,LATS2,LEF1,LGA…			GO: Biological Process	GO:0048732	gland development	5.83059	ABL1,ADCYAP1,AK4,AKT2,ALDOB,ALOX15B,ATP2B2,BCL2,BCL2L11,BMPR1A,CAD,CCDC40,CCKBR,CDC42,CDH1,CDKN2A,CEACAM1,CGA,COBL,CPS1,CRKL,CTNNB1,CUL3,CYP17A1,CYP19A1,CYP1A1,DAG1,E2F8,EDAR,EIF2AK3,ELF3,ELF5,EPHA2,ESR1,ETS1,ETV4,ETV5,EZH2,EZR,FGF10,FGFR1,FOXF1,FPGS,FRS2,GATA6,GLI1,GLI3,GNPNAT1,HMGCL,HMGCS1,HMOX1,HP,ICMT,ID2,IL6,IQGAP3,IRS1,JARID2,KLF1,KLKB1,LAMA1,LAMA5,LIMS1,LRP6,MAP2K1,MAPK1,MDK,MED1,MRTFB,MSX…			GO: Biological Process	GO:0001944	vasculature development	10	AAMP,ACKR3,ACVR1,ADAMTS1,ADGRB1,ADIPOR2,ADM,ADORA2B,ANKRD17,ANPEP,AP2B1,APOB,APOD,AQP1,ARID1A,ATP7A,BAK1,BMPR2,C3,CAMP,CASP8,CAV1,CCBE1,CCR3,CEACAM1,CHM,CLIC4,COL15A1,COL1A1,COL3A1,CPLANE1,CTH,CXCR2,CXCR4,CYP1B1,DCTN5,DLL4,DYNC2H1,EGF,ENPP2,EPC1,EPHB2,ESM1,FBXW7,FGF1,FGF18,FGF8,FLNA,FLT1,GATA2,GNA13,GPER1,GREM1,HBEGF,HDAC5,HECTD1,HIF1AN,HIPK2,HMGB1,HOXA1,HOXB13,HPSE,HSPG2,HTATIP2,IGF1,IL18,IL6,IS…			GO: Biological Process	GO:0016049	cell growth	5.68341	ACSL4,ADNP2,ALOX12,APBB1,APP,BCL11A,BCL6,BDKRB1,CCN2,CCN3,CDKN1A,CRIM1,DAB2IP,DCUN1D3,DDX5,EDN1,EMP1,EPHA7,FHL1,FLRT3,H2AFY,H3F3B,HBEGF,HTRA3,IGF1,IL6,LEFTY1,LGI1,MMP14,NDNF,NET1,NOL8,OMG,PLXND1,RAPH1,RASGRP2,RB1,RERG,RIMS1,ROS1,RRAD,RTN4,SDCBP,SEC61A1,SEMA7A,SERPINE2,SH3BP4,SHTN1,SIRT1,SLC3A2,SLC9A6,SLIT3,SMAD4,SMURF1,SOCS2,SPP1,SYT4,WFDC1,WNT3			GO: Biological Process	GO:0007167	enzyme linked receptor protein signaling pathway	5.86167	ABL1,ACTG1,ACTR3,ACVR1C,ADAM9,ADGRA2,AHI1,AKT1,ANKS1A,AP2A2,AP2B1,APP,APPL1,ARAP1,ARPC1B,ARPC2,ARRB2,ATP6V0D2,ATP6V1A,ATP6V1B1,ATP6V1E2,BAIAP2L2,BCL9,BDNF,BLK,BMP10,BMP15,BMP3,BMPR2,CAV1,CCN1,CCN2,CDH3,CDKN1C,CILP,CLTA,COL1A1,CPNE3,CREB1,CRK,CSF1R,CTNNB1,CYFIP2,DAND5,DDIT4,DKK1,DMRT1,DNM2,DOK2,DOK4,DSG4,DSTYK,ECSIT,EFNA4,EIF2AK3,EPHA7,EPHB2,ERBB2,ERBIN,ESRP2,F3,FAM89B,FBN2,FGF18,FGF19,FGF23,FGFR1…			GO: Biological Process
GO: Biological Process	GO:0032101	regulation of response to external stimulus	10	ACTL6A,ADAM10,ADAM8,ADCYAP1,ADORA1,ADORA3,AIM2,ANKRD17,ANXA1,AP1G1,AP1S1,APOD,ASIC2,ATG7,ATP6V0A1,ATP6V0A2,ATP6V1B2,BCR,BNIP3L,C1QTNF3,C3,C4BPA,C5orf30,C8A,CALM2,CASK,CASP3,CCK,CCL18,CCL2,CCL23,CCL5,CD180,CD247,CD28,CD34,CD44,CD47,CD93,CDH13,CFP,CLN3,CNGA1,CNGB1,CNR1,CNR2,CORO1B,CPA3,CTSS,CUEDC2,CX3CL1,CXCL10,CXCL11,CXCL13,CXCL8,CXCL9,CXCR2,CYBA,CYP27B1,DBN1,DDX58,DHX58,DNM1L,DOCK2,DSCAM,EDN2,EDN…			GO: Biological Process	GO:0019083	viral transcription	10	GTF2F1,HDAC1,HPN,IFITM3,LEF1,NUP50,NUPL2,POLR2F,POLR2K,RPL10,RPL15,RPL17,RPL19,RPL22,RPL23,RPL27,RPL27A,RPL28,RPL3,RPL31,RPL32,RPL34,RPL35A,RPL36,RPL37,RPL5,RPL9,RPS12,RPS13,RPS14,RPS16,RPS19,RPS2,RPS21,RPS24,RPS26,RPS3,RPS5,RPS6,RPS7,RPS8,SMARCA4,SP1,SP100,SUPT4H1,TFAP4,TRIM21,TRIM62,UBA52			GO: Biological Process	GO:0009725	response to hormone	10	ABCA3,ABCG1,ACSL1,ACTA1,ACVR1C,ADCYAP1,AKAP13,ALAD,ALDH3A1,ANGPTL3,AP3S1,ARID1A,ASNS,ATP6V0A2,ATP6V1B1,ATP6V1C2,BRCA2,BTG2,CAD,CALM2,CARM1,CATSPERB,CAV1,CAV2,CCL5,CLOCK,CPEB2,CPS1,CREBRF,CRY1,CSK,CTNNA1,DAB2,DAG1,DNMT3B,DSG2,EEF2,ENDOG,ENPP1,EP300,ESRRG,FBN1,FGF23,FOS,FOXP1,GABRB1,GAL,GATA4,GRB10,HADHA,HMGB2,HNRNPU,IGFBP1,IL6,INHBA,KANK2,KHK,KLF9,KRT19,LATS2,LEF1,LOX,MARCKS,MB,MDK,MECP2,MED12,MED…			GO: Biological Process	GO:0030334	regulation of cell migration	5.73228	ACTN4,ACVRL1,ADAM10,ADAM17,ADARB1,ADGRA2,ADORA3,AKT2,ALOX15B,AMOTL1,ANGPT1,ANO6,APEX1,APOE,APOH,ARHGAP4,ARHGEF39,ATOH8,BCAS3,BCL2,BMP10,C16orf45,C5,C5AR2,CBLL1,CCAR1,CCBE1,CCL7,CCN1,CCR6,CDH1,CEACAM1,CEMIP,CGA,CIB1,CMKLR1,CREB3,CX3CR1,CXCL12,CXCL2,CXCL3,CXCL8,CYP19A1,DAB2,DACH1,DAG1,DIAPH1,DOCK10,DPEP1,DPYSL3,ELP5,EMP2,ENG,EPB41L5,EPHA2,EPHA3,ETS1,F7,FBXO31,FGF10,FGF18,FGFR1,FGFR1OP,FOXF1,FURIN,G…			GO: Biological Process	GO:0048870	cell motility	10	AAMP,ABHD6,ACVR1,ADAM9,ADARB1,ADCY3,ADORA3,AKT2,AOC3,APBB1,APBB2,APEX1,APOB,APOD,AQP1,ARHGAP5,ARHGEF5,ARID5B,ARL13B,ARPIN,ATP2B4,AXL,AZU1,BBS1,BBS4,BCL2,BMPR2,BVES,CAPN7,CAV1,CBLL1,CCBE1,CCDC141,CCK,CCL17,CCL25,CCL27,CCL7,CCR3,CCR4,CCR7,CCSAP,CD58,CD84,CDC42BPA,CEACAM1,CELSR2,CGA,CHGA,CLIC4,CNN2,COL1A1,COL3A1,CORO1B,CTHRC1,CXCL1,CXCL16,CXCL3,CXCR2,CXCR4,CYP19A1,CYP1B1,DAB2,DCLK1,DDX58,DEPDC1B,DLL…			GO: Biological Process	GO:0045664	regulation of neuron differentiation	5.66626	ANKRD27,APBB1,APP,ARF6,ATP8A2,BCL11A,BCL6,BNIP2,BRINP3,CCDC88A,CCL5,CDON,CHODL,CNTN4,DAB2IP,DPYSL3,ECT2,EPHA7,EPHB2,FOXA1,GATA3,GPRC5B,HDAC2,HES1,HEY1,HEY2,ID1,ID2,IFNG,IL6,INPP5F,ITM2C,LINGO1,LYN,LZTS1,MYCN,NCS1,NDNF,NFE2L2,NR2E1,NREP,NTM,OMG,PALM,PLK2,PLXND1,PTPRG,RAPGEF4,RET,RIMS1,RRN3,RTN4,SDK1,SEMA7A,SERPINE2,SHTN1,SIRT1,SLIT3,SMURF1,SOCS2,SPP1,SSH2,SYT4,WNT3,YWHAG,ZEB1			GO: Biological Process	GO:0043066	negative regulation of apoptotic process	5.79683	AARS,ABL1,ACKR3,ACTC1,ADAM8,ADCYAP1,AGAP2,AHI1,AKT1,ALMS1,AMBRA1,ANXA5,ARRB1,ARRB2,ASNS,ATAD3A,ATP7A,BAD,BAG5,BAX,BCL2A1,BDNF,BEX3,BIRC3,BIRC7,BLK,BMF,BNIP2,BNIP3L,BTG2,CAV1,CCN1,CD44,CIAPIN1,CLN3,CREB3L1,CRLF1,CSF1R,CTNNB1,CTTN,CX3CL1,DAD1,DAPK1,DHCR24,DHRS2,DLX1,DUSP1,EEF2K,EIF2AK3,EN2,EPOR,ERBB2,FAIM,FHL2,FLT4,G2E3,GAS6,GCLC,GCLM,GLI3,GOLPH3,GREM1,GRIK2,HDAC1,HDAC2,HELLS,HIF1A,HK1,HRAS,HSP90AB…			GO: Biological Process
GO: Biological Process	GO:0019752	carboxylic acid metabolic process	10	AARS,AASS,ABCB11,ABHD12,ACADVL,ACLY,ACO1,ACOT2,ACOT7,ACSL4,ADI1,AGMAT,AHCY,AKR1C1,AKR1C2,ALDH18A1,ALDH3A2,ALDH4A1,ALDH6A1,ALDH8A1,ALDOC,ALKBH7,ALOX15,AMACR,ANXA1,AS3MT,ASNS,ASRGL1,ATF4,ATG7,ATP2B4,AUH,BBOX1,BCKDHB,BDH2,BPGM,BPHL,BTD,C3,CAD,CARNS1,CARS,CBFA2T3,CBS,CLN3,CNDP2,CNR1,COMT,CPT1A,CPT1B,CPT1C,CREM,CRTAP,CRYL1,CSPG4,CTPS2,CYB5A,CYP27A1,CYP2A13,CYP2E1,CYP2F1,CYP2J2,CYP2U1,CYP46A1,CYP7A1,CY…			GO: Biological Process	GO:0044033	multi-organism metabolic process	10	APOBEC3D,ATG16L1,ATG7,CXCL8,EIF3B,EIF3D,FURIN,GTF2F1,HDAC1,HPN,IFITM3,LEF1,NUP50,NUPL2,POLR2F,POLR2K,PTBP1,RPL10,RPL15,RPL17,RPL19,RPL22,RPL23,RPL27,RPL27A,RPL28,RPL3,RPL31,RPL32,RPL34,RPL35A,RPL36,RPL37,RPL5,RPL9,RPS12,RPS13,RPS14,RPS16,RPS19,RPS2,RPS21,RPS24,RPS26,RPS3,RPS5,RPS6,RPS7,RPS8,SMARCA4,SP1,SP100,SSB,SUPT4H1,TFAP4,TRIM21,TRIM62,UBA52			GO: Biological Process	GO:0019058	viral life cycle	10	ADAR,APOBEC3F,APOBEC3G,CAV1,CAV2,CCL5,CCNT1,CXCR4,DAG1,DICER1,EFNB2,EIF2AK2,EIF3B,EIF3D,EP300,FMR1,HMGA2,HSP90AB1,IFIT1,IFITM1,IFITM2,IFITM3,ISG15,ITGB6,KPNB1,LEF1,MX1,NOTCH1,NUP205,NUP210,NUP214,NUP54,NUP58,PDCD6IP,PKN2,PLSCR1,POLR2A,PTBP1,RPL13,RPL19,RPL23,RPL27,RPL27A,RPL3,RPL30,RPL31,RPL32,RPL37,RPL9,RPLP1,RPS12,RPS14,RPS19,RPS26,RPS6,RPS7,RSAD2,SLC10A1,SMARCA4,SRPK1,TARDBP,TFRC,TPR,USP6NL,VA…			GO: Biological Process	GO:2000145	regulation of cell motility	5.66893	ABL1,ACTN4,ACVRL1,ADAM10,ADAM17,ADARB1,ADGRA2,ADORA3,AKT2,ALOX15B,AMOTL1,ANGPT1,ANO6,APEX1,APOE,APOH,ARHGAP4,ARHGEF39,ATOH8,BBS1,BBS4,BCAS3,BCL2,BMP10,BTC,C16orf45,C5,C5AR2,CBLL1,CCAR1,CCBE1,CCL7,CCN1,CCR6,CDH1,CEACAM1,CEMIP,CGA,CIB1,CMKLR1,CREB3,CX3CR1,CXCL12,CXCL2,CXCL3,CXCL8,CYP19A1,DAB2,DACH1,DAG1,DIAPH1,DOCK10,DPEP1,DPYSL3,ELP5,EMP2,ENG,EPB41L5,EPHA2,EPHA3,ERBB3,EREG,ETS1,F7,FBXO31,FGF10,FGF…			GO: Biological Process	GO:0001568	blood vessel development	10	AAMP,ACKR3,ACVR1,ADAMTS1,ADGRB1,ADIPOR2,ADM,ADORA2B,ANKRD17,ANPEP,AP2B1,APOB,APOD,AQP1,ARID1A,ATP7A,BAK1,BMPR2,C3,CAMP,CASP8,CAV1,CCBE1,CCR3,CEACAM1,CHM,CLIC4,COL15A1,COL1A1,COL3A1,CPLANE1,CXCR2,CXCR4,CYP1B1,DCTN5,DLL4,DYNC2H1,EGF,ENPP2,EPHB2,ESM1,FBXW7,FGF1,FGF18,FGF8,FLNA,FLT1,GATA2,GNA13,GPER1,GREM1,HBEGF,HDAC5,HECTD1,HIF1AN,HIPK2,HMGB1,HOXA1,HOXB13,HPSE,HSPG2,HTATIP2,IL18,IL6,ISL1,ITGAV,ITGB2…			GO: Biological Process	GO:0061458	reproductive system development	5.62333	AKR1C3,AMH,AMHR2,ARID4B,ARID5B,CCND1,CITED2,CSDE1,CSF2,DCN,DMRT1,DNMT3L,E2F8,EDN2,EREG,ERMP1,FGF9,FOXA1,GATA3,GNRH1,GRHL2,H3F3B,HES1,HEY1,HEY2,IGF1,INSL6,KITLG,LFNG,LHCGR,MAPK1,MMP13,MMP14,MSH2,PDGFRA,PRLR,PTGIS,PTGS2,RSPO3,SENP2,SERPINE2,SIRT1,SLIT3,SMAD4,SNAI1,SPP1,SRC,STK3,TAF4,TIPARP,TOX2,UMODL1,WNT2			GO: Biological Process	GO:0070848	response to growth factor	5.77418	ABL1,ACVR1C,ADAM9,ADGRA2,AKT1,APP,ARRB2,BCL9,BMP10,BMP15,BMP3,BMPR2,BPTF,CAD,CAV1,CCN1,CCN2,CD44,CDC34,CDKN1C,COL1A1,CPNE3,CREB1,CTNNB1,CXCL13,DAND5,DDC,DDIT4,DKK1,DLL4,DNM2,DSG4,DSTYK,ECSIT,EEF2,EEF2K,EHD1,EMD,ERBB2,ESRP2,FAM89B,FBN2,FGF18,FGF19,FGF23,FGFR1,FGFR4,FLT4,FMOD,FOS,FSHB,FURIN,GAREM1,GAS6,GATA5,GCNT2,GDF3,GPC1,GRB10,GREM1,HAS1,HAS2,HDAC2,HHEX,HIF1A,HNRNPF,HNRNPM,HOXA13,HSPA5,HSPB1,HYA…			GO: Biological Process
GO: Biological Process	GO:0007596	blood coagulation	10	ACTB,AKAP10,AP3B1,ARRB1,ASIC2,BLOC1S6,C3,CAPZB,CBX5,CD34,CD9,COL3A1,CX3CL1,DGKB,DGKE,DGKG,DOCK6,ENTPD2,EVL,F10,F13B,F2RL2,F7,F8,F9,FAP,FBLN1,FCER1G,FIBP,FLNA,FYN,GNA12,GNB1,GP1BA,GP6,HBB,HNF4A,HPS1,HPSE,IL6,JAK2,LAT,LCK,LMAN1,LNPK,MFN2,MYH9,MYL9,P2RX2,P2RX3,P2RX6,PDGFA,PDGFRA,PDPN,PF4,PF4V1,PIK3R1,PLAT,PRCP,PRDX2,PRKACB,PRKCA,PRKCE,PRKCH,PROCR,PTPN11,PTPRJ,RAB5A,SERPINA10,SERPINB2,SERPINC1,SERPIN…			GO: Biological Process	GO:0019058	viral life cycle	10	APOBEC3B,APOBEC3D,ATG16L1,ATG7,CAV1,CD55,CD86,CHMP4A,CHMP5,CLEC4G,CR2,CXCL8,CXCR4,CXCR6,DEK,DPP4,EIF3B,EIF3D,F11R,FCN1,FCN3,FURIN,GTF2F1,GYPA,HDAC1,HPN,HYAL2,IFITM2,IFITM3,ILF3,KPNA1,KPNB1,LAMP3,LEF1,LTF,MITD1,NECTIN4,NUP50,NUPL2,OAS1,POLR2F,POLR2K,PPIH,PTBP1,RAB1A,RPL10,RPL15,RPL17,RPL19,RPL22,RPL23,RPL27,RPL27A,RPL28,RPL3,RPL31,RPL32,RPL34,RPL35A,RPL36,RPL37,RPL5,RPL9,RPS12,RPS13,RPS14,RPS16,RP…			GO: Biological Process	GO:0016477	cell migration	10	ABCC1,ACVR1C,ADAM17,ADGRA2,ANGPTL3,APBB2,ARL13B,ARPC5,BTG1,C5orf30,CAV1,CCL24,CCL5,CD2AP,CD34,CD47,CD48,CELSR1,CERS2,CNN2,COL5A1,CREB3,CSK,CSPG4,CTNNA2,CXCL11,CXCL2,CXCL5,CXCR4,CYP1B1,DAB1,DAB2,DAG1,DCN,DDX58,DOCK8,EFNA1,EFNB2,EMP2,EPHB4,F2,FAP,FAT1,FERMT1,FGF18,FLNA,FNDC3B,FOXP1,FSCN1,GBF1,GLG1,GPR18,HAS2,HES1,HMGB2,HTR2B,IFITM1,IL1A,IL6,JAK1,KDR,KLF4,KLRK1,LAMA5,LAMB1,LAMC1,LCP1,LEF1,LGALS3,LHX…			GO: Biological Process	GO:0048608	reproductive structure development	5.5946	ADCYAP1,AKR1C3,ALKBH1,ALOX15B,AMH,AMHR2,ANG,ANGPT1,BCL2,BCL2L11,BCL2L2,BIK,BMP15,CASP2,CCN1,CDH1,CGA,CSF2,CTNNB1,CYP17A1,CYP19A1,CYP27B1,DMC1,DMRT1,E2F8,EIF2B4,EIF2S2,EPAS1,EREG,ESR1,FGF10,FOSL1,FOXF2,FRS2,FST,FZD5,GAB1,GATA6,GDF9,HECTD1,HEY2,HMGCS1,HSD17B3,HSF1,HTRA1,ICAM1,IL1A,ING2,INSL6,KIT,LIF,LRP6,MAMLD1,MAP2K1,MAP3K4,MAPK1,MDFI,MED1,MGST1,NCOA4,NDP,NEFH,NOS3,NTRK1,OSR1,OVOL2,PCDH12,PGR,PITX…			GO: Biological Process	GO:0040012	regulation of locomotion	10	AAMP,ABHD6,ACVR1,ADAM9,ADARB1,ADORA3,AKT2,AOC3,APEX1,APOD,AQP1,ARHGAP5,ARPIN,AZU1,BBS1,BBS4,BCL2,BMPR2,BVES,CAPN7,CAV1,CBLL1,CCBE1,CCL25,CCL7,CCR4,CCR7,CCSAP,CEACAM1,CGA,CLIC4,CNN2,COL1A1,COL3A1,CORO1B,CXCL1,CXCL16,CXCL3,CXCR2,CXCR4,CYP19A1,CYP1B1,DAB2,DDX58,DLL4,EGF,ELP1,ENPP2,EXOC2,F10,FADD,FBXW7,FCN1,FEZF2,FGF1,FGF18,FLNA,FLT1,GAB2,GNA13,GPER1,GREM1,GRM5,HBEGF,HDAC5,HMGB1,HTR2C,IGF1,IGFBP3,IL1…			GO: Biological Process	GO:0071495	cellular response to endogenous stimulus	5.5707	ABCG2,ACVR1,ACVR2B,ADAMTS7,ADCY2,ADCY3,AKAP7,AKR1C1,AKR1C2,AKR1C3,AMHR2,ANOS1,APP,ATP2B1,ATP6V0D2,ATP6V1E2,BAG4,CCL5,CCN2,CITED2,CRHBP,CTDSPL2,DAB2IP,DDX5,EDN1,ERRFI1,ESRRG,FERMT2,FGB,FGF19,FGF4,FGF6,FGF9,FLRT3,FOXA1,GABRB1,GATA3,GLRA3,GLRX,GPLD1,GRB10,H2AFZ,HAS1,HDAC2,HES1,HEY1,HNF4G,HNRNPM,HRH1,HTR2B,HTRA3,ID1,IGF1,IL6,JAK2,KLF6,LEFTY1,LEMD3,LHCGR,LMO3,LTBP1,LYN,MAPK1,MED14,MED30,MICALL1,MSTN,N…			GO: Biological Process	GO:0030182	neuron differentiation	5.75951	ABL1,ABT1,ACSL4,ACTR3,ADCY6,ADCYAP1,ADGRV1,ADM,ADNP2,AHI1,AKT1,ALMS1,ALS2,ANKS1A,APOA5,APP,ARHGAP4,ARHGEF1,ATP7A,ATP8B1,ATXN10,B3GNT2,BAG5,BDNF,BLOC1S6,BMPR2,BNIP2,BRINP1,BTBD3,BTG2,CALU,CAMSAP2,CARM1,CAV1,CCDC88A,CD44,CDC20,CDH2,CDK16,CDKN1C,CELSR2,CHODL,CIT,CLN5,CNTN6,CNTNAP1,COL25A1,CREB1,CSF1R,CSNK1E,CTDSP1,CTNNB1,CTTN,CXCR4,DBN1,DBNL,DDIT4,DIAPH1,DKK1,DLL4,DLX1,DNM2,DNMT3A,DNMT3B,EEF2K,EFNA4…			GO: Biological Process
GO: Biological Process	GO:0071495	cellular response to endogenous stimulus	10	ABCG2,ABHD2,ACTN2,ADAM9,ADAMTS7,ADCY7,ADCYAP1,AKAP5,AKAP7,AKR1C1,AKR1C2,ALPP,ANXA1,AOC1,APOB,APP,APRT,ARID1A,ARNTL,ASNS,ATP1A1,ATP2B4,ATP6AP1,ATP6V0A1,ATP6V0A2,ATP6V1B2,AVPR2,BAG4,BAIAP2,BAIAP2L2,BCL9L,BDNF,BLM,BMP2,BMP3,BMP5,BMP8B,C2CD5,CAD,CALCA,CASP9,CASQ2,CASTOR1,CAV2,CBL,CCKAR,CCL2,CCL5,CD44,CD9,CDC5L,CDH13,CDH5,CDK2,CGA,CIB2,CITED1,CITED2,CNOT1,COL16A1,COL2A1,COL3A1,COL4A1,COL4A2,COL5A2,COR…			GO: Biological Process	GO:0016477	cell migration	10	ACTN4,ADGRA2,ADGRL3,ADORA3,AGTR2,AIMP1,AKT2,ALX1,ANKS1A,ANXA3,ARF4,ARSB,ATP8A1,AVL9,B4GALT1,BAMBI,BAX,BDKRB1,BMP10,BMP2,BMP4,BMP5,BMPR2,BTG1,C1QBP,C3AR1,C5AR2,CALCA,CALR,CAMK2D,CARMIL1,CAV1,CCAR1,CCBE1,CCDC88A,CCL20,CCL21,CCL25,CCL26,CCR1,CCR4,CCR7,CD244,CD47,CEMIP,CFL1,CGA,CHL1,CITED2,CLN3,CNTN2,CORO1A,CREB3,CTNNA2,CX3CR1,CXCL1,CXCL11,CXCL13,CXCL8,CXCR2,CXCR4,CXCR5,DAPK2,DAPK3,DDIT4,DOCK8,DOK2,D…			GO: Biological Process	GO:0006605	protein targeting	10	ADAR,AP3B1,ARL6IP1,ATP5IF1,BCL3,CREB3,CYLD,DAB2,DAG1,DDX58,EDAR,EP300,ERBIN,FLNA,HES1,HSP90AB1,HSPA8,HUWE1,IL6,IPO4,IPO5,IPO7,IPO8,KPNB1,LMNA,MFN2,MTX2,MYADM,NAGPA,NEDD4,NUP205,NUP214,NUP54,NUP58,NUTF2,OPTN,PARL,PDE2A,PDZK1,PEX6,PHIP,PINK1,PPP1R3C,PRDX1,PTCH1,RAB27A,RPL13,RPL19,RPL23,RPL27,RPL27A,RPL3,RPL30,RPL31,RPL32,RPL37,RPL9,RPLP1,RPS12,RPS14,RPS19,RPS26,RPS6,RPS7,RUVBL1,SAMM50,SIRT1,SLC9A1,…			GO: Biological Process	GO:0043069	negative regulation of programmed cell death	5.52391	AATF,ABL1,ABRAXAS2,ADAM17,ADCYAP1,AHI1,AKT2,ALB,ALKBH1,ALMS1,ANGPT1,APOE,APOH,ARF4,ARNT2,ASIC2,ATAD3A,ATF5,AURKA,AURKB,AVEN,BAG5,BARD1,BCL2,BCL2L2,BCL6,BFAR,BIRC5,BNIP3,BTC,BTG2,CARD14,CASP2,CBL,CCN1,CD59,CHL1,CIB1,CNTFR,COMP,CREB3,CRLF1,CSF2,CTH,CTNNB1,CX3CR1,CXCL12,DAB2,DAPK1,DCPS,DNAJA3,DPEP1,DUSP1,EDNRB,EIF2AK2,EIF2AK3,EN1,EN2,ERBB3,ERCC5,FAIM,FAIM2,FCGR2B,FGF10,FIGNL1,FOXO1,FXN,FYN,GABRB2,GA…			GO: Biological Process	GO:0071495	cellular response to endogenous stimulus	10	AACS,ABCG2,ACVR1,ADAM9,ADAMTS1,ADCY3,ADCY4,ADCY6,ADCY7,ADCYAP1,ADIPOR2,AKAP6,AKAP7,AKR1C1,AKR1C2,AKR1C3,AKT2,ALPP,ANOS1,AOC1,APEX1,APOB,APOBEC1,AQP1,ARID1A,ATP2B1,ATP2B4,ATP6V0A1,ATP6V1B1,ATP6V1H,AVPR1B,AVPR2,BAIAP2L1,BBS4,BCL2L1,BMPR2,BPTF,BUD31,CASP9,CASQ2,CAV1,CD9,CEACAM1,CGA,CHRDL2,COL1A1,COL3A1,CORO1B,CPEB2,CPS1,CRHBP,CSNK1D,CTSL,CYP11B1,DAB2,DCP1A,DLL4,DNMT3A,DSTYK,DUSP1,E2F1,EFNA5,EHD1,ENP…			GO: Biological Process	GO:0040007	growth	5.55218	ACACB,ACSL4,ACVR2B,ADNP2,AGR2,ALOX12,AMH,APBB1,APP,ARID5B,ATP8A2,BCL11A,BCL6,BDKRB1,CACNA1C,CAMP,CCN2,CCN3,CDKN1A,CRIM1,DAB2IP,DCUN1D3,DDX5,EDN1,EMP1,EPC1,EPHA7,EREG,EVC,FGF9,FHL1,FLRT3,GATA3,GPD2,GRHL2,H2AFY,H3F3B,HBEGF,HDAC2,HEY2,HLX,HTRA3,IFNG,IGF1,IL6,LEFTY1,LGI1,MMP13,MMP14,MST1,MSTN,NDNF,NET1,NOL8,OMG,PLAC8,PLXND1,PRAME,PRLR,RAPH1,RASGRP2,RB1,RERG,RIMS1,RMI1,ROS1,RRAD,RTF1,RTN4,S1PR1,SAFB,S…			GO: Biological Process	GO:0043524	negative regulation of neuron apoptotic process	5.7233	AARS,ADAM8,AGAP2,AMBRA1,ATP7A,BAX,BDNF,BTG2,CLN3,CRLF1,DLX1,EN2,EPOR,GCLC,GCLM,GRIK2,HDAC1,HIF1A,HRAS,HSP90AB1,HSPD1,HSPH1,HYOU1,KIF14,LIG4,NONO,NRBP2,NTF4,OPTN,PARK7,PCP4,PDPK1,PINK1,POU4F1,RETREG1,RHOA,SOD1,STAMBP,STXBP1,TOX3,TP73,UNC5B,VEGFB,ZPR1			GO: Biological Process
GO: Biological Process	GO:0022604	regulation of cell morphogenesis	10	ACTR3,AKAP5,ANKRD27,ANXA1,ARAP3,ARHGAP15,ARHGAP4,ARHGEF1,ARPC2,AXIN2,BAIAP2,BCL9L,BDNF,BMP2,BMP5,CAPZB,CCL2,CDC42EP1,CDC42EP4,CDC42SE2,CDH2,CHN1,CHRNA3,CIT,CITED1,CNTN2,CORO1A,CORO1B,CUL7,CUX1,CYFIP1,DBN1,DCC,DCDC2,DISC1,DPYSL2,DSCAM,EIF2B2,ENAM,ENPP2,EPB42,FBLIM1,FBLN1,FGD3,FGF13,FLNA,FMNL1,FMOD,FYN,GAS2,GDI1,GNA12,GREM1,GRIN1,GSK3B,HNRNPK,IFT140,IFT46,IFT88,IL1RAPL1,IL6,ITGB1BP1,KANK1,KIF3A,L1C…			GO: Biological Process	GO:0010648	negative regulation of cell communication	10	ABCC8,ACKR3,ADGRA2,ADH7,AGAP2,AGTR2,AMER2,AMHR2,AP2M1,AR,ARF1,ARHGAP35,ARRB1,ATXN1,AVPR1A,BAMBI,BAX,BCL2L10,BDNF,BMP2,BMP4,BMP5,BTRC,C1QBP,C1QTNF3,CALCA,CALR,CAMK2B,CAV1,CD3E,CHMP4A,CHRDL2,CHST11,CISH,CLN3,CNIH2,CNKSR3,CREB3,CRHR2,CRTC3,CRY2,CRYBA1,CSF2,CSNK1E,CX3CR1,CXCL8,DDIT4,DDIT4L,DHRS3,DHX58,DKK1,DKK2,DNAJA1,DRD3,DUSP18,DUSP4,DUSP5,DYRK1A,EGFL7,ENY2,ERRFI1,EYA1,EZH2,FAM89B,FASLG,FBN2,FGA,FG…			GO: Biological Process	GO:0060548	negative regulation of cell death	10	AARS,ABCC1,ADAM17,ADAR,ADCYAP1,APBB2,ARL6IP1,ASNS,ATF4,ATP7A,BCL10,BCL3,BEX3,BIRC5,BMF,BTG2,CAV1,CCL5,CCNG1,CD34,CD59,CHD8,CREB3,CTNNA1,DAB2,DAPK1,DNAJC3,DOCK8,EFNA1,EIF2AK2,EP300,ERBB3,FLNA,FMN2,FOXP1,G2E3,GCLM,HERPUD1,HIPK2,HMGA2,HMGB2,HSP90AB1,HSP90B1,HSPA8,HTR2B,HYOU1,IL1A,IL6,IRAK1,ITPR1,KANK2,KDM1A,KDR,KLF4,LEF1,LGALS3,LIMS1,LMNA,LRP1,MDK,MDM4,MECP2,MSH2,MYOCD,NAA38,NCL,NCOA3,NDNF,NEO1,NFKB…			GO: Biological Process	GO:0001701	in utero embryonic development	5.5153	ACVRL1,ADAM10,ALKBH1,ANGPT1,APBA3,ARNT2,AXIN1,BCL2L11,BMPR1A,C5,CCN1,CCNB1,CCNB1IP1,CDH1,COL4A3BP,CSF2,CTNNB1,CUL3,CUL4A,DAB2,DUSP3,E2F8,EIF2S2,ELF3,EPAS1,EPB41L5,FGFR1,FOSL1,FOXF1,FZD5,GAB1,GATA6,GLI3,GNA12,GNA13,GRN,HBA2,HECTD1,HEY2,HSF1,ICMT,IHH,INPP5K,JAG2,KLF1,KLF2,LATS2,LIF,MAP2K1,MAPK1,MDFI,MED1,MIB1,MRTFB,MTSS1,MYB,MYO1E,NCAPG2,NDEL1,NLE1,NOS3,OVOL2,PCDH12,PCGF2,PITX2,PLAC1,POLG2,RARRES2,…			GO: Biological Process	GO:0007417	central nervous system development	5.92001	ABAT,ABCB6,ACAN,ADAM22,ADCYAP1,AFDN,APOD,AQP1,ARID1A,ARL13B,ARNT2,ATP2B1,ATP2B4,ATP7A,ATRN,AVPR2,AXL,BAK1,BBS1,BBS4,BCL2,BID,BIN1,BMPR2,BPTF,BTBD3,BTD,BYSL,CALM1,CBLN1,CCDC14,CCDC141,CD9,CELSR2,CENPF,COL3A1,COX7B,CPLANE1,CXCR4,DCLK1,DLL4,DNER,DPYSL2,DUSP10,DYNC2H1,E2F1,EED,EFNA5,EGF,EML1,EMX2,ENPP2,EPHB2,FEZF2,FGF13,FGF8,FGFR3,GATA2,GCM1,GDF11,GNAQ,GNG12,H3F3B,HERC1,HNRNPD,HOOK3,HOXA1,HOXD10,HSPG…			GO: Biological Process	GO:0001667	ameboidal-type cell migration	5.3464	ACVR1,ADAM8,ALOX12,ARID5B,BAG4,C5orf30,CCN3,DAB2IP,DCN,EDN1,EDN3,EFNB2,FERMT1,FGF19,FGF4,GATA3,GPLD1,HAS1,HBEGF,HTR2B,ID1,IFNG,KITLG,LEFTY1,LEMD3,LRP5,NFE2L2,NR2E1,PHACTR4,PIP5K1A,PLXND1,PRKX,PRR5L,PTGS2,PTPRG,RET,SDC4,SEMA7A,SNAI2,SRC,STARD13			GO: Biological Process	GO:0023057	negative regulation of signaling	5.66708	ABL1,ACKR3,ACVR1C,ADGRA2,ADM,AGAP2,AJUBA,AKT1,ANXA5,AP1AR,AP2A2,AP2B1,ARAP3,ARNTL,ARRB1,ARRB2,ASIC1,BAG5,BAX,BDNF,BMF,C1QTNF3,CALM2,CARD19,CAV1,CD44,CDC34,CDH2,CHAC1,CILP,CLTA,CNOT9,CREB3L1,CRTC3,CRY1,CSNK1E,CTNNB1,CTTN,CUL3,CX3CL1,CXXC4,CYLD,CYP26A1,CYP26B1,DAND5,DAPK1,DDIT4,DGKZ,DKK1,DKK2,DLK2,DLL4,DLX1,DNM2,DUSP1,DUSP10,DUSP18,DUSP19,DUSP4,DUSP8,ERBIN,EZH2,EZR,FAIM,FAM89B,FBN2,FBP1,FBXW11,FGF2…			GO: Biological Process
GO: Biological Process	GO:0032940	secretion by cell	10	ABCC4,ACTN2,ADAM8,ADAM9,ADCYAP1,ADORA1,ADORA3,AIM2,AKAP5,ANGPT1,ANXA1,AP1G1,APLP2,APP,ARFGEF1,ARFGEF2,ARL2BP,ARNTL,ARRB1,ASIC1,ATG7,ATP6AP1,B4GALT1,BANK1,BCR,BDNF,BLOC1S6,BTN3A1,BTN3A2,C1QTNF3,CACNA1E,CACNA1G,CACNA2D2,CADM1,CALM2,CAMP,CASK,CBLN1,CCK,CCKAR,CCKBR,CCL5,CD2,CD34,CD9,CGA,CHRNA3,CHRNA4,CKLF,CLTRN,CNR1,CORO1A,CPLX1,CPT1A,CRH,CX3CL1,CYB5R4,DNM1L,DPYSL2,ECM1,EDN2,EGF,EPHA5,EXOC7,F8,FAM3B,…			GO: Biological Process	GO:0007267	cell-cell signaling	10	ABCC8,ADCYAP1,ADORA2A,ADORA3,AGTR2,AIMP1,APBA1,APLN,AR,ARF1,ARRB1,ATG7,ATXN1,ATXN3,BAD,BCAN,BDNF,BMP2,BMP3,BMP4,BTK,C1QTNF3,CACNA1B,CALCA,CAMK2B,CASR,CCL20,CCL21,CCL26,CCN5,CCR1,CD86,CEL,CGA,CHRNA10,CHRNA2,CHRNA4,CHRNA5,CHRNA9,CHRNB2,CHRNB3,CNIH2,CNIH3,CNTN2,CNTN4,CRHR2,CRY2,CX3CR1,CXCL11,CXCL13,DBI,DHH,DKK1,DLG2,DMPK,DNAJC5,DOC2A,DRD3,ECE2,EGR2,ENSA,ENY2,ETV5,FASLG,FGA,FGB,FGF12,FGF13,FGF17,FGF1…			GO: Biological Process	GO:0042060	wound healing	10	ACTB,ACTG1,ACTN1,ADAM17,ADAMTS18,AK3,AP3B1,ARFGEF1,C1GALT1C1,CAPZA1,CAV1,CBX5,CCM2L,CD34,CD59,CDH3,CELSR1,CNN2,COL5A1,DCN,DICER1,DOCK8,DOCK9,DSP,EHD1,ERBB3,F2,F9,FAP,FLNA,FZD6,GATA4,GNA14,HPS5,IGFBP1,IL1A,IL6,ITPR1,ITPR2,ITPR3,KDM1A,KRT6B,LBH,LCP1,LMAN1,LNPK,LOX,LYST,MFN2,MYH9,MYOF,NDNF,NOTCH1,NOTCH2,PABPC4,PDGFRB,PDPK1,PLCG2,PLSCR1,PRKCB,RAB27A,RAB5A,RBSN,REG3G,S100A9,SCRIB,SDC1,SERPINB2,SNAI2,S…			GO: Biological Process	GO:0000082	G1/S transition of mitotic cell cycle	5.4563	ADAM17,ANKRD17,APEX1,AURKA,BCL2,BRD4,BTG2,CABLES1,CACUL1,CAMK2B,CASP2,CCNB1,CDC45,CDC7,CDK10,CDK2,CDKN2A,CDT1,CENPJ,CHEK2,CNOT6L,CUL3,CUL4A,CYP1A1,E2F4,E2F6,EZH2,FBXO31,FBXO7,FGF10,GSPT1,ID2,IQGAP3,JADE1,KANK2,KIF14,LATS2,MCM10,MCM2,MCM6,MYB,NPAT,ORC1,ORC6,PLAGL1,PLK3,PML,POLA2,POLE2,PPAT,PPP3CA,PRIM1,PRMT2,PSME2,PSME3,RCC1,RFWD3,RHOU,RPS6KB1,RRM2,SENP2,SKP2,TFDP2,TP53,TYMS,UBE2E2			GO: Biological Process	GO:0051050	positive regulation of transport	5.82434	AACS,ABAT,ABCA1,ABCA7,ABCG1,ABLIM3,ADAM9,ADCYAP1,ADCYAP1R1,ADIPOR2,ADORA2B,ADORA3,AKAP6,AKAP7,AKT2,ALOX12B,ANXA13,AOC3,APBB1,AQP1,ARHGEF5,ARL6IP1,ASPH,ATP2C2,ATP8A2,AXL,AZU1,BAK1,BCL2,BID,BIN1,BMF,C3,CACNA1B,CACNA2D1,CACNB2,CALM1,CAMP,CARD8,CASK,CASP8,CAV1,CBLL1,CCK,CCKBR,CCR7,CD4,CD58,CD84,CDKL2,CEACAM1,CLIP3,CLTCL1,CTSK,CXCR4,CYB5R1,CYP4F2,DAB2,DDX58,DPYSL2,DTNBP1,E2F1,EDEM2,EDNRB,EGF,EHD1,EP30…			GO: Biological Process	GO:0018108	peptidyl-tyrosine phosphorylation	5.31099	ALK,APP,CCL5,CSF2,DYRK2,DYRK4,EPHA7,EPHB1,EPHB2,EREG,ERRFI1,FGF4,FGF6,FGF9,GPRC5B,HBEGF,HDAC2,HES1,IFNG,IFNL1,IGF1,IL13,IL22RA2,IL23R,IL5,IL6,INPP5F,JAK2,KITLG,LCK,LYN,MAP2K6,MELK,PDGFRA,PRLR,RET,RIPK2,ROS1,SAMSN1,SH2D1B,SRC,TNFRSF14,TTK,TXK			GO: Biological Process	GO:0090130	tissue migration	5.64324	ACTA1,ACTC1,ACTG2,ADAM8,ADAM9,ADGRA2,AKT1,BMP10,BMPR2,CXCL13,DLL4,EMP2,EPB41L4B,ETS1,FAP,FGF18,FGFR1,FLT4,FOXF1,GPLD1,GREM1,HAS2,HDAC5,HIF1A,HSPB1,ITGA2,ITGB1,LOXL2,NF1,NOTCH1,PAXIP1,PDPK1,PFN2,PKN1,PLCG1,PLEKHG5,PPARD,PRCP,PRKCE,PRKX,PROX1,PTEN,PTPN11,PTPN23,PTPRG,RAB11A,RHOA,ROCK2,S100A2,SASH1,SNAI2,SP100,SRC,SRF,SRPX2,STAT5A,STRAP,TGFBR1,VHL,ZEB2			GO: Biological Process
GO: Biological Process	GO:0040007	growth	10	ACSL4,ACTL6A,ADAM10,ADAM15,ADRA1B,ALCAM,ANXA1,APBA2,APOD,APP,ARHGAP4,ARMC10,ATP8A2,ATRN,AZGP1,BDNF,BMP2,BMP3,BMP5,BMP8B,BNC2,BNIPL,BTG1,C3,CACNA2D2,CADM1,CAMP,CD44,CDK11A,CGA,CGREF1,CGRRF1,CHRNA1,CLIC4,COL9A1,CREG1,CRIM1,CTDP1,CTSG,CYBA,CYFIP1,CYP27B1,DBN1,DCC,DCLK1,DDR2,DDX5,DHCR7,DISC1,DNPH1,DPYSL2,DSCAM,DUSP6,EAF2,EBAG9,EIF2B2,EPC1,ERBB2,ERBB4,ERCC2,ESM1,ESR1,ETNK2,EVC,FBP1,FDPS,FGF1,FGF13,FGF…			GO: Biological Process	GO:0048870	cell motility	10	ACTN4,ADGRA2,ADGRL3,ADORA3,AGTR2,AIMP1,AKT2,ALX1,ANKS1A,ANXA3,AP1AR,ARF4,ARSB,ATP8A1,AVL9,B4GALT1,BAMBI,BAX,BDKRB1,BMP10,BMP2,BMP4,BMP5,BMPR2,BRK1,BTG1,C1QBP,C3AR1,C5AR2,CALCA,CALR,CAMK2D,CARMIL1,CAV1,CCAR1,CCBE1,CCDC88A,CCL20,CCL21,CCL25,CCL26,CCNYL1,CCR1,CCR4,CCR7,CCSAP,CD244,CD47,CEMIP,CFL1,CGA,CHL1,CITED2,CLDN7,CLN3,CNTN2,CORO1A,CREB3,CTNNA2,CX3CR1,CXCL1,CXCL11,CXCL13,CXCL8,CXCR2,CXCR4,CXCR5,…			GO: Biological Process	GO:0030029	actin filament-based process	10	ACTA1,ACTG1,ACTN1,AKAP13,ALDOA,APBB2,ARF6,ARFGEF1,ARFIP1,ARHGAP17,ARHGAP28,ARHGEF10,ARPC5,ATXN3,AVIL,CACNA1C,CAPZA1,CAV1,CAVIN3,CCL24,CD2AP,CELSR1,CNN2,CORO2A,CTNNA1,DES,DSG2,DSP,DYNLL1,EMP2,EP300,EPB41L2,ESPN,EZR,FARP2,FAT1,FLII,FLNA,FLNB,FMN2,FRMD6,FRYL,FSCN1,GATA4,HSP90B1,IL1A,KANK2,KCNQ1,KIF23,KRT19,LCP1,LRP1,MARCKS,MEF2A,MICAL2,MICAL3,MRTFB,MYADM,MYH9,MYL6,MYO1E,MYO5A,MYO9B,NPHS2,PDGFRB,PDPK…			GO: Biological Process	GO:0040012	regulation of locomotion	5.44008	ABL1,ACTN4,ACVRL1,ADAM10,ADAM17,ADARB1,ADGRA2,ADORA3,AKT2,ALOX15B,AMOTL1,ANGPT1,ANO6,APEX1,APOE,APOH,ARHGAP4,ARHGEF39,ARRDC3,ATOH8,BBS1,BBS4,BCAS3,BCL2,BMP10,BTC,C16orf45,C5,C5AR2,CBLL1,CCAR1,CCBE1,CCL7,CCN1,CCR6,CDH1,CEACAM1,CEMIP,CGA,CIB1,CMKLR1,CREB3,CX3CR1,CXCL12,CXCL2,CXCL3,CXCL8,CYP19A1,DAB2,DACH1,DAG1,DIAPH1,DOCK10,DPEP1,DPYSL3,ELP5,EMP2,ENG,EPB41L5,EPHA2,EPHA3,ERBB3,EREG,ETS1,F7,FBXO31,FE…			GO: Biological Process	GO:0019216	regulation of lipid metabolic process	5.74855	ABCG1,ABHD6,ACER1,ADORA2B,AKR1C3,AKT2,APOB,APOC1,APOD,BBS4,C3,CAV1,CCKBR,CCR7,CEACAM1,DAB2,DDX20,DLAT,ERLIN2,FBXW7,FGF1,FGFR3,FLT1,FMC1,GFI1,GPAM,GPER1,GPR39,H2AFY,HTR2A,HTR2C,IGF1,IGF2,KIT,KLF4,KLK3,LDLRAP1,LPCAT1,MLYCD,NOD2,ORMDL1,PDK4,PDPR,PIK3CG,PIK3R1,PLA2G4A,PPARA,PPARG,PPARGC1A,PPP4R3B,PRKAA1,PRKAA2,PRKCE,RBL2,REST,RGN,SCD,SEC14L2,SERPINA3,SLC27A1,SLC45A3,SNAI1,SNAI2,TCF7L2,TEK,TRIB3,UGT1A…			GO: Biological Process	GO:0018212	peptidyl-tyrosine modification	5.25274	ALK,APP,CCL5,CSF2,DYRK2,DYRK4,EPHA7,EPHB1,EPHB2,EREG,ERRFI1,FGF4,FGF6,FGF9,GPRC5B,HBEGF,HDAC2,HES1,IFNG,IFNL1,IGF1,IL13,IL22RA2,IL23R,IL5,IL6,INPP5F,JAK2,KITLG,LCK,LYN,MAP2K6,MELK,PDGFRA,PRLR,RET,RIPK2,ROS1,SAMSN1,SH2D1B,SRC,TNFRSF14,TTK,TXK			GO: Biological Process	GO:0009628	response to abiotic stimulus	5.62228	AANAT,ACTA1,ADAM8,ADGRV1,ADM,AJUBA,AKT1,ANKRD2,ANKRD23,APP,ARRB1,ARRB2,ASIC1,ASNS,ATP1A1,B4GALT2,BACH1,BAD,BAG5,BAX,BNIP3L,BTG2,CA9,CACNA1E,CACNB4,CALM2,CAV1,CCN2,CD34,CD9,CDS2,CHI3L1,CNGA1,COL11A1,COL18A1,COL1A1,CREB1,CRY1,CSHL1,CTNNB1,CX3CL1,CXCR4,DDHD2,DDIT4,DEAF1,DENND5A,DENND5B,DHX9,DNAJA2,DNM2,DNMT3A,DNMT3B,DUSP1,EEF2K,EGLN2,EIF2AK3,ERCC4,ETS1,EYA3,F2,F3,FANCG,FECH,FKBP4,FOS,FOSL1,GADD45A,G…			GO: Biological Process
GO: Biological Process	GO:0048646	anatomical structure formation involved in morphogenesis	10	ABCC4,ACTN2,ADAM12,ADAM15,ADAM8,ADAM9,AGTPBP1,ANGPT1,ANPEP,APOD,ARID1A,ATF2,ATP8A2,AXIN2,B4GALT1,BBOF1,BBS9,BCL10,BMP2,BTG1,C1GALT1,C3,CAMP,CASP3,CASP9,CASQ2,CBLN1,CC2D2A,CCDC113,CCL2,CCL5,CCNB1IP1,CD34,CD44,CD9,CDH13,CELSR2,CEP41,CITED2,CLIC4,CLUAP1,CNOT1,COL15A1,COL2A1,COL4A1,COL4A2,COL5A1,COL5A2,CSPG4,CX3CL1,CXCL10,CXCL13,CXCL17,CXCL8,CXCL9,CXCR2,DCDC2,DISC1,DKK1,DKK4,DLL4,DLX5,DNAAF4,DNAAF5,D…			GO: Biological Process	GO:0070972	protein localization to endoplasmic reticulum	10	ANKRD13C,CHMP4A,RAB10,RAB3GAP1,RPL10,RPL15,RPL17,RPL19,RPL22,RPL23,RPL27,RPL27A,RPL28,RPL3,RPL31,RPL32,RPL34,RPL35A,RPL36,RPL37,RPL5,RPL9,RPS12,RPS13,RPS14,RPS16,RPS19,RPS2,RPS21,RPS24,RPS26,RPS3,RPS5,RPS6,RPS7,RPS8,SEC61G,SRP14,SSR3,UBA52			GO: Biological Process	GO:0006518	peptide metabolic process	10	AARS,ADAR,AGO1,ATF4,BCL3,BTG2,CCL5,CPA3,CPEB2,CPM,CYP1B1,DAPK1,DDX25,DICER1,DNAJC3,EEF2,EIF2AK2,EIF3B,EIF3D,EIF3H,EIF3I,EIF4A1,EIF4E3,EIF4G1,EIF4G3,ELAVL1,EP300,ERAP1,F2,F9,FAM129A,FMR1,FXR1,GAPDH,GCLM,GDAP1L1,HNRNPA2B1,IGF2BP3,IL6,IREB2,KARS,KRT17,LARS,LRRC47,LSM14A,METTL17,MKNK2,MRPL12,MRPL32,MRPL34,MRPL48,MRPL51,MRPS15,NCBP2,NCOR1,NCSTN,NFKB1,PABPC4,PAIP2,PER2,PINK1,POLDIP3,PPA1,PPP1CA,PTBP1,P…			GO: Biological Process	GO:0061458	reproductive system development	5.41574	ADCYAP1,AKR1C3,ALKBH1,ALOX15B,AMH,AMHR2,ANG,ANGPT1,BCL2,BCL2L11,BCL2L2,BIK,BMP15,CASP2,CCN1,CDH1,CGA,CSF2,CTNNB1,CYP17A1,CYP19A1,CYP27B1,DMC1,DMRT1,E2F8,EIF2B4,EIF2S2,EPAS1,EREG,ESR1,FGF10,FOSL1,FOXF2,FRS2,FST,FZD5,GAB1,GATA6,GDF9,HECTD1,HEY2,HMGCS1,HSD17B3,HSF1,HTRA1,ICAM1,IL1A,ING2,INSL6,KIT,LIF,LRP6,MAMLD1,MAP2K1,MAP3K4,MAPK1,MDFI,MED1,MGST1,NCOA4,NDP,NEFH,NOS3,NTRK1,OSR1,OVOL2,PCDH12,PGR,PITX…			GO: Biological Process	GO:0048729	tissue morphogenesis	5.73593	ACVR1,ADM,ALDH1A1,AP2B1,ARID1A,ARL13B,ATP7A,ATP8A2,BAK1,BBS4,BCL2,BMPR2,CALB1,CASP8,CASZ1,CCM2L,CEACAM1,CELSR2,CLIC4,CLTC,COBL,COL3A1,CPLANE1,CTHRC1,CTSZ,CXCR2,CXCR4,DAB2,DLL4,DSP,EGF,ENAH,FAT3,FGF1,FGF8,FGFR3,FLNA,FLT1,FOXF2,FRAS1,GCM1,GCNT3,GNA13,GPC6,GREM1,GRSF1,GZF1,HBEGF,HDAC5,HECTD1,HEYL,HIPK2,HOXB13,HOXD13,IFT172,IGF1,IL6,IRX5,ISL1,KLF4,KLK3,KRAS,KRT17,KRT25,LAMA5,LRP5,LUZP1,MAN2A1,MED1,ME…			GO: Biological Process	GO:0045597	positive regulation of cell differentiation	5.24536	ACVR1,ACVR2B,ADAM8,ALOX12,ANKRD27,APBB1,ATP8A2,BCL11A,BCL6,BLOC1S6,BNIP2,BRINP3,CCL5,CCN2,CDON,CSF2,CX3CL1,CYLD,CYP26B1,DAB2IP,DPYSL3,ECT2,EDN1,EDN3,EFNB2,EPC1,EPHB2,FGB,FOXA1,GATA3,GPRC5B,H2AFY,HDAC2,HES1,HEY1,HLX,ID2,IFNG,IGF1,IL13,IL23R,IL2RA,IL5,IL6,JAK2,KITLG,LCK,LIG4,LMO3,LRP5,LYN,MEF2A,MMP14,MSR1,MYB,NDNF,NET1,NFE2L2,PALM,PAX4,PDE3A,PROM1,PTGS2,RB1,RET,RIMS1,RIPK2,RRN3,RTN4,S100A10,SCIN,SD…			GO: Biological Process	GO:0045787	positive regulation of cell cycle	5.51398	ABL1,AKT1,APP,ARID3A,ASNS,BAX,BTG2,CARM1,CCN2,CCNC,CCNL2,CCNT1,CCNY,CDC6,CDK10,CENPE,CIT,CNOT3,CNOT7,CNOT9,CUL3,DBF4B,DMRT1,EIF4G3,FAP,FGFR1,FOSL1,GADD45A,GPER1,HOXA13,ID2,IL1B,KIF14,KIF3B,LEF1,LMNB1,LSM11,MEPCE,MTA3,MTBP,PAFAH1B1,PCBP4,PCID2,PEBP1,PHIP,PIDD1,PIM1,PKD2,PLK2,POU4F1,PPP1R1C,PPP2R5B,PRKCE,PROX1,PSMD10,PTPN11,RAB11A,RAB11FIP4,RANBP1,RASSF1,RDX,RHOA,ROCK2,SFPQ,SLC6A4,SLF1,SOX15,SRC,ST…			GO: Biological Process
GO: Biological Process	GO:0072358	cardiovascular system development	10	ACTA2,ACTN2,ADAM15,ADAM19,ADAM8,ADAMTS6,ADRA1B,ANGPT1,ANKRD17,ANKS6,ANPEP,APOB,APOD,ARID1A,ATF2,ATG7,AXIN2,B4GALT1,BMP2,BTG1,C1GALT1,C3,CACYBP,CAD,CALCA,CAMP,CASP3,CC2D2A,CCL2,CCL5,CD34,CDH13,CDH2,CDH5,CDKL1,CHRNA3,CITED1,CITED2,CLIC4,CLUAP1,COL15A1,COL2A1,COL3A1,COL4A1,COL4A2,COL5A1,CSPG4,CTDP1,CUL7,CX3CL1,CXCL10,CXCL13,CXCL17,CXCL8,CXCR2,DCTN5,DHCR7,DKK1,DLL4,DNAAF4,DSG2,DUSP6,ECM1,EFNB2,EGF,EG…			GO: Biological Process	GO:1901566	organonitrogen compound biosynthetic process	10	AANAT,ACOT7,ADCY4,ADCYAP1,ADI1,ADORA2A,AGO1,AGO4,AGTR2,AGXT2,AIMP1,AKAP6,AKT2,ALDH3B2,ASS1,ATF4,ATG7,ATP5F1C,ATP5IF1,ATP5MC2,ATP5MC3,ATP5MF,B3GAT1,B3GNT4,B3GNT7,B4GALT1,B4GALT4,B4GALT6,BBOX1,BCAN,BCAT1,BCL3,BHMT2,BOLL,C1QBP,C20orf173,CALCA,CALR,CARNS1,CEMIP,CEPT1,CHCHD1,CHST11,CHST5,CLN8,CNOT7,COL4A3BP,CPEB2,CRHR2,CSGALNACT2,CTPS1,DAP3,DAPK3,DARS,DCK,DDX3Y,DMAC2L,DRD3,EEF1B2,EEF1D,EEF2,EIF1,EIF2A…			GO: Biological Process	GO:0090101	negative regulation of transmembrane receptor protein serine/threonine kinase signaling pathway	10	ADAM17,CAV1,CAV2,CHRDL1,CHRDL2,FBN1,FBN2,FSTL3,GLG1,HIPK2,HTRA1,MTMR4,NOTCH1,ONECUT2,PDPK1,SIRT1,SMAD7,SNX25,STRAP,SYNJ2BP,TGFB3,TGFBR2,TGFBR3,TRIM33,TWSG1			GO: Biological Process	GO:0048514	blood vessel morphogenesis	5.39869	ACVRL1,ADGRA2,ADGRB1,ADIPOR2,AIMP1,ANG,ANGPT1,APOE,APOH,BCAS3,C3,C5,CCBE1,CCN1,CCR3,CDC42,CEACAM1,CIB1,COL4A2,CTNNB1,CX3CR1,CXCL12,CXCL8,CYBB,E2F8,EIF2AK3,ELK3,EMP2,ENG,EPAS1,EPHA2,EPHB4,EREG,ETS1,FGF10,FGF18,FGF6,FGFR1,FMNL3,FOXF1,FZD5,GATA6,GNA13,GPLD1,HEY2,HIF3A,HIPK1,HMOX1,HRG,HSPB1,ID1,IHH,IL1A,IL6,KLK3,KRT1,LAMA1,LAMA5,LEMD3,LIF,MAPK7,MCAM,MED1,MRTFB,MTDH,MYO1E,NDNF,NEDD4,NGFR,NOS3,NOX1,NPR…			GO: Biological Process	GO:0001932	regulation of protein phosphorylation	5.55348	ABCA7,ACKR3,ACVR1,ADAM9,ADAR,ADARB1,ADCY3,ADCY4,ADCY6,ADCY7,ADCYAP1,ADNP,ADORA2B,AKAP6,AKT1S1,AKT2,ALOX12B,ARHGEF5,ATP2B4,ATP6AP2,AZU1,BAK1,BCAR3,BCL2,BIRC7,BMPR2,C3,CALM1,CAMP,CAV1,CCK,CCL17,CCL25,CCL7,CCNE2,CCNG1,CCR7,CD4,CD6,CD84,CDC25B,CDK2AP1,CDK9,CDKN2A,CEACAM1,CHORDC1,CLIP3,CLSPN,CSNK1D,CTF1,CXCR4,DAB2,DIRAS1,DIRAS3,DNAJC10,DNAJC3,DSTYK,DTNBP1,DUSP1,DUSP10,DUSP18,DUSP2,EDNRB,EFNA5,EGF,EIF2…			GO: Biological Process	GO:0031175	neuron projection development	5.22418	ACSL4,ANKRD27,ANOS1,APBB1,APP,ARF6,ATP7A,ATP8A2,B3GNT2,BCL11A,BLOC1S6,CALU,CAMSAP2,CCDC88A,CHODL,CLMN,CNTN4,CNTNAP2,DAB2IP,DCDC2,DPYSL3,EFNB2,EPHA7,EPHB1,EPHB2,FLRT3,FRY,GATA3,GPM6A,GPRC5B,HDAC2,HES1,ID1,IL6,INPP5F,ITM2C,JAK2,KRAS,LGI1,LINGO1,LYN,LZTS1,MAPK1,MAPK8,MEF2A,MICALL1,NCS1,NDNF,NFE2L2,NR2E1,NR4A2,NREP,NRXN1,NTM,OMG,PALM,PLK2,PLXND1,PTPRG,RAPGEF4,RAPH1,RB1,RET,RIMS1,RRN3,RTN4,SDK1,SEMA7A…			GO: Biological Process	GO:0016477	cell migration	5.45745	ACVR1C,ADAM8,ADAM9,ADARB1,ADGRA2,AJUBA,AKT1,ANKS1A,AOC3,ARAP3,ARHGAP4,ARHGDIB,ARHGEF39,ARL13B,ARPC2,ARRB2,ASAP3,ATP1B3,ATP8A1,BAX,BIN3,BMP10,BMPR2,C5orf30,CAV1,CCDC88A,CCN1,CCN2,CCR1,CD34,CD44,CD47,CDH2,CELSR2,CLIC4,CLN3,CMKLR1,COL18A1,COL1A1,CPNE3,CSF1R,CTNNB1,CTTN,CUL3,CUZD1,CX3CL1,CXCL13,CXCL14,CXCL5,CXCR4,DDIT4,DGKZ,DIAPH1,DLL4,DMRT1,DOCK4,DOK2,EMP2,EPB41L4B,ESAM,ETS1,F2,F3,FAP,FERMT3,FGF18,F…			GO: Biological Process
GO: Biological Process	GO:0030030	cell projection organization	10	ABCC4,ABI2,ACSL4,ACTB,ACTN2,ACTR3,ADCYAP1,AKAP5,ALCAM,ANKRD27,APOD,APP,ARFGEF1,ARHGAP4,ARHGEF1,ARPC2,ATF1,ATG7,ATL1,ATP8A2,AVIL,BAG4,BAIAP2,BBOF1,BBS9,BCL11B,BDNF,BLOC1S6,BMP5,C5orf30,CAPG,CAPZB,CC2D2A,CCDC113,CCK,CCKAR,CCL5,CD2AP,CD44,CDC20,CDC42EP1,CDC42EP4,CDH11,CDH13,CDH2,CELSR2,CEP41,CHN1,CHRNA3,CIT,CLIC5,CLN3,CLUAP1,CNGB1,CNR1,CNTN2,CORO1A,CORO1B,CROCC,CSPG4,CUL7,CUX1,CYFIP1,DBN1,DCC,DCDC2,…			GO: Biological Process	GO:0040012	regulation of locomotion	10	ACTN4,ADGRA2,ADORA2A,ADORA3,AGTR2,AKT2,ANXA3,AP1AR,ARRDC3,ARSB,ATP8A1,BDKRB1,BMP10,BMP2,BMP4,BMP5,BMPR2,C1QBP,C3AR1,C5AR2,CALR,CAMK2D,CARMIL1,CASR,CAV1,CCAR1,CCBE1,CCL20,CCL21,CCL25,CCL26,CCR1,CCR4,CCR7,CCSAP,CEMIP,CGA,CITED2,CLDN7,CORO1A,CREB3,CX3CR1,CXCL1,CXCL11,CXCL13,CXCL8,CXCR2,CXCR4,DAPK2,DAPK3,DPYSL3,DRD3,EGFL7,FCN1,FCN3,FES,FGA,FGF1,FGF18,FGFR1OP,FGR,FLRT2,FOXF1,FURIN,GAB2,GCNT2,GCSAML,GL…			GO: Biological Process	GO:0060341	regulation of cellular localization	10	ACVR1C,ADCYAP1,AIM2,ANO1,AP2M1,ARF6,ARFIP1,ARL2BP,ATP5IF1,BBC3,BCL2L11,BCL3,BIRC5,BMF,CACNA1C,CALM2,CAV1,CAV2,CCL5,CCT3,CCT7,CCT8,CD2AP,CD34,CDH3,CELSR1,CHD7,CLOCK,CLTRN,CREB3,CREBRF,CRY1,CSK,CXCL11,CYLD,DAB2,DDX58,DHRS7C,DNAJC13,DYNLL1,EDAR,EDEM2,EHD1,EP300,EZR,F2,FGF23,FLNA,FMR1,FOXP1,GAL,GALR1,GBF1,GBP1,GLUD1,HECTD1,HES1,HNRNPM,HSP90AB1,HTR2B,HUWE1,IL1A,IL6,INHBA,IPO5,ITPR1,ITPR2,ITPR3,JPH1,KC…			GO: Biological Process	GO:0045859	regulation of protein kinase activity	5.3404	ABL1,ACSL1,ADAM17,ADARB1,ADCY6,ADCY9,ADCYAP1,AFAP1L2,AKAP13,ANAPC10,ANG,ANGPT1,APOE,ARHGEF5,AVPI1,AXIN1,BCCIP,C5,CACUL1,CAMK1,CAMK2N1,CAMKK2,CARD14,CCN1,CCNA2,CCND3,CCNY,CD4,CDC25B,CDC42,CDK5R1,CDKN2A,CEACAM1,CEMIP,CEP85,CIB1,CKS2,CRKL,CSK,CUL3,DAB1,DAB2,DBNL,DEPTOR,DIRAS1,DIRAS2,DIRAS3,DNAJA3,DTNBP1,DUS2,DUSP1,DUSP14,DUSP2,DUSP3,DVL3,EFNA5,EIF2AK2,ELP4,EMP2,ERBB3,EREG,EZH2,FBXO31,FBXO7,FGF10,FGF…			GO: Biological Process	GO:0060322	head development	5.54828	ABAT,ABCB6,ADCYAP1,AFDN,APOD,AQP1,ARID1A,ARID5B,ARL13B,ARNT2,ASPH,ATP2B1,ATP2B4,ATP6AP2,ATP7A,ATRN,AVPR2,AXL,BAK1,BBS1,BBS4,BCL2,BID,BMPR2,BPTF,BTBD3,BYSL,CALM1,CBLN1,CCDC14,CCDC141,CD9,CDK2AP1,CELSR2,CENPF,COL1A1,COL3A1,CPLANE1,CRISPLD1,CXCR4,DCLK1,DLX6,DPYSL2,DYNC2H1,E2F1,EFNA5,EGF,EML1,EMX2,EPHB2,FEZF2,FGF13,FGF8,FGFR3,GATA2,GNAQ,GNG12,H3F3B,HERC1,HNRNPD,HOOK3,HOXA1,HSPG2,HTR6,IFT172,IGF1,IGF2…			GO: Biological Process	GO:0048666	neuron development	5.1698	ACSL4,ALK,ANKRD27,ANOS1,APBB1,APP,ARF6,ATP7A,ATP8A2,ATP8B1,B3GNT2,BCL11A,BLOC1S6,CALU,CAMSAP2,CCDC88A,CHODL,CLIC5,CLMN,CNTN4,CNTNAP2,DAB2IP,DCDC2,DPYSL3,EFNB2,EPHA7,EPHB1,EPHB2,FLRT3,FRY,GABRB1,GATA3,GPM6A,GPRC5B,HDAC2,HES1,HEY1,HOXD10,ID1,ID2,IL6,INPP5F,ITM2C,JAK2,KRAS,LGI1,LINGO1,LYN,LZTS1,MAPK1,MAPK8,MEF2A,MICALL1,NCS1,NDNF,NFE2L2,NR2E1,NR4A2,NREP,NRXN1,NTM,OMG,PALM,PLK2,PLXND1,PTPRG,RAPGEF4,R…			GO: Biological Process	GO:0010648	negative regulation of cell communication	5.40737	ABL1,ACKR3,ACVR1C,ADGRA2,ADM,AGAP2,AJUBA,AKT1,ANXA5,AP2A2,AP2B1,ARAP3,ARNTL,ARRB1,ARRB2,ASIC1,BAG5,BAX,BDNF,BMF,C1QTNF3,CALM2,CARD19,CAV1,CD44,CDC34,CDH2,CHAC1,CILP,CLEC16A,CLN3,CLTA,CNOT9,CREB3L1,CRTC3,CRY1,CSNK1E,CTNNB1,CTTN,CUL3,CX3CL1,CXXC4,CYLD,CYP26A1,CYP26B1,DAND5,DAPK1,DDIT4,DGKZ,DKK1,DKK2,DLK2,DLL4,DLX1,DNM2,DUSP1,DUSP10,DUSP18,DUSP19,DUSP4,DUSP8,ERBIN,EZH2,EZR,FAIM,FAM89B,FBN2,FBP1,FBXW…			GO: Biological Process
GO: Biological Process	GO:0061564	axon development	10	ACTB,ALCAM,APOD,APP,ARHGAP4,ARHGEF1,ATG7,ATL1,ATP8A2,BAIAP2,BCL11B,BDNF,CCK,CCKAR,CDH11,CDH2,CHN1,CNR1,CNTN2,CYFIP1,DBN1,DCC,DCLK1,DISC1,DLX5,DPYSL2,DPYSL5,DSCAM,ECM2,EFNA3,EFNA4,EFNB2,EIF2B2,EPHA5,ERBB2,ETV1,ETV4,EVL,EXT1,FBXO45,FEZ1,FEZ2,FGF13,FKBP1B,FLRT3,FMOD,FYN,FZD3,GDI1,GFRA3,GLI2,GPC1,GRIN1,GSK3B,HDAC6,HOXA1,ISL2,JAK2,KIF26A,KIF26B,KIF5A,KLF4,KLK8,KRAS,L1CAM,LGI1,LRFN1,LRFN5,LRP4,LRRN1,LR…			GO: Biological Process	GO:0030182	neuron differentiation	5.932	ABI1,ACTR3,ADCYAP1,ADGRV1,ADORA2A,ALG10,ANKRD27,ANKS1A,ARF1,ARF4,ARHGAP35,ARSB,ATF5,ATG7,ATL1,BCL11A,BDNF,BMP2,BMP4,BMP5,BMPR1B,BMPR2,BRINP3,CALR,CAMK2B,CAV1,CCDC88A,CCSAP,CDH11,CDH4,CDK5RAP2,CDKL3,CDKN1C,CFL1,CHL1,CHRNB2,CLMN,CLN8,CNGA3,CNTN2,CNTN4,COPS2,CRMP1,CSNK1E,CTDSP1,CTNNA2,CXCR4,DAPK3,DDIT4,DGKG,DKK1,DLG2,DMRT3,DNMT3A,DPYSL2,DPYSL3,EGR2,ENC1,EOMES,EPHB3,ETV5,EYA1,EZH2,FARP2,FAT3,FES,FGF1…			GO: Biological Process	GO:1901566	organonitrogen compound biosynthetic process	10	AARS,ACOT7,ADAR,ADCYAP1,AGO1,AK3,ALAD,ALAS1,ALDH18A1,ALDOA,ARG2,ASNS,ATF4,ATP5F1A,ATP5IF1,ATP5MC3,ATP5MG,ATP6V0A2,ATP7A,B3GNT2,BBOX1,BCAT2,BCL3,BTG2,CAD,CALM2,CCL5,CERS2,CHST15,CHST7,CPEB2,CPS1,CSGALNACT1,CSNK1G2,CSPG4,CYP1B1,DAPK1,DCN,DDX25,DICER1,DNAJC3,DSEL,EEF2,EIF2AK2,EIF3B,EIF3D,EIF3H,EIF3I,EIF4A1,EIF4E3,EIF4G1,EIF4G3,ELAVL1,EP300,FA2H,FAM129A,FMR1,FXR1,GALR1,GAPDH,GCH1,GCLM,GLCE,GLUD1,GOT2…			Pathway	83105	Pathways in cancer	4.43496	ABL1,ADCY6,ADCY9,AKT2,APC2,ARNT2,AXIN1,BCL2,BIRC5,CASP9,CBL,CCDC6,CDC42,CDH1,CDK2,CDKN2A,CKS2,COL4A2,COL4A4,CRKL,CTNNB1,CXCL12,CXCL8,DAPK1,DVL3,E2F3,EDNRB,EPAS1,ETS1,FGF10,FGF11,FGF18,FGF20,FGF6,FGFR1,FOXO1,FZD5,GLI1,GLI3,GNA11,GNA12,GNA13,GNB4,GNG12,GNG3,IL6,ITGA3,JUP,KIT,KLK3,LAMA1,LAMA2,LAMA4,LAMA5,LAMB1,LAMB3,LAMC3,LPAR2,LPAR3,LPAR6,MAP2K1,MAPK1,MLH1,NCOA4,NFKB1,NTRK1,PDGFA,PIK3R1,PML,PRKACB,…			GO: Biological Process	GO:0009790	embryo development	5.53767	ABCG2,ACVR1,ADAR,ADM,ALDH1A1,ALX3,APBA3,APOB,ARFRP1,ARID1A,ARL13B,ARNT2,ATP6AP2,ATP6V1B1,ATP7A,ATP8A2,BBS4,BCL2L1,BMPR2,BPTF,BYSL,C2orf49,CASP8,CCSAP,CDK2AP1,CHRNA9,COBL,COL12A1,COL1A1,CPLANE1,CREBBP,CTHRC1,CXXC4,DAB2,DLL4,DLX6,DMRT2,DNMT3A,DNMT3L,DUSP1,DUSP2,DYNC2H1,ENAH,EP300,EPHB2,EYA4,FBN1,FBN2,FGF8,FLT1,FOXF2,FRAS1,GATA2,GCM1,GFI1,GINS4,GJB3,GNA13,GNAQ,GREM1,GRIN2B,GRSF1,HBEGF,HECTD1,HIPK2,H…			GO: Biological Process	GO:1904019	epithelial cell apoptotic process	5.16631	AKR1C3,ARF6,DAB2IP,FGB,GATA3,HMOX1,IGF1,IL13,IL6,JAK2,MAPK8,MST1,NDNF,NFE2L2,RB1,STK3,TIA1,TNIP2			GO: Biological Process	GO:0007265	Ras protein signal transduction	5.32698	ABRA,ALS2,ARAP3,ARHGAP4,ARHGDIB,ARHGEF1,ARHGEF12,ARHGEF17,ARHGEF19,ARHGEF39,ARRB1,CDC42EP2,CDH2,CRK,CUL3,CYTH4,DBNL,DGKZ,DHCR24,DNM2,DOK2,ERBB2,FBP1,FGD1,FGD5,GBF1,GDI1,GNB1,GRAP,HACD3,HRAS,IQSEC3,ITGB1,ITPKB,KIF14,KITLG,MAPKAPK2,MAPKAPK3,MCF2L,MRAS,NET1,NF1,NISCH,NUP62,OGT,PARK7,PLEKHG1,PLEKHG3,PLEKHG5,PLK2,PPP2CB,PSD3,PSD4,RAB4A,RABGEF1,RALGDS,RAP2A,RAPGEF2,RAPGEF6,RASAL1,RASGRP2,RASSF1,RDX,RFX…			GO: Biological Process
GO: Biological Process	GO:0048666	neuron development	10	ABI2,ACSL4,ACTB,ACTR3,ADCYAP1,AKAP5,ALCAM,ALK,ANKRD27,APOD,APP,ARFGEF1,ARHGAP4,ARHGEF1,ATF1,ATG7,ATL1,ATP8A2,AVIL,BAIAP2,BCL11B,BDNF,BLOC1S6,BMP5,CAPZB,CCK,CCKAR,CD44,CDC20,CDH11,CDH2,CELSR2,CHN1,CHRNA3,CIT,CLIC5,CNGB1,CNR1,CNTN2,CSPG4,CTF1,CUL7,CUX1,CYFIP1,DBN1,DCC,DCDC2,DCLK1,DGKG,DGUOK,DISC1,DLX5,DPYSL2,DPYSL5,DSCAM,ECM2,EDNRB,EFNA3,EFNA4,EFNB2,EIF2B2,EPHA5,EPOR,ERBB2,ETV1,ETV4,EVL,EXT1,FBXO45…			GO: Biological Process	GO:0043043	peptide biosynthetic process	5.89149	AGO1,AGO4,AIMP1,AKT2,ATF4,BCL3,BOLL,C1QBP,CALR,CARNS1,CHCHD1,CNOT7,CPEB2,DAP3,DAPK3,DARS,DDX3Y,EEF1B2,EEF1D,EEF2,EIF1,EIF2AK1,EIF2B3,EIF2S2,EIF3B,EIF3D,EIF3E,EIF3H,EIF3M,EIF5A2,ENC1,FAM129A,FURIN,GAPDH,GATC,GGT5,GTPBP1,HNRNPA2B1,HNRNPD,HNRNPL,IGF1,IGF2BP1,IGF2BP2,IGFBP5,ILF3,KARS,KLK3,KRT17,LARP6,LSM14B,MALSU1,MIF4GD,MKNK2,MMP7,MRPL1,MRPL13,MRPL15,MRPL35,MRPL36,MRPL41,MRPL48,MRPL50,MRPL51,MRPL53,…			GO: Biological Process	GO:0043069	negative regulation of programmed cell death	10	AARS,ADAM17,ADAR,ADCYAP1,APBB2,ARL6IP1,ASNS,ATP7A,BCL10,BCL3,BEX3,BIRC5,BMF,BTG2,CAV1,CCL5,CCNG1,CD59,CHD8,CREB3,CTNNA1,DAB2,DAPK1,DNAJC3,DOCK8,EFNA1,EIF2AK2,EP300,ERBB3,FLNA,FMN2,FOXP1,G2E3,GCLM,HERPUD1,HIPK2,HMGA2,HMGB2,HSP90AB1,HSP90B1,HSPA8,HTR2B,HYOU1,IL1A,IL6,IRAK1,KANK2,KDM1A,KDR,KLF4,LEF1,LGALS3,LIMS1,LMNA,LRP1,MDK,MDM4,MECP2,MSH2,MYOCD,NAA38,NCL,NCOA3,NDNF,NFKB1,NGFR,NOC2L,NONO,NOTCH1,NO…										GO: Biological Process	GO:0033993	response to lipid	5.53727	AACS,ABCA1,ABCC2,ABCG1,ABCG2,ACVR1,ADAM9,ADAMTS1,ADCY3,ADCY6,ADCYAP1,ADCYAP1R1,ADH5,ADM,ADNP2,AKR1C2,AKR1C3,APOB,AQP1,ARID1A,ARNT2,ASH2L,ATP2B1,ATP4B,AXL,BCL2,BID,BUD31,BYSL,C3,CACNA1B,CALCR,CALM1,CASP8,CASP9,CAV1,CCR7,CD4,CD55,CD6,CD84,COL1A1,CPS1,CRHBP,CRYAB,CXCL1,CXCL16,CXCL3,DAB2,DNMT3A,DUSP1,DUSP10,E2F1,EDNRB,EFNA5,EIF2AK2,EP300,ERBIN,ESRRG,FCGR3A,FHL2,FKBP4,FMO1,FOS,FOSB,GATA2,GBP2,GC,GDAP1…			Pathway	83114	Melanoma	4.47221	CCND1,CDKN1A,E2F3,FGF11,FGF19,FGF4,FGF6,FGF9,IGF1,KRAS,MAPK1,MITF,PDGFRA,RB1			GO: Biological Process	GO:0031175	neuron projection development	5.30856	ABL1,ACSL4,ACTR3,ADCY6,ADCYAP1,ADM,AHI1,AKT1,ALS2,APOA5,APP,ARHGAP4,ARHGEF1,ATP7A,ATXN10,B3GNT2,BAG5,BDNF,BLOC1S6,BMPR2,BTBD3,BTG2,CALU,CAMSAP2,CARM1,CCDC88A,CD44,CDC20,CDH2,CDK16,CELSR2,CHODL,CIT,CNTNAP1,COL25A1,CREB1,CSF1R,CTTN,CXCR4,DBN1,DBNL,DIAPH1,DNM2,EEF2K,EFNA4,EHD1,ELAVL4,ENAH,EPB41L3,EPHA7,EPHB2,EPOR,ERBB2,EZH2,EZR,FGFR1,FKBP1B,FKBP4,FMOD,FRY,GDI1,GIT1,GLI3,GPC1,GPRC5B,HDAC2,HDGFL3,HRAS…			GO: Biological Process
GO: Biological Process	GO:0031344	regulation of cell projection organization	10	ACTR3,ADCYAP1,AKAP5,ANKRD27,ARHGAP4,ARHGEF1,ARPC2,ATF1,ATP8A2,AVIL,BAIAP2,BDNF,BMP5,CAPZB,CDC20,CDC42EP1,CDC42EP4,CDH2,CHN1,CHRNA3,CIT,CLN3,CNR1,CNTN2,CORO1B,CSPG4,CUL7,CUX1,DBN1,DCC,DCDC2,DGUOK,DISC1,DPYSL2,DSCAM,EIF2B2,ENPP2,EPOR,EPS8L2,EVL,FEZ1,FGF13,FIG4,FKBP1B,FMOD,FNBP1L,FYN,GDI1,GPRC5B,GRIN1,GSK3B,HLA-A,HNF4A,HNRNPK,IFT140,IFT46,IFT88,IL1RAP,IL1RAPL1,IL6,ITGA3,ITM2C,KANK1,KIAA0319,KIF3C,KL…			GO: Biological Process	GO:0000184	nuclear-transcribed mRNA catabolic process, nonsense-mediated decay	5.83533	DCP1A,EIF3E,PPP2CA,RPL10,RPL15,RPL17,RPL19,RPL22,RPL23,RPL27,RPL27A,RPL28,RPL3,RPL31,RPL32,RPL34,RPL35A,RPL36,RPL37,RPL5,RPL9,RPS12,RPS13,RPS14,RPS16,RPS19,RPS2,RPS21,RPS24,RPS26,RPS3,RPS5,RPS6,RPS7,RPS8,UBA52			GO: Biological Process	GO:0071407	cellular response to organic cyclic compound	10	ADAR,ADCYAP1,AGO1,AKAP13,AQP9,ARID1A,CARM1,CAV1,CCL5,CLOCK,CPS1,CREBRF,CRY1,CTNNA1,CYP1B1,DAB2,DICER1,DNMT3B,EP300,ESRRG,EZR,FGF23,FOXP1,GABRB1,HNRNPA2B1,HNRNPU,HSP90AB1,HSP90B1,HTR2B,IFIT1,IL6,INHBA,ITPR1,ITPR2,ITPR3,KANK2,KCNQ1,KLF2,KLF4,KLF9,LEF1,MED12,MED4,MSN,NCOA2,NCOA3,NCOR1,NEDD4,NFKB1,NR2F6,NR4A2,PARK7,PDE2A,PDE3A,PELP1,PIM1,PLPP1,PTCH1,PTGES3,RALB,RBFOX2,RNF6,RORC,SHMT1,SIN3A,SIRT1,SLC9…			Cluster [-0.09:0.224]							GO: Biological Process	GO:0006629	lipid metabolic process	5.51694	AACS,ABCA1,ABCD3,ABCG1,ABHD6,ACAD8,ACER1,ACOT12,ACOX1,ACOX2,ADH5,ADIPOR2,ADM,ADORA2B,AGPAT3,AGPS,AKR1C1,AKR1C2,AKR1C3,AKT2,ALDH1A1,ALDH3B2,ALG13,ALG2,ALG5,ALG9,ALOX12B,APOB,APOBEC1,APOC1,APOC4,APOD,APOF,APOL2,ARF3,ARSJ,ASAH1,ASAH2,ATP8B1,BBS1,BBS4,BCO1,BCO2,C3,CAV1,CCKBR,CCR7,CDS2,CEACAM1,CEPT1,CERS4,CNBP,CPS1,CREBBP,CREM,CYB5R1,CYP11B1,CYP19A1,CYP1B1,CYP2A7,CYP2R1,CYP4F2,DAB2,DAGLB,DDX20,DEGS1,D…			Pathway	1510435	Ferroptosis	4.15554	ACSL4,ALOX15,GCLM,HMOX1,MAP1LC3B,SLC39A14,SLC39A8,SLC3A2,SLC7A11,VDAC2			Pathway	172847	Protein digestion and absorption	4.27845	ATP1A1,ATP1B3,COL11A1,COL14A1,COL15A1,COL17A1,COL18A1,COL1A1,COL21A1,COL24A1,COL27A1,COL4A4,COL5A3,COL6A5,COL9A3,CPA2,CTRB1,CTRL,KCNN4,KCNQ1,MEP1A,MME,PRCP,SLC15A1,SLC38A2,SLC3A1,SLC7A9			GO: Biological Process
GO: Biological Process	GO:0031175	neuron projection development	10	ABI2,ACSL4,ACTB,ACTR3,ADCYAP1,AKAP5,ALCAM,ANKRD27,APOD,APP,ARFGEF1,ARHGAP4,ARHGEF1,ATF1,ATG7,ATL1,ATP8A2,AVIL,BAIAP2,BCL11B,BDNF,BLOC1S6,BMP5,CAPZB,CCK,CCKAR,CD44,CDC20,CDH11,CDH2,CELSR2,CHN1,CHRNA3,CIT,CNR1,CNTN2,CSPG4,CUL7,CUX1,CYFIP1,DBN1,DCC,DCDC2,DCLK1,DGUOK,DISC1,DLX5,DPYSL2,DPYSL5,DSCAM,ECM2,EFNA3,EFNA4,EFNB2,EIF2B2,EPHA5,EPOR,ERBB2,ETV1,ETV4,EVL,EXT1,FBXO45,FEZ1,FEZ2,FGF13,FIG4,FKBP1B,FLR…			GO: Biological Process	GO:0006412	translation	5.81743	AGO1,AGO4,AIMP1,AKT2,ATF4,BCL3,BOLL,C1QBP,CALR,CHCHD1,CNOT7,CPEB2,DAP3,DAPK3,DARS,DDX3Y,EEF1B2,EEF1D,EEF2,EIF1,EIF2AK1,EIF2B3,EIF2S2,EIF3B,EIF3D,EIF3E,EIF3H,EIF3M,EIF5A2,ENC1,FAM129A,GAPDH,GATC,GTPBP1,HNRNPA2B1,HNRNPD,HNRNPL,IGF1,IGF2BP1,IGF2BP2,IGFBP5,ILF3,KARS,KRT17,LARP6,LSM14B,MALSU1,MIF4GD,MKNK2,MRPL1,MRPL13,MRPL15,MRPL35,MRPL36,MRPL41,MRPL48,MRPL50,MRPL51,MRPL53,MRPS10,MRPS15,MRPS17,MRPS21,…			GO: Biological Process	GO:0007010	cytoskeleton organization	10	ABLIM1,ACTA1,ACTG1,ACTN1,AKAP13,ALDOA,ARF6,ARFGEF1,ARFIP1,ARHGAP17,ARHGAP28,ARHGEF10,ARPC5,ATXN3,AVIL,BICD2,BIRC5,BRCA2,BRWD1,CAMSAP1,CAMSAP2,CAPZA1,CAV1,CAVIN3,CCL24,CD2AP,CELSR1,CEP135,CLIP1,CNN2,CORO2A,CTNNA1,CYLD,DAG1,DES,DICER1,DSP,DYNC1H1,DYNC1LI1,DYNLL1,EMP2,EP300,EPB41L2,ERBIN,ESPN,EZR,FARP2,FAT1,FIGN,FLII,FLNA,FLNB,FMN2,FRYL,FSCN1,GAPDH,GOLGA2,HSP90B1,IL1A,KANK2,KIF20A,KIF23,KPNB1,KRT14,…			Category	ID	Title (or Source)	Cluster logP	Cluster GeneSet			GO: Biological Process	GO:0048878	chemical homeostasis	5.51253	AACS,ABCA1,ABCB6,ABCC2,ABCG1,ABCG2,ACAD8,ACOX1,ACOX2,ADCY3,ADCY4,ADCY6,ADCY7,ADCYAP1,ADCYAP1R1,ADIPOR2,ADM,ADNP,AKAP6,AKR1C1,ALOX12B,AMPD2,ANPEP,ANXA7,APOB,APOC4,AQP1,AQP11,ASGR2,ASPH,ATP2B1,ATP2B4,ATP2C2,ATP4B,ATP6V0A1,ATP6V1B1,ATP6V1H,ATP7A,ATP7B,AVPR1B,AVPR2,BAK1,BCL2,CACNA2D1,CACNB4,CALB1,CALCR,CALM1,CASQ1,CASQ2,CAV1,CCK,CCKBR,CCL7,CCR3,CCR4,CCR7,CD4,CD52,CD55,CDKN2A,CHRNA9,CLIC4,COMMD1,CP,CP…			Pathway	83064	TGF-beta signaling pathway	4.06989	ACVR1,ACVR2B,AMH,AMHR2,DCN,ID1,ID2,IFNG,LEFTY1,LTBP1,MAPK1,PPP2CB,SMAD4,SMURF1,TFDP1										GO: Biological Process
GO: Biological Process	GO:0030182	neuron differentiation	10	ABI2,ABT1,ACSL4,ACTB,ACTR3,ADCYAP1,AGTPBP1,AKAP5,ALCAM,ALK,ANKRD27,APOD,APP,ARFGEF1,ARHGAP4,ARHGEF1,ATF1,ATG7,ATL1,ATP8A2,AVIL,BAIAP2,BCL11B,BDNF,BLOC1S6,BMP2,BMP5,CAPZB,CASP3,CBLN1,CCK,CCKAR,CCL5,CD44,CDC20,CDH11,CDH2,CELSR2,CHN1,CHRNA3,CIT,CLIC5,CNGB1,CNR1,CNTN2,CSPG4,CTF1,CUL7,CUX1,CYFIP1,DBN1,DCC,DCDC2,DCLK1,DDIT4,DDX6,DGKG,DGUOK,DISC1,DKK1,DLL4,DLX5,DNMT3A,DPYSL2,DPYSL5,DSCAM,ECM2,EDNRB,EFNA…			GO: Biological Process	GO:2000145	regulation of cell motility	5.79393	ACTN4,ADGRA2,ADORA3,AGTR2,AKT2,ANXA3,AP1AR,ARSB,ATP8A1,BDKRB1,BMP10,BMP2,BMP4,BMP5,BMPR2,C1QBP,C3AR1,C5AR2,CALR,CAMK2D,CARMIL1,CCAR1,CCBE1,CCL20,CCL21,CCL25,CCL26,CCR1,CCR7,CCSAP,CEMIP,CGA,CITED2,CLDN7,CORO1A,CREB3,CX3CR1,CXCL1,CXCL11,CXCL13,CXCL8,CXCR2,CXCR4,DAPK2,DAPK3,DPYSL3,EGFL7,FES,FGA,FGF1,FGF18,FGFR1OP,FGR,FLRT2,FOXF1,FURIN,GAB2,GCNT2,GCSAML,GLIPR2,GREM1,HAS1,HBEGF,HYAL2,IGF1,IGFBP5,IL18,…			GO: Biological Process	GO:0072594	establishment of protein localization to organelle	10	ADAR,AP3B1,ATP5IF1,BBC3,BCL2L11,BCL3,BMF,BRCA2,CCT7,CCT8,CREB3,CYLD,DAB2,DAG1,DDX58,DYNLL1,EDAR,EP300,FLNA,HES1,HK2,HSP90AB1,HSPA8,HUWE1,IL6,IPO4,IPO5,IPO7,IPO8,KPNB1,LMNA,MFN2,MTX2,NAGPA,NEDD4,NUP205,NUP214,NUP54,NUP58,NUTF2,OPTN,PARL,PDE2A,PEX6,PHIP,PINK1,PRDX1,RPL13,RPL19,RPL23,RPL27,RPL27A,RPL3,RPL30,RPL31,RPL32,RPL37,RPL9,RPLP1,RPS12,RPS14,RPS19,RPS26,RPS6,RPS7,RUVBL1,SAMM50,SIRT1,SLC9A1,SNA…			GO: Biological Process	GO:0030162	regulation of proteolysis	10	ADAM8,ADAM9,ADRM1,AGT,AHSG,AIFM1,AKIRIN2,AKT1,ALOX12,AMBP,ANAPC15,ANAPC16,ANAPC2,ANAPC4,ANAPC5,ANGPTL8,ANKIB1,ANKS1A,APAF1,APC,APLP2,APOPT1,AQP1,ARL6IP5,ARRB1,ASPH,ATG7,ATP13A2,ATP5IF1,ATRAID,BAK1,BAX,BBC3,BBS7,BCAP31,BCL10,BCL2A1,BCL2L1,BCL2L10,BEX3,BIRC2,BIRC6,BOK,BTRC,BUB1,C1QBP,C4BPA,C4BPB,C6,C7,C8A,C8B,C8G,C9,CAPN3,CARD8,CASP1,CASP3,CASP7,CASP8,CAV3,CCDC22,CCK,CD27,CD55,CDC16,CDC27,CDK1,CDK5…			GO: Biological Process	GO:0006606	protein import into nucleus	5.46843	ABRA,ADAR,AKAP6,AKR1C3,APOD,CABP1,CEACAM1,CSE1L,CYLD,DAB2,DDX58,DYRK2,EGF,EP300,FLNA,GNAQ,GREM1,IGF1,IL12B,IL18,IL18R1,IL6,ING1,IPO7,IPO8,IPO9,JUP,KPNA1,KPNA3,MAPK1,MBTPS1,MDFI,MED1,NUP214,NUP50,NUP62CL,OPRD1,PBLD,PDIA3,PHIP,PIK3R1,PKIA,PPM1B,PPP3R1,PRICKLE1,PTPN5,PTTG1IP,RGS20,SFRP2,SFRP5,SMAD4,SNAI2,SNUPN,SPTBN1,SUFU,SULF2,TCF7L2,TEK,TGFBR1,TNPO1,VHL,WNT3A,XBP1,ZC3H12A,ZFYVE9										Cluster [-0.118:0.119]							GO: Biological Process
GO: Biological Process	GO:0051046	regulation of secretion	10	ACSL4,ADAM8,ADAM9,ADCYAP1,ADORA1,ADORA3,AIM2,ANGPT1,ANPEP,ANXA1,AP1G1,ARL2BP,ARNTL,ARRB1,ASIC1,ATG7,ATP6AP1,AVPR2,B4GALT1,BANK1,BCR,C1QTNF3,CACNA1E,CACNA1G,CACNA2D2,CADM1,CAMP,CCK,CCKAR,CCKBR,CCL5,CD2,CD34,CHRNA3,CHRNA4,CLTRN,CNR1,COMT,CPLX1,CPT1A,CRH,CX3CL1,CYBA,DNM1L,DPYSL2,EDN2,EDNRB,EGF,EPHA5,ERBB3,FBLN1,FCER1G,FCN1,FGF23,FGFR4,FKBP1B,FLT3,GHSR,GLUD1,GLUL,GOLPH3L,GPER1,GPR39,GSDMD,HADH,HNF4A,…			GO: Biological Process	GO:0023057	negative regulation of signaling	5.79267	ABCC8,ACKR3,ADGRA2,ADH7,AGAP2,AGTR2,AMER2,AMHR2,AP1AR,AP2M1,AR,ARF1,ARHGAP35,ARRB1,ATXN1,AVPR1A,BAMBI,BAX,BCL2L10,BDNF,BMP2,BMP4,BMP5,BTRC,C1QBP,C1QTNF3,CALCA,CALR,CAMK2B,CAV1,CD3E,CHRDL2,CHST11,CISH,CNIH2,CNKSR3,CREB3,CRHR2,CRTC3,CRY2,CRYBA1,CSF2,CSNK1E,CX3CR1,CXCL8,DDIT4,DDIT4L,DHRS3,DHX58,DKK1,DKK2,DNAJA1,DRD3,DUSP18,DUSP4,DUSP5,DYRK1A,EGFL7,ENY2,ERRFI1,EYA1,EZH2,FAM89B,FASLG,FBN2,FGA,FGB,FGFR…			GO: Biological Process	GO:0043603	cellular amide metabolic process	10	AARS,ADAR,AGO1,ARG2,ASNS,ATF4,ATP5IF1,BCL3,BTG2,CAD,CCL5,CERS2,CPA3,CPEB2,CPM,CPS1,CYP1B1,DAPK1,DDX25,DICER1,DNAJC3,EEF2,EIF2AK2,EIF3B,EIF3D,EIF3H,EIF3I,EIF4A1,EIF4E3,EIF4G1,EIF4G3,ELAVL1,EP300,ERAP1,F2,F9,FAM129A,FMR1,FXR1,GAPDH,GCH1,GCLM,GDAP1L1,HNRNPA2B1,IGF2BP3,IL6,IREB2,KARS,KRT17,LARS,LRRC47,LSM14A,METTL17,MKNK2,MRPL12,MRPL32,MRPL34,MRPL48,MRPL51,MRPS15,MTHFD1L,MTR,NCBP2,NCOR1,NCSTN,NFKB1,N…			GO: Biological Process	GO:0051338	regulation of transferase activity	10	ACD,ACE,ADAM8,ADAM9,ADAR,ADCY4,ADCY7,ADCY8,ADIPOQ,ADNP,ADORA1,ADORA2B,AGAP2,AGT,AGTR1,AHSG,AKAP6,AKT1,ALK,ALS2,ANAPC15,ANAPC16,ANAPC2,ANAPC4,ANAPC5,ANGPT4,APC,APLP2,ARRB1,ASPN,ATG14,ATP2B4,ATRAID,AXIN2,AZU1,BAK1,BAX,BCL10,BGN,BLM,BMI1,BMP4,BMP7,BRAF,BTRC,C1GALT1C1,C1QTNF2,CALCA,CALM1,CALM2,CARD10,CASP3,CAV3,CBLC,CBS,CCDC88A,CCL19,CCL21,CCL5,CCNB3,CCNC,CCND1,CCND2,CCNH,CCNL1,CCNL2,CCNT1,CCT2,CCT4,…			GO: Biological Process	GO:0060429	epithelium development	5.4104	ACER1,ACVR1,ADAM9,ADM,AFDN,AGR2,AKR1C1,AKR1C2,AKR1C3,AKT2,ALDH1A1,AMPD2,ANXA4,ANXA7,AP2B1,AQP11,ARID1A,ARL13B,ATP2C2,ATP6AP2,ATP7A,BAK1,BBS4,BCL2,BMPR2,BNC1,CALB1,CASP6,CASP8,CAV1,CDHR2,CDKN2A,CEACAM1,CELSR2,CLIC4,CLTC,COBL,CPLANE1,CPS1,CTHRC1,CTSZ,CXCR2,CXCR4,DAB2,DHRS9,DLL4,DLX6,DMRT2,DSP,EDNRB,EGF,ENAH,EP300,FGF1,FGF8,FGFR3,FLNA,FLT1,FOXF2,FRAS1,GCM1,GDF11,GFI1,GNA13,GNAQ,GPC6,GREM1,GRHL1,GRSF…			Cluster [-0.213:0.024]							Category	ID	Title (or Source)	Cluster logP	Cluster GeneSet			GO: Biological Process
GO: Biological Process	GO:0006629	lipid metabolic process	10	ABCA4,ABCB11,ABHD12,ABHD2,ABHD6,ACADVL,ACAT2,ACLY,ACOT2,ACOT7,ACP6,ACSL4,ADORA1,AGPAT3,AKR1C1,AKR1C2,ALDH3A2,ALDH8A1,ALG2,ALG8,ALG9,ALKBH7,ALOX15,AMACR,ANXA1,APLP2,APOB,APOBR,APOD,APP,ARSG,ASAH1,ASAH2,ATG7,ATP1A1,B4GALT6,BCL11B,BCO1,BDH2,BMP2,BMP5,BPNT1,BSCL2,C3,CAT,CCKBR,CCNC,CD28,CD86,CDK8,CDS2,CERK,CLN3,CNR1,COMT,COQ2,CPT1A,CPT1B,CPT1C,CREBL2,CREM,CRH,CRYL1,CTSA,CYB5A,CYB5R2,CYP27A1,CYP27B1,CY…			GO: Biological Process	GO:0060284	regulation of cell development	5.78028	ACTN4,ACTR3,ADCYAP1,ADGRA2,AKAP13,AKAP6,ALX1,ANKRD27,AP1AR,ARF1,ARHGAP35,ARSB,ASCL2,ATF5,ATG7,ATXN1,B4GALT1,BAD,BAMBI,BAX,BCL11A,BDNF,BMP10,BMP2,BMP4,BMP5,BMPR2,BRINP3,C1QBP,CALR,CAMK2B,CARMIL1,CAV1,CCDC88A,CDH4,CDH5,CDK5RAP2,CDKL3,CFL1,CHRNB2,CLDN18,CNTN2,CNTN4,CRMP1,CTDSP1,CX3CR1,CXCR4,DKK1,DPYSL2,DPYSL3,DRD3,ENC1,EOMES,EPHB3,ETV5,EYA1,EZH2,FAT3,FES,FGA,FGB,FGF13,FGFR3,FKBP4,FLRT2,FMOD,FOXA1,FZ…			GO: Biological Process	GO:0006413	translational initiation	10	ATF4,CCL5,DNAJC3,EIF2AK2,EIF3B,EIF3D,EIF3H,EIF3I,EIF4A1,EIF4E3,EIF4G1,EIF4G3,FMR1,NCBP2,PAIP2,PPP1CA,PTBP1,RPL13,RPL19,RPL23,RPL27,RPL27A,RPL3,RPL30,RPL31,RPL32,RPL37,RPL9,RPLP1,RPS12,RPS14,RPS19,RPS26,RPS6,RPS7,TPR,UHMK1			GO: Biological Process	GO:0044403	symbiont process	10	AAAS,ACE2,ACOT8,ACY3,ADAR,AMBP,ANPEP,APOA2,APOBEC3G,AQP1,ATG7,ATP6V0C,AXL,AZU1,BANF1,BAX,BCL2L1,BIN1,BTRC,BUB1,C19orf66,C1QBP,C9,CAMLG,CAMP,CARM1,CASP8,CBX5,CCL1,CCL3,CCL4,CCL5,CCNT1,CD28,CD55,CD81,CD86,CD93,CDC25C,CENPA,CENPU,CFL1,CFLAR,CHD1,CHMP2A,CHMP4A,CHMP7,CLDN1,CLEC4M,CLEC5A,COPS6,CR1,CREB1,CRTC2,CTBP1,CTBP2,CTDP1,CTSB,CUL1,CUL2,CUL7,CXCL6,DDB1,DDX11,DDX5,DDX6,DEK,DLG1,DYNC1I2,DYNC1LI1,DYN…			GO: Biological Process	GO:0001934	positive regulation of protein phosphorylation	5.38811	ABCA7,ACKR3,ACVR1,ADAM9,ADCY3,ADCY4,ADCY6,ADCY7,ADCYAP1,ADNP,ADORA2B,AKAP6,AKT2,ALOX12B,ARHGEF5,ATP2B4,AZU1,BAK1,BCAR3,BCL2,BIRC7,BMPR2,C3,CALM1,CAMP,CAV1,CCK,CCL17,CCL25,CCL7,CCR7,CD4,CD6,CD84,CDC25B,CDK2AP1,CDK9,CEACAM1,CLIP3,CLSPN,CSNK1D,CTF1,CXCR4,DAB2,DIRAS1,DSTYK,EDNRB,EFNA5,EGF,EIF2AK2,EIF4G3,ENPP2,EP300,ERP29,FAM129A,FAM20A,FBXW7,FGF1,FGF13,FGF18,FGF8,FGFR3,FGG,FLT1,GADD45G,GDF11,GDF15,GF…			Category	ID	Title (or Source)	Cluster logP	Cluster GeneSet			GO: Biological Process	GO:0098771	inorganic ion homeostasis	10	ABCB6,ABCB7,ABCC2,ABCG2,ADCYAP1R1,ADRA1A,ADRA1B,ADRA1D,AGTR2,AKAP5,AKAP6,ALAS2,ANK1,ANK3,ANPEP,ANXA7,APLP2,APOE,ARF1,ASPH,ATOX1,ATP12A,ATP13A1,ATP13A2,ATP13A4,ATP1B2,ATP2A1,ATP2A2,ATP2A3,ATP2B3,ATP2C1,ATP2C2,ATP4A,ATP4B,ATP5F1B,ATP6AP1,ATP6V0A1,ATP6V0A4,ATP6V0B,ATP6V0C,ATP6V0D1,ATP6V0E1,ATP6V1B2,ATP6V1C1,ATP6V1C2,ATP6V1E1,ATP6V1F,ATP6V1H,AVPR1B,AVPR2,BBC3,BCAP31,BDKRB1,BDKRB2,BMP4,C1QTNF1,C7,CA14…			GO: Biological Process
GO: Biological Process	GO:0007167	enzyme linked receptor protein signaling pathway	10	ACTB,ACTR3,ADAM10,ADAM9,ADORA1,AKAP7,ALK,ANGPT1,APH1A,APH1B,APLP2,APOD,APP,ARPC1B,ARPC2,ATP6AP1,ATP6V0A1,ATP6V0A2,ATP6V1B2,BAIAP2,BAIAP2L2,BCL9L,BCR,BDNF,BMP2,BMP3,BMP5,BMP8B,C2CD5,CASP3,CAV2,CBL,CCL2,CDH13,CDH5,CHN1,CHRNA3,CITED1,CITED2,COL3A1,COL4A1,COL4A2,CRIM1,CRK,CSPG4,CTF1,CYBA,CYFIP1,DDIT4,DDR2,DKK1,DLX5,DMRT1,DOK1,DOK2,DOK5,DUSP6,EFNA3,EFNA4,EFNB2,EGF,EPHA5,EPHA6,EPHB4,ERBB2,ERBB3,ERBB4,E…			GO: Biological Process	GO:0030334	regulation of cell migration	5.6049	ACTN4,ADGRA2,ADORA3,AGTR2,AKT2,ANXA3,ARSB,ATP8A1,BDKRB1,BMP10,BMP2,BMP4,BMP5,BMPR2,C1QBP,C3AR1,C5AR2,CALR,CAMK2D,CARMIL1,CCAR1,CCBE1,CCL20,CCL21,CCL25,CCL26,CCR1,CCR7,CEMIP,CGA,CITED2,CORO1A,CREB3,CX3CR1,CXCL1,CXCL11,CXCL13,CXCL8,CXCR2,CXCR4,DAPK2,DAPK3,DPYSL3,EGFL7,FGA,FGF1,FGF18,FGFR1OP,FGR,FLRT2,FOXF1,FURIN,GAB2,GCNT2,GCSAML,GLIPR2,GREM1,HAS1,HBEGF,HYAL2,IGF1,IGFBP5,IL18,IL1B,IL4,IL6ST,IRS1,IT…			GO: Biological Process	GO:0044764	multi-organism cellular process	10	ADAR,ANKRD17,APOBEC3F,APOBEC3G,BCL2L11,BRD4,CARM1,CAV1,CAV2,CBX5,CCL5,CCNT1,CREB3,CXCR4,DAG1,DDX58,DDX60,DICER1,DYNC1LI1,DYNLL1,EFNB2,EIF2AK2,EIF3B,EIF3D,EIF4A1,EIF4G1,EIF4G3,EP300,FMR1,GBF1,HIPK2,HLA-A,HLA-B,HMGA2,HSP90AB1,HSPA8,IFIT1,IFITM1,IFITM2,IFITM3,IPO5,IPO7,ISG15,ITGB6,KARS,KDR,KPNB1,KRT19,LEF1,LSM14A,MX1,NEDD4,NOTCH1,NUP205,NUP210,NUP214,NUP54,NUP58,PDCD6IP,PKN2,PLSCR1,POLR2A,PSMA7,PSMB…			GO: Biological Process	GO:0007417	central nervous system development	10	AARS,ABAT,ABCB6,ABR,ACAN,ACAT1,ACSL3,ACTB,ACVR1B,ADAM22,ADGRG1,AFF2,AGT,AGTPBP1,AK8,AKT1,ALDH1A2,ALDH1A3,ALDH3A2,ALDH5A1,ANXA3,APAF1,APLP1,APLP2,APOD,AQP1,ARCN1,ARSA,ARSB,ASCL1,ASPA,ASPM,ATG7,ATIC,ATN1,ATP2B1,ATP2B4,ATP5PB,ATP5PF,ATP6V0D1,AVPR1A,AVPR2,AXL,B3GNT5,BAG3,BAK1,BASP1,BAX,BBS7,BCAN,BCL11B,BIN1,BMP4,BMPR2,BOK,BPTF,BRCA2,BTBD3,BYSL,CALM1,CALM2,CASP3,CBS,CCDC14,CCKAR,CD27,CDH2,CDH22,CDK5RA…			GO: Biological Process	GO:0071396	cellular response to lipid	5.38539	AACS,ABCA1,ABCG2,ACVR1,ADAM9,ADAMTS1,ADCY3,ADCY6,ADCYAP1,ADNP2,AKR1C2,AKR1C3,APOB,AQP1,ARID1A,ATP2B1,AXL,BUD31,BYSL,CASP9,CD55,CD6,CD84,COL1A1,CPS1,CRHBP,CXCL16,DAB2,E2F1,EDNRB,EFNA5,EP300,ESRRG,FCGR3A,FHL2,FKBP4,GBP2,GFI1,GPER1,H2AFZ,HDAC5,HEYL,HNRNPD,HOXA1,IGF1,IL12B,IL18,IL24,IL6,INHBB,ISL1,KLF4,KLRK1,LMO3,LY96,MAPK1,MED1,MED12,MLC1,MTDH,NCOA2,NCOA4,NCOA6,NPC1,NR0B1,NR0B2,NR2C1,NR2F2,NR4A2,NTR…			GO: Biological Process	GO:0006753	nucleoside phosphate metabolic process	10	ABCA1,ACOT7,ACR,ADCY10,ADCY7,ADCY9,ADCYAP1,ADM,ADNP,ADORA2A,ADORA2B,ADSL,ADSS,AFMID,AK2,AK3,AK4,AK9,AKAP5,ALDOA,ALDOB,AMPD1,AMPD2,ATP1A2,ATP2B2,ATP5F1B,ATP5F1C,ATP5MC1,ATP5MF,ATP5MG,ATP5PB,ATP5PD,ATP5PF,ATP6V0A2,ATP6V0A4,BDNF,CALM1,CANT1,CAP2,CASK,CAT,CEP290,CHGA,CNGB3,COX10,COX4I1,COX5B,COX6B1,COX7A2L,COX7C,COX8A,CRH,CRHR1,CRHR2,CTPS1,CXCL10,CXCL11,CXCR3,CYB5R4,CYCS,DCAKD,DCK,DCTD,DCXR,DERA,DGUO…			GO: Biological Process	GO:0051272	positive regulation of cellular component movement	10	AAMP,ABCC1,ACP5,ACTN4,ACVR1,ACVR1B,ADAM10,ADAM17,ADORA3,AKT2,ALOX12,AMOT,AMOTL1,ANGPT4,ANXA3,ARHGAP5,ARHGEF7,ATOH8,BCAR1,BCAS3,BDKRB1,BMP2,BMP4,C1QBP,CAMK2D,CBLL1,CCBE1,CCL11,CCL19,CCL2,CCL20,CCL21,CCL24,CCL26,CCL3,CCL4,CCL5,CCL7,CCL8,CCR7,CD274,CDH13,CEMIP,CFAP20,CGA,CORO1A,CSF1,CXCL1,CXCL12,CXCL16,CXCL2,CXCL3,CXCL6,CXCL9,CXCR2,DAB2,DAB2IP,DAPK2,DAPK3,DDR2,DMTN,DRD1,DSCAM,EDN2,EDNRA,EGR1,ELANE,E…			GO: Biological Process
GO: Biological Process	GO:0007599	hemostasis	10	ACTB,AKAP10,AP3B1,ARRB1,ASIC2,AVPR2,BLOC1S6,C3,CAPZB,CBX5,CD34,CD9,COL3A1,CX3CL1,DGKB,DGKE,DGKG,DOCK6,ENTPD2,EVL,F10,F13B,F2RL2,F7,F8,F9,FAP,FBLN1,FCER1G,FIBP,FLNA,FYN,GNA12,GNB1,GP1BA,GP6,GPI,HBB,HNF4A,HPS1,HPSE,IL6,JAK2,LAT,LCK,LMAN1,LNPK,MFN2,MYH9,MYL9,P2RX2,P2RX3,P2RX6,PDGFA,PDGFRA,PDPN,PF4,PF4V1,PIK3R1,PLAT,PRCP,PRDX2,PRKACB,PRKCA,PRKCE,PRKCH,PROCR,PTPN11,PTPRJ,RAB5A,SERPINA10,SERPINB2,SERPI…			GO: Biological Process	GO:0032940	secretion by cell	5.56508	ABCC8,ACTN2,ACTN4,ADCYAP1,ADORA2A,ADORA3,AGTR2,ANXA3,APBA1,APLN,ARF1,ARL4D,ARRB1,ATG7,AVPR1A,B4GALT1,BAD,BDNF,BTK,C1QTNF3,C5AR2,CACNA1B,CAMP,CASR,CBLN4,CCR1,CCR7,CD244,CFD,CGA,CHI3L1,CHRNA4,CHRNB2,CLEC4E,CORO1A,CRHR2,CRY2,DNAJC5,DOC2A,DPYSL2,DRD3,ENSA,ENTPD1,ENY2,FCN1,FES,FGA,FGB,FGR,FOXF1,FURIN,G6PC2,GAB2,GAD1,GHRHR,GHSR,GIP,GLRA1,GLRX,GNPTAB,GRIN2B,GRM4,GRM7,HDAC1,HMGN3,HPS1,HSPA8,HSPD1,HTR6,HY…			GO: Biological Process	GO:0016032	viral process	10	ADAR,ANKRD17,APOBEC3F,APOBEC3G,BCL2L11,BRD4,CARM1,CAV1,CAV2,CBX5,CCL5,CCNT1,CREB3,CXCR4,DAG1,DDX58,DICER1,DYNC1LI1,DYNLL1,EFNB2,EIF2AK2,EIF3B,EIF3D,EIF4A1,EIF4G1,EIF4G3,EP300,FMR1,GBF1,HIPK2,HLA-A,HLA-B,HMGA2,HSP90AB1,HSPA8,IFIT1,IFITM1,IFITM2,IFITM3,IPO5,IPO7,ISG15,ITGB6,KARS,KDR,KPNB1,KRT19,LEF1,MX1,NEDD4,NOTCH1,NUP205,NUP210,NUP214,NUP54,NUP58,PDCD6IP,PKN2,PLSCR1,POLR2A,PSMA7,PSMB2,PSMB4,PSMB6…			GO: Biological Process	GO:0006875	cellular metal ion homeostasis	10	ABCB6,ABCB7,ACO1,ADCYAP1R1,ADRA1B,AGT,AGTR1,AKAP6,ALAS2,APLP2,ARF1,ASPH,ATOX1,ATP13A2,ATP1B2,ATP1B3,ATP2A1,ATP2B1,ATP2B3,ATP2B4,ATP2C1,ATP2C2,AVPR1A,AVPR1B,BAK1,BAX,BBC3,BCAP31,BDKRB1,BMP4,C7,CACNA1C,CACNA1F,CACNA1G,CACNA2D1,CACNB3,CALCA,CALCR,CALM1,CALM2,CALR,CAMK2D,CAPN3,CASR,CAV3,CCDC22,CCKAR,CCL1,CCL11,CCL13,CCL19,CCL21,CCL23,CCL28,CCL3,CCL5,CCL8,CCR10,CCR9,CD19,CD38,CD40,CD55,CHERP,CHRNA7,CI…			GO: Biological Process	GO:1901701	cellular response to oxygen-containing compound	5.38154	AACS,ABCA1,ABCG2,ADAM9,ADAMTS1,ADCY3,ADCY4,ADCY6,ADCY7,ADNP2,AKAP6,AKAP7,AKR1C1,AKR1C2,AKR1C3,AKT2,AOC1,APEX1,APOB,APOBEC1,AQP1,ATP2B1,ATP2B4,ATP6V0A1,ATP6V1B1,ATP6V1H,ATP7A,AXL,BAIAP2L1,BCL2L1,BTK,BYSL,CASP9,CAV1,CCL7,CD55,CD6,CD84,CDKN2A,CEACAM1,CLEC7A,COL1A1,COL3A1,CPEB2,CPS1,CRHBP,CXCL16,CYP11B1,CYP1B1,DNMT3A,E2F1,EDNRB,EFNA5,ENPP1,EP300,FBN1,FCGR3A,FOS,GBP2,GFI1,GLP1R,GNAQ,GNG12,GPAM,GPER1,G…			GO: Biological Process	GO:0018193	peptidyl-amino acid modification	10	ACVR1B,ADH5,ADIPOQ,ADNP,ADORA1,AFAP1L2,AGBL5,AGT,AGTPBP1,AHRR,AHSG,AKT1,AKT3,APLP2,APOA2,ARID4A,ARL2BP,ASH1L,ASH2L,ASPH,ASPHD2,ATF2,ATG7,ATR,AURKA,AXIN1,AXL,BAK1,BAX,BCAR3,BCL2,BCOR,BDKRB2,BDNF,BGN,BIRC5,BLK,BLM,BMI1,BMX,BRCA2,BRPF1,BRPF3,BRSK1,BRSK2,BTC,CAB39,CALM1,CAMK2D,CAMK4,CAPN3,CAV1,CAV2,CBX4,CBX8,CCNB1,CD44,CD81,CDC42,CDC7,CDCA8,CDK5,CDK5R1,CDKN2A,CETN2,CFAP20,CHEK2,CLCF1,CLK1,CLK2,CLK3,C…			GO: Biological Process	GO:0007417	central nervous system development	10	ABAT,ABCB6,ACAN,ACAT1,ACSL3,ACTB,ACTL6A,ACTL6B,ACVR1B,ADAM22,ADAM23,AFDN,AFF2,AGTPBP1,AGTR2,AK2,AK4,AK7,AK8,AKAP5,ALDH1A2,ANG,ANXA3,APAF1,APLP1,APLP2,APOD,ARF4,ARHGAP35,ARMC4,ARNT2,ARSA,ARSB,ARX,ASIC2,ASPA,ASPM,ATF5,ATG7,ATN1,ATP6V0D1,ATXN2,AVPR2,BAG3,BASP1,BCR,BIN1,BMP2,BMP4,BMPR1A,BOK,BRCA2,C16orf45,CACNA1A,CALM3,CASP2,CBS,CCDC14,CD27,CDC42,CDH1,CDH11,CDH22,CDK5,CDK5R1,CDK5RAP2,CDK5RAP3,CELSR1,…			GO: Biological Process
GO: Biological Process	GO:0000904	cell morphogenesis involved in differentiation	10	ACTB,ACTR3,ADAM15,AKAP5,AKIP1,ALCAM,ANKRD27,APP,ARHGAP4,ARHGEF1,ARPC2,ATG7,ATL1,ATP8A2,AXIN2,BAIAP2,BCL11B,BCL9L,BDNF,BMP2,BMP5,CASP3,CASP9,CCK,CCKAR,CDH11,CDH2,CELSR2,CHN1,CHRNA3,CIT,CITED1,CLIC4,CLIC5,CNTN2,CRYGB,CUL7,CUX1,CYFIP1,DBN1,DCC,DCDC2,DCLK1,DISC1,DKK1,DLX5,DPYSL2,DPYSL5,DSCAM,ECM2,EFNA3,EFNA4,EFNB2,EIF2B2,ENPP2,EOMES,EPHA5,ERBB2,ERG,ETV1,ETV4,EVL,EXT1,FBLN1,FBXO45,FEZ1,FEZ2,FGF13,FLNA…			GO: Biological Process	GO:0015696	ammonium transport	5.56507	ABCB1,ADCYAP1,ADORA2A,ADORA3,BTK,CHRNA4,CHRNB2,CRHR2,CSF2,DRD3,ENTPD1,HTR6,KCNA2,LGALS3,LILRB1,MAOB,NPY2R,OPRK1,PARK7,PRKCB,RHAG,RHCG,RTN4,SEC14L1,SLC18A1,SLC18A2,SLC22A1,SLC22A2,SLC38A2,SLC44A1,SLC5A7,SLC6A2,SNCA,VAMP3,YWHAZ			GO: Biological Process	GO:0032880	regulation of protein localization	10	ACVR1C,ADCYAP1,AIM2,ANO1,AP2M1,ARF6,ARFIP1,ARL2BP,ATP5IF1,BBC3,BCL2L11,BCL3,BIRC5,BMF,CACNA1C,CAV2,CCL5,CCT3,CCT7,CCT8,CD2AP,CD34,CLOCK,CLTRN,CREB3,CREBRF,CSK,CYLD,DAB2,DDX58,DYNLL1,EDAR,EDEM2,EP300,EZR,FLNA,FOXP1,GBF1,GBP1,GLUD1,HECTD1,HES1,HNRNPM,HSP90AB1,HSPA8,HTR2B,HUWE1,IL1A,IL6,IPO5,ITPR1,ITPR2,ITPR3,KCNQ1,KDM1A,LCP1,LDLRAP1,LMNA,LRP1,LZTS2,MARCKS,MSN,MYCBP2,NCL,NEO1,NUMB,NUP54,NUP58,NUTF2,…			GO: Biological Process	GO:0009126	purine nucleoside monophosphate metabolic process	10	ADK,ADSS,AK1,ALDOA,ALDOC,AMPD2,AMPD3,APRT,ATIC,ATP5F1A,ATP5F1B,ATP5F1C,ATP5F1D,ATP5IF1,ATP5MC1,ATP5MC2,ATP5MC3,ATP5MF,ATP5MG,ATP5PB,ATP5PD,ATP5PF,ATP6V0A1,ATP6V0A2,ATP6V1B1,BDNF,CASK,COQ7,COQ9,COX15,COX4I1,COX5A,COX5B,COX6B1,COX7B,COX7C,CYC1,CYCS,DLG1,DLG2,DLG4,DMAC2L,DNM1L,ECD,EIF6,ENO1,ENO2,ENO3,ENTPD1,ENTPD5,GADD45GIP1,GALE,GALK1,GALT,GAPDH,GAPDHS,GCK,GPD1,GPI,GUK1,HIF1A,HK2,HK3,HSPA8,HTR2A,IG…			Pathway	868086	Rap1 signaling pathway	4.20704	ADCY3,ADCY4,ADCY6,ADCY7,ADORA2B,AFDN,AKT2,CALM1,EFNA5,EGF,FGF1,FGF12,FGF13,FGF18,FGF22,FGF5,FGF8,FGFR3,FLT1,GNAI3,GNAQ,GRIN2B,IGF1,ITGAM,ITGB2,KIT,KITLG,KRAS,KRIT1,MAPK1,MET,NGFR,PARD6B,PDGFC,PGF,PIK3R1,PLCB1,PRKCG,PRKD1,RAC3,RAPGEF2,RASSF5,RGS14,SIPA1L3,TEK,VAV2,VEGFC			GO: Biological Process	GO:0022402	cell cycle process	10	ABRAXAS1,ACTR8,ACVR1B,AGO4,AKAP8L,AKT1,ALMS1,ANAPC16,ANK3,ANXA1,APBB2,APC,ARAP1,ARHGEF10,ARL3,ARL8A,ARPP19,ASPM,ATF2,ATF5,ATR,ATRIP,AURKA,B9D2,BABAM1,BACH1,BANF1,BARD1,BAX,BCL2,BCL2L1,BCL2L11,BID,BIN1,BIN3,BIRC5,BLM,BRCA2,BRD4,BRDT,BRSK1,BRSK2,BTC,BUB1B,C10orf99,CAB39,CABLES1,CALM1,CAMK2D,CAMK2G,CAPN3,CAV2,CCNB1,CCNB1IP1,CCNB2,CCNB3,CCND2,CCNG2,CCNY,CCP110,CCSAP,CDC20,CDC23,CDC26,CDC27,CDC42,CDC4…			GO: Biological Process	GO:0072507	divalent inorganic cation homeostasis	10	ADCYAP1R1,ADRA1A,ADRA1B,ADRA1D,AKAP5,AKAP6,ANK3,ANXA7,APOE,ASPH,ATP13A1,ATP13A2,ATP13A4,ATP2A1,ATP2A2,ATP2A3,ATP2B3,ATP2C1,ATP2C2,AVPR1B,BBC3,BCAP31,BDKRB1,BDKRB2,BMP4,C1QTNF1,CACNA1A,CACNA1C,CACNA1F,CACNA1I,CACNA2D1,CACNB3,CALCA,CALCR,CALM3,CAMK2D,CAPN3,CASQ1,CASQ2,CCKBR,CCL1,CCL11,CCL19,CCL2,CCL21,CCL23,CCL28,CCL3,CCL5,CCL7,CCL8,CCR10,CCR4,CCR7,CCR9,CD19,CD4,CD40,CD52,CD55,CEMIP,CHRNA10,CHRNA7,…			GO: Biological Process
GO: Biological Process	GO:0010975	regulation of neuron projection development	10	ACTR3,ADCYAP1,AKAP5,ANKRD27,ARHGAP4,ARHGEF1,ATF1,ATP8A2,AVIL,BAIAP2,BDNF,BMP5,CDC20,CDH2,CHN1,CHRNA3,CIT,CNR1,CNTN2,CSPG4,CUL7,CUX1,DBN1,DCC,DGUOK,DISC1,DPYSL2,DSCAM,EIF2B2,EPOR,FEZ1,FGF13,FIG4,FKBP1B,FMOD,FYN,GDI1,GPRC5B,GRIN1,GSK3B,HLA-A,HNRNPK,IL1RAP,IL1RAPL1,IL6,ITGA3,ITM2C,KANK1,KIAA0319,KIF3C,KLF4,KLK8,L1CAM,LGALS1,LIF,LPAR1,LRP1,LRP4,LRRC7,MAG,MAP1B,MAP2K2,MAPK6,MARCKS,MEF2C,MEGF8,MGLL,MT3…			GO: Biological Process	GO:0014896	muscle hypertrophy	5.50044	AGTR2,AKAP13,AKAP6,AR,BMP10,CAMK2D,ERRFI1,EZH2,GATA6,GLRX3,GSK3A,HEY2,IGF1,IGFBP5,IL6ST,KDM4A,LEP,MSTN,MYOC,NR4A3,PDE9A,PRKG1,RGS2,SLC25A4,SORBS2,TTN			GO: Biological Process	GO:0072359	circulatory system development	10	ADGRA2,AKAP13,ANGPTL3,ANKRD17,ARID1A,ARL13B,ATP5IF1,ATP7A,BASP1,BTG1,CACNA1C,CAD,CAV1,CCL24,CCL5,CCM2L,CD34,CHD7,COL4A1,COL5A1,CPLANE1,CRIP1,CSPG4,CXCR4,CYP1B1,DCN,DDIT3,DICER1,DSG2,DSP,DVL2,E2F7,EFNA1,EFNB2,EMP2,EP300,EPHB4,ERAP1,ERBB3,FAP,FBN1,FGF18,FLNA,FOXP4,GATA4,HAS2,HECTD1,HEG1,HES1,HIPK2,HNRNPU,HTR2B,IL1A,IL6,IRX4,JAK1,KCNQ1,KDR,KLF4,KLF5,LAMA5,LEF1,LGALS3,LMNA,LOX,LOXL2,LRP1,MAP3K3,MARCK…			GO: Biological Process	GO:0044770	cell cycle phase transition	10	ABCB1,ACTR1A,ACVR1,ACVR1B,AKAP8L,AKAP9,AKT1,ANAPC15,ANAPC16,ANAPC2,ANAPC4,ANAPC5,ANXA1,APC,ARPP19,ATP2B4,BAX,BCAT1,BLM,BRD7,BRSK2,BTRC,BUB1,C10orf99,CALM1,CALM2,CAMK2A,CAMK2D,CARM1,CCNB2,CCNB3,CCND1,CCND2,CCNH,CDC14A,CDC16,CDC25A,CDC25C,CDC27,CDC34,CDC5L,CDC6,CDC73,CDK1,CDK14,CDK3,CDK5RAP2,CDK5RAP3,CDKN1A,CDKN2C,CENPE,CENPF,CEP57,CEP63,CEP70,CHEK1,CHMP2A,CHMP7,CIT,CKAP5,CNOT1,CNOT3,CNOT4,CNOT7,CR…			Pathway	83105	Pathways in cancer	3.94112	ADCY3,ADCY4,ADCY6,ADCY7,AKT2,ARNT2,BCL2,BCL2L1,BID,BIRC7,CASP8,CASP9,CCNA1,CCNE2,CDKN2A,COL4A4,CREBBP,CXCR4,CYCS,E2F1,EDNRB,EGF,EP300,FADD,FGF1,FGF12,FGF13,FGF18,FGF22,FGF5,FGF8,FGFR3,FH,FOS,GNA13,GNAI3,GNAQ,GNB5,GNG12,HSP90B1,IGF1,IL6,ITGAV,JUP,KIT,KITLG,KLK3,KRAS,LAMA5,LAMB1,LPAR6,MAPK1,MET,MITF,NCOA4,PAX8,PGF,PIK3R1,PLCB1,PPARG,PRKCG,PTCH1,PTEN,PTGER1,RAC3,RASSF5,ROCK2,SMAD4,SUFU,TCF7L2,TGFBR1…			GO: Biological Process	GO:0006974	cellular response to DNA damage stimulus	10	AATF,ABRAXAS1,ACD,ACKR3,ACTR8,AEN,AKT1,ALKBH1,ALKBH7,AP5S1,APC,APEX2,ARMT1,ASCC2,ASH2L,ASTE1,ATAD5,ATF2,ATMIN,ATP23,ATR,ATRIP,ATXN3,AURKA,BABAM1,BACH1,BAK1,BARD1,BATF,BAX,BBC3,BCCIP,BCL2,BCL2A1,BCL2L1,BCL2L11,BCL2L2,BCLAF1,BID,BLM,BRAT1,BRCA2,BRD4,BRSK1,CASP3,CBX8,CCNB1,CCNO,CD44,CDC45,CDC5L,CDC7,CDCA5,CDIP1,CDK3,CDK9,CDKN2A,CDKN2D,CEBPG,CENPJ,CENPS-CORT,CEP63,CETN2,CHAF1B,CHCHD4,CHEK2,CIDEB,CNOT…			GO: Biological Process	GO:0006875	cellular metal ion homeostasis	10	ABCB6,ABCB7,ABCG2,ADCYAP1R1,ADRA1A,ADRA1B,ADRA1D,AGTR2,AKAP5,AKAP6,ALAS2,ANXA7,APLP2,APOE,ARF1,ASPH,ATOX1,ATP12A,ATP13A1,ATP13A2,ATP13A4,ATP1B2,ATP2A1,ATP2A2,ATP2A3,ATP2B3,ATP2C1,ATP2C2,ATP4A,AVPR1B,BBC3,BCAP31,BDKRB1,BDKRB2,BMP4,C1QTNF1,C7,CACNA1A,CACNA1C,CACNA1F,CACNA1I,CACNA2D1,CACNB3,CALCA,CALCR,CALM3,CAMK2D,CAPN3,CASQ1,CASQ2,CCKBR,CCL1,CCL11,CCL19,CCL2,CCL21,CCL23,CCL28,CCL3,CCL5,CCL7,CCL8,C…			GO: Biological Process
GO: Biological Process	GO:0048667	cell morphogenesis involved in neuron differentiation	10	ACTB,ACTR3,AKAP5,ALCAM,ANKRD27,APP,ARHGAP4,ARHGEF1,ATG7,ATL1,ATP8A2,BAIAP2,BCL11B,BDNF,CCK,CCKAR,CDH11,CDH2,CELSR2,CHN1,CHRNA3,CIT,CLIC5,CNTN2,CUL7,CUX1,CYFIP1,DBN1,DCC,DCDC2,DCLK1,DISC1,DLX5,DPYSL2,DPYSL5,DSCAM,ECM2,EFNA3,EFNA4,EFNB2,EIF2B2,EPHA5,ERBB2,ETV1,ETV4,EVL,EXT1,FBXO45,FEZ1,FEZ2,FGF13,FLRT3,FMOD,FYN,FZD3,GDI1,GFRA3,GLI2,GPC1,GRIN1,GSK3B,HDAC6,HOXA1,IL1RAPL1,ISL2,KIF26A,KIF26B,KIF5A,KRAS…			GO: Biological Process	GO:0006518	peptide metabolic process	5.4947	AGO1,AGO4,AIMP1,AKT2,ATF4,BACE1,BCL3,BOLL,C1QBP,CALR,CARNMT1,CARNS1,CGA,CHCHD1,CLIC3,CNOT7,CPEB2,CSNK1E,CTSZ,DAP3,DAPK3,DARS,DDX3Y,ECE2,EEF1B2,EEF1D,EEF2,EIF1,EIF2AK1,EIF2B3,EIF2S2,EIF3B,EIF3D,EIF3E,EIF3H,EIF3M,EIF5A2,ENC1,ERO1B,FAM129A,FURIN,GAPDH,GATC,GGT5,GLRX2,GSTA1,GSTT1,GTPBP1,HNRNPA2B1,HNRNPD,HNRNPL,IDH1,IGF1,IGF2BP1,IGF2BP2,IGFBP5,ILF3,KARS,KLK3,KRT17,LARP6,LSM14B,LVRN,MALSU1,MGST1,MIF4GD…			GO: Biological Process	GO:0044419	interspecies interaction between organisms	10	ADAR,ANKRD17,APOBEC3F,APOBEC3G,BCL2L11,BRD4,CARM1,CAV1,CAV2,CBX5,CCL5,CCNT1,CREB3,CXCL2,CXCR4,DAG1,DDX58,DICER1,DYNC1LI1,DYNLL1,EFNB2,EIF2AK2,EIF3B,EIF3D,EIF4A1,EIF4G1,EIF4G3,EP300,FMR1,GBF1,GBP2,HIPK2,HLA-A,HLA-B,HMGA2,HSP90AB1,HSPA8,IFIT1,IFITM1,IFITM2,IFITM3,IPO5,IPO7,IRF8,ISG15,ITGB6,KARS,KDR,KPNB1,KRT19,LEF1,MX1,NEDD4,NOTCH1,NUP205,NUP210,NUP214,NUP54,NUP58,PDCD6IP,PKN2,PLSCR1,POLR2A,PSMA7,P…			GO: Biological Process	GO:0051235	maintenance of location	10	ABCA1,ABCG1,ACACB,AKAP6,AKT1,APOB,APOC4,ARL2,ARL2BP,ASPH,ASPM,ATP2A1,B4GALNT1,BAX,BBC3,BCL3,BDKRB1,BSCL2,CACNA1C,CALM1,CALM2,CALR,CAMK2D,CAPN3,CCDC22,CCL19,CCL21,CCL3,CD19,CD27,CER1,CHERP,CIZ1,CORO1A,CRY1,CRY2,CXCL10,CXCL11,CXCL9,CXCR3,CYBA,DBI,DMD,DRD1,DRD2,ENPP1,F2,F2RL3,FAF1,FBN1,FCRL5,FKBP1B,FLNA,FLNB,FTO,GAA,GET4,GPAA1,GPR39,GPSM2,GRIK5,GSTM2,GSTO1,HAP1,HEXA,HILPDA,HK2,HRC,HSP90B1,HTR2A,HTR2…										GO: Biological Process	GO:0051336	regulation of hydrolase activity	10	A2M,ABCA7,ABHD5,ABR,ACAP2,ACTN2,ADAP2,ADCYAP1,ADORA2A,ADRM1,AFDN,AGAP1,AGAP2,AGFG1,AGFG2,AGT,AHSA2P,AHSG,AIM2,AKIRIN2,AKT1,ALDOB,AMBP,AMOT,AMPH,ANGPTL3,ANGPTL4,ANXA1,APAF1,APCS,APLP2,APOA2,APOC2,APOH,ARAP1,ARF4,ARFGAP1,ARFGAP3,ARFGEF2,ARFGEF3,ARHGAP1,ARHGAP12,ARHGAP19,ARHGAP22,ARHGAP28,ARHGAP30,ARHGAP32,ARHGAP45,ARHGAP6,ARHGAP9,ARHGDIG,ARHGEF1,ARHGEF10,ARHGEF10L,ARHGEF16,ARHGEF18,ARHGEF19,ARHGEF3…			GO: Biological Process	GO:0051130	positive regulation of cellular component organization	10	ABCA7,ACD,ACHE,ACSL3,ACSL6,ACSM6,ACTL6A,ACTN2,ACTN4,ACTR2,ADAMTS1,ADD1,ADGRB1,ADGRB2,ADGRL1,ADGRL2,AGR2,AHSG,AKAP5,AKAP8,AKAP8L,AKT2,ALOX15,AMOT,ANAPC2,ANK1,ANK3,ANKRD27,ANXA13,APBB1,APOC2,APOE,APOPT1,AR,ARF1,ARF6,ARHGAP35,ARHGEF10,ARHGEF15,ARHGEF5,ARHGEF7,ARIH2,ARL2,ARPC1A,ARPC4,ARPC5L,ARSB,ASIC2,ATAD1,ATP5IF1,AURKB,AXIN2,BAIAP2,BAIAP2L1,BBC3,BCAS3,BCL11A,BCR,BICD1,BIN1,BIRC5,BMP2,BMP4,BMP5,BMP7…			GO: Biological Process
GO: Biological Process	GO:0048812	neuron projection morphogenesis	10	ACTB,ACTR3,AKAP5,ALCAM,ANKRD27,APP,ARHGAP4,ARHGEF1,ATG7,ATL1,ATP8A2,BAIAP2,BCL11B,BDNF,CCK,CCKAR,CDH11,CDH2,CELSR2,CHN1,CHRNA3,CIT,CNTN2,CUL7,CUX1,CYFIP1,DBN1,DCC,DCDC2,DCLK1,DISC1,DLX5,DPYSL2,DPYSL5,DSCAM,ECM2,EFNA3,EFNA4,EFNB2,EIF2B2,EPHA5,ERBB2,ETV1,ETV4,EVL,EXT1,FBXO45,FEZ1,FEZ2,FGF13,FLRT1,FLRT3,FMOD,FYN,FZD3,GDI1,GFRA3,GLI2,GPC1,GRIN1,GSK3B,HDAC6,HNRNPK,HOXA1,IL1RAPL1,IMPACT,ISL2,ITGA1,KIF2…			GO: Biological Process	GO:0051270	regulation of cellular component movement	5.48826	ACTN4,ADGRA2,ADORA3,AGTR2,AKAP6,AKT2,ANXA3,AP1AR,ARSB,ATP8A1,B4GALT1,BDKRB1,BMP10,BMP2,BMP4,BMP5,BMPR2,C1QBP,C3AR1,C5AR2,CALR,CAMK2D,CARMIL1,CAV1,CCAR1,CCBE1,CCL20,CCL21,CCL25,CCL26,CCR1,CCR7,CCSAP,CEMIP,CGA,CITED2,CLDN7,CNIH2,CORO1A,CREB3,CX3CR1,CXCL1,CXCL11,CXCL13,CXCL8,CXCR2,CXCR4,DAPK2,DAPK3,DPYSL3,EGFL7,FES,FGA,FGF1,FGF18,FGFR1OP,FGR,FLRT2,FOXF1,FURIN,GAB2,GCNT2,GCSAML,GLIPR2,GREM1,HAS1,HBEG…			GO: Biological Process	GO:0070848	response to growth factor	10	ACVR1C,ADAM17,ADAMTS7,ADGRA2,ALPP,CAD,CAV1,CAV2,CCL5,CDKN1C,CHRDL1,CHRDL2,CPS1,DAB2,DCN,DOK5,DSTYK,EEF2,EHD1,EHD4,EP300,FBN1,FBN2,FGF18,FGF23,FOS,FSTL1,FSTL3,GATA4,GLG1,GRB10,HAS2,HES1,HIPK2,HNRNPM,HTRA1,IL6,KDM5B,KDR,KLF4,LEF1,LHX1,LIMS1,MCM7,MTMR4,MYOCD,MYOF,NCBP2,NEDD4,NEO1,NFKB1,NGFR,NOTCH1,NOTCH2,ONECUT2,PDE2A,PDE3A,PDGFRB,PDPK1,POLR2A,PRKCB,PRKCZ,PRKD1,PTBP1,PTPRK,RASA1,RBFOX2,RNF111,SHC1,S…			GO: Biological Process	GO:0051130	positive regulation of cellular component organization	10	ABCA7,ABCB4,ABR,ACD,ACE2,ACSL3,ACSL6,ACSM6,ACTR2,ACTR3,ADAM9,ADD1,ADGRB3,ADGRE5,ADGRL1,ADGRL3,ADNP,AGT,AHSG,AKAP8L,AKT1,ALOX15,AMOT,ANAPC2,ANK1,ANKFY1,ANXA1,AP1AR,APBB1,APC,APOC2,APOPT1,AQP1,AR,ARAP1,ARF1,ARF6,ARFIP2,ARHGEF10,ARL2,ARPC5,ARPC5L,ARRB1,ARSB,ATAD1,ATP5IF1,ATP8A1,ATR,AVIL,AXIN2,AXL,AZU1,BAG4,BAIAP2L1,BAIAP2L2,BAK1,BAP1,BAX,BBC3,BCL11A,BCL9L,BDNF,BIN1,BMP4,BMP7,BMPR2,BRAF,BRD7,BRK1,C1Q…			Cluster [-0.105:0.072]							GO: Biological Process	GO:0000278	mitotic cell cycle	10	AATF,ACTR8,ACVR1B,AFAP1L2,AKAP8L,AKT1,ALMS1,ANAPC16,ANK3,ANXA1,APC,ARHGEF10,ARL8A,ARPP19,ASNS,ASPM,ATF2,AURKA,AZI2,BABAM1,BACH1,BANF1,BAX,BCL2,BCL2L1,BID,BIN3,BIRC5,BLM,BRCA2,BRD4,BRSK1,BRSK2,BTC,BUB1B,CABLES1,CALM1,CAMK2D,CAMK2G,CAV2,CCNB1,CCNB2,CCNB3,CCND2,CCNG2,CCNY,CCP110,CCSAP,CDC20,CDC23,CDC26,CDC27,CDC42,CDC45,CDC5L,CDC6,CDC7,CDC73,CDCA5,CDCA8,CDH13,CDK10,CDK13,CDK3,CDK9,CDKN1C,CDKN2A,CDKN…			GO: Biological Process	GO:0050801	ion homeostasis	10	ABCA1,ABCB6,ABCB7,ABCC2,ABCG1,ABCG2,ADCYAP1R1,ADRA1A,ADRA1B,ADRA1D,AGTR2,AKAP5,AKAP6,ALAS2,ALOX12,AMELX,ANK1,ANK3,ANPEP,ANXA7,APLP2,APOE,ARF1,ASPH,ATOX1,ATP12A,ATP13A1,ATP13A2,ATP13A4,ATP1B2,ATP2A1,ATP2A2,ATP2A3,ATP2B3,ATP2C1,ATP2C2,ATP4A,ATP4B,ATP5F1B,ATP6AP1,ATP6V0A1,ATP6V0A4,ATP6V0B,ATP6V0C,ATP6V0D1,ATP6V0E1,ATP6V1B2,ATP6V1C1,ATP6V1C2,ATP6V1E1,ATP6V1F,ATP6V1H,AVPR1B,AVPR2,BBC3,BCAP31,BDKRB1,BD…			GO: Biological Process
GO: Biological Process	GO:0009725	response to hormone	10	ABCG2,ABHD2,ACTN2,ADAM9,ADCY7,ADCYAP1,ADRA1B,AKR1C1,AKR1C2,ANXA1,APOB,APRT,ARID1A,ARNT2,ARNTL,ASNS,ATP1A1,ATP6AP1,ATP6V0A1,ATP6V0A2,ATP6V1B2,AVPR2,BAIAP2,BAIAP2L2,BDNF,C2CD5,C3,CA9,CACYBP,CAD,CALM2,CASP3,CASP9,CAT,CATSPER3,CAV2,CCKAR,CCL2,CCL5,CCND1,CDC5L,CDK2,CGA,CITED1,CITED2,CNOT1,CRH,CTSB,CTSL,CTSS,CTSV,CYP27B1,CYP7B1,DDIT4,DDX5,DNAAF4,DNMT3A,DSG2,EIF2B2,EIF6,EPHA5,ESR1,ETS1,F7,FGF23,FLT3,FYN…			GO: Biological Process	GO:0016071	mRNA metabolic process	5.48563	AGO1,AGO4,BCAS2,C1QBP,CCAR1,CEBPG,CELF5,CNOT7,CRNKL1,CSTF2,CSTF3,CTNNBL1,DCP1A,DDX20,DDX41,DYRK1A,EDC3,EIF3E,ERI1,ERN1,ESRP1,ESRP2,FRG1,FUS,GTF2F1,GTPBP1,HELB,HNRNPA2B1,HNRNPC,HNRNPD,HNRNPH3,HNRNPL,HNRNPM,HNRNPU,HSPA8,ISY1,IWS1,JMJD6,KHDRBS3,LGALS3,LSM1,LSM3,LSM5,LSM6,MNAT1,MRTO4,NCBP3,NONO,PAN2,PATL1,PDE12,PNN,POLR2F,POLR2K,PPIH,PPIL3,PPP2CA,PRPF39,PTBP1,RBM17,RBM27,RBM39,RBMX,RNF20,RNF40,RPL10,…			GO: Biological Process	GO:0051253	negative regulation of RNA metabolic process	10	AIM2,APOBEC3F,APOBEC3G,ARID1A,ATAD2B,ATF3,BASP1,BAZ2A,BCL3,BHLHE40,BIRC5,BTG2,CAV1,CBFA2T2,CBX5,CCL5,CCNT1,CDKN1C,CHD8,CLOCK,CREBRF,CRY1,CXXC5,CYLD,CYP1B1,DAB2,DDIT3,DICER1,DNMT3B,DYRK1A,E2F7,EFNA1,EHMT1,ELF3,ENO1,EP300,ERBIN,EZR,FLNA,FOXF2,FOXN3,FOXP1,FOXP4,FZD6,HDGF,HES1,HIC2,HIPK2,HMGA2,HMGB2,HNRNPA2B1,HSPA8,IFITM3,IKZF4,IRAK1,IRF8,JARID2,JAZF1,JDP2,KANK2,KDM1A,KDM5B,KLF4,KLF5,LEF1,LHX1,LIMS1,…			GO: Biological Process	GO:0051208	sequestering of calcium ion	10	AKAP6,ASPH,BAX,BBC3,BDKRB1,CACNA1C,CALM1,CALM2,CALR,CAMK2D,CAPN3,CCL19,CCL21,CCL3,CD19,CHERP,CORO1A,CXCL10,CXCL11,CXCL9,CXCR3,CYBA,DBI,DMD,DRD1,DRD2,F2,F2RL3,FCRL5,FKBP1B,GPR39,GSTM2,GSTO1,HAP1,HRC,HSP90B1,HTR2A,HTR2C,IL13,ITGAV,ITGB3,ITPR1,ITPR2,LHCGR,LYN,MCOLN1,MS4A2,MYO5A,NGF,NOS1,NTSR1,PDE4D,PKD2,PLCG1,PLCG2,PRKACA,PRKCE,PTK2B,PTPN6,RYR1,SLC25A23,SLC8A1,TEX101,TGFB1,TGFB2,THY1,TPCN1,TPCN2,TRP…			Category	ID	Title (or Source)	Cluster logP	Cluster GeneSet			GO: Biological Process	GO:0006163	purine nucleotide metabolic process	10	ABCA1,ACOT7,ACR,ADCY10,ADCY7,ADCY9,ADCYAP1,ADM,ADNP,ADORA2A,ADORA2B,ADSL,ADSS,AK2,AK3,AK4,AK9,AKAP5,ALDOA,ALDOB,AMPD1,AMPD2,ATP1A2,ATP2B2,ATP5F1B,ATP5F1C,ATP5MC1,ATP5MF,ATP5MG,ATP5PB,ATP5PD,ATP5PF,ATP6V0A2,ATP6V0A4,BDNF,CALM1,CAP2,CASK,CAT,CEP290,CHGA,COX10,COX4I1,COX5B,COX6B1,COX7A2L,COX7C,COX8A,CRH,CRHR1,CRHR2,CXCL10,CXCL11,CXCR3,CYCS,DCAKD,DGUOK,DLD,DLG1,DLG2,DLG3,DLG4,DMAC2L,DNAJC15,DNM1L,DRD…			GO: Biological Process	GO:0034762	regulation of transmembrane transport	10	ACSL6,ACTN2,ACTN4,AHNAK,AKAP6,AKT2,ANK3,ANO1,APOA2,ARF1,ASIC2,ASPH,ATP1B2,ATP2C2,AZIN2,BDKRB1,BMP4,BPIFA1,CACNA1A,CACNA1C,CACNA1F,CACNA1H,CACNA1I,CACNA1S,CACNA2D1,CACNB1,CACNB2,CACNB3,CACNG7,CALM3,CAMK2D,CAPN3,CASK,CASQ1,CASQ2,CATSPER3,CBARP,CCL2,CCL3,CD19,CEMIP,CFTR,CHP1,CHRNA4,CLCN1,CLCN3,CLCN4,CLCN6,CLCN7,CLCNKA,CLCNKB,CLEC4C,CLIC2,CLIC6,CNIH2,COMMD1,CORO1A,CRHR1,CRHR2,CXCL12,CXCL9,CXCR3,CYBA,…			Pathway
GO: Biological Process	GO:0016477	cell migration	10	ABHD2,ABHD6,ABI2,ADAM10,ADAM15,ADAM8,ADAM9,ADGRL3,ADORA1,ADORA3,ANGPT1,ANXA1,APOB,APOD,ARAP3,ARHGAP4,ARHGAP5,ARHGDIB,ARHGEF16,ARPC2,ASTN1,AVL9,B4GALT1,BAG4,BCR,BMP2,BMP5,BTG1,C5orf30,CALCA,CAPN7,CCK,CCKAR,CCL18,CCL2,CCL23,CCL5,CD2,CD2AP,CD34,CD44,CD47,CDH13,CDH2,CELSR2,CEMIP,CGA,CHST4,CITED2,CKLF,CLIC4,CLN3,CNR2,CNTN2,COL3A1,COL5A1,CORO1A,CORO1B,CSPG4,CX3CL1,CXCL10,CXCL11,CXCL13,CXCL8,CXCL9,CXCR2…			GO: Biological Process	GO:0043069	negative regulation of programmed cell death	5.45204	ACKR3,ADCYAP1,ADORA2A,AGAP2,AGO4,AGTR2,AKT2,AMBRA1,AR,ARF4,ARL6IP1,ARRB1,ATF5,ATG7,AVEN,BAD,BAX,BCL2A1,BCL2L10,BCL3,BDNF,BEX3,BIRC2,BIRC3,BLM,BMP4,BMP5,BNIP3L,CAV1,CCL21,CCNG1,CCR7,CFL1,CHL1,CHST11,CITED2,CLDN7,CLN3,CLN8,CORO1A,CREB3,CSF2,CX3CR1,CXCR2,DHCR24,DHRS2,DNAJA1,DNAJC5,DOCK8,EYA1,FASLG,FGA,FGB,FGF21,FHL2,FKBP8,FMN2,FZD3,GATA6,GCM2,GLI3,GLRX,GREM1,GRINA,HDAC1,HEY2,HIGD1A,HIPK3,HK3,HPN,HSP…			GO: Biological Process	GO:0030968	endoplasmic reticulum unfolded protein response	10	AARS,ACADVL,ASNS,ATF3,ATF4,ATF6,BBC3,BCL2L11,CREB3,CREB3L2,CREBRF,DDIT3,DNAJB9,DNAJC3,EDEM2,EIF2AK2,EP300,HDGF,HERPUD1,HSP90B1,HYOU1,IGFBP1,LMNA,PARP16,PDIA5,SEC31A,SHC1,TLN1,XBP1			GO: Biological Process	GO:0070509	calcium ion import	10	ACE,AKAP6,ASPH,ATP2A1,ATP2B4,ATP2C2,BAX,BBC3,BDKRB1,CACNA1B,CACNA1C,CACNA1E,CACNA1G,CACNA1H,CACNB2,CALM1,CALM2,CAMK2D,CAPN3,CASK,CASR,CAV3,CCL19,CCL21,CCL3,CD19,CHERP,CORO1A,CRH,CRHR2,CXCL10,CXCL11,CXCL9,CXCR3,CYBA,DBI,DMD,DRD1,DRD2,EGF,F2,F2RL3,FCRL5,FKBP1B,GCK,GPR39,GRM6,GSTM2,GSTO1,HAP1,HES1,HRC,HTR2A,HTR2C,IL13,ITGAV,ITGB3,ITPR1,ITPR2,LHCGR,LYN,MCOLN1,MCU,MCUB,MICU1,MS4A2,MYO5A,NGF,NOS1,NTSR1…			GO: Biological Process	GO:0009205	purine ribonucleoside triphosphate metabolic process	10	AK1,AK5,ALDOC,ATP1A2,ATP1B1,ATP5F1A,ATP5F1C,ATP5F1D,ATP5MC1,ATP5MC2,ATP5MF,ATP5MG,ATP5PB,ATP5PD,ATP5PF,ATP5PO,ATP6V0A2,ATP6V0A4,ATP6V1A,ATP6V1B2,BPGM,COX15,COX4I1,COX5A,COX5B,COX6B1,COX7A2L,COX7C,COX8A,CTNS,CYC1,DNAJC15,EIF6,ENO1,ENO3,ENTPD5,FBP1,FXN,GADD45GIP1,GALE,GALT,GCK,GPHN,GPI,HIF1A,HK1,HK2,HSPA8,INSR,KHK,LDHA,MIF,MLXIPL,MOCS1,MOCS2,MPI,MYH3,MYH7,MYH8,MYOG,NCOR1,NDUFA11,NDUFA12,NDUFA13,NDU…			GO: Biological Process	GO:0051345	positive regulation of hydrolase activity	10	A2M,ABCA7,ABHD5,ABR,ACAP2,ACTN2,ADAP2,ADCYAP1,ADRM1,AFDN,AGAP1,AGAP2,AGFG1,AGFG2,AGT,AHSA2P,AIM2,AKIRIN2,AKT1,ALDOB,AMPH,APAF1,APOC2,APOH,ARAP1,ARF4,ARFGAP1,ARFGAP3,ARFGEF2,ARFGEF3,ARHGAP1,ARHGAP12,ARHGAP19,ARHGAP22,ARHGAP28,ARHGAP30,ARHGAP32,ARHGAP45,ARHGAP6,ARHGAP9,ARHGDIG,ARHGEF1,ARHGEF10,ARHGEF10L,ARHGEF16,ARHGEF18,ARHGEF19,ARHGEF39,ARHGEF5,ARL6IP5,ASAP2,ASAP3,ASPH,ATP1B2,AXIN1,BAK1,BAX,BBC3,…			GO: Biological Process	GO:0010959	regulation of metal ion transport	10	ACTN2,ACTN4,ADCYAP1R1,AHNAK,AKAP5,AKAP6,AKT2,AKT3,ANK3,AQP2,ARF1,ASPH,ATF4,ATP1B2,ATP2C2,BDKRB1,BEST1,BMP4,BPIFA1,CACNA1C,CACNA2D1,CACNB1,CACNB2,CACNB3,CALCA,CALM3,CAMK2A,CAMK2B,CAMK2D,CAMK2G,CAPN3,CASK,CASQ1,CASQ2,CBARP,CCL2,CCL3,CCL4,CCL5,CD19,CD4,CD84,CEMIP,CHP1,CLDN16,CLEC4C,CLIC2,CNTN1,COMMD1,CORO1A,CRHR1,CRHR2,CXCL12,CXCL2,CXCL9,CXCR3,CYBA,DHRS7C,DLG1,DMD,DMPK,DPP6,DRD1,DRD3,DRD4,EDNRA,EGF,…			Pathway
GO: Biological Process	GO:0046834	lipid phosphorylation	10	BPNT1,CD28,CD86,CERK,EFR3A,EGF,ERBB2,ERBB3,ERBB4,FGF1,FGF19,FGF23,FGF3,FGFR4,FYN,GAB1,IMPAD1,INPP1,IRS1,KL,LCK,NRG1,NRG2,PDGFA,PDGFRA,PI4K2B,PIK3C2A,PIK3C2B,PIK3R1,PIP4K2A,PIP4K2B,PIP5K1B,PTPN11,SPHK1,TTC7B,VAV1			GO: Biological Process	GO:0043604	amide biosynthetic process	5.39972	AANAT,AGO1,AGO4,AIMP1,AKT2,ASS1,ATF4,ATP5IF1,BCL3,BOLL,C1QBP,C20orf173,CALR,CARNS1,CHCHD1,CLN8,CNOT7,CPEB2,DAP3,DAPK3,DARS,DDX3Y,EEF1B2,EEF1D,EEF2,EIF1,EIF2AK1,EIF2B3,EIF2S2,EIF3B,EIF3D,EIF3E,EIF3H,EIF3M,EIF5A2,ENC1,FAM129A,FURIN,GAPDH,GART,GATC,GGT5,GTPBP1,HNRNPA2B1,HNRNPD,HNRNPL,IGF1,IGF2BP1,IGF2BP2,IGFBP5,ILF3,KARS,KLK3,KRT17,LARP6,LSM14B,MALSU1,MIF4GD,MKNK2,MMP7,MRPL1,MRPL13,MRPL15,MRPL35,MRP…			GO: Biological Process	GO:0001944	vasculature development	10	ADGRA2,ANGPTL3,ANKRD17,ARID1A,ATP5IF1,ATP7A,BTG1,CAV1,CCL24,CCL5,CD34,CHD7,COL4A1,COL5A1,CPLANE1,CSPG4,CXCR4,CYP1B1,DCN,DDIT3,DICER1,E2F7,EFNA1,EFNB2,EMP2,EPHB4,ERAP1,FAP,FGF18,FLNA,GATA4,HAS2,HECTD1,HEG1,HES1,HIPK2,IL1A,IL6,JAK1,KDR,KLF4,KLF5,LAMA5,LEF1,LGALS3,LOX,LOXL2,LRP1,MAP3K3,MEIS1,MRTFB,MYH9,MYO1E,MYOCD,NCL,NDNF,NEDD4,NGFR,NOTCH1,NOTCH2,PDE2A,PDE3B,PDGFRB,PRKCB,PRKD1,PTPN14,RASA1,RECK,RNF…			GO: Biological Process	GO:0010959	regulation of metal ion transport	10	ACE,ADCYAP1R1,ADORA1,AGT,AHCYL1,AKAP6,AKAP7,AKAP9,AKT1,AKT3,AQP2,ARF1,ASPH,ATP1B2,ATP1B3,ATP2B4,ATP2C2,BAK1,BAX,BDKRB1,BEST1,BMP4,CACNA1B,CACNA1C,CACNA1G,CACNA2D1,CACNA2D4,CACNB1,CACNB2,CACNB3,CALCA,CALM1,CALM2,CAMK2A,CAMK2D,CAPN3,CASK,CASR,CAV3,CCKAR,CCL3,CCL4,CCL5,CD19,CD84,CLDN16,CORO1A,CRH,CRHR1,CRHR2,CXCL10,CXCL11,CXCL9,CXCR3,CYBA,DBI,DLG1,DMD,DMPK,DPP6,DRD1,DRD2,DRD4,EDN3,EGF,EPO,F2,F2RL3,F…			GO: Biological Process	GO:0044403	symbiont process	10	ABCE1,ABI1,ACE2,ACY3,AMBP,AP1M1,APCS,APOA2,APOBEC3A,APOBEC3B,APOBEC3C,APOBEC3D,ATF7,ATF7IP,ATG5,ATG7,ATP6V0C,BANF1,BAX,BCL2L11,BNIP3,BNIP3L,BPIFA1,BRD4,BST2,BUB1,C19orf66,C1QBP,CAMLG,CCDC86,CCL1,CCL2,CCL3,CCL5,CCNT1,CD209,CD247,CD28,CD81,CD93,CDHR3,CDK13,CFL1,CFLAR,CHMP1A,CHMP2B,CHMP4A,CHMP4C,CHMP6,CHMP7,CLDN1,CLDN6,CLDN9,CLEC5A,COPB1,COPS6,CREB1,CREB3,CRTC2,CTBP2,CTDP1,CTSB,CTSG,CUL1,CUL2,CUL7,C…			GO: Biological Process	GO:0009117	nucleotide metabolic process	10	ABCA1,ACOT7,ACR,ADCY10,ADCY7,ADCY9,ADCYAP1,ADM,ADNP,ADORA2A,ADORA2B,ADSL,ADSS,AFMID,AK2,AK3,AK4,AK9,AKAP5,ALDOA,ALDOB,AMPD1,AMPD2,ATP1A2,ATP2B2,ATP5F1B,ATP5F1C,ATP5MC1,ATP5MF,ATP5MG,ATP5PB,ATP5PD,ATP5PF,ATP6V0A2,ATP6V0A4,BDNF,CALM1,CAP2,CASK,CAT,CEP290,CHGA,CNGB3,COX10,COX4I1,COX5B,COX6B1,COX7A2L,COX7C,COX8A,CRH,CRHR1,CRHR2,CTPS1,CXCL10,CXCL11,CXCR3,CYB5R4,CYCS,DCAKD,DCK,DCTD,DCXR,DERA,DGUOK,DLD,…			GO: Biological Process	GO:0034220	ion transmembrane transport	10	ABCA1,ABCC1,ABCC10,ABCC2,ABCC4,ACACA,ACSL6,ACTN2,ACTN4,AHNAK,AKAP6,AKT2,ANK3,ANO1,AQP10,AQP2,AQP3,AQP4,AQP6,AQP8,AQP9,ARF1,ARHGEF9,ASIC2,ASIC3,ASPH,ATOX1,ATP11C,ATP12A,ATP13A1,ATP13A2,ATP13A4,ATP1B2,ATP2A1,ATP2A2,ATP2A3,ATP2B3,ATP2C1,ATP2C2,ATP4A,ATP4B,ATP5F1A,ATP5F1B,ATP5F1D,ATP5MG,ATP5PO,ATP6AP1,ATP6V0A1,ATP6V0A4,ATP6V0B,ATP6V0C,ATP6V0D1,ATP6V0E1,ATP6V1B2,ATP6V1C1,ATP6V1C2,ATP6V1E1,ATP6V1F,ATP6…			Pathway
GO: Biological Process	GO:0060429	epithelium development	10	AARS,ACADVL,ACTA2,ADAM9,ADAMTSL4,AKR1C1,AKR1C2,ALDH3A2,ALDOC,ANGPT1,ANXA1,ARID1A,ARNTL,ATP2C1,ATP6AP2,AXIN2,B4GALT1,BCCIP,BCL10,BCL11B,BDH2,BDNF,BFSP1,BFSP2,BLOC1S6,BMP2,BMP5,BTG1,C1GALT1,CA9,CASP3,CAT,CC2D2A,CCND1,CD34,CD44,CDH2,CDH5,CELSR2,CITED1,CITED2,CLCN2,CLIC4,CLIC5,CLTC,CLUAP1,COL2A1,COL4A1,COL5A1,CPT1A,CRLF1,CRYGB,CTSB,CTSV,CUL7,CXCL10,CXCR2,CYP27B1,CYP7B1,DKK1,DKK4,DLG3,DLG5,DLL4,DLX5,D…			GO: Biological Process	GO:0018345	protein palmitoylation	5.39425	DBI,MAP6D1,ZDHHC14,ZDHHC15,ZDHHC16,ZDHHC17,ZDHHC2,ZDHHC20,ZDHHC21,ZDHHC23,ZDHHC3,ZDHHC7,ZDHHC9			GO: Biological Process	GO:0006417	regulation of translation	10	AARS,ADAR,AGO1,ATF4,BCL3,BTG2,CCL5,CPEB2,CYP1B1,DAPK1,DDX25,DICER1,DNAJC3,EEF2,EIF2AK2,EIF3B,EIF3D,EIF3H,EIF3I,EIF4A1,EIF4E3,EIF4G1,EIF4G3,ELAVL1,EP300,FAM129A,FMR1,FXR1,GAPDH,HNRNPA2B1,IGF2BP3,IL6,IREB2,KRT17,LARS,LSM14A,MKNK2,NCBP2,NCOR1,NFKB1,PAIP2,PER2,PINK1,POLDIP3,PPP1CA,PTBP1,PYM1,RPS14,S100A9,SAMD4A,STAT3,TNRC6C,TPR,TUT4,UHMK1,YBX3,ZFP36			GO: Biological Process	GO:0000278	mitotic cell cycle	10	AAAS,ABCB1,ACTR1A,ACVR1,ACVR1B,AKAP8L,AKAP9,AKT1,ANAPC13,ANAPC15,ANAPC16,ANAPC2,ANAPC4,ANAPC5,ANXA1,APC,ARHGEF10,ARHGEF2,ARPP19,ASCL1,ASNS,ASPM,BABAM1,BABAM2,BANF1,BAX,BCAT1,BCL2L1,BIRC2,BIRC6,BLM,BMP4,BMP7,BRCA2,BRD7,BRSK2,BTRC,BUB1,CALM1,CALM2,CAMK2A,CAMK2D,CARM1,CCNB2,CCNB3,CCND1,CCND2,CCNF,CCNH,CD28,CDC123,CDC14A,CDC16,CDC25A,CDC25C,CDC27,CDC34,CDC5L,CDC6,CDC73,CDH13,CDK1,CDK11A,CDK14,CDK3,CD…			GO: Biological Process	GO:0010243	response to organonitrogen compound	10	AARS,ABCC8,ABL1,ADCY8,ADCY9,ADIPOQ,ADORA2A,ADRA1B,ADRM1,AGTRAP,AGXT,AHCYL1,AKAP1,AKAP5,AKAP9,AKT1,AKT3,ALAD,ANKRD26,ANXA1,ANXA5,AP3S1,APLP1,APRT,AQP8,ARG1,ASNS,ASS1,ATP1A2,ATP2A1,ATP6AP1,ATP6V0A2,ATP6V0A4,ATP6V0B,ATP6V0C,ATP6V0D1,ATP6V1A,ATP6V1B2,ATP6V1F,BAIAP2,BAX,BCAR1,BMP7,BRAF,BSG,BTG2,CA2,CACYBP,CAD,CALM3,CAMK2A,CARD9,CAT,CBS,CCL2,CCL5,CCN2,CCND3,CDC5L,CDK1,CDK2,CDK5,CDKN1A,CFL1,CFTR,CHRNA2,…			GO: Biological Process	GO:0051726	regulation of cell cycle	10	AATF,ADCYAP1,AFAP1L2,AKT1,ANAPC16,ANXA1,APBB2,APC,ARNTL,ASNS,ASPM,ATF2,ATF5,AURKA,BAK1,BARD1,BAX,BCCIP,BCL2,BCL2L1,BCL2L11,BEX2,BID,BIN1,BIRC5,BLM,BMP2,BOP1,BRCA2,BRD4,BTC,BUB1B,C10orf99,CAB39,CABLES1,CALM1,CAMK2D,CAMK2N1,CASP3,CAV2,CCNB1,CCNB2,CCNB3,CCNC,CCND2,CCNG2,CCNI,CCNL1,CCNL2,CCNT1,CCNT2,CCNY,CCP110,CCPG1,CCSAP,CDC20,CDC23,CDC26,CDC27,CDC42,CDC45,CDC5L,CDC6,CDC7,CDC73,CDCA5,CDK10,CDK13,CD…			GO: Biological Process	GO:0023014	signal transduction by protein phosphorylation	10	ABCA7,ACTN2,ACVR1,ACVR1B,ACVRL1,ADIPOQ,ADORA2B,ADRA1A,ADRA1B,ADRB3,ALK,ALOX15,AMBP,AMHR2,ANKRD6,APIP,APOE,AR,ARAF,ARHGEF5,ASH1L,ATP6AP1,AVPI1,BMP1,BMP2,BMP4,BMP5,BMP7,BMPR1A,BMPR1B,BTC,C1QTNF1,C1QTNF2,C5,C5AR2,CALM3,CAMK2A,CAMK2B,CAMK2D,CAMK2G,CARD9,CAV2,CAVIN3,CBLC,CBS,CCKBR,CCL1,CCL11,CCL16,CCL18,CCL19,CCL2,CCL20,CCL21,CCL22,CCL23,CCL24,CCL25,CCL26,CCL3,CCL4,CCL5,CCL7,CCL8,CCM2,CCR7,CD27,CD40,C…
GO: Biological Process	GO:0042060	wound healing	10	ACTB,ADAM15,AKAP10,ALOX15,ANXA1,AP3B1,APOD,ARFGEF1,ARRB1,ASIC2,B4GALT1,BLOC1S6,C3,C6orf89,CAPZB,CASK,CASP3,CBX5,CD34,CD44,CD9,COL3A1,COL5A1,CORO1B,CX3CL1,DGKB,DGKE,DGKG,DOCK6,DYSF,ENTPD2,ERBB2,ERBB3,ERBB4,ETS1,EVL,F10,F13B,F2RL2,F7,F8,F9,FAP,FBLN1,FCER1G,FIBP,FLNA,FUT10,FYN,GNA12,GNB1,GP1BA,GP6,HBB,HNF4A,HPS1,HPSE,IGF2,IGSF10,IL1B,IL6,ITGA9,JAK2,JAML,KANK1,LAT,LCK,LMAN1,LNPK,LOX,MCAM,MFN2,MUSTN1,…			GO: Biological Process	GO:0006497	protein lipidation	5.33613	ALG5,ATG12,ATG4C,ATG7,DBI,DPM1,DPM3,MAP6D1,OAS2,PIGA,PIGL,PLAUR,PYURF,RAB3GAP1,WDR45,WIPI1,ZDHHC14,ZDHHC15,ZDHHC16,ZDHHC17,ZDHHC2,ZDHHC20,ZDHHC21,ZDHHC23,ZDHHC3,ZDHHC7,ZDHHC9			GO: Biological Process	GO:2000113	negative regulation of cellular macromolecule biosynthetic process	10	ADAR,AGO1,AIM2,ARID1A,ATAD2B,ATF3,ATF4,BASP1,BAZ2A,BCL3,BHLHE40,BIRC5,BRCA2,BTG2,CAV1,CBFA2T2,CBX5,CDKN1C,CHD8,CLOCK,CPEB2,CREBRF,CRY1,CXXC5,CYLD,CYP1B1,DAB2,DAPK1,DDIT3,DICER1,DNMT3B,E2F7,EFNA1,EHMT1,EIF2AK2,ELF3,ENO1,ENPP1,EP300,ERBIN,EZR,FLNA,FMR1,FOXF2,FOXN3,FOXP1,FOXP4,FXR1,FZD6,GAPDH,GRB10,HDGF,HES1,HIC2,HIPK2,HMGA2,HMGB2,HNRNPA2B1,HNRNPU,HSPA8,IGF2BP3,IKZF4,IRAK1,IREB2,IRF8,ITM2B,JARID2,JA…			GO: Biological Process	GO:0033238	regulation of cellular amine metabolic process	10	ABAT,ACSL3,APC,APOC1,ATP2B4,BHMT,CHRNB2,DRD1,DRD4,FABP3,GPR37,HPN,HTR2C,NR1H4,ODC1,PARK7,PAX8,PDE1B,PEBP1,PNKD,PRKCD,PRKN,PSMA1,PSMA2,PSMA3,PSMA4,PSMA5,PSMA6,PSMA7,PSMB1,PSMB10,PSMB2,PSMB3,PSMB4,PSMB5,PSMB6,PSMB7,PSMC2,PSMC3,PSMC4,PSMC5,PSMC6,PSMD10,PSMD11,PSMD12,PSMD13,PSMD14,PSMD2,PSMD3,PSMD6,PSMD7,PSMD8,PSMD9,PSME1,PSME4,PSMF1,SIRT4,TACR3			GO: Biological Process	GO:0043603	cellular amide metabolic process	10	AARS,ACACA,ACACB,ACE,ACE2,ACER3,ACO1,ADAD1,ADAMTS13,AGO1,AGO4,AIMP1,AKT1,ALDH1L1,ALOXE3,APLP1,ARG1,ASL,ASNS,ASPG,ASS1,ATF4,ATIC,ATXN2,B4GALNT1,BACE2,BANK1,BDH2,BPGM,BTG2,C1QBP,C20orf173,C9orf3,CAD,CALR,CARNS1,CARS,CARS2,CCL5,CD28,CDK5RAP1,CELF1,CELF4,CERS1,CERS2,CERS3,CHAC1,CHCHD1,CLIC2,CLIC3,CLIC6,CLN3,CLN5,CLN8,CMA1,CNDP2,CNOT1,CNOT11,CNOT7,CNOT8,CNOT9,COA3,COL4A3BP,COPS5,CPE,CPM,CPN1,CPQ,CPXM1…			GO: Biological Process	GO:0055086	nucleobase-containing small molecule metabolic process	10	ABCA1,ACOT7,ACR,ADCY10,ADCY7,ADCY9,ADCYAP1,ADM,ADNP,ADORA2A,ADORA2B,ADPRM,ADSL,ADSS,AFMID,AHCYL1,AK2,AK3,AK4,AK9,AKAP5,ALDH6A1,ALDOA,ALDOB,AMPD1,AMPD2,APIP,APOBEC1,APOBEC2,APOBEC3A,APOBEC3C,APOBEC3G,ATP1A2,ATP2B2,ATP5F1B,ATP5F1C,ATP5MC1,ATP5MF,ATP5MG,ATP5PB,ATP5PD,ATP5PF,ATP6V0A2,ATP6V0A4,BDNF,CALM1,CANT1,CAP2,CASK,CAT,CEP290,CHGA,CNGB3,COX10,COX4I1,COX5B,COX6B1,COX7A2L,COX7C,COX8A,CRH,CRHR1,CRHR…			GO: Biological Process	GO:0030003	cellular cation homeostasis	10	ABCB6,ABCB7,ABCG2,ADCYAP1R1,ADRA1A,ADRA1B,ADRA1D,AGTR2,AKAP5,AKAP6,ALAS2,ANXA7,APLP2,APOE,ARF1,ASPH,ATOX1,ATP12A,ATP13A1,ATP13A2,ATP13A4,ATP1B2,ATP2A1,ATP2A2,ATP2A3,ATP2B3,ATP2C1,ATP2C2,ATP4A,ATP5F1B,ATP6V0A1,ATP6V0A4,ATP6V0B,ATP6V0C,ATP6V0D1,ATP6V0E1,ATP6V1B2,ATP6V1C1,ATP6V1C2,ATP6V1E1,ATP6V1F,ATP6V1H,AVPR1B,BBC3,BCAP31,BDKRB1,BDKRB2,BMP4,C1QTNF1,C7,CA7,CACNA1A,CACNA1C,CACNA1F,CACNA1I,CACNA2D1,C…			Cluster [-0.045:0.133]
GO: Biological Process	GO:0050767	regulation of neurogenesis	10	ACTR3,ADCYAP1,AKAP5,ANKRD27,APP,ARHGAP4,ARHGEF1,ARNTL,ATF1,ATP8A2,AVIL,BAIAP2,BCL11B,BDNF,BMP2,BMP5,CCL5,CDC20,CDH2,CHN1,CHRNA3,CIT,CNR1,CNTN2,COL3A1,CSPG4,CUL7,CUX1,CX3CL1,DBN1,DCC,DDX6,DGUOK,DISC1,DKK1,DLL4,DPYSL2,DSCAM,EDNRB,EFNA3,EIF2B2,ENPP2,EOMES,EPOR,ERBB4,ETV5,FEZ1,FGF13,FIG4,FKBP1B,FMOD,FOXO3,FYN,FZD3,GDI1,GLI2,GPER1,GPRC5B,GRIN1,GSK3B,HEY1,HEYL,HLA-A,HNRNPK,IL1B,IL1RAP,IL1RAPL1,IL6,IMPA…			GO: Biological Process	GO:0015872	dopamine transport	5.3262	CHRNA4,CHRNB2,DRD3,ENTPD1,HTR6,KCNA2,NPY2R,OPRK1,PARK7,PRKCB,RTN4,SLC18A1,SLC18A2,SLC22A1,SLC22A2,SLC6A2,SNCA			GO: Biological Process	GO:0001568	blood vessel development	10	ADGRA2,ANGPTL3,ANKRD17,ARID1A,ATP5IF1,ATP7A,BTG1,CAV1,CCL24,CCL5,CD34,CHD7,COL4A1,COL5A1,CPLANE1,CSPG4,CXCR4,CYP1B1,DCN,DDIT3,DICER1,E2F7,EFNA1,EFNB2,EMP2,EPHB4,ERAP1,FAP,FGF18,FLNA,GATA4,HAS2,HECTD1,HEG1,HES1,HIPK2,IL1A,IL6,JAK1,KDR,KLF4,KLF5,LAMA5,LEF1,LGALS3,LOX,LOXL2,LRP1,MAP3K3,MEIS1,MRTFB,MYH9,MYO1E,MYOCD,NCL,NDNF,NEDD4,NGFR,NOTCH1,NOTCH2,PDE2A,PDE3B,PDGFRB,PRKCB,PRKD1,RASA1,RECK,RNF213,RTN…			GO: Biological Process	GO:1903364	positive regulation of cellular protein catabolic process	10	AKT1,ANAPC15,ANAPC16,ANAPC2,ANAPC4,ANAPC5,ANKIB1,ATG7,ATP5IF1,BBS7,BCAP31,BTRC,CAV3,CCDC22,CD81,CDC16,CDC27,CDK1,CDK5RAP3,CENPE,CHFR,CSNK1A1,CSNK1D,CSNK1E,CTSC,CUL1,DAB2IP,DACT1,DNAJB2,EGF,ESPL1,FBXL5,FBXO5,FMR1,FZR1,GBA,GSK3B,KEAP1,MAD2L1,MSN,NFE2L2,PLK1,PRICKLE1,PRKN,PSEN2,PSMA1,PSMA2,PSMA3,PSMA4,PSMA5,PSMA6,PSMA7,PSMB1,PSMB10,PSMB2,PSMB3,PSMB4,PSMB5,PSMB6,PSMB7,PSMC2,PSMC3,PSMC4,PSMC5,PSMC6,PS…			GO: Biological Process	GO:0044764	multi-organism cellular process	10	ABCE1,ABI1,ACE2,ACY3,AMBP,AP1M1,APCS,APOA2,APOBEC3A,APOBEC3B,APOBEC3C,APOBEC3D,ATF7,ATF7IP,ATG5,ATG7,ATP6V0C,BANF1,BAX,BCL2L11,BNIP3,BNIP3L,BPIFA1,BRD4,BST2,BUB1,C19orf66,C1QBP,CAMLG,CCDC86,CCL1,CCL2,CCL3,CCL5,CCNT1,CD209,CD247,CD28,CD81,CD93,CDHR3,CDK13,CFL1,CFLAR,CHMP1A,CHMP2B,CHMP4A,CHMP4C,CHMP6,CHMP7,CLDN1,CLDN6,CLDN9,CLEC5A,COPB1,COPS6,CREB1,CREB3,CRTC2,CTBP2,CTDP1,CTSB,CUL1,CUL2,CUL7,CXCL8,…			GO: Biological Process	GO:1903047	mitotic cell cycle process	5.99866	ACTR8,ACVR1B,AKAP8L,AKT1,ALMS1,ANAPC16,ANK3,ANXA1,APC,ARHGEF10,ARL8A,ARPP19,ASPM,ATF2,AURKA,BABAM1,BACH1,BANF1,BAX,BCL2,BCL2L1,BID,BIN3,BIRC5,BLM,BRD4,BRSK1,BRSK2,BTC,BUB1B,CABLES1,CALM1,CAMK2D,CAMK2G,CAV2,CCNB1,CCNB2,CCNB3,CCND2,CCNG2,CCNY,CCP110,CCSAP,CDC20,CDC23,CDC26,CDC27,CDC42,CDC45,CDC6,CDC7,CDC73,CDCA5,CDCA8,CDK10,CDK13,CDK3,CDKN2A,CDKN2D,CDT1,CENPC,CENPE,CENPH,CENPJ,CENPN,CENPS-CORT,CEP1…			GO: Biological Process	GO:0030335	positive regulation of cell migration	10	AAMP,ABCC1,ACP5,ACTN4,ACVR1,ACVR1B,ADAM10,ADAM17,ADORA3,AKT2,ALOX12,AMOT,AMOTL1,ANGPT4,ANXA3,ARHGAP5,ARHGEF7,ATOH8,BCAR1,BCAS3,BDKRB1,BMP2,BMP4,C1QBP,CAMK2D,CBLL1,CCBE1,CCL11,CCL19,CCL2,CCL20,CCL21,CCL24,CCL26,CCL3,CCL4,CCL5,CCL7,CCL8,CCR7,CD274,CDH13,CEMIP,CGA,CORO1A,CSF1,CXCL1,CXCL12,CXCL16,CXCL2,CXCL3,CXCL6,CXCL9,CXCR2,DAB2,DAB2IP,DAPK2,DAPK3,DDR2,DMTN,DRD1,EDN2,EDNRA,EGR1,ELANE,ELP1,ELP5,ENPP…			Category
GO: Biological Process	GO:0048870	cell motility	10	ABHD2,ABHD6,ABI2,ADAM10,ADAM15,ADAM8,ADAM9,ADGRL3,ADORA1,ADORA3,ANGPT1,ANXA1,APOB,APOD,ARAP3,ARHGAP4,ARHGAP5,ARHGDIB,ARHGEF16,ARPC2,ASTN1,ATP2B4,AVL9,B4GALT1,BAG4,BCR,BMP2,BMP5,BTG1,C5orf30,CACNA1E,CALCA,CAPN7,CATSPER3,CCK,CCKAR,CCL18,CCL2,CCL23,CCL5,CD2,CD2AP,CD34,CD44,CD47,CDH13,CDH2,CELSR2,CEMIP,CGA,CHST4,CITED2,CKLF,CLIC4,CLN3,CNR2,CNTN2,COL3A1,COL5A1,CORO1A,CORO1B,CSPG4,CX3CL1,CXCL10,CXCL11,…			GO: Biological Process	GO:0071345	cellular response to cytokine stimulus	5.31564	ACKR3,AKAP6,ASS1,BAD,BIRC2,BIRC3,CALCA,CAMK2B,CAMK2D,CAV1,CCL20,CCL21,CCL25,CCL26,CCR1,CCR4,CCR7,CD86,CDC37,CHI3L1,CISH,CLDN18,COMMD7,CORO1A,CX3CR1,CXCL1,CXCL11,CXCL13,CXCL8,CXCR2,CXCR4,CXCR5,CXCR6,DAPK3,DDX41,DPYSL3,EDA2R,FGA,FGB,FLRT1,FLRT2,FLRT3,FOXF1,GAPDH,GHR,GSK3A,HPX,HYAL2,IFI27,IFI35,IFI6,IFIT2,IFITM2,IFITM3,IFNLR1,IL12RB2,IL17A,IL17RD,IL18R1,IL1B,IL1R2,IL1RAP,IL22RA2,IL36G,IL36RN,IL4R,IL…			GO: Biological Process	GO:0010256	endomembrane system organization	10	AP2M1,ARF6,ARFGEF1,ARL6IP1,ATL2,ATP8B3,C16orf70,CAV1,CAV2,CLIP1,COL5A1,CSK,CXCR4,DAB2,DNAJC13,EMP2,EZR,FA2H,GBF1,GBP1,GOLGA2,GOLGB1,GPR158,HECTD1,KCNIP4,LAMA5,LDLRAP1,LMAN1,LMNA,LNPK,LYST,MAP7,MYADM,MYO5A,MYOF,NDRG1,NEK9,NPLOC4,NUMB,NUP205,NUP210,NUP214,NUP54,NUP58,OPTN,PDCD6IP,PDPK1,PDZK1,PLSCR1,PPIL2,PRKCB,PRKCZ,PRKD1,PTBP1,PTCH1,RAB27A,RAB34,RAB5A,RAB5C,RBSN,RDX,REEP1,REEP4,RTN4,S100A9,SEC16A,…			GO: Biological Process	GO:0001775	cell activation	10	ABAT,ABR,ACTB,ACTG1,ADAM8,ADAM9,ADAMTS18,ADK,ADORA2B,ADORA3,ADRM1,AGT,AKT1,ALOX12,ANXA1,ANXA3,AP3B1,APBB1IP,APC,ARRB1,ATP11C,AXL,AZU1,BAK1,BANK1,BATF,BATF2,BAX,BCL10,BCL11A,BCL11B,BCL2A1,BCL3,BLM,BLNK,BMP4,BRAF,BST1,BTN1A1,BTN3A1,C1GALT1C1,CADM1,CAMK4,CAPN3,CASP1,CASP3,CASP8,CBLB,CCL13,CCL19,CCL21,CCL3,CCL5,CCR9,CD180,CD1C,CD2,CD200,CD226,CD244,CD27,CD274,CD28,CD37,CD38,CD3D,CD3E,CD3G,CD40,CD5,CD…			GO: Biological Process	GO:0016032	viral process	10	ABCE1,ABI1,ACE2,ACY3,AMBP,AP1M1,APCS,APOA2,APOBEC3A,APOBEC3B,APOBEC3C,APOBEC3D,ATF7,ATF7IP,ATG5,ATG7,ATP6V0C,BANF1,BAX,BCL2L11,BNIP3,BNIP3L,BRD4,BST2,BUB1,C19orf66,C1QBP,CAMLG,CCDC86,CCL1,CCL2,CCL3,CCL5,CCNT1,CD209,CD247,CD28,CD81,CD93,CDHR3,CDK13,CFL1,CFLAR,CHMP1A,CHMP2B,CHMP4A,CHMP4C,CHMP6,CHMP7,CLDN1,CLDN6,CLDN9,CLEC5A,COPB1,COPS6,CREB1,CREB3,CRTC2,CTBP2,CTDP1,CTSB,CUL1,CUL2,CUL7,CXCL8,CXCR6,D…			GO: Biological Process	GO:0045862	positive regulation of proteolysis	5.91882	ADRM1,AIM2,AKIRIN2,AKT1,ANAPC16,APAF1,ARIH1,ARL6IP5,ASPH,ATG7,AURKA,AXIN1,BAK1,BAX,BBC3,BBS7,BCAP31,BCL10,BCL2L11,BCL2L13,BEX3,BID,BUB1B,CAPN3,CARD8,CASP1,CASP3,CASP8,CAV1,CCDC22,CCN1,CCNB1,CDC20,CDC23,CDC26,CDC27,CDKN2A,CENPE,CHFR,CIDEB,CLEC3B,CNTN2,CRADD,CSNK1D,CSNK1E,CYCS,CYFIP2,DAP,DAPK1,DDRGK1,DISC1,DNAJB2,EGF,EGLN3,EP300,F12,F2R,F3,FADD,FASLG,FBXW11,FIS1,GCLC,GPER1,HMGB1,HSF1,HSPA8,HSPBP1,H…			GO: Biological Process	GO:1901698	response to nitrogen compound	10	AACS,ABAT,ABCC2,ABCG2,ACTN2,ADCY1,ADCY8,ADCY9,ADIPOQ,ADRA1B,ADRM1,ADSS,AGO1,AGTR2,AGTRAP,AGXT,AHSG,AIFM1,AKAP5,AKAP6,AKT2,AKT3,ALDOB,AOC1,AP3S1,APLP1,APOBEC1,AQP8,AQP9,ARG1,ASPH,ASS1,ATP2A1,ATP2A2,ATP4B,ATP6AP1,ATP6V0A1,ATP6V0A4,ATP6V0B,ATP6V0C,ATP6V0D1,ATP6V0E1,ATP6V1B2,ATP6V1C1,ATP6V1C2,ATP6V1E1,ATP6V1F,ATP6V1H,AVPR1B,AVPR2,BAIAP2,BAIAP2L1,BCAR1,BCDIN3D,BCHE,BGLAP,BMP4,BMP7,BSG,CALM3,CAMK2A,CAR…			GO: Biological Process
GO: Biological Process	GO:0050817	coagulation	10	ACTB,AKAP10,AP3B1,ARRB1,ASIC2,BLOC1S6,C3,CAPZB,CBX5,CD34,CD9,COL3A1,CX3CL1,DGKB,DGKE,DGKG,DOCK6,ENTPD2,EVL,F10,F13B,F2RL2,F7,F8,F9,FAP,FBLN1,FCER1G,FIBP,FLNA,FYN,GNA12,GNB1,GP1BA,GP6,HBB,HNF4A,HPS1,HPSE,IL6,JAK2,LAT,LCK,LMAN1,LNPK,MFN2,MYH9,MYL9,P2RX2,P2RX3,P2RX6,PDGFA,PDGFRA,PDPN,PF4,PF4V1,PIK3R1,PLAT,PRCP,PRDX2,PRKACB,PRKCA,PRKCE,PRKCH,PROCR,PSEN1,PTPN11,PTPRJ,RAB5A,SERPINA10,SERPINB2,SERPINC1,…			GO: Biological Process	GO:0008284	positive regulation of cell proliferation	5.3083	ADCYAP1,AGAP2,AGGF1,AGTR2,APLN,AR,ATXN1,AVPR1A,B4GALT1,BAD,BAMBI,BLM,BMP10,BMP2,BMP4,BMP5,BMPR2,BNC1,BRK1,C3AR1,C5AR2,CALR,CAMK2D,CAMP,CASR,CAV1,CCAR1,CCL26,CCR7,CD244,CD3E,CD47,CD55,CD6,CD86,CDX2,CGA,CHRNB2,CLDN7,CNOT7,CORO1A,CSF2,CX3CR1,CXCR2,DLX6,DPP4,DPPA2,DRD3,EGFL7,EIF5A2,ESM1,ESRP1,ESRP2,ETV5,EYA1,FABP4,FASLG,FGF1,FGF17,FGF18,FGF19,FGF21,FGF3,FGF5,FGFR1OP,FGFR3,FOXF1,FZD3,GAB2,GATA6,GCNT2,…			GO: Biological Process	GO:0071495	cellular response to endogenous stimulus	10	ACSL1,ACVR1C,ADAM17,ADAMTS7,ADCYAP1,AKAP13,ALPP,AP3S1,AQP9,ARID1A,ASNS,ATP6V0A2,ATP6V1B1,ATP6V1C2,CAD,CARM1,CAV1,CAV2,CCL5,CDKN1C,CHRDL1,CHRDL2,CLOCK,COL4A1,CPEB2,CPS1,CREBRF,CRY1,CSK,CTNNA1,DAB2,DNMT3B,DSTYK,EEF2,EHD1,ENPP1,EP300,ESRRG,EZR,FBN1,FBN2,FGF18,FGF23,FOS,FOXP1,FSTL1,FSTL3,GABRB1,GATA4,GLG1,GLRA3,GRB10,HAS2,HES1,HIPK2,HNRNPM,HNRNPU,HSP90B1,HTR2B,HTRA1,IGFBP1,IL6,INHBA,IPO5,ITPR1,ITPR2,…			GO: Biological Process	GO:0006520	cellular amino acid metabolic process	10	AARS,AASDHPPT,AASS,ABAT,ACAT1,ADSS,AGMAT,AGXT,AGXT2,AHCY,AHCYL1,AHCYL2,ALDH1L1,ALDH5A1,ALDH6A1,ALDH7A1,APC,ARG1,ART4,ASL,ASNS,ASPA,ASS1,ATG7,ATIC,ATP2B4,ATP5IF1,AUH,BAAT,BCAT1,BCKDK,BHMT,BHMT2,BPHL,CARNS1,CARS,CBS,CDO1,CLN3,CNDP2,CRYM,CTPS1,CTPS2,DALRD3,DARS,DARS2,DCT,DDAH1,DDO,DHFR,DNMT3A,EEF1E1,EGLN1,EIF2B2,ENOPH1,ENOSF1,ERO1B,FAH,FARS2,FARSA,FARSB,FTCD,GAD1,GAD2,GARS,GATB,GATM,GCAT,GCLM,GFPT1,…			GO: Biological Process	GO:0009967	positive regulation of signal transduction	10	AAK1,ABL1,ACPP,ACVR1B,ACVR2A,ADAM8,ADGRG1,ADIPOQ,ADORA2A,ADRA1A,ADRA1B,ADRM1,AFAP1L2,AGPAT2,AKAP13,AKAP5,AKT1,ALOX15B,ALS2,ANGPT1,ANKRD6,APAF1,APOL3,ARAF,ARAP1,ARHGAP1,ARHGAP4,ARL6IP5,ARNTL,ARPP19,ARRB1,ARRDC3,ASPM,ATF3,ATP2C1,ATP6AP1,ATP6V0C,ATR,AVPI1,AXIN1,AXIN2,BANK1,BAX,BCL2L11,BCL2L14,BCLAF1,BMP3,BMP5,BMP6,BMP7,BMP8B,BMPR1B,BNIP2,BNIP3,BRAF,BRD4,BST2,BUB1,C1QBP,C1QTNF1,C5,C5AR2,CALM3,CALR,CA…			GO: Biological Process	GO:0006396	RNA processing	5.87564	AAR2,ABT1,ADAT1,AFF2,AGO1,AGO2,AGO4,AHCYL1,AKAP8L,APOBEC1,APOBEC2,BARD1,BCAS2,BCDIN3D,BMS1,BMT2,BOP1,BRDT,BUD13,BYSL,C2orf49,CASC3,CCAR1,CCNB1,CCNL1,CCNT1,CD2BP2,CDC40,CDC5L,CDC73,CDK13,CDK9,CDKN2A,CELF2,CELF5,CELF6,CHERP,CHTOP,CIR1,CLASRP,CLK1,CLK2,CLK3,CLK4,CLP1,CMTR1,CNOT7,CPSF1,CPSF2,CPSF3,CPSF4,CPSF6,CRNKL1,CSNK1D,CSNK1E,DAZAP1,DDX20,DDX23,DDX39A,DDX41,DDX46,DDX54,DDX56,DGCR8,DHX30,DHX33,DHX…			GO: Biological Process	GO:0001501	skeletal system development	10	ABI1,ACAN,ACD,ACP5,ACVRL1,ADAMTS7,AEBP1,AES,AHSG,ALPL,ALX3,ALX4,AMELX,ANKRD11,ARSE,ATP6AP1,AXIN2,BARX2,BGLAP,BMP1,BMP2,BMP4,BMP5,BMP7,BMPR1A,BMPR1B,CACNA1S,CADM1,CBS,CDH11,CER1,CHAD,CHRD,CHST11,CHSY1,CITED2,CLDN18,CNMD,COL10A1,COL1A2,COL2A1,COL3A1,COL5A2,COL9A1,COL9A2,COMP,CSRNP1,CST5,CTC1,DCHS1,DLG1,DLK1,DLL3,DLX2,DLX5,DSCAML1,DYM,EIF4A3,EN1,EPHA2,EXT1,EYA1,FBN1,FBXW4,FGF8,FGF9,FGFR2,FGFR3,FLVCR…			GO: Biological Process
GO: Biological Process	GO:0046890	regulation of lipid biosynthetic process	10	ABHD6,ACADVL,ANXA1,APOB,ATG7,ATP1A1,BMP2,BMP5,C3,CREBL2,CYP27B1,CYP7A1,DHCR7,EIF6,ERLIN1,ERLIN2,FBXW7,FDPS,FGF1,FGF19,FGFR4,GPER1,HNF4A,HTR2A,HTR2C,IGF2,IGFBP7,IL1B,INSIG1,LHCGR,MID1IP1,NR1H3,NT5E,ORMDL1,ORMDL2,PC,PDGFA,PDK4,PEX2,PLA2G6,PRKAB2,PROX1,RGN,SF1,SMPD2,SNAI2,SORBS1,STAR,ZP3			GO: Biological Process	GO:0007417	central nervous system development	5.30203	ADCYAP1,ADGRA2,ADORA2A,AGTR2,ANXA3,ARF4,ARHGAP35,ARSB,ATF5,ATG7,ATN1,AVPR1A,BAD,BASP1,BAX,BCAN,BMP2,BMP4,BMPR2,CDH11,CDH22,CDK5RAP2,CHRNB2,CITED2,CLN8,CNTN2,CNTN4,COX7B,CRHR2,CTNNA2,CX3CR1,CXCR4,DBI,DDIT4,DKK1,DMRT3,DNAH5,DPYSL2,DRD3,DRP2,DYNLL1,ECE2,EGR2,EIF2B3,EOMES,EPHB3,EZH2,FA2H,FGF13,FGFR3,FRS2,FZD3,GABRA4,GART,GHRHR,GLI3,GNAO1,GRHL2,H3F3B,HDAC1,HNMT,HNRNPD,HOXA2,HOXD10,HPCAL4,HTR6,ID1,ID2,…			GO: Biological Process	GO:0043043	peptide biosynthetic process	10	AARS,ADAR,AGO1,ATF4,BCL3,BTG2,CCL5,CPEB2,CYP1B1,DAPK1,DDX25,DICER1,DNAJC3,EEF2,EIF2AK2,EIF3B,EIF3D,EIF3H,EIF3I,EIF4A1,EIF4E3,EIF4G1,EIF4G3,ELAVL1,EP300,FAM129A,FMR1,FXR1,GAPDH,GCLM,HNRNPA2B1,IGF2BP3,IL6,IREB2,KARS,KRT17,LARS,LRRC47,LSM14A,METTL17,MKNK2,MRPL12,MRPL32,MRPL34,MRPL48,MRPL51,MRPS15,NCBP2,NCOR1,NFKB1,PABPC4,PAIP2,PER2,PINK1,POLDIP3,PPA1,PPP1CA,PTBP1,PYM1,RPL13,RPL19,RPL23,RPL27,RPL27A,…			GO: Biological Process	GO:0045665	negative regulation of neuron differentiation	10	APBB1,ARF6,ASAP1,ASCL1,ASPM,BCL11A,BMP7,CALR,CARM1,CASZ1,CDK5RAP2,CDKL3,CIT,CNTF,CNTN2,CRMP1,CSPG4,DCC,DDX6,DTX1,EFEMP1,EIF4E,EIF4ENIF1,EPHB2,FAT3,FGF13,FKBP4,FOXA2,FSTL4,FUOM,GDF11,GFAP,GFI1,GORASP1,GPR37L1,GSK3B,HES1,HLA-A,HMG20A,IFRD1,IL1B,ISL1,ITM2C,KIAA0319,KLK8,LBX1,LGALS1,LPAR1,LRP1,LRP4,LSM1,MAG,MAP4K4,MEIS1,MT3,NBN,NFATC4,NGEF,NKX2-2,NLGN1,NLGN3,NOTCH1,NOTCH3,NR2F1,NRP1,NTN1,PBX1,PHOX2B,…			GO: Biological Process	GO:0000165	MAPK cascade	10	ABL1,ACE2,ADAM8,ADIPOQ,ADRA1A,ADRA1B,AKAP13,AKAP9,AKT1,AMBP,ANGPT1,ANKRD26,ANKRD6,ARAF,ARL6IP5,ARRB1,ASH1L,ATF3,ATP6AP1,AVPI1,AXIN1,BANK1,BMP3,BMP5,BMP6,BMP7,BMP8B,BNIP2,BRAF,BRAP,C1QTNF1,C3orf33,C5,C5AR2,CALM3,CAMK2A,CAMK2B,CAMK2G,CARD9,CAV3,CAVIN3,CBS,CCL1,CCL11,CCL13,CCL16,CCL18,CCL19,CCL2,CCL20,CCL21,CCL22,CCL23,CCL24,CCL26,CCL3,CCL5,CCL8,CCM2,CCN2,CCR1,CD27,CD44,CD74,CD81,CDC42,CDC42EP5,CDC4…			GO: Biological Process	GO:0032880	regulation of protein localization	5.83715	AACS,AAK1,ABCC8,ACSL3,ACSM6,ACTN2,ADCYAP1,ADIPOQ,ADORA2A,AGT,AIM2,AKAP1,AKAP5,AKT1,ANK3,ANXA1,ANXA13,ANXA5,APC,APOA2,APPL1,AR,ARF1,ARHGDIG,ARHGEF16,ARHGEF5,ARL2BP,ARNTL,ASPH,ATCAY,ATG13,ATG7,AXIN1,B3GAT3,BAMBI,BARD1,BBC3,BCAP31,BCL2,BCL2L1,BCL2L11,BID,BIRC5,BLK,BMPR1A,BNIP3L,BRSK2,BTN1A1,C1QTNF3,C2CD2L,C2CD5,C5AR2,CACNA1D,CACNA1E,CACNA2D2,CAMK4,CARD8,CASP1,CASP4,CASP8,CASR,CAV2,CCDC22,CCL13,CCL19…			GO: Biological Process	GO:0030855	epithelial cell differentiation	10	ABCA12,ACADVL,ACER1,ACTA2,ACVR1,ACVRL1,ADAMTS20,ADAMTSL4,ADIPOQ,ADRM1,AFDN,AGR2,AKR1C2,AKT2,ALG10,ALOX12,ANXA4,ANXA7,AQP3,AR,ARID4A,ARID4B,ARX,ATOH8,B4GALT1,B9D1,BARX1,BASP1,BFSP1,BFSP2,BMP2,BMP4,BMP5,BMP7,BMPR1A,BTG1,CAPN5,CASP14,CASP6,CBFA2T2,CCM2,CD109,CDC42,CDH1,CDH5,CDHR2,CDX2,CERS3,CGN,CITED1,CLDN5,CLRN1,CNFN,CNMD,CNN3,COL4A1,CPS1,CPT1A,CRCT1,CRHR1,CRHR2,CRYAA,CRYGD,CSTA,CUL7,CYP27B1,DAB2,D…			GO: Biological Process
GO: Biological Process	GO:0055114	oxidation-reduction process	10	AASS,ABCC4,ACADVL,ACO1,ADI1,ADRA1B,AKR1C1,AKR1C2,AKR7A3,ALDH18A1,ALDH3A2,ALDH4A1,ALDH6A1,ALDH8A1,ALDOC,ALKBH7,ALOX15,AMACR,AOC1,AOX1,APOD,BBOX1,BCKDHB,BCO1,BDH2,BDNF,BMP2,C1orf43,CALM2,CAT,CBFA2T3,CBS,CHCHD4,CNR1,CPT1A,CPT1B,CPT1C,CREG1,CRYL1,CRYZ,CRYZL1,CTBP2,CYB5A,CYB5B,CYB5R2,CYB5R4,CYBA,CYBRD1,CYP20A1,CYP27A1,CYP27B1,CYP2A13,CYP2E1,CYP2F1,CYP2J2,CYP2U1,CYP46A1,CYP7A1,CYP7B1,DECR1,DHCR7,DHRS7B…			Pathway	83036	Ribosome	5.78974	MRPL1,MRPL13,MRPL15,MRPL35,MRPL36,MRPS10,MRPS15,MRPS17,MRPS21,MRPS7,RPL10,RPL15,RPL17,RPL19,RPL22,RPL22L1,RPL23,RPL27,RPL27A,RPL28,RPL3,RPL31,RPL32,RPL34,RPL35A,RPL36,RPL37,RPL5,RPL9,RPS12,RPS13,RPS14,RPS16,RPS19,RPS2,RPS21,RPS24,RPS26,RPS3,RPS5,RPS6,RPS7,RPS8,UBA52			GO: Biological Process	GO:0048545	response to steroid hormone	10	ABCA3,ACTA1,ADCYAP1,AKAP13,ALAD,ALDH3A1,ARID1A,BRCA2,CAD,CALM2,CARM1,CATSPERB,CAV1,CCL5,CLOCK,CPS1,CREBRF,CRY1,CTNNA1,DAB2,DNMT3B,DSG2,EEF2,ENDOG,EP300,ESRRG,FOS,FOXP1,GABRB1,GAL,GATA4,HMGB2,HNRNPU,IL6,KANK2,KLF9,KRT19,LEF1,LOX,MDK,MECP2,MED12,MED4,MSN,NCOA2,NCOA3,NEDD4,NOTCH1,NR2F6,NR4A2,PARK7,PDCD7,PDGFRB,PELP1,PLPP1,PTCH1,PTGES3,PTGFR,PTPRU,RBFOX2,RNF6,RORC,SDC1,SHC1,SIRT1,SMARCA4,SOCS3,STAT3,…			GO: Biological Process	GO:0030335	positive regulation of cell migration	10	AAMP,ABCC1,ACP5,ACVR1,ACVR1B,ADAM8,ADAM9,ADORA3,AGT,AKT1,ALOX12,AMOT,ANGPT4,ANXA3,APC,AQP1,ARHGAP5,ATP8A1,BAG4,BDKRB1,BMP4,BMPR2,C1QBP,CALR,CAMK1D,CAMK2D,CAPN7,CARMIL1,CCL11,CCL13,CCL19,CCL20,CCL21,CCL24,CCL26,CCL3,CCL4,CCL5,CCL8,CD274,CDH13,COL18A1,COL1A1,CORO1A,CSF1,CSF1R,CXCL1,CXCL10,CXCL11,CXCL13,CXCL16,CXCL5,CXCL6,CXCL9,CXCR2,DAB2IP,DAPK2,DMTN,DRD1,EDN3,EGFR,ELANE,ELP1,ELP3,ENPP2,EPB41L4B,EP…			GO: Biological Process	GO:0009126	purine nucleoside monophosphate metabolic process	10	ADK,ADSSL1,AK1,AK5,ALDOC,AMPD1,APRT,ATIC,ATP1A2,ATP1B1,ATP5F1A,ATP5F1C,ATP5F1D,ATP5MC1,ATP5MC2,ATP5MF,ATP5MG,ATP5PB,ATP5PD,ATP5PF,ATP5PO,ATP6V0A2,ATP6V0A4,ATP6V1A,ATP6V1B2,BPGM,CARD11,COX15,COX4I1,COX5A,COX5B,COX6B1,COX7A2L,COX7C,COX8A,CTNS,CYC1,DLG1,DLG3,DLG4,DNAJC15,EIF6,ENO1,ENO3,ENTPD5,FBP1,FXN,GADD45GIP1,GALE,GALT,GART,GCK,GPI,HIF1A,HK1,HK2,HSPA8,INSR,KHK,LDHA,MIF,MLXIPL,MPI,MPP3,MYH3,MYH7,M…			GO: Biological Process	GO:0072521	purine-containing compound metabolic process	5.83126	ABCA1,ACOT7,ACR,ADCY10,ADCY7,ADCY9,ADCYAP1,ADM,ADNP,ADORA2A,ADORA2B,ADSL,ADSS,AHCYL1,AK2,AK3,AK4,AK9,AKAP5,ALDOA,ALDOB,AMPD1,AMPD2,APIP,ATP1A2,ATP2B2,ATP5F1B,ATP5F1C,ATP5MC1,ATP5MF,ATP5MG,ATP5PB,ATP5PD,ATP5PF,ATP6V0A2,ATP6V0A4,BDNF,CALM1,CAP2,CASK,CAT,CEP290,CHGA,COX10,COX4I1,COX5B,COX6B1,COX7A2L,COX7C,COX8A,CRH,CRHR1,CRHR2,CXCL10,CXCL11,CXCR3,CYCS,DCAKD,DCK,DGUOK,DLD,DLG1,DLG2,DLG3,DLG4,DMAC2L,D…			GO: Biological Process	GO:0009792	embryo development ending in birth or egg hatching	10	ABCG2,ABI1,ACVR1,ACVR1B,ACVRL1,ADAM10,ADD1,ALDH1A2,ALPI,ALX3,ALX4,AMOT,ANKRD11,APAF1,APBA1,APBA2,APBA3,APOB,AR,ARHGAP35,ARNT2,ASCL2,AXIN2,B9D1,BIRC6,BMP2,BMP4,BMP7,BMPR1A,BRCA2,BRK1,BTF3,C5,CASP8,CC2D2A,CCM2,CCNB2,CDH1,CDK11A,CDX2,CDX4,CELSR1,CFL1,CHD8,CHRD,CHST11,CITED1,CITED2,COL2A1,COPS3,CTHRC1,CUBN,DAB2,DACT1,DCHS1,DDX5,DLC1,DLG1,DLK1,DLL3,DLX2,DSCAML1,DUSP3,DVL2,DVL3,E2F7,E2F8,ECE1,EDNRA,EIF…			GO: Biological Process
GO: Biological Process	GO:0043436	oxoacid metabolic process	10	AARS,AASS,ABCB11,ABHD12,ACADVL,ACLY,ACO1,ACOT2,ACOT7,ACSL4,ADI1,AGMAT,AHCY,AKR1C1,AKR1C2,ALDH18A1,ALDH3A2,ALDH4A1,ALDH6A1,ALDH8A1,ALDOC,ALKBH7,ALOX15,AMACR,ANGPT1,ANXA1,AS3MT,ASNS,ASRGL1,ATF4,ATG7,ATP2B4,AUH,B3GAT1,B3GAT3,B3GNT7,B4GALT1,B4GALT6,BBOX1,BCKDHB,BDH2,BPGM,BPHL,BPNT1,BTD,C3,CAD,CARNS1,CARS,CBFA2T3,CBS,CHPF,CHST7,CLN3,CNDP2,CNR1,COMT,CPT1A,CPT1B,CPT1C,CREM,CRTAP,CRYL1,CSPG4,CTPS2,CYB5A,…										GO: Biological Process	GO:0048646	anatomical structure formation involved in morphogenesis	10	ABCC4,ABLIM1,ACTA1,ACTG1,ACTN1,ADAM17,ADGRA2,AKAP13,ALDH1A3,ANGPTL3,ARID1A,ARL13B,ATP5IF1,ATP7A,BBS9,BCL10,BCL2L11,BCL3,BTG1,CAV1,CCL24,CCL5,CCNG1,CD34,CELSR1,CEP135,CEP162,COL12A1,COL4A1,COL5A1,CPLANE1,CSPG4,CXCR4,CYLD,CYP1B1,DAG1,DCN,DICER1,DVL2,E2F7,EDAR,EFNA1,EFNB2,EHD1,EMP2,EP300,EPHB4,ERAP1,EVI5L,FAP,FBN2,FGF18,FLNA,FZD6,GATA4,GNPAT,HECTD1,HES1,HIPK2,HMGA2,HOXB1,HS2ST1,HTRA1,IL1A,IL6,INHBA,…			GO: Biological Process	GO:0051223	regulation of protein transport	10	AACS,ABAT,ACSL3,ACSM6,ADAM8,ADAM9,ADIPOQ,AGT,AGTR1,AKAP1,AKAP6,ANXA1,APBB1,APOA2,APOD,ARF1,ARL2,ARL2BP,ARRB1,ASPH,ATG7,ATP13A2,ATP5IF1,AXIN2,BAG4,BANK1,BAP1,BCAP31,BCL3,BLK,BMP4,BMP7,BRSK2,BTN1A1,C1QTNF3,CABP1,CACNA1C,CACNA1E,CACNA2D2,CADM1,CAMK4,CAMP,CARD8,CASP1,CASR,CCDC22,CCL13,CCL19,CCL3,CCL5,CCN3,CD14,CD2,CD244,CD27,CD274,CD34,CD38,CD40,CD84,CDK1,CDKL2,CDKN1A,CFTR,CHCHD4,CHERP,CHIA,CLEC4E,CL…			GO: Biological Process	GO:0043604	amide biosynthetic process	10	AARS,ACO1,ADAD1,AGO1,AGO4,AIMP1,AKT1,ALOXE3,APLP1,ARG1,ASL,ASNS,ASS1,ATF4,ATIC,ATXN2,B4GALNT1,BANK1,BDH2,BTG2,C1QBP,C20orf173,CAD,CALR,CARNS1,CARS,CARS2,CCL5,CD28,CDK5RAP1,CELF1,CELF4,CERS1,CERS2,CERS3,CHAC1,CHCHD1,CLN8,CNDP2,CNOT1,CNOT11,CNOT7,CNOT8,CNOT9,COA3,COPS5,CTIF,DAPK1,DAPK3,DARS2,DAZL,DDX1,DDX6,DENR,DHX29,DNAJC1,DTD1,EEF1A2,EEF1D,EEF1E1,EEF2,EEF2K,EEFSEC,EFL1,EFTUD2,EGFR,EIF1,EIF1AY,EIF…			GO: Biological Process	GO:0031400	negative regulation of protein modification process	5.81022	ADIPOQ,ADORA2A,AHSG,AKAP1,AKT1,AMBP,ANAPC16,ANKRD26,ANKS1A,APC,ARFGEF3,ASH1L,ASPN,ATG14,ATG7,BAK1,BAX,BCOR,BDKRB2,BGN,BUB1B,CALM1,CAMK2N1,CAPN3,CASP3,CAV1,CCNB1,CD2BP2,CDC20,CDC23,CDC26,CDC27,CDK5,CDKN1C,CDKN2A,CDKN2D,CEP85,CHAD,CHORDC1,CHP1,CORO1C,CRY1,CRY2,CRYBA1,CSK,CSRNP2,CSRNP3,CTBP1,CTDSPL,DAG1,DKK1,DLG1,DLG2,DLG3,DMD,DMTN,DNAJB2,DNAJC10,DNAJC3,DUSP1,DUSP14,DUSP22,DUSP26,DUSP3,DUSP4,DUSP5,D…			GO: Biological Process	GO:1901135	carbohydrate derivative metabolic process	10	ABCA1,ABCA7,ABHD14B,ACACA,ACAN,ACOT7,ACOT8,ACR,ADAMTS13,ADAMTS7,ADAMTSL1,ADAMTSL4,ADCY1,ADCY10,ADCY8,ADCY9,ADCYAP1R1,ADGRD1,ADK,ADORA2B,ADPGK,ADRB3,ADSS,ADSSL1,AHCY,AIPL1,AK1,AK2,AK3,AK4,AK9,AKAP5,AKAP6,AKR1A1,AKR1B10,AKR1C2,AKR7A2,ALDH1A1,ALDOA,ALDOB,ALG1,ALG10,ALG12,ALG14,ALG3,ALG9,AMDHD2,AMPD1,AMPD3,AP2A1,APCS,APIP,APLP1,APOBEC1,APOBEC2,APOBEC3C,APOE,ARF4,ARFGEF1,ARSA,ARSB,ARSD,ARSE,ARSG,ARSI,…			GO: Biological Process
GO: Biological Process	GO:0060341	regulation of cellular localization	10	ACTL6A,ACTN2,ADAM8,ADAM9,ADCYAP1,ADORA1,ADORA3,AIM2,AKAP5,ANGPT1,ANXA1,ANXA13,AP1G1,APOD,ARHGEF16,ARL2BP,ARNTL,ARRB1,ASIC1,ATG7,ATP6AP1,AXIN2,B3GAT3,B4GALT1,BAG4,BANK1,BCAP31,BCR,BNIP3L,C1QTNF3,C2CD5,CABP1,CACNA1E,CACNA1G,CACNA2D2,CADM1,CALCA,CALM2,CAMP,CASQ2,CAV2,CCK,CCKAR,CCKBR,CCL2,CCL5,CD2,CD2AP,CD34,CDH2,CEMIP,CHCHD4,CHRNA3,CHRNA4,CLTC,CLTRN,CNR1,CORO1A,CPLX1,CPT1A,CRH,CX3CL1,CXCL10,CXCL11,C…			Cluster [-0.083:0.087]							GO: Biological Process	GO:0034620	cellular response to unfolded protein	10	AARS,ACADVL,ASNS,ATF3,ATF4,ATF6,BBC3,BCL2L11,CREB3,CREB3L2,CREBRF,DDIT3,DNAJB9,DNAJC3,EDEM2,EIF2AK2,EP300,HDGF,HERPUD1,HSP90B1,HYOU1,IGFBP1,LMNA,PARP16,PDIA5,SEC31A,SHC1,TLN1,XBP1			GO: Biological Process	GO:0003015	heart process	10	ACE,ACE2,ACTC1,ADORA1,ADRA1B,AGT,AHCYL1,AKAP6,AKAP9,APLN,ASPH,ATP1B2,ATP1B3,ATP2A1,ATP2B1,ATP2B3,ATP2B4,AVPR1A,BVES,CACNA1B,CACNA1C,CACNA1E,CACNA1F,CACNA1G,CACNA1H,CACNA2D1,CACNA2D2,CACNA2D4,CACNB1,CACNB2,CACNB3,CACNG1,CACNG3,CACNG4,CALCA,CALM1,CALM2,CAMK2D,CAV3,CHRM2,CHRNA7,CORIN,CRHR2,CTNNA3,CYP2J2,DES,DMD,DMPK,DNM1L,DRD2,DSP,EDN3,FGF12,FKBP1B,FOXN4,FXYD3,FXYD4,GAA,GATA4,GJA5,GJC1,GLRX3,GNAI2,G…			GO: Biological Process	GO:0044419	interspecies interaction between organisms	10	ABCE1,ABI1,ACE2,ACY3,AMBP,AP1M1,APCS,APOA2,APOBEC3A,APOBEC3B,APOBEC3C,APOBEC3D,ATF7,ATF7IP,ATG5,ATG7,ATP6V0C,BANF1,BAX,BCL2L11,BNIP3,BNIP3L,BPIFA1,BRD4,BST2,BUB1,C19orf66,C1QBP,CAMLG,CCDC86,CCL1,CCL2,CCL3,CCL5,CCNT1,CD209,CD247,CD28,CD81,CD93,CDHR3,CDK13,CFL1,CFLAR,CHMP1A,CHMP2B,CHMP4A,CHMP4C,CHMP6,CHMP7,CLDN1,CLDN6,CLDN9,CLEC5A,COPB1,COPS6,CREB1,CREB3,CRTC2,CTBP2,CTDP1,CTSB,CTSG,CUL1,CUL2,CUL7,C…			GO: Biological Process	GO:0060341	regulation of cellular localization	5.79359	AACS,ABCC8,ABR,ACSL3,ACSM6,ACTN2,ADCYAP1,ADIPOQ,ADORA1,ADORA2A,ADORA2B,ADORA3,AGT,AIM2,AKAP1,AKAP5,AKAP8L,AKT1,ANK3,ANXA1,ANXA13,ANXA5,APC,APLN,APOA2,APPL1,AR,ARF1,ARHGEF16,ARL2BP,ARNTL,ASPH,ATG13,ATG7,ATP1A2,AXIN1,B3GAT3,B4GALT1,BAK1,BAMBI,BARD1,BAX,BBC3,BCAP31,BCL2,BCL2L1,BCL2L11,BET1L,BID,BIRC5,BLK,BMPR1A,BNIP3L,BRSK2,BTN1A1,C1QTNF3,C2CD2L,C2CD5,C5AR2,CACNA1D,CACNA1E,CACNA2D2,CADPS,CALM1,CAMK2…			GO: Biological Process	GO:1901701	cellular response to oxygen-containing compound	10	AACS,ABCA1,ABCG2,ACACA,ACTN2,ADAMTS1,ADCY1,ADCY8,ADCY9,ADD1,ADIPOQ,ADPRHL2,ADRM1,AGTR2,AGTRAP,AHSG,AIFM1,AKAP6,AKAP8,AKR1C2,AKT2,AKT3,ALDH1A2,ALDOB,ANO1,AOC1,AP3S1,APLP1,APOB,APOBEC1,AQP2,AQP4,AQP8,AQP9,ARG1,ASS1,ATG7,ATP6AP1,ATP6V0A1,ATP6V0A4,ATP6V0B,ATP6V0C,ATP6V0D1,ATP6V0E1,ATP6V1B2,ATP6V1C1,ATP6V1C2,ATP6V1E1,ATP6V1F,ATP6V1H,BAIAP2,BAIAP2L1,BCAR1,BGLAP,BIRC5,BMP4,BMP7,BRINP2,BRSK2,BTK,C2CD2L,C…			GO: Biological Process
GO: Biological Process	GO:0045664	regulation of neuron differentiation	10	ACTR3,ADCYAP1,AKAP5,ANKRD27,APP,ARHGAP4,ARHGEF1,ATF1,ATP8A2,AVIL,BAIAP2,BCL11B,BDNF,BMP2,BMP5,CCL5,CDC20,CDH2,CHN1,CHRNA3,CIT,CNR1,CNTN2,CSPG4,CUL7,CUX1,DBN1,DCC,DDX6,DGUOK,DISC1,DKK1,DPYSL2,DSCAM,EDNRB,EFNA3,EIF2B2,EOMES,EPOR,ETV5,FEZ1,FGF13,FIG4,FKBP1B,FMOD,FOXO3,FYN,GDI1,GLI2,GPRC5B,GRIN1,GSK3B,HEY1,HEYL,HLA-A,HNRNPK,IL1B,IL1RAP,IL1RAPL1,IL6,IMPACT,ISL2,ITGA3,ITM2C,KANK1,KDM4A,KIAA0319,KIF3C,K…			Category	ID	Title (or Source)	Cluster 3_logP	Cluster 3_GeneSet			GO: Biological Process	GO:0045892	negative regulation of transcription, DNA-templated	10	AIM2,ARID1A,ATAD2B,ATF3,BASP1,BAZ2A,BCL3,BHLHE40,BIRC5,BTG2,CAV1,CBFA2T2,CBX5,CDKN1C,CHD8,CLOCK,CREBRF,CRY1,CXXC5,CYLD,CYP1B1,DAB2,DDIT3,DICER1,DNMT3B,E2F7,EFNA1,EHMT1,ELF3,ENO1,EP300,ERBIN,EZR,FLNA,FOXF2,FOXN3,FOXP1,FOXP4,FZD6,HDGF,HES1,HIC2,HIPK2,HMGA2,HMGB2,HNRNPA2B1,HSPA8,IKZF4,IRAK1,IRF8,JARID2,JAZF1,JDP2,KANK2,KDM1A,KDM5B,KLF4,KLF5,LEF1,LHX1,LIMS1,LMCD1,LOXL2,LRRFIP1,MDM4,MECP2,MEF2A,MORF4L…			GO: Biological Process	GO:0044057	regulation of system process	10	ABAT,ABCG5,ACE,ACE2,ACVR2A,ADIPOQ,ADK,ADORA1,ADORA2B,ADRA1B,AGT,AGTR1,AHCYL1,AKAP1,AKAP6,AKAP9,AKT1,ALOX12,ALOX5,ANPEP,APLN,APOA2,AQP1,ASPH,ATP1B2,ATP1B3,ATP2A1,ATP2B1,ATP2B3,ATP2B4,AVPR1A,AVPR1B,AVPR2,BMPR2,BVES,C1QTNF3,CACNA1B,CACNA1C,CACNA1E,CACNA1F,CACNA1G,CACNA1H,CACNA2D1,CACNA2D2,CACNA2D4,CACNB1,CACNB2,CACNB3,CACNG1,CACNG3,CACNG4,CALCA,CALCRL,CALM1,CALM2,CAMK2D,CASR,CAV3,CCK,CCL3,CCN3,CCN4,…			GO: Biological Process	GO:0046128	purine ribonucleoside metabolic process	10	ACACA,ACACB,ACOT7,ACPP,ADK,ADSSL1,AHCY,AHCYL1,AK1,AK5,ALDOC,APRT,ATP1A2,ATP1B1,ATP5F1A,ATP5F1C,ATP5F1D,ATP5MC1,ATP5MC2,ATP5MF,ATP5MG,ATP5PB,ATP5PD,ATP5PF,ATP5PO,ATP6V0A2,ATP6V0A4,ATP6V1A,ATP6V1B2,BPGM,CARD11,COX15,COX4I1,COX5A,COX5B,COX6B1,COX7A2L,COX7C,COX8A,CTNS,CYC1,DCAKD,DGUOK,DLG1,DLG3,DLG4,DNAJC15,DNMT3B,EIF6,ENO1,ENO3,ENTPD5,FBP1,FXN,GADD45GIP1,GALE,GALT,GAMT,GCK,GPHN,GPI,HIF1A,HK1,HK2,HSP…			GO: Biological Process	GO:0009150	purine ribonucleotide metabolic process	5.77285	ABCA1,ACOT7,ACR,ADCY10,ADCY7,ADCY9,ADCYAP1,ADM,ADNP,ADORA2A,ADORA2B,ADSL,ADSS,AK2,AK3,AK4,AK9,AKAP5,ALDOA,ALDOB,AMPD1,AMPD2,ATP1A2,ATP2B2,ATP5F1B,ATP5F1C,ATP5MC1,ATP5MF,ATP5MG,ATP5PB,ATP5PD,ATP5PF,ATP6V0A2,ATP6V0A4,BDNF,CALM1,CAP2,CASK,CEP290,CHGA,COX10,COX4I1,COX5B,COX6B1,COX7A2L,COX7C,COX8A,CRH,CRHR1,CRHR2,CXCL10,CXCL11,CXCR3,CYCS,DCAKD,DLD,DLG1,DLG2,DLG3,DLG4,DMAC2L,DNAJC15,DNM1L,DRD3,DRD4,ECD…			GO: Biological Process	GO:0040007	growth	10	ACTL6A,ACVR1B,ACVRL1,ADAM10,ADAM15,ADAM17,ADD1,ADIPOR2,ADRA1A,ADRA1B,ADRB3,AES,AGR2,AGTR2,AHSG,AKAP6,ALCAM,ALOX12,ALPI,ANAPC2,ANKRD11,APBA1,APBA2,APBB1,APBB2,APOD,APOE,AR,ARHGEF11,ARIH2,ARX,ASPM,ATF5,ATP6V0E1,ATXN2,AZGP1,BASP1,BBC3,BCAR1,BCL11A,BDKRB1,BMP2,BMP4,BMP5,BMP7,BMPR1A,BMPR1B,BNC2,BRAT1,BRCA2,BTG1,CACNA1A,CACNA1C,CADM1,CAMK2D,CAMP,CAPN3,CCL11,CCM2,CCNB2,CD320,CD81,CDC42,CDH4,CDHR2,CDK11A…			GO: Biological Process
GO: Biological Process	GO:0032989	cellular component morphogenesis	10	ABCC4,ACTB,ACTN2,ACTR3,ADAM15,ADAM8,AKAP5,AKIP1,ALCAM,ANKRD27,ANXA1,APP,ARAP3,ARHGAP15,ARHGAP4,ARHGEF1,ARPC2,ATG7,ATL1,ATP8A2,AVIL,AXIN2,BAIAP2,BBOF1,BBS9,BCL11B,BCL9L,BDNF,BMP2,BMP5,C5orf30,CADM1,CAPZB,CASP3,CASP9,CASQ2,CC2D2A,CCDC113,CCK,CCKAR,CCL2,CD9,CDC42EP1,CDC42EP4,CDC42SE2,CDH11,CDH2,CELSR2,CEP41,CHN1,CHRNA3,CIT,CITED1,CLIC4,CLIC5,CLUAP1,CNTN2,CORO1A,CORO1B,CRYGB,CUL7,CUX1,CYFIP1,DBN1,DCC…			GO: Biological Process	GO:0051241	negative regulation of multicellular organismal process	10	ABAT,ABCG5,ABCG8,ACP5,ACVRL1,ADAMTS1,ADAMTS7,ADGRB1,ADGRB2,ADGRB3,ADORA2B,ADRA1D,ADRB3,AHSG,AKAP1,AKAP8,ALMS1,ALOX12,AMH,AMOT,ANGPT1,ANGPT2,ANGPT4,ANXA1,ANXA4,ANXA5,APBB1,APOA2,APOC2,APOD,APOE,APP,AQP4,ARF6,ARHGAP4,ARHGDIB,ARHGEF1,ARHGEF2,ARRB2,ASB1,ASCL1,ASPM,ASPN,ATG9A,ATP1A1,ATP2A1,ATP2B4,AVPR2,AXIN2,AXL,BAG5,BANK1,BCL2,BCL6,BCOR,BCR,BMP7,BPI,BRINP1,BST2,BTN1A1,C16orf45,C1QC,C1QTNF1,C5orf30,CA…			GO: Biological Process	GO:0035966	response to topologically incorrect protein	10	AARS,ACADVL,ASNS,ATF3,ATF4,ATF6,ATXN3,BBC3,BCL2L11,CREB3,CREB3L2,CREBRF,DDIT3,DNAJB1,DNAJB9,DNAJC3,EDEM2,EIF2AK2,EP300,ERP44,HDGF,HERPUD1,HSP90AB1,HSP90B1,HSPA8,HYOU1,IGFBP1,LMNA,MFN2,PARP16,PDIA5,SEC31A,SHC1,TLN1,XBP1			GO: Biological Process	GO:0034504	protein localization to nucleus	10	ABCA7,ADAR,AGT,AKAP1,AKAP6,AKT1,APOD,ARL2,ARL2BP,AXIN2,BCL3,BMP4,BMP7,C1QTNF3,CABP1,CALR,CBLB,CCDC22,CCL19,CCN3,CCT2,CCT3,CCT4,CCT6A,CCT7,CCT8,CD27,CDK1,CDK5RAP3,CDKN1A,CEP57,CFL1,CHERP,CIZ1,CLDN18,COL1A1,CRY2,CSE1L,CSF3,CTDNEP1,CYLD,DAB2IP,DACT1,DMAP1,DNAJB6,DRD1,ECT2,EDA,EGF,EGFR,EMD,ERBB4,FAF1,FAM89B,FBXO4,FGF9,FLNA,FYB1,GDF5,GSK3B,HCLS1,HDAC3,HDGF,HES1,HHEX,HIKESHI,HNF4A,HNRNPM,HSP90AB1,HSPA8…			GO: Biological Process	GO:0007169	transmembrane receptor protein tyrosine kinase signaling pathway	10	ABI1,ABL1,ACTB,ACTG1,ACTR3,ADAM10,ADIPOQ,ADRM1,AFAP1L2,AHI1,AKT1,ANGPT1,ANGPT2,ANGPT4,ANKRD26,ANKS1A,AP2A1,AP2A2,AP2M1,AP2S1,AP3S1,APH1A,APLP2,ARAP1,ARF4,ARHGEF7,ARPC1B,ARPC2,ARPC4,ARPC5,ATP6AP1,ATP6V0A2,ATP6V0A4,ATP6V0B,ATP6V0C,ATP6V0D1,ATP6V1A,ATP6V1B2,ATP6V1F,BAIAP2,BCAR1,BLK,BMP5,BMX,BRK1,CAMLG,CCL13,CCL2,CCN2,CD3E,CD7,CD8B,CDC37,CDC42,CDH13,CHRNA3,CILP,CNKSR1,CNMD,COL4A2,COL4A6,CPNE3,CRIM1,C…			GO: Biological Process	GO:0033365	protein localization to organelle	5.7172	ABCA7,ACAP2,ACD,ACSM6,AGT,AKAP1,AKAP5,AKT1,AP3M1,ARF4,ARL2BP,ARNTL,ATG13,ATP6V1D,ATR,AURKA,AXIN1,BAMBI,BANP,BAX,BBC3,BBS1,BBS2,BBS9,BCAP31,BCL2,BCL2L11,BID,BMPR1A,BNIP3L,BRCA2,BUB1B,C1QTNF3,CASP8,CAV2,CBLB,CCDC22,CCL19,CCT2,CCT4,CCT6A,CCT8,CD27,CD81,CDCA5,CDKN2A,CEP131,CEP63,CEP83,CHCHD4,CHERP,CHP1,CHP2,CIZ1,CLDN18,COG3,COG7,COX18,CPLANE1,CROCC,CRY2,CSNK1D,CTDNEP1,CYB5R1,DACT3,DAG1,DHX9,DISC1,DKC…			GO: Biological Process	GO:0072503	cellular divalent inorganic cation homeostasis	10	ADCYAP1R1,ADRA1A,ADRA1B,ADRA1D,AKAP5,AKAP6,ANXA7,APOE,ASPH,ATP13A1,ATP13A2,ATP13A4,ATP2A1,ATP2A2,ATP2A3,ATP2B3,ATP2C1,ATP2C2,AVPR1B,BBC3,BCAP31,BDKRB1,BDKRB2,BMP4,C1QTNF1,CACNA1A,CACNA1C,CACNA1F,CACNA1I,CACNA2D1,CACNB3,CALCA,CALCR,CALM3,CAMK2D,CAPN3,CASQ1,CASQ2,CCKBR,CCL1,CCL11,CCL19,CCL2,CCL21,CCL23,CCL28,CCL3,CCL5,CCL7,CCL8,CCR10,CCR4,CCR7,CCR9,CD19,CD4,CD40,CD52,CD55,CEMIP,CHRNA10,CHRNA7,CIB2,…			GO: Biological Process
GO: Biological Process	GO:0051962	positive regulation of nervous system development	10	ACTR3,ADCYAP1,ADGRL3,AKAP5,AMIGO2,ANKRD27,ASIC2,ATF1,ATP8A2,AVIL,BAIAP2,BDNF,BMP2,BMP5,CBLN1,CCL5,CDC20,CLSTN2,CNR1,CUL7,CUX1,CX3CL1,DBN1,DCC,DISC1,DKK1,DSCAM,EGF,EIF2B2,ENPP2,EPOR,ETV5,FEZ1,FIG4,FKBP1B,FLRT1,FLRT3,FYN,FZD3,GLI1,GLI2,GPER1,GPRC5B,GSK3B,HEYL,HNRNPK,IL1B,IL1RAP,IL1RAPL1,IL6,IMPACT,ITGA3,KDM4A,KIF3C,L1CAM,LIF,LIG4,LPAR1,LRRC7,LRRN1,LRTM1,MAG,MAP1B,MAP2K2,MAPK6,MARCKS,MEF2C,MEGF8,NEU…			GO: Biological Process	GO:0009967	positive regulation of signal transduction	10	AAK1,ABAT,ABCA7,ABL1,ABRA,ACVR1B,ACVR2A,ACVRL1,ADAM8,ADAM9,ADAMTS20,ADAMTS3,ADORA2B,ADRA1B,ADRB3,ADRM1,AGPAT2,AGR2,AJUBA,ALK,ALOX12B,ALOX15B,ALS2,ANGPT1,ANKRD17,ANKRD6,APAF1,APOL3,ARFGEF1,ARHGAP1,ARHGAP4,ARHGEF5,ARL6IP5,ARNTL,ARPP19,ARRB2,ASCL1,ASPH,ASPM,ATP6AP1,ATP6AP2,ATP6V0C,AXIN2,AXL,BAG4,BANK1,BCAP31,BCL2,BCL2L11,BCL2L14,BCLAF1,BID,BIRC7,BMF,BMP1,BMP15,BMP6,BMP7,BNIP3,BRAF,BRD4,BST2,BUB1,BUD…			GO: Biological Process	GO:0007167	enzyme linked receptor protein signaling pathway	10	ACTB,ACTG1,ACVR1C,ADAM17,ADGRA2,AP2M1,AP3S1,ARPC5,ATP6V0A2,ATP6V1B1,ATP6V1C2,BTK,CAV1,CAV2,CDH3,CDKN1C,CHRDL1,CHRDL2,CNKSR1,COL4A1,CRIM1,CSK,CSPG4,DAB2,DCN,DOK5,DSTYK,EFNA1,EFNB2,ENPP1,EPHA7,EPHB4,ERBB3,ERBIN,FBN1,FBN2,FGF18,FGF23,FOS,FSTL1,FSTL3,GATA4,GFRA2,GLG1,GRB10,HES1,HIPK2,HNRNPM,HTRA1,IGF2R,IGFBP1,INHBA,IRAK1,JAK1,KDR,LEF1,LRP1,MTMR4,MYO1E,MYOCD,MYOF,NCBP2,NCF2,NCSTN,NEDD4,NEO1,NGFR,NOTCH…			GO: Biological Process	GO:0001101	response to acid chemical	10	AACS,AANAT,AARS,ABCA1,ABCB4,ABCC2,ACACA,ACP5,ADD1,ADIPOQ,AIFM1,AKR1C1,AKR1C2,AKT1,ALAD,ALDH1A2,APOB,AQP1,AQP2,ARG1,ASCL1,ASNS,ASS1,ATP2B4,AVPR1A,BCL2L1,BDNF,BMP4,CASP3,CASTOR1,CAT,CBS,CCL19,CCL21,CCL5,CD38,CDO1,CFL1,CHUK,COL16A1,COL18A1,COL1A1,COL1A2,COL3A1,COL6A1,CREB1,CYBA,CYP26B1,DHFR,DNMT3A,DRD1,E2F1,EEF2,EGFR,ENO1,FABP3,FGFR4,FN1,FOLR2,GATA4,GIP,GIPR,GNAS,GNB1,GNG2,GNPAT,GNRH1,GRIN2A,GSK3B,G…			GO: Biological Process	GO:0019693	ribose phosphate metabolic process	10	ACACA,ACACB,ACOT7,ACR,ADCY10,ADCY8,ADCY9,ADK,ADORA2A,ADSSL1,AK1,AK5,AKAP5,ALDOC,AMPD1,APLP1,APRT,ATIC,ATP1A2,ATP1B1,ATP2B2,ATP5F1A,ATP5F1C,ATP5F1D,ATP5MC1,ATP5MC2,ATP5MF,ATP5MG,ATP5PB,ATP5PD,ATP5PF,ATP5PO,ATP6V0A2,ATP6V0A4,ATP6V1A,ATP6V1B2,BPGM,CAD,CALCA,CALM3,CAP1,CARD11,CBS,CEP290,CMPK1,COX15,COX4I1,COX5A,COX5B,COX6B1,COX7A2L,COX7C,COX8A,CRH,CRHR1,CTNS,CXCL9,CXCR3,CYC1,DCAKD,DERA,DLG1,DLG3,DLG4…			GO: Biological Process	GO:0032386	regulation of intracellular transport	5.68148	ACSL3,ACSM6,ACTN2,ADIPOQ,ADORA2B,ADORA3,AKAP1,AKAP5,AKAP8L,ANK3,ANXA13,ARF1,ASPH,ATG13,ATP1A2,AXIN1,B3GAT3,BAK1,BAMBI,BARD1,BAX,BBC3,BCAP31,BCL2,BCL2L11,BET1L,BID,BMPR1A,BNIP3L,BRSK2,C1QTNF3,C2CD5,CALM1,CAMK2D,CAMK4,CAPN3,CASP8,CASQ1,CASQ2,CAV1,CCDC22,CCL13,CCL19,CD27,CDC42,CDK5,CDK5R1,CDKN2A,CEP131,CEP290,CHCHD4,CHERP,CHP1,CHP2,CLIC2,CNIH2,CORO1A,CREBRF,CRHR1,CRYAA,CRYAB,CSK,CXCL10,CXCL11,CXCR3,…			GO: Biological Process	GO:0055085	transmembrane transport	10	ABCA1,ABCA12,ABCA4,ABCA5,ABCA6,ABCA7,ABCA9,ABCB10,ABCB6,ABCB7,ABCB8,ABCC1,ABCC10,ABCC2,ABCC4,ABCD1,ABCD2,ABCD3,ABCD4,ABCG1,ABCG2,ABCG4,ABCG5,ACACA,ACSL6,ACTN2,ACTN4,ADD1,ADD2,AHNAK,AKAP6,AKT2,ANK3,ANO1,APOA2,AQP10,AQP2,AQP3,AQP4,AQP6,AQP8,AQP9,ARF1,ARHGEF9,ASIC2,ASIC3,ASPH,ATOX1,ATP11C,ATP12A,ATP13A1,ATP13A2,ATP13A4,ATP1B2,ATP2A1,ATP2A2,ATP2A3,ATP2B3,ATP2C1,ATP2C2,ATP4A,ATP4B,ATP5F1A,ATP5F1B,ATP5…			GO: Biological Process
GO: Biological Process	GO:0060560	developmental growth involved in morphogenesis	5.96008	ALCAM,APP,ARHGAP4,BDNF,CADM1,CYFIP1,DBN1,DCC,DCLK1,DISC1,DPYSL2,DSCAM,EIF2B2,ESR1,FGF1,FGF13,FLRT1,FLRT3,FMOD,GSK3B,HDAC6,HNRNPK,IMPACT,KDM5B,KIF26B,L1CAM,MAP1B,MED12,MEGF8,MGLL,MST1,MT3,NIN,NRG1,NTRK3,PLXNA2,PLXNB1,POSTN,PPP2R3A,PRKCZ,PRKN,PTK7,RAB11A,RASAL1,RIMS1,ROBO1,RTN4R,SALL1,SEMA3G,SEMA4F,SEMA4G,SEMA6D,SEMA7A,SFRP2,SHH,SLC12A2,SLC9A6,SPP1,SYT17,TBX2,TFAP2C,TNC,TRPC5,TRPV2,UNC13A,VCL			GO: Biological Process	GO:0000165	MAPK cascade	10	ABCA7,ABL1,ACE2,ADAM8,ADAM9,ADORA2B,ADRA1B,ADRB3,AJUBA,ALK,ALOX12B,AMBP,ANGPT1,ANKRD6,APIP,APOE,ARHGEF5,ARHGEF6,ARL6IP5,ARRB2,ASH1L,ATP6AP1,ATP6AP2,BANK1,BIRC7,BMP1,BMP15,BMP6,BMP7,BRAF,BRAP,C1QTNF1,C3,C3orf33,C5,CALM1,CALM2,CAMK2A,CARD9,CAV2,CAV3,CAVIN3,CBLC,CBS,CCL1,CCL11,CCL16,CCL17,CCL18,CCL19,CCL2,CCL22,CCL24,CCL3,CCL4,CCL7,CCL8,CCM2,CCN2,CCR3,CD27,CD40,CD44,CD74,CD81,CD84,CDC42,CDC42EP5,CDC…			GO: Biological Process	GO:0009611	response to wounding	10	ACTB,ACTG1,ACTN1,ADAM17,ADAMTS18,ADCYAP1,AK3,AP3B1,ARFGEF1,BRD4,BTK,C1GALT1C1,C5orf30,CAPZA1,CAV1,CBX5,CCL24,CCL5,CCM2L,CD34,CD47,CD59,CDH3,CELSR1,CERS2,CLOCK,CNN2,COL5A1,CTNNA1,DCN,DICER1,DOCK8,DOCK9,DSP,DUSP10,EHD1,ERBB3,F2,F9,FAP,FLNA,FOXP1,FZD6,GATA4,GNA14,HPS5,IGFBP1,IL1A,IL20RB,IL6,ITPR1,ITPR2,ITPR3,KDM1A,KLF4,KRT6B,LBH,LCP1,LMAN1,LNPK,LOX,LYST,MDK,MFN2,MMP26,MTR,MYH9,MYOF,NDNF,NFKB1,NGFR,N…			GO: Biological Process	GO:0060284	regulation of cell development	10	ACE,ACSL6,ACTR3,ADGRB3,ADGRG1,ADIPOQ,ADNP,AKAP6,AKT1,ANAPC2,ANKRD23,AP1AR,APBB1,ARF1,ARF6,ARHGEF2,ARSB,ASAP1,ASCL1,ASPA,ASPM,ATG7,ATP6AP1,AVIL,AXIN2,BAX,BCL11A,BCL11B,BCL9L,BDNF,BIN1,BMP4,BMP7,BMPR2,BNIP2,BRAF,C1QBP,CALR,CAMK1D,CAPRIN1,CAPRIN2,CARM1,CARMIL1,CASZ1,CAV3,CCDC88A,CCL5,CCN4,CDH2,CDH4,CDK1,CDK5RAP1,CDK5RAP2,CDK5RAP3,CDKL3,CDKL5,CDON,CFL1,CHODL,CHRNA3,CHRNB2,CIT,CITED1,CLCF1,CLDN18,CLDN…			GO: Biological Process	GO:0002684	positive regulation of immune system process	10	ABCB1,ABI1,ABL1,ACIN1,ACTB,ACTG1,ACTR3,ACVR1B,ACVR2A,ADAM10,ADAM8,ADK,AKT1,ANXA1,AP3B1,AQP3,ARPC1B,ARPC2,ARPC4,ARPC5,ATP6AP1,BAIAP2,BAX,BCAR1,BCL2A1,BDKRB1,BLK,BRK1,BTN3A1,C1QA,C1QB,C1QBP,C1QC,C1RL,C1S,C4BPB,C5,C5AR2,C7,C8G,CA2,CACNB3,CADM1,CALCA,CALR,CARD11,CARD9,CBLB,CCDC88B,CCL13,CCL19,CCL2,CCL20,CCL21,CCL24,CCL3,CCL5,CCL8,CCR1,CCR6,CD14,CD2,CD209,CD247,CD27,CD274,CD276,CD28,CD300LB,CD38,CD3E,…			GO: Biological Process	GO:0019693	ribose phosphate metabolic process	5.65685	ABCA1,ACOT7,ACR,ADCY10,ADCY7,ADCY9,ADCYAP1,ADM,ADNP,ADORA2A,ADORA2B,ADSL,ADSS,AK2,AK3,AK4,AK9,AKAP5,ALDOA,ALDOB,AMPD1,AMPD2,ATP1A2,ATP2B2,ATP5F1B,ATP5F1C,ATP5MC1,ATP5MF,ATP5MG,ATP5PB,ATP5PD,ATP5PF,ATP6V0A2,ATP6V0A4,BDNF,CALM1,CAP2,CASK,CEP290,CHGA,COX10,COX4I1,COX5B,COX6B1,COX7A2L,COX7C,COX8A,CRH,CRHR1,CRHR2,CTPS1,CXCL10,CXCL11,CXCR3,CYCS,DCAKD,DERA,DLD,DLG1,DLG2,DLG3,DLG4,DMAC2L,DNAJC15,DNM1L,DR…			GO: Biological Process	GO:0072358	cardiovascular system development	10	AAMP,ACTA2,ACTN2,ACVR1,ACVRL1,ADAM15,ADAM19,ADAMTS1,ADD1,ADGRB1,ADGRB2,ADIPOR2,ADM2,ADORA2B,ADRA1A,ADRA1B,AGTR2,AKAP6,ALDH1A2,ALOX12,AMOT,ANG,ANGPT4,ANKS6,ANPEP,ANXA3,APOB,APOD,APOE,APOH,ARHGAP24,ARHGEF15,ARMC4,ASB4,ATF2,ATG7,ATP5F1B,ATP5IF1,AXIN2,B4GALT1,B9D1,BASP1,BCAS3,BMP2,BMP4,BMP7,BMPR1A,BTG1,C5,CACNA1C,CALCA,CAMK2D,CAMP,CASP8,CBY1,CC2D2A,CCBE1,CCDC39,CCDC40,CCL11,CCL2,CCL24,CCL5,CCM2,CDC42…			GO: Biological Process
GO: Biological Process	GO:0010976	positive regulation of neuron projection development	5.9587	ACTR3,ADCYAP1,AKAP5,ANKRD27,ATF1,ATP8A2,AVIL,BAIAP2,BDNF,BMP5,CNR1,CUL7,CUX1,DBN1,DCC,DISC1,DSCAM,EIF2B2,EPOR,FEZ1,FIG4,FKBP1B,FYN,GPRC5B,GSK3B,HNRNPK,IL1RAP,IL1RAPL1,IL6,ITGA3,KIF3C,L1CAM,LIF,LPAR1,LRRC7,MAP1B,MAP2K2,MAPK6,MARCKS,MEGF8,NIN,NPTN,NRG1,NTRK2,NTRK3,NUMBL,PALM,PLXNB1,PPP1R9A,PPP2R5B,PRKN,PSEN1,PTK7,PTPRD,PTPRF,RAB11A,RANBP1,RAPGEF1,RASAL1,RIMS1,ROBO1,SCARF1,SEMA7A,SETX,SEZ6,SGK1,SNX3…			GO: Biological Process	GO:0009628	response to abiotic stimulus	10	AAAS,ABAT,ABCA4,ABCG5,ABHD12,ABRAXAS1,ABRAXAS2,ACADM,ACER1,ACOT11,ACOT2,ACTB,ACTR5,ADAM8,ADIRF,ADRA1B,ADRB3,AEN,AHCY,AIFM1,AIPL1,AJUBA,AKT1S1,ALAD,ALAS2,ALKBH5,ANG,ANGPT2,ANGPT4,ANKRD23,ANO1,ANO3,ANXA1,ANXA7,APAF1,APBB1,APP,AQP2,AQP9,ARHGEF2,ARNT2,ARRB2,ARSA,ASCL1,ASIC2,ASIC3,ASNS,ATP1A1,ATP1B1,ATP2B2,ATP2B4,ATP8A2,B4GALT2,BABAM1,BACH1,BAG2,BAG3,BAG4,BAG5,BCL2,BDKRB2,BGLAP,BMP6,BMP7,BNIP3,BRAF,BR…			GO: Biological Process	GO:0019080	viral gene expression	10	CCL5,CCNT1,EIF3B,EIF3D,EP300,HMGA2,IFITM3,LEF1,NOTCH1,NUP205,NUP210,NUP214,NUP54,NUP58,POLR2A,PTBP1,RPL13,RPL19,RPL23,RPL27,RPL27A,RPL3,RPL30,RPL31,RPL32,RPL37,RPL9,RPLP1,RPS12,RPS14,RPS19,RPS26,RPS6,RPS7,SMARCA4,TARDBP,TPR			GO: Biological Process	GO:0050852	T cell receptor signaling pathway	10	BCL10,BCL2A1,BTN3A1,BTRC,CACNA1F,CACNB3,CBLB,CD28,CD3D,CD3E,CD3G,CHUK,CUL1,CYLD,ELF1,FYB1,HLA-DQB1,IFNG,IKBKG,KCNN4,LAT,MALT1,MAP3K7,NFKBIA,PAG1,PAK1,PAK2,PAK3,PAWR,PDE4D,PHPT1,PIK3CD,PIK3R2,PLCG1,PLCG2,PRKCQ,PRKD2,PSEN2,PSMA1,PSMA2,PSMA3,PSMA4,PSMA5,PSMA6,PSMA7,PSMB1,PSMB10,PSMB2,PSMB3,PSMB4,PSMB5,PSMB6,PSMB7,PSMC2,PSMC3,PSMC4,PSMC5,PSMC6,PSMD10,PSMD11,PSMD12,PSMD13,PSMD14,PSMD2,PSMD3,PSMD6,PSMD…			GO: Biological Process	GO:1901657	glycosyl compound metabolic process	10	ACACA,ACACB,ACOT7,ACPP,ADK,ADSSL1,AHCY,AHCYL1,AK1,AK5,AKR1B10,ALDOC,APOBEC3A,APOBEC3C,APRT,ATIC,ATP1A2,ATP1B1,ATP5F1A,ATP5F1C,ATP5F1D,ATP5MC1,ATP5MC2,ATP5MF,ATP5MG,ATP5PB,ATP5PD,ATP5PF,ATP5PO,ATP6V0A2,ATP6V0A4,ATP6V1A,ATP6V1B2,BPGM,CAD,CARD11,CBR4,CDA,CMPK1,COX15,COX4I1,COX5A,COX5B,COX6B1,COX7A2L,COX7C,COX8A,CTNS,CYC1,DCAKD,DCTD,DERA,DGUOK,DLG1,DLG3,DLG4,DNAJC15,DNMT3B,DNPH1,DPYD,EIF6,ENO1,ENO3,E…			GO: Biological Process	GO:0019637	organophosphate metabolic process	5.65527	ABCA1,ABHD4,ABHD5,ACOT7,ACP6,ACR,ACSL3,ACSL6,ADCY10,ADCY7,ADCY9,ADCYAP1,ADGRF5,ADM,ADNP,ADORA2A,ADORA2B,ADSL,ADSS,AFMID,AGPAT4,AGPAT5,AK2,AK3,AK4,AK9,AKAP5,ALDH5A1,ALDOA,ALDOB,AMPD1,AMPD2,ANGPTL3,APOA2,APOC2,ARF1,ARF3,ASPG,ATG14,ATP1A2,ATP2B2,ATP5F1B,ATP5F1C,ATP5MC1,ATP5MF,ATP5MG,ATP5PB,ATP5PD,ATP5PF,ATP6V0A2,ATP6V0A4,BDNF,BTC,CALM1,CANT1,CAP2,CASK,CAT,CCL19,CCL21,CD244,CD81,CDC42,CDIPT,CEP290,CH…			GO: Biological Process	GO:0030001	metal ion transport	10	ACTN2,ACTN4,ADCYAP1R1,ADRA1A,AHNAK,AKAP5,AKAP6,AKT2,AKT3,ANK3,AQP2,ARF1,ASIC2,ASIC3,ASPH,ATF4,ATOX1,ATP12A,ATP13A1,ATP1B2,ATP1B4,ATP2A1,ATP2A2,ATP2A3,ATP2B3,ATP2C1,ATP2C2,ATP4A,ATP4B,ATP6AP1,ATP6V0A1,ATP6V0A4,ATP6V0B,ATP6V0C,ATP6V0D1,ATP6V0E1,ATP6V1B2,ATP6V1C1,ATP6V1C2,ATP6V1E1,ATP6V1F,ATP6V1H,BBC3,BDKRB1,BEST1,BMP4,BPIFA1,CACFD1,CACNA1A,CACNA1C,CACNA1F,CACNA1H,CACNA1I,CACNA1S,CACNA2D1,CACNB1,CAC…			GO: Biological Process
GO: Biological Process	GO:0008285	negative regulation of cell proliferation	5.84708	ADCYAP1,ADORA1,APOD,ATF2,ATP8A2,AXIN2,AZGP1,B4GALT1,BCL11B,BDNF,BMP2,BMP5,BNIPL,BRIP1,BTG1,CASK,CASP3,CAV2,CBFA2T3,CCL2,CCL23,CD44,CD9,CDH13,CDH5,CGREF1,CGRRF1,CNOT7,COMT,COPS8,CTBP2,CTSV,CXCL8,CYP27B1,DLG3,DLG5,DLL4,E2F3,EAF2,EFNB2,EIF2AK1,ERBB2,ERBB4,ESR1,ETS1,ETV4,FABP6,FAP,FBLN1,FBXW7,FGFBP1,FLT3,FOXA3,FRK,GAS8,GML,GNRHR,GPER1,GPNMB,GREM1,GSDME,HMGA1,HNF4A,IFIT3,IFT88,IGFBP6,IGFBP7,IL12A,IL1B…			GO: Biological Process	GO:0051130	positive regulation of cellular component organization	10	ABCA7,ABI2,ACD,ACE2,ACHE,ACSL3,ACSL6,ACTL6A,ACTR2,ACTR3B,ADAM9,ADAMTS1,ADGRB1,ADGRB2,ADGRB3,ADGRL2,ADNP,AGR2,AHSG,AJUBA,AKAP8,AKAP8L,AMOT,ANAPC2,ANGPT1,ANK1,ANKFY1,ANXA1,APBB1,APOA5,APOC2,APOE,ARF6,ARFIP1,ARFIP2,ARHGEF5,ARHGEF7,ARL2,ARPC1B,ARPC2,ARPC4,ARPC5L,ARRB2,ASIC2,ATAD1,ATF1,ATP8A2,AURKA,AUTS2,AVIL,AXIN2,AXL,AZU1,BAG4,BAIAP2,BAIAP2L1,BAIAP2L2,BCAS3,BCL2,BCL2L11,BCL6,BCL9L,BCLAF1,BCR,BID,BIN…			GO: Biological Process	GO:0010608	posttranscriptional regulation of gene expression	10	AARS,ADAR,AGO1,ATF4,BCL3,BTG2,CAV1,CCL5,CPEB2,CYP1B1,DAPK1,DDX25,DICER1,DNAJC3,EEF2,EIF2AK2,EIF3B,EIF3D,EIF3H,EIF3I,EIF4A1,EIF4E3,EIF4G1,EIF4G3,ELAVL1,ELAVL4,EP300,FAM129A,FMR1,FXR1,GAPDH,HNRNPA2B1,HNRNPU,HSPA8,IGF2BP3,IL6,IREB2,KRT17,LARS,LSM14A,MKNK2,NCBP2,NCOR1,NFKB1,NUP214,PABPC4,PAIP2,PER2,PINK1,POLDIP3,PPP1CA,PSMA5,PSMA7,PSMB2,PSMB4,PSMB6,PSMD5,PSME4,PTBP1,PYM1,RPS14,S100A9,SAMD4A,STAT3,TAR…			GO: Biological Process	GO:2000060	positive regulation of ubiquitin-dependent protein catabolic process	10	ANAPC15,ANAPC16,ANAPC2,ANAPC4,ANAPC5,BTRC,CAV3,CCDC22,CDC16,CDC27,CDK1,CDK5RAP3,CUL1,EGF,FBXO5,FZR1,MAD2L1,PLK1,PSMA1,PSMA2,PSMA3,PSMA4,PSMA5,PSMA6,PSMA7,PSMB1,PSMB10,PSMB2,PSMB3,PSMB4,PSMB5,PSMB6,PSMB7,PSMC2,PSMC3,PSMC4,PSMC5,PSMC6,PSMD10,PSMD11,PSMD12,PSMD13,PSMD14,PSMD2,PSMD3,PSMD6,PSMD7,PSMD8,PSMD9,PSME1,PSME4,PSMF1,PTEN,PTK2,PTK2B,SKP1,SUMO3,UBA52,UBB,UBC,UBE2D1			GO: Biological Process	GO:0072521	purine-containing compound metabolic process	10	ACACA,ACACB,ACOT7,ACPP,ACR,ADCY10,ADCY8,ADCY9,ADK,ADORA2A,ADSSL1,AHCY,AHCYL1,AK1,AK5,AKAP5,ALDOC,AMPD1,AOX1,APLP1,APRT,ATIC,ATP1A2,ATP1B1,ATP2B2,ATP5F1A,ATP5F1C,ATP5F1D,ATP5MC1,ATP5MC2,ATP5MF,ATP5MG,ATP5PB,ATP5PD,ATP5PF,ATP5PO,ATP6V0A2,ATP6V0A4,ATP6V1A,ATP6V1B2,BPGM,CALCA,CALM3,CAP1,CARD11,CAT,CBS,CEP290,COX15,COX4I1,COX5A,COX5B,COX6B1,COX7A2L,COX7C,COX8A,CRH,CRHR1,CTNS,CXCL9,CXCR3,CYC1,DCAKD,DGU…			GO: Biological Process	GO:0043065	positive regulation of apoptotic process	5.62812	ABR,ADCY10,ADIPOQ,ADM,ADORA2A,AES,AGT,AIFM2,AKT1,ANXA1,ANXA5,APAF1,APBB2,APC,ARHGEF16,ARHGEF18,ARL6IP5,ATF2,ATF4,ATG7,B4GALT1,BAK1,BARD1,BAX,BBC3,BCAP31,BCL10,BCL2,BCL2A1,BCL2L1,BCL2L11,BCL2L13,BCLAF1,BEX3,BID,BIN1,BMP2,BNIP3,BNIP3L,BRMS1,CAMK1D,CAMK2D,CARD8,CASP1,CASP3,CASP6,CASP8,CAV1,CCAR1,CCL3,CCN1,CD44,CDC42,CDK5,CDK5R1,CDKN2A,CHEK2,CIDEB,COL18A1,CRADD,CREB1,CRYBA1,CSRNP3,CXCR2,CXCR3,CYCS,DA…			GO: Biological Process	GO:0006820	anion transport	10	ABAT,ABCA1,ABCA12,ABCA4,ABCA7,ABCC1,ABCC10,ABCC2,ABCC4,ABCD1,ABCD2,ABCD3,ABCG1,ACACA,ACSL3,ACSL6,AGTR2,AGXT,AKT2,ALB,ANO1,APBA1,APOA2,APOC1,APOC2,APOE,AQP6,AQP8,AQP9,ARG1,ASIC3,ASNA1,ATP10B,ATP11C,ATP8B2,ATP8B3,ATP8B4,ATP9A,BDKRB2,BEST1,BEST2,BSG,CA1,CA13,CA14,CA4,CA5B,CA7,CACNA1A,CCK,CFTR,CHRNA3,CHRNA4,CHRNA6,CHRNB2,CLCA1,CLCA2,CLCA4,CLCN1,CLCN3,CLCN4,CLCN6,CLCN7,CLCNKA,CLCNKB,CLIC2,CLIC6,CLTRN,…			GO: Biological Process
GO: Biological Process	GO:0051051	negative regulation of transport	5.84639	ABCG8,ACSL4,ACTN2,ADCYAP1,ADORA1,AKAP5,ANGPT1,ANKRD27,ANPEP,ANXA1,ANXA13,APOD,ASIC1,ATF4,ATG7,AVPR2,AXIN2,BAG4,BANK1,BCR,BEST3,C1QTNF3,CABP1,CALCA,CALM2,CASQ2,CD34,CNR1,COMT,CORO1A,CRH,CTTNBP2NL,CX3CL1,EDN2,EGF,ERBB3,ESR1,FBLN1,FCRL5,FGF23,FKBP1B,G3BP2,GDI1,GHSR,GNB5,GPR39,GRB10,GSK3B,HADH,HNF4A,HTR2A,IL11,IL1B,IL1RAPL1,IL36RN,IL6,INHA,INHBB,INSIG1,IRS1,ITGB1BP1,KCNE2,LIF,LILRB2,LITAF,LMBRD1,LRSA…			GO: Biological Process	GO:0051674	localization of cell	10	AAMP,ABCC1,ABHD2,ABHD6,ABI2,ABI3,ABL1,ACE,ACP5,ACVR1B,ACVRL1,ADAM10,ADAM15,ADAM8,ADAM9,ADARB1,ADCY3,AJUBA,AKAP4,ALKBH1,ALOX12,ALOX15B,AMOT,ANG,ANGPT1,ANGPT2,ANGPT4,ANXA1,ANXA5,AOC3,APBB1,APBB2,APCDD1,APEX1,APOB,APOD,APOE,ARAP3,ARHGAP18,ARHGAP24,ARHGAP4,ARHGAP5,ARHGDIB,ARHGEF5,ARHGEF7,ARL13B,ARPC2,ARRB2,ARX,ASCL1,ASPM,ASTN1,ATOH8,ATP1B1,ATP1B2,ATP2B4,ATP5F1B,AXL,AZU1,BAG4,BARHL1,BCAR1,BCAS3,BCL2,B…			GO: Biological Process	GO:0043066	negative regulation of apoptotic process	10	AARS,ADAM17,ADAR,ADCYAP1,APBB2,ARL6IP1,ASNS,ATP7A,BCL10,BCL3,BEX3,BIRC5,BMF,BTG2,CAV1,CCL5,CCNG1,CD59,CHD8,CREB3,CTNNA1,DAB2,DAPK1,DNAJC3,DOCK8,EFNA1,EIF2AK2,EP300,ERBB3,FLNA,FMN2,FOXP1,G2E3,GCLM,HERPUD1,HIPK2,HMGA2,HMGB2,HSP90AB1,HSP90B1,HSPA8,HTR2B,HYOU1,IL1A,IL6,IRAK1,KDM1A,KDR,KLF4,LEF1,LGALS3,LIMS1,LMNA,LRP1,MDK,MDM4,MECP2,MSH2,MYOCD,NAA38,NCL,NCOA3,NDNF,NFKB1,NGFR,NOC2L,NONO,NOTCH1,NOTCH2,N…			GO: Biological Process	GO:0055086	nucleobase-containing small molecule metabolic process	10	ABCA1,ABHD14B,ACACA,ACACB,ACR,ADCY4,ADCY7,ADCY8,ADCYAP1R1,ADK,ADNP,ADORA2B,ADRB3,ADSS,AHCY,AHCYL1,AHCYL2,AIPL1,AK1,AK8,AKAP6,ALDH6A1,ALDOA,ALDOC,AMPD2,AMPD3,APLP1,APOBEC2,APOBEC3G,APRT,AQP1,ATIC,ATP5F1A,ATP5F1B,ATP5F1C,ATP5F1D,ATP5IF1,ATP5MC1,ATP5MC2,ATP5MC3,ATP5MF,ATP5MG,ATP5PB,ATP5PD,ATP5PF,ATP6V0A1,ATP6V0A2,ATP6V1B1,AVPR2,BDNF,BHMT,BHMT2,CALCA,CALCR,CALCRL,CALM1,CALM2,CAP1,CAP2,CASK,CAT,CBS,CD…			GO: Biological Process	GO:0046034	ATP metabolic process	10	AK1,AK5,ALDOC,ATP1A2,ATP1B1,ATP5F1A,ATP5F1C,ATP5F1D,ATP5MC1,ATP5MC2,ATP5MF,ATP5MG,ATP5PB,ATP5PD,ATP5PF,ATP5PO,ATP6V0A2,ATP6V0A4,ATP6V1A,ATP6V1B2,BPGM,COX15,COX4I1,COX5A,COX5B,COX6B1,COX7A2L,COX7C,COX8A,CTNS,CYC1,DNAJC15,EIF6,ENO1,ENO3,ENTPD5,FBP1,FXN,GADD45GIP1,GALE,GALT,GCK,GPI,HIF1A,HK1,HK2,HSPA8,INSR,KHK,LDHA,MIF,MLXIPL,MPI,MYH3,MYH7,MYH8,MYOG,NCOR1,NDUFA11,NDUFA12,NDUFA13,NDUFA2,NDUFA3,NDUFA4…			GO: Biological Process	GO:0044092	negative regulation of molecular function	5.57196	A2M,ABCA7,ACTN2,ADAM15,ADCYAP1,ADIPOQ,ADNP,ADORA2A,AES,AGT,AHSG,AIM2,AKAP5,AKT1,AMBP,AMOT,ANAPC16,ANGPTL3,ANGPTL4,ANK3,ANXA1,ANXA5,APBA3,APC,APCS,APLP2,APOA2,APOC2,ARFGEF3,ARHGAP28,ARPP19,ASPN,ATP1A2,AURKA,BAX,BCL2A1,BCL2L1,BEX3,BGN,BIRC5,BRMS1,BTAF1,BUB1B,CAB39,CABIN1,CALM1,CAMK2D,CAMK2N1,CAND1,CASP3,CASP8,CASQ2,CAT,CAV1,CCNB1,CD27,CD2BP2,CD44,CDC20,CDC23,CDC26,CDC27,CDKN1C,CDKN2A,CDKN2D,CEBPG,C…			GO: Biological Process	GO:0030155	regulation of cell adhesion	10	ABAT,ABI3BP,ACP5,ACTN4,ACVRL1,ADAM10,ADAM15,ADAM22,ADAMTS18,ADIPOQ,ADK,ADRM1,AGR2,ALOX12,ALOX15,ANK3,APBB1IP,APOD,ARHGAP6,ARHGDIG,ARHGEF7,ARL2,ASS1,ATP5F1B,BCAS3,BMP2,BMP4,BMP7,BTN1A1,C1QBP,C1QTNF1,CARD11,CASK,CBLB,CBLL1,CCDC88B,CCL19,CCL2,CCL21,CCL25,CCL28,CCL5,CCR7,CD1D,CD2,CD209,CD244,CD247,CD27,CD274,CD276,CD28,CD3D,CD3E,CD3G,CD4,CD5,CD55,CD59,CDC42,CDH1,CDH13,CDKN2A,CHRD,CITED2,CLEC4G,CLEC4M…			GO: Biological Process
GO: Biological Process	GO:0030198	extracellular matrix organization	5.79826	ADAM10,ADAM15,ADAM8,ADAMTSL4,APLP2,APP,B4GALT1,CAPG,CD44,CD47,COL10A1,COL13A1,COL16A1,COL2A1,COL3A1,COL4A1,COL4A2,COL4A4,COL5A1,COL5A2,COL9A1,CST3,CTSG,CTSL,CTSS,CTSV,DDR2,ECM2,EGFLAM,ELF3,ERCC2,ETS1,F11R,FAP,FBLN1,FGFR4,FMOD,GREM1,HAPLN1,HAS3,HTRA1,IBSP,ITGA1,ITGA3,ITGA6,ITGA9,ITGB5,LAMA3,LAMB1,LAMC3,LEMD3,LOX,LUM,MATN3,MFAP2,MMP14,MMP8,NID1,P3H1,PDGFA,PDGFRA,PHLDB1,PHLDB2,PLOD3,POSTN,PRSS2,PXDN…			GO: Biological Process	GO:0022603	regulation of anatomical structure morphogenesis	10	ABL1,ACHE,ACVRL1,ADAM9,ADAMTS1,ADGRB1,ADGRB2,ADGRB3,ADM2,ADNP,ADORA2B,ALOX12,AMOT,ANAPC2,ANGPT2,ANGPT4,ANKRD23,ANKRD6,ANXA1,ANXA7,AP2A1,AP2A2,AP2B1,APOE,ARAP3,ARHGAP15,ARHGAP18,ARHGAP4,ARHGEF1,ARHGEF19,ARHGEF7,ARPC2,ARRB2,ASB4,ASPN,AXIN2,BAIAP2,BCL2,BCL6,BCL9L,BCOR,BCR,BMP7,BNIP3,BRAF,BTBD7,C3,C5,C6,CACNA1A,CAMK1,CAMSAP1,CAPRIN1,CAPRIN2,CAPZB,CARM1,CASP6,CASZ1,CAV3,CCL11,CCL2,CCL24,CCL3,CCL7,CCN6…			GO: Biological Process	GO:0044033	multi-organism metabolic process	10	APOBEC3F,APOBEC3G,CCL5,CCNT1,EIF3B,EIF3D,EP300,FMR1,HMGA2,IFITM3,LEF1,NOTCH1,NUP205,NUP210,NUP214,NUP54,NUP58,POLR2A,PTBP1,RPL13,RPL19,RPL23,RPL27,RPL27A,RPL3,RPL30,RPL31,RPL32,RPL37,RPL9,RPLP1,RPS12,RPS14,RPS19,RPS26,RPS6,RPS7,SMARCA4,TARDBP,TPR			GO: Biological Process	GO:1901135	carbohydrate derivative metabolic process	10	A4GNT,ABCA1,ABCA7,ABCC5,ABHD10,ABHD14B,ACACA,ACACB,ACAN,ACOT8,ACR,ADAMTSL1,ADCY4,ADCY7,ADCY8,ADCYAP1R1,ADK,ADNP,ADORA2B,ADRB3,ADSS,AHCY,AHCYL1,AHCYL2,AIPL1,AK1,AKAP6,AKR1A1,AKR1C1,AKR1C2,AKT1,ALDH5A1,ALDOA,ALDOC,ALG1,ALG13,ALG14,ALG2,ALG3,ALG6,ALG9,AMDHD2,AMPD2,AMPD3,APLP1,APOBEC2,APOBEC3G,APRT,AQP1,ARSA,ARSB,ARSE,ARSF,ART1,ART4,ASAH1,ASGR2,ATIC,ATP4B,ATP5F1A,ATP5F1B,ATP5F1C,ATP5F1D,ATP5IF1,ATP5M…			GO: Biological Process	GO:0055086	nucleobase-containing small molecule metabolic process	10	ACACA,ACACB,ACOT7,ACPP,ACR,ADCY10,ADCY8,ADCY9,ADK,ADORA2A,ADSSL1,AHCY,AHCYL1,AK1,AK5,AK8,AKAP5,ALDOC,AMPD1,AOX1,APLP1,APOBEC3A,APOBEC3C,APRT,ATIC,ATP1A2,ATP1B1,ATP2B2,ATP5F1A,ATP5F1C,ATP5F1D,ATP5MC1,ATP5MC2,ATP5MF,ATP5MG,ATP5PB,ATP5PD,ATP5PF,ATP5PO,ATP6V0A2,ATP6V0A4,ATP6V1A,ATP6V1B2,BPGM,CAD,CALCA,CALM3,CANT1,CAP1,CARD11,CAT,CBS,CDA,CEP290,CMPK1,CNGB3,COX15,COX4I1,COX5A,COX5B,COX6B1,COX7A2L,COX7C…			GO: Biological Process	GO:1903320	regulation of protein modification by small protein conjugation or removal	5.55014	AHRR,AIMP2,ANAPC16,ANKS1A,ARRDC3,ARRDC4,ATG7,AXIN1,BCL10,BMI1,BUB1B,CAPN3,CAV1,CCDC22,CCNB1,CDC20,CDC23,CDC26,CDC27,CDK5,CDK9,CDKN2A,CHFR,CHP1,CRY1,DCUN1D2,DCUN1D5,DISC1,DNAJB2,EGF,EGR1,FBXO4,FEM1B,FGFR3,FKBP1A,FYN,GCLC,GNL3,GTPBP4,HAMP,HDAC4,HSP90AB1,HSPBP1,ISG15,ITCH,LIMK1,MAD2L1,MASTL,MTA1,NDFIP2,NGF,NOD2,PARP10,PAXIP1,PDCL3,PELI1,PELI3,PHF23,PIAS1,PIAS3,PIN1,PLK1,PML,PRKCE,PSEN1,PSEN2,PSMA1,P…			GO: Biological Process	GO:0009887	animal organ morphogenesis	10	ABLIM1,ACP5,ACTA2,ACVR1,ADAM15,ADAMTS1,ADAMTS16,AES,AFDN,AGTPBP1,AGTR2,ALDH1A1,ALDH1A2,ALPL,ALX3,ALX4,AMBN,AMELX,ANKRD11,ANKRD6,AP2A1,AP2M1,AP2S1,APLP1,AQP3,AQP6,AR,ARG1,ASPN,ATF2,AXIN2,B4GALT1,BARX2,BASP1,BCAR3,BCR,BGLAP,BHLHE41,BMP1,BMP2,BMP4,BMP7,BMPR1A,BMPR1B,BSG,CABP4,CASP6,CBS,CCDC39,CCDC40,CCL11,CCL2,CDC42,CDH1,CDKN2A,CDX2,CDX4,CELSR1,CER1,CHAD,CHRNA10,CHST11,CHSY1,CHUK,CITED1,CITED2,CLDN5…			GO: Biological Process
GO: Biological Process	GO:0008202	steroid metabolic process	5.77234	ABCB11,ACADVL,ACLY,AKR1C1,AKR1C2,AMACR,APLP2,APOB,APOBR,APP,ATP1A1,BMP2,BMP5,CAT,COMT,CRH,CYB5R2,CYP27A1,CYP27B1,CYP2E1,CYP46A1,CYP7A1,CYP7B1,DHCR7,ERLIN1,ERLIN2,ESR1,FABP6,FDFT1,FDPS,FDX1,FDXR,FGF1,FGF19,FGF23,FGFR4,GC,HINT2,HSD11B1,HSD17B1,HSD17B2,HSD17B4,HSD17B7,HSD3B2,HSD3B7,IGF2,IGFBP7,IL1B,INSIG1,LGMN,LHCGR,LIPA,LRP1,LSS,MBTPS2,MT3,NR0B2,NSDHL,PCSK9,PCTP,PDGFRA,PEX2,PROX1,RDH16,RDH8,RORC,SC…			GO: Biological Process	GO:0043408	regulation of MAPK cascade	10	ABCA7,ABL1,ACE2,ADAM8,ADAM9,ADORA2B,ADRA1B,ADRB3,AJUBA,ALK,ALOX12B,AMBP,ANGPT1,ANKRD6,APIP,APOE,ARHGEF5,ARL6IP5,ARRB2,ASH1L,ATP6AP1,ATP6AP2,BANK1,BIRC7,BMP1,BMP15,BMP6,BMP7,BRAF,C1QTNF1,C3,C3orf33,C5,CARD9,CAV2,CAV3,CAVIN3,CBLC,CBS,CCL1,CCL11,CCL16,CCL17,CCL18,CCL19,CCL2,CCL22,CCL24,CCL3,CCL4,CCL7,CCL8,CCN2,CD27,CD40,CD44,CD74,CD81,CD84,CDC42,CDC42SE1,CDK1,CDK12,CEACAM1,CHRNA7,CIB1,CLCF1,CNTF,COP…			GO: Biological Process	GO:0035967	cellular response to topologically incorrect protein	10	AARS,ACADVL,ASNS,ATF3,ATF4,ATF6,ATXN3,BBC3,BCL2L11,CREB3,CREB3L2,CREBRF,DDIT3,DNAJB9,DNAJC3,EDEM2,EIF2AK2,EP300,HDGF,HERPUD1,HSP90B1,HYOU1,IGFBP1,LMNA,PARP16,PDIA5,SEC31A,SHC1,TLN1,XBP1			GO: Biological Process	GO:0045471	response to ethanol	10	AACS,ABAT,ACTC1,ADCY7,ADCYAP1R1,ADH6,ADIPOQ,ALAD,ARSA,ATP5MC3,BAK1,BIRC2,CASP8,CAT,CCL5,CCND1,CD14,CD27,CDK1,CDO1,CHRNA7,CHRNB2,CNR1,CRH,CRHBP,CRHR1,CTSB,DMAP1,DNMT3A,DRD1,DRD2,DRD4,EEF1B2,EEF2,EIF4EBP1,G6PD,GGH,GNRH1,GOT2,GRIN1,GRIN2A,GRIN3A,GSTP1,HMGCS2,HTR3A,IGF2,IL13,IL1B,IL4,ITPR2,KCNMB1,LCT,LEP,MGMT,MSTN,NEU2,NKX2-1,NOS1,NTRK3,OGG1,OPRM1,OXCT1,PEMT,PRKCE,PSMD14,PTEN,PTH,PTK2B,RXRA,S100A8,SD…			GO: Biological Process	GO:1901135	carbohydrate derivative metabolic process	10	A4GNT,ABHD12,ACACA,ACACB,ACOT7,ACP6,ACPP,ACR,ADAMTS13,ADAMTSL1,ADAMTSL4,ADCY10,ADCY8,ADCY9,ADK,ADORA2A,ADSSL1,AHCY,AHCYL1,AK1,AK5,AKAP5,AKR1B10,AKT1,ALDOC,ALG1,ALG12,ALG6,ALG8,AMPD1,ANGPT1,AP2A1,APCS,APLP1,APOBEC3A,APOBEC3C,APRT,ARF4,ARSB,ARSD,ARSE,ARSF,ARSG,ARSI,ART4,ATIC,ATP1A2,ATP1B1,ATP2B2,ATP5F1A,ATP5F1C,ATP5F1D,ATP5MC1,ATP5MC2,ATP5MF,ATP5MG,ATP5PB,ATP5PD,ATP5PF,ATP5PO,ATP6V0A2,ATP6V0A4,ATP6…			GO: Biological Process	GO:0008285	negative regulation of cell proliferation	5.51867	A4GNT,ACVRL1,ADCYAP1,ADGRB1,ADGRG1,ADIPOQ,ADM,ADORA1,ADORA2A,ADORA2B,AGT,AIMP1,AIMP2,APC,APOH,AR,ASPH,ATF2,ATF5,ATOH8,B4GALT1,BAK1,BAX,BCHE,BCL11B,BCL2,BDKRB2,BDNF,BMP2,BRCA2,BTLA,BTN1A1,CASK,CASP3,CAV1,CAV2,CBLB,CCN5,CD33,CD44,CD9,CDC6,CDC73,CDH13,CDH5,CDK10,CDKN1C,CDKN2A,CDKN2D,CEND1,CER1,CERS2,CGRRF1,CHERP,CLEC4G,CNOT7,COL18A1,COMT,CSK,CTBP1,CTNNBIP1,CTSV,CXCL8,CXCR3,CYP27B1,DDX20,DEC1,DHRS2,D…			GO: Biological Process	GO:0000904	cell morphogenesis involved in differentiation	10	ABI1,ABLIM1,ACHE,ACTB,ACTN4,ADAM15,ADCY1,ADGRB1,AKAP5,ALCAM,AMELX,ANAPC2,ANK3,ANKRD27,APBB1,APBB2,APOE,AR,ARHGEF7,ARX,ATG7,ATL1,AXIN2,BAIAP2,BASP1,BCL11A,BMP2,BMP4,BMP5,BMP7,BMPR1B,BOC,BRSK1,BRSK2,C1QBP,CABP4,CACNA1A,CACNA1F,CAMK2A,CAMK2B,CCK,CDC42,CDH1,CDH11,CDH4,CDK5,CDK5R1,CDKL3,CDKL5,CFL1,CGN,CHL1,CHN1,CHRNA3,CHRNB2,CITED1,CLEC1B,CLRN1,CNMD,CNP,CNTN2,CNTN4,CRABP2,CRMP1,CRYAA,CTNNA2,CUL7,CUX1,…			GO: Biological Process
GO: Biological Process	GO:0006935	chemotaxis	5.76462	ACKR2,ADAM10,ADAM8,ALCAM,ANGPT1,ANXA1,APP,ARHGEF16,BCL11B,BDNF,CALCA,CCL18,CCL2,CCL23,CCL5,CDH13,CHN1,CKLF,CMTM4,CMTM7,CNR2,CNTN2,CORO1A,CORO1B,CX3CL1,CXCL10,CXCL11,CXCL13,CXCL17,CXCL8,CXCL9,CXCR2,DCC,DLX5,DOCK2,DPYSL2,DPYSL5,DSCAM,EDN2,EDNRB,EFNA3,EFNA4,EFNB2,ENPP2,EPHA5,ERBB2,ETV1,ETV4,EVL,EXT1,F7,FCER1G,FEZ1,FEZ2,FGF1,FLRT3,FMOD,FYN,FZD3,GFRA3,GLI2,GPC1,GREM1,HOXA1,IL12A,IL1B,IL6,ISL2,ITGA1,IT…			GO: Biological Process	GO:0007169	transmembrane receptor protein tyrosine kinase signaling pathway	10	ABL1,ACTB,ACTG1,ACTR2,ADAM10,ADAMTS3,ADRM1,AGR2,AHSG,AKT1S1,ALK,ANGPT1,ANGPT2,ANGPT4,AP2A1,AP2A2,AP2B1,AP3S1,APOD,APP,APPL1,ARHGEF7,ARPC1B,ARPC2,ARPC4,ATP6AP1,ATP6V0A2,ATP6V0A4,ATP6V0C,ATP6V0D1,ATP6V0E1,ATP6V1B1,ATP6V1C1,ATP6V1E1,ATP6V1F,ATP6V1G3,ATXN7,AXL,BAIAP2,BAIAP2L1,BAIAP2L2,BCAR1,BCR,BDKRB2,BLK,CAMLG,CASP3,CAV2,CBL,CBLC,CCL2,CCN2,CD4,CD7,CD8A,CD8B,CDC42,CDH13,CEACAM1,CEP57,CHN1,CHRNA3,CILP…			GO: Biological Process	GO:0048729	tissue morphogenesis	10	ACTA1,ADAM17,ALDH1A3,AP2M1,ARID1A,ARL13B,ATP7A,BCL10,CCM2L,CELSR1,CHD7,COL4A1,COL5A1,CPLANE1,CXCR4,DAB2,DAG1,DICER1,DLG3,DLG5,DSP,DVL2,EFNB2,EPHA7,EZR,FLNA,FOXF2,FOXP1,FZD6,GATA4,GRSF1,HECTD1,HEG1,HES1,HIPK2,HMGA2,HS2ST1,IL6,INHBA,KDM5B,KDR,KLF4,KRT17,KRT6B,LAMA5,LCP1,LEF1,LHX1,MDM4,MED12,MICAL2,MSN,MTHFD1L,NCOA3,NGFR,NOTCH1,NOTCH2,NUMB,POU2F1,PPP1CA,PSMA5,PSMA7,PSMB2,PSMB4,PSMB6,PSMD5,PSME4,PTCH…			GO: Biological Process	GO:0043410	positive regulation of MAPK cascade	10	ABCA7,ADAM8,ADAM9,ADORA1,ADORA2B,ADRA1B,ADRB3,AGT,ALK,ALOX15,ANKRD6,AR,ARL6IP5,ARRB1,ATP6AP1,BANK1,BCL10,BMP4,BNIP2,BRAF,C1QTNF2,C1QTNF3,CAMK2D,CCL1,CCL11,CCL13,CCL16,CCL17,CCL18,CCL19,CCL20,CCL21,CCL22,CCL23,CCL24,CCL25,CCL26,CCL3,CCL4,CCL5,CCL8,CD27,CD40,CD81,CD84,CDH2,CDK1,CDON,CHI3L1,CHRNA7,CNTF,CRHR2,CRK,CSF1R,CSPG4,DAB2IP,DCC,DRD2,DRD4,DUSP9,EDN3,EGF,EGFR,ELANE,EPHA8,EPO,EPOR,ERBB4,ERP29,FG…			GO: Biological Process	GO:0010256	endomembrane system organization	10	ABCA12,ACSL3,ADIPOQ,AGFG1,AKAP8L,AKT1,ALS2,ALS2CL,ANK1,AP2M1,ARFGEF2,ARHGEF16,ARHGEF7,ATL2,ATP1B1,ATP1B3,ATP8B2,ATP8B3,ATP8B4,BAG5,BAIAP2,BANF1,BBS2,BCAS3,BIN2,BLOC1S2,BNIP1,BSG,C16orf70,CACNB3,CAV3,CCDC47,CDAN1,CDC42,CDK1,CHMP1A,CHMP2B,CHMP4A,CHMP4C,CHMP6,CHMP7,CLCN3,CLIP1,CLN3,CNEP1R1,COG1,COG3,COG4,COL4A3BP,COL5A1,CRB3,CREB1,CSK,CUL7,DCHS1,DENND4C,DLG1,DMPK,DNAJC13,DNAJC28,DNM1,DNM2,DPP6,DYM,E…			GO: Biological Process	GO:0010942	positive regulation of cell death	5.45327	ABR,ADCY10,ADIPOQ,ADM,ADORA2A,AES,AGT,AIFM2,AIMP2,AKT1,ANXA1,ANXA5,APAF1,APBB2,APC,ARHGEF16,ARHGEF18,ARL6IP5,ATF2,ATF4,ATG7,B4GALT1,BAK1,BARD1,BAX,BBC3,BCAP31,BCL10,BCL2,BCL2A1,BCL2L1,BCL2L11,BCL2L13,BCLAF1,BEX3,BID,BIN1,BMP2,BNIP3,BNIP3L,BRMS1,CAMK1D,CAMK2D,CARD8,CASP1,CASP3,CASP6,CASP8,CAV1,CCAR1,CCL3,CCN1,CD44,CDC42,CDK5,CDK5R1,CDKN2A,CHEK2,CIDEB,COL18A1,CRADD,CREB1,CRH,CRYBA1,CSRNP3,CXCR2,CXC…			GO: Biological Process	GO:0048878	chemical homeostasis	10	AACS,ABCA1,ABCA12,ABCB6,ABCB7,ABCC2,ABCG1,ABCG2,ABCG5,ACACA,ACAD10,ACAD8,ACADL,ACADS,ACADVL,ACOX3,ACSM1,ADCY1,ADCY8,ADCY9,ADCYAP1R1,ADIPOQ,ADIPOR2,ADRA1A,ADRA1B,ADRA1D,AGTR2,AKAP5,AKAP6,ALAS2,ALOX12,ALOXE3,AMELX,ANGPTL8,ANK1,ANK3,ANO1,ANPEP,ANXA7,APLP2,APOA2,APOB,APOC2,APOC4,APOE,AQP10,AQP2,AQP3,AQP4,AQP6,AQP8,AQP9,ARF1,ASPH,ASPSCR1,ATG7,ATOX1,ATP12A,ATP13A1,ATP13A2,ATP13A4,ATP1B2,ATP2A1,ATP2A2,A…			GO: Biological Process
GO: Biological Process	GO:0044282	small molecule catabolic process	5.76188	AASS,ABHD12,ACADVL,ACOT2,ACOT7,ADPRM,AHCY,ALDH3A2,ALDH4A1,ALDH6A1,ALDOC,AMACR,ASRGL1,ATP2B4,AUH,BCKDHB,BDH2,CARNS1,CBS,CNR1,CPT1A,CPT1B,CPT1C,CRYL1,CYP27B1,CYP46A1,CYP7A1,DBT,DECR1,DLST,DMGDH,ENO2,ENPP2,ETFB,FAH,FGF23,FUT1,FUT10,GAD2,GALK1,GALT,GAPDHS,GCAT,GCDH,GLB1,GLO1,GLS2,GLUD1,GLUL,GPI,GPT2,GSTZ1,HADH,HADHA,HAO1,HK1,HNMT,HSD17B4,HSD3B7,IDUA,IL4I1,INPP1,IRS1,KHK,MLYCD,MT3,MTMR2,MTRR,MUT,NUDT3…			GO: Biological Process	GO:0023014	signal transduction by protein phosphorylation	10	ABCA7,ABL1,ACE2,ACVR1B,ACVR2A,ACVRL1,ADAM8,ADAM9,ADORA2B,ADRA1B,ADRB3,AJUBA,ALK,ALOX12B,AMBP,ANGPT1,ANKRD6,APIP,APOE,ARHGEF5,ARHGEF6,ARL6IP5,ARRB2,ASH1L,ATP6AP1,ATP6AP2,BANK1,BIRC7,BMP1,BMP15,BMP6,BMP7,BRAF,BRAP,C1QTNF1,C3,C3orf33,C5,CAB39,CALM1,CALM2,CAMK2A,CARD9,CAV2,CAV3,CAVIN3,CBLC,CBS,CCL1,CCL11,CCL16,CCL17,CCL18,CCL19,CCL2,CCL22,CCL24,CCL3,CCL4,CCL7,CCL8,CCM2,CCN2,CCR3,CD27,CD40,CD44,CD74,C…			GO: Biological Process	GO:0060429	epithelium development	10	AARS,ACADVL,ADAM17,ALDH1A3,AP2M1,ARG2,ARID1A,ARL13B,ATP7A,BASP1,BCL10,BRCA2,BTG1,CAV1,CBFA2T2,CD34,CDH3,CELSR1,CHD7,CLOCK,COL4A1,COL5A1,CPLANE1,CPS1,CXCR4,DAB2,DAG1,DICER1,DLG3,DLG5,DSP,DVL2,E2F7,EDAR,EFNB2,ELF3,EP300,EPHA7,EZR,FA2H,FLNA,FLNB,FNDC3B,FOXF2,FOXP1,FOXP4,FRMD6,FZD6,GAL,GATA4,GRSF1,HECTD1,HEG1,HES1,HS2ST1,IL1A,IL6,INHBA,KDM5B,KDR,KLF2,KLF4,KLF5,KRT14,KRT17,KRT6B,LAMA5,LATS2,LCP1,LEF1,…			GO: Biological Process	GO:1901701	cellular response to oxygen-containing compound	10	AACS,AANAT,ABCA1,ABCB4,ACACA,ADAM9,ADCY4,ADCY7,ADCY8,ADD1,ADIPOQ,ADRM1,AGT,AGTR1,AHCYL1,AHSG,AIFM1,AKAP1,AKAP6,AKAP7,AKAP9,AKR1C1,AKR1C2,AKT1,AKT3,ALDH1A2,ANKRD26,ANXA1,AOC1,AP3S1,APLP1,APOB,APPL1,APRT,AQP1,AQP2,AQP4,AQP8,AQP9,ARG1,ARHGEF2,ARRB1,ASS1,ATG7,ATP2B1,ATP2B4,ATP6AP1,ATP6V0A1,ATP6V0A2,ATP6V0C,ATP6V0D1,ATP6V1B1,ATP6V1D,ATP6V1G3,AVPR1A,AXL,BAIAP2L1,BAIAP2L2,BCL2L1,BLM,BMP4,BMP7,BRSK2,BYSL…			GO: Biological Process	GO:0009161	ribonucleoside monophosphate metabolic process	10	ADK,ADSSL1,AK1,AK5,ALDOC,AMPD1,APRT,ATIC,ATP1A2,ATP1B1,ATP5F1A,ATP5F1C,ATP5F1D,ATP5MC1,ATP5MC2,ATP5MF,ATP5MG,ATP5PB,ATP5PD,ATP5PF,ATP5PO,ATP6V0A2,ATP6V0A4,ATP6V1A,ATP6V1B2,BPGM,CAD,CARD11,CMPK1,COX15,COX4I1,COX5A,COX5B,COX6B1,COX7A2L,COX7C,COX8A,CTNS,CYC1,DLG1,DLG3,DLG4,DNAJC15,EIF6,ENO1,ENO3,ENTPD5,FBP1,FXN,GADD45GIP1,GALE,GALT,GART,GCK,GPI,HIF1A,HK1,HK2,HSPA8,INSR,KHK,LDHA,MIF,MLXIPL,MPI,MPP3,M…			GO: Biological Process	GO:0043068	positive regulation of programmed cell death	5.44109	ABR,ADCY10,ADIPOQ,ADM,ADORA2A,AES,AGT,AIFM2,AKT1,ANXA1,ANXA5,APAF1,APBB2,APC,ARHGEF16,ARHGEF18,ARL6IP5,ATF2,ATF4,ATG7,B4GALT1,BAK1,BARD1,BAX,BBC3,BCAP31,BCL10,BCL2,BCL2A1,BCL2L1,BCL2L11,BCL2L13,BCLAF1,BEX3,BID,BIN1,BMP2,BNIP3,BNIP3L,BRMS1,CAMK1D,CAMK2D,CARD8,CASP1,CASP3,CASP6,CASP8,CAV1,CCAR1,CCL3,CCN1,CD44,CDC42,CDK5,CDK5R1,CDKN2A,CHEK2,CIDEB,COL18A1,CRADD,CREB1,CRYBA1,CSRNP3,CXCR2,CXCR3,CYCS,DA…			GO: Biological Process	GO:0055082	cellular chemical homeostasis	10	AACS,ABCB6,ABCB7,ABCC2,ABCG2,ADCYAP1R1,ADRA1A,ADRA1B,ADRA1D,AGTR2,AKAP5,AKAP6,ALAS2,ANO1,ANXA7,APLP2,APOE,AQP10,AQP2,AQP3,AQP4,AQP6,AQP8,AQP9,ARF1,ASPH,ATG7,ATOX1,ATP12A,ATP13A1,ATP13A2,ATP13A4,ATP1B2,ATP2A1,ATP2A2,ATP2A3,ATP2B3,ATP2C1,ATP2C2,ATP4A,ATP5F1B,ATP6V0A1,ATP6V0A4,ATP6V0B,ATP6V0C,ATP6V0D1,ATP6V0E1,ATP6V1B2,ATP6V1C1,ATP6V1C2,ATP6V1E1,ATP6V1F,ATP6V1H,AVPR1B,BBC3,BCAP31,BDKRB1,BDKRB2,BIRC5…			GO: Biological Process
GO: Biological Process	GO:0040012	regulation of locomotion	5.75213	ABHD2,ABHD6,ADAM10,ADAM15,ADAM8,ADAM9,ADORA1,ADORA3,ANGPT1,ANXA1,APOD,ARAP3,ARHGAP4,ARHGAP5,ARHGDIB,ARPC2,BAG4,BCR,BMP2,BMP5,C5orf30,CAPN7,CCL2,CCL5,CDH13,CEMIP,CGA,CITED2,CLIC4,COL3A1,CORO1A,CORO1B,CX3CL1,CXCL10,CXCL11,CXCL13,CXCL8,CXCL9,CXCR2,DBN1,DDR2,DDX58,DLL4,DOCK10,DSCAM,ECM1,EDN2,EFNB2,EGF,ELP1,ELP3,EMP2,ENPP2,ERBB2,ERBB3,ERBB4,ETS1,EVL,EXOC7,F10,F7,FADD,FBLN1,FBXW7,FCN1,FGF1,FGFR1OP,FLNA…			GO: Biological Process	GO:1902533	positive regulation of intracellular signal transduction	10	ABCA7,ABL1,ABRA,ADAM8,ADAM9,ADORA2B,ADRA1B,ADRB3,AJUBA,ALK,ALOX12B,ALS2,ANGPT1,ANKRD17,ANKRD6,APOL3,ARFGEF1,ARHGEF5,ARL6IP5,ARPP19,ARRB2,ASPH,ATP6AP1,AXL,BAG4,BANK1,BCAP31,BCL2,BCL2L11,BCLAF1,BID,BIRC7,BMF,BRAF,BRD4,BST2,BUB1,C1QTNF1,C3,C5,CALM1,CALM2,CANT1,CARD11,CARD14,CARD9,CASP1,CASP10,CASP8,CAV2,CAVIN3,CBL,CC2D1A,CCDC22,CCL1,CCL11,CCL16,CCL17,CCL18,CCL19,CCL2,CCL22,CCL24,CCL3,CCL4,CCL7,CCL8,…			GO: Biological Process	GO:0014070	response to organic cyclic compound	10	ABCA3,ACSL1,ACTA1,ADAR,ADCYAP1,AGO1,AKAP13,ALAD,ALDH3A1,AQP9,ARID1A,ASNS,ATF1,ATP12A,ATP7B,BRCA2,BTG2,CAD,CALM2,CARM1,CATSPERB,CAV1,CCL5,CD83,CLOCK,CPS1,CREBRF,CRY1,CTNNA1,CYP1B1,DAB2,DDX58,DICER1,DNMT3B,DSG2,EEF2,EIF2AK2,ENDOG,EP300,ESRRG,EZR,FGF23,FOS,FOXP1,GABRB1,GAL,GATA4,HMGB2,HNRNPA2B1,HNRNPU,HSP90AB1,HSP90B1,HTR2B,IFIT1,IL6,INHBA,ITPR1,ITPR2,ITPR3,KANK2,KCNQ1,KLF2,KLF4,KLF9,KRT19,LEF1,LOX,…			GO: Biological Process	GO:2000058	regulation of ubiquitin-dependent protein catabolic process	10	ANAPC15,ANAPC16,ANAPC2,ANAPC4,ANAPC5,ANKS1A,BTRC,CAV3,CCDC22,CDC16,CDC27,CDK1,CDK5RAP3,CUL1,EGF,FBXO5,FZR1,HFE,MAD2L1,PLK1,PSEN2,PSMA1,PSMA2,PSMA3,PSMA4,PSMA5,PSMA6,PSMA7,PSMB1,PSMB10,PSMB2,PSMB3,PSMB4,PSMB5,PSMB6,PSMB7,PSMC2,PSMC3,PSMC4,PSMC5,PSMC6,PSMD10,PSMD11,PSMD12,PSMD13,PSMD14,PSMD2,PSMD3,PSMD6,PSMD7,PSMD8,PSMD9,PSME1,PSME4,PSMF1,PTEN,PTK2,PTK2B,SKP1,SUMO3,UBA52,UBB,UBC,UBE2D1,WNT1			GO: Biological Process	GO:0043043	peptide biosynthetic process	10	AARS,ACO1,ADAD1,AGO1,AGO4,AIMP1,AKT1,APLP1,ATF4,ATXN2,BANK1,BDH2,BTG2,C1QBP,CALR,CARNS1,CARS,CARS2,CCL5,CD28,CDK5RAP1,CELF1,CELF4,CHAC1,CHCHD1,CNDP2,CNOT1,CNOT11,CNOT7,CNOT8,CNOT9,COA3,COPS5,CTIF,DAPK1,DAPK3,DARS2,DAZL,DDX1,DDX6,DENR,DHX29,DNAJC1,DTD1,EEF1A2,EEF1D,EEF1E1,EEF2,EEF2K,EEFSEC,EFL1,EFTUD2,EGFR,EIF1,EIF1AY,EIF1B,EIF2A,EIF2AK3,EIF2B1,EIF2B2,EIF2B3,EIF2B4,EIF2B5,EIF2S2,EIF2S3,EIF3B,EIF3E…			GO: Biological Process	GO:0009057	macromolecule catabolic process	5.40661	ACR,ADRA1B,AGAP2,AGO1,AGO2,AGO4,AGXT,AKT1,AMBP,ANAPC16,ANKS1A,ANKZF1,APAF1,APC,APOB,ARIH1,ARNTL,ASB9,ATE1,ATG7,ATXN3,AURKA,AXIN1,AZIN1,BACE1,BANP,BARD1,BAX,BBS7,BCAN,BCAP31,BFAR,BGN,BNIP3,BNIP3L,BRSK2,BUB1B,C18orf25,C4BPA,CALM1,CASC3,CASP3,CASP8,CAV1,CBLB,CCDC22,CCNB1,CD44,CD81,CDC20,CDC23,CDC26,CDC27,CDC42,CDK5,CDKN2A,CENPE,CHEK2,CHFR,CHI3L2,CHIA,CHMP4C,CHP1,CNOT3,CNOT7,CPA2,CPVL,CRBN,CREBRF,CSN…			GO: Biological Process	GO:0098660	inorganic ion transmembrane transport	10	ACACA,ACTN2,ACTN4,AHNAK,AKAP6,ANK3,ANO1,ARF1,ASIC2,ASIC3,ASPH,ATOX1,ATP12A,ATP13A1,ATP1B2,ATP2A1,ATP2A2,ATP2A3,ATP2B3,ATP2C1,ATP2C2,ATP4A,ATP4B,ATP5F1A,ATP5F1B,ATP5F1D,ATP5MG,ATP5PO,ATP6AP1,ATP6V0A1,ATP6V0A4,ATP6V0B,ATP6V0C,ATP6V0D1,ATP6V0E1,ATP6V1B2,ATP6V1C1,ATP6V1C2,ATP6V1E1,ATP6V1F,ATP6V1H,BBC3,BDKRB1,BEST1,BEST2,BMP4,BPIFA1,CACFD1,CACNA1A,CACNA1C,CACNA1F,CACNA1H,CACNA1I,CACNA1S,CACNA2D1,CACNB…			GO: Biological Process
GO: Biological Process	GO:0043062	extracellular structure organization	5.74395	ADAM10,ADAM15,ADAM8,ADAMTSL4,APLP2,APP,B4GALT1,CAPG,CD44,CD47,COL10A1,COL13A1,COL16A1,COL2A1,COL3A1,COL4A1,COL4A2,COL4A4,COL5A1,COL5A2,COL9A1,CST3,CTSG,CTSL,CTSS,CTSV,DDR2,ECM2,EGFLAM,ELF3,ERCC2,ETS1,F11R,FAP,FBLN1,FGFR4,FMOD,GREM1,HAPLN1,HAS3,HTRA1,IBSP,ITGA1,ITGA3,ITGA6,ITGA9,ITGB5,LAMA3,LAMB1,LAMC3,LEMD3,LOX,LUM,MATN3,MFAP2,MMP14,MMP8,NID1,P3H1,PDGFA,PDGFRA,PHLDB1,PHLDB2,PLOD3,POSTN,PRSS2,PXDN…			GO: Biological Process	GO:0002684	positive regulation of immune system process	10	A2M,ABCB5,ABL1,ACIN1,ACTB,ACTG1,ACTR2,ACVR1B,ACVR2A,ADAM10,ADAM8,ADK,ADORA2B,ANKRD17,ANXA1,AOC3,AP1G1,AP3B1,AQP3,ARF6,ARPC1B,ARPC2,ARPC4,ARRB2,ATP6AP1,AXL,BAIAP2,BCAR1,BCL2,BCL6,BLK,BLOC1S6,BST1,C1QA,C1QB,C1QC,C1S,C3,C5,C6,C7,C8A,C8B,C8G,CACNA1F,CACNB3,CAMK1D,CARD11,CARD9,CASP8,CBLB,CCL19,CCL2,CCL24,CCL3,CCL4,CCL7,CCL8,CCR6,CD14,CD180,CD19,CD2,CD209,CD226,CD247,CD27,CD274,CD276,CD37,CD38,CD3D,CD4…			GO: Biological Process	GO:0010648	negative regulation of cell communication	10	ACVR1C,ADAM17,ADAR,ADGRA2,AP2M1,ATF3,BMF,CALM2,CARD19,CAV1,CAV2,CAVIN3,CCL5,CHD8,CHRDL1,CHRDL2,CLOCK,CREB3,CREBRF,CRY1,CRYBA1,CSK,CTNNA1,CXXC4,CYLD,DAB1,DAB2,DAG1,DAPK1,DCN,DDIT3,DUSP10,DUSP8,DVL2,DYRK1A,ENPP1,ERBB3,ERBIN,EZR,FBN1,FBN2,FGF23,FMR1,FOXP1,FSTL3,FZD6,G2E3,GBP1,GCLM,GDPD5,GLG1,GRB10,HERPUD1,HIPK2,HMGB2,HTR2B,HTRA1,HYOU1,IGFBP1,IL1A,IL6,INHBA,ITPR1,KANK2,KCNQ1,KDM1A,KLF4,LATS2,LEF1,LGA…			GO: Biological Process	GO:0080135	regulation of cellular response to stress	10	AAAS,AKT1,AMBP,ANKRD6,APBB1,ARHGEF2,ARL6IP5,ARMT1,ATG7,ATP13A2,ATP6V0A1,ATP6V0A2,ATP6V0C,ATP6V0D1,ATP6V1B1,ATP6V1D,ATR,AXIN2,BABAM1,BABAM2,BAG2,BAG3,BAG4,BAK1,BAX,BBC3,BCAP31,BCL10,BCL2L1,BMP7,BRAF,BRSK2,CAMK2A,CAMK2D,CASP3,CAV3,CBS,CBX8,CCL19,CCL21,CD27,CD34,CEBPG,CHCHD2,CHEK1,CHMP4A,CHORDC1,CLN3,CNTF,COPS5,CREB3L1,CRHR2,CRY1,CRYAB,CSNK2A2,CTTN,DAB2IP,DACT1,DDX5,DEK,DERL2,DERL3,DHFR,DLG1,DNAJA1,…			GO: Biological Process	GO:0019637	organophosphate metabolic process	10	ABHD12,ABHD3,ABHD4,ACACA,ACACB,ACOT7,ACP6,ACPP,ACR,ACSL3,ACSL6,ADCY10,ADCY8,ADCY9,ADGRF5,ADK,ADORA2A,ADSSL1,AGPAT2,AGPAT5,AK1,AK5,AK8,AKAP5,ALDOC,AMBRA1,AMPD1,APLP1,APOA2,APOA5,APOC2,APRT,ARF1,ASPG,ATIC,ATP1A2,ATP1B1,ATP2B2,ATP5F1A,ATP5F1C,ATP5F1D,ATP5MC1,ATP5MC2,ATP5MF,ATP5MG,ATP5PB,ATP5PD,ATP5PF,ATP5PO,ATP6V0A2,ATP6V0A4,ATP6V1A,ATP6V1B2,BPGM,CAD,CALCA,CALM3,CANT1,CAP1,CARD11,CAT,CBS,CCL19,CCL21…			GO: Biological Process	GO:0007010	cytoskeleton organization	5.3939	ABLIM2,ABR,ACTA1,ACTG1,ACTN2,ADD1,ADD2,AGAP2,AGFG1,AKAP2,AKT1,ALDOA,ALMS1,AMOT,ANK3,ANKRD23,ANXA1,APC,AQP2,ARAP1,ARF1,ARHGAP28,ARHGAP6,ARHGEF10,ARHGEF18,ARHGEF19,ARHGEF5,ARMC4,ARPC1B,ARPC2,ARPC5,ARPIN,ASAP3,ASPM,ATAD1,ATF5,ATXN3,AURKA,AVIL,AXIN1,BAIAP2,BBS1,BBS2,BCAR1,BCL2,BICD2,BIN3,BIRC5,BLK,BMP10,BRCA2,BRSK1,BRSK2,CAP2,CAPN3,CAPZA2,CASP4,CASQ1,CASQ2,CAV1,CC2D2A,CCDC114,CCDC39,CCDC40,CCKAR,CCL1…			GO: Biological Process	GO:0006873	cellular ion homeostasis	10	ABCB6,ABCB7,ABCC2,ABCG2,ADCYAP1R1,ADRA1A,ADRA1B,ADRA1D,AGTR2,AKAP5,AKAP6,ALAS2,ANXA7,APLP2,APOE,ARF1,ASPH,ATOX1,ATP12A,ATP13A1,ATP13A2,ATP13A4,ATP1B2,ATP2A1,ATP2A2,ATP2A3,ATP2B3,ATP2C1,ATP2C2,ATP4A,ATP5F1B,ATP6V0A1,ATP6V0A4,ATP6V0B,ATP6V0C,ATP6V0D1,ATP6V0E1,ATP6V1B2,ATP6V1C1,ATP6V1C2,ATP6V1E1,ATP6V1F,ATP6V1H,AVPR1B,BBC3,BCAP31,BDKRB1,BDKRB2,BMP4,C1QTNF1,C7,CA7,CACNA1A,CACNA1C,CACNA1F,CACNA1I,CACN…			GO: Biological Process
GO: Biological Process	GO:0042330	taxis	5.68169	ACKR2,ADAM10,ADAM8,ALCAM,ANGPT1,ANXA1,APP,ARHGEF16,BCL11B,BDNF,CALCA,CCL18,CCL2,CCL23,CCL5,CDH13,CHN1,CKLF,CMTM4,CMTM7,CNR2,CNTN2,CORO1A,CORO1B,CX3CL1,CXCL10,CXCL11,CXCL13,CXCL17,CXCL8,CXCL9,CXCR2,DCC,DLX5,DOCK2,DPYSL2,DPYSL5,DSCAM,EDN2,EDNRB,EFNA3,EFNA4,EFNB2,ENPP2,EPHA5,ERBB2,ETV1,ETV4,EVL,EXT1,F7,FCER1G,FEZ1,FEZ2,FGF1,FLRT3,FMOD,FYN,FZD3,GFRA3,GLI2,GPC1,GREM1,HOXA1,IL12A,IL1B,IL6,ISL2,ITGA1,IT…			GO: Biological Process	GO:0051270	regulation of cellular component movement	10	AAMP,ABCC1,ABHD2,ABHD6,ABI3,ABL1,ACE,ACP5,ACTN1,ACVR1B,ACVRL1,ADAM10,ADAM15,ADAM8,ADAM9,ADARB1,AJUBA,ALOX12,ALOX15B,AMOT,ANGPT1,ANGPT2,ANGPT4,ANXA1,ANXA5,AOC3,APEX1,APOD,APOE,ARAP3,ARHGAP18,ARHGAP4,ARHGAP5,ARHGDIB,ARHGEF7,ARPC2,ATOH8,ATP1A1,BAG4,BCAR1,BCAS3,BCL2,BCL6,BCR,BRAF,BST2,C16orf45,C5,C5orf30,CAMK1D,CAPN7,CASQ2,CBLL1,CCDC39,CCDC40,CCL11,CCL19,CCL2,CCL24,CCL28,CCL3,CCL4,CCL7,CCL8,CCR6,CD27…			GO: Biological Process	GO:0033993	response to lipid	10	ABCA3,ABCG1,ACSL1,ACTA1,ADAM17,ADCYAP1,AKAP13,ALAD,ALDH3A1,ARID1A,BRCA2,BRINP3,CAD,CALM2,CARM1,CATSPERB,CAV1,CCL5,CLOCK,CPS1,CREBRF,CRY1,CTNNA1,CXCL11,CXCL2,CXCL5,DAB2,DCN,DNMT3B,DSG2,DUSP10,EEF2,EIF2AK2,ENDOG,EP300,ERBIN,ESRRG,FGF23,FOS,FOXP1,GABRB1,GAL,GATA4,GBP2,GCH1,GNPAT,HMGB2,HNRNPM,HNRNPU,IGF2R,IL6,INHBA,IRAK1,IRF8,KANK2,KLF4,KLF9,KLRK1,KRT19,LEF1,LOX,MAP7,MDK,MECP2,MED12,MED4,MSN,NCF2,NCL…			GO: Biological Process	GO:0002223	stimulatory C-type lectin receptor signaling pathway	10	BCL10,BTRC,CHUK,CLEC4E,CUL1,FCER1G,ICAM2,IKBKG,KLRK1,KRAS,LYN,MALT1,MAP3K7,NFKBIA,PAK1,PAK2,PAK3,PLCG2,PRKACA,PRKCD,PSMA1,PSMA2,PSMA3,PSMA4,PSMA5,PSMA6,PSMA7,PSMB1,PSMB10,PSMB2,PSMB3,PSMB4,PSMB5,PSMB6,PSMB7,PSMC2,PSMC3,PSMC4,PSMC5,PSMC6,PSMD10,PSMD11,PSMD12,PSMD13,PSMD14,PSMD2,PSMD3,PSMD6,PSMD7,PSMD8,PSMD9,PSME1,PSME4,PSMF1,RAF1,RELB,SKP1,SRC,SYK,TAB1,TAB2,UBA52,UBB,UBC,UBE2D1,UBE2V1			GO: Biological Process	GO:0051248	negative regulation of protein metabolic process	10	ABL1,ACE2,ADIPOQ,ADORA2A,AGO1,AGO4,AKAP1,AKT1,AMBP,ANAPC16,ANAPC2,ANAPC5,ANGPT1,ANKRD26,ANKS1A,APCS,APLP2,ARFGEF3,ARRB1,ASH1L,ATF3,ATF4,ATG5,ATG7,ATP13A2,ATRAID,AXIN1,AZIN2,BACE2,BAG5,BANK1,BAX,BCL2A1,BCOR,BDKRB1,BGN,BIRC6,BMP7,BST2,BTG2,BUB1,BUB3,C3orf33,C4BPB,C5,CALM3,CALR,CAV3,CD109,CD27,CD276,CD2BP2,CD44,CD59,CDC16,CDC26,CDC42SE1,CDK1,CDK2,CDK5,CDK5RAP1,CDKN1A,CDKN2C,CELF1,CELF4,CENPE,CEP192,…			Pathway	82928	Pentose phosphate pathway	4.08156	ALDOA,ALDOB,DERA,FBP1,FBP2,GLYCTK,GPI,H6PD,IDNK,PFKL,PFKM,PFKP,PGLS,PGM2,PRPS1,RBKS,RGN,RPIA,TALDO1,TKTL1			GO: Biological Process	GO:0055080	cation homeostasis	10	ABCB6,ABCB7,ABCG2,ADCYAP1R1,ADRA1A,ADRA1B,ADRA1D,AGTR2,AKAP5,AKAP6,ALAS2,ANK1,ANK3,ANPEP,ANXA7,APLP2,APOE,ARF1,ASPH,ATOX1,ATP12A,ATP13A1,ATP13A2,ATP13A4,ATP1B2,ATP2A1,ATP2A2,ATP2A3,ATP2B3,ATP2C1,ATP2C2,ATP4A,ATP4B,ATP5F1B,ATP6AP1,ATP6V0A1,ATP6V0A4,ATP6V0B,ATP6V0C,ATP6V0D1,ATP6V0E1,ATP6V1B2,ATP6V1C1,ATP6V1C2,ATP6V1E1,ATP6V1F,ATP6V1H,AVPR1B,AVPR2,BBC3,BCAP31,BDKRB1,BDKRB2,BMP4,C1QTNF1,C7,CA14,CA4,C…			GO: Biological Process
GO: Biological Process	GO:0006694	steroid biosynthetic process	5.60034	ABCB11,ACLY,AKR1C1,AKR1C2,AMACR,APOB,ATP1A1,BMP2,BMP5,CRH,CYB5R2,CYP27A1,CYP27B1,CYP46A1,CYP7A1,CYP7B1,DHCR7,ERLIN1,ERLIN2,FDFT1,FDPS,FDX1,FDXR,FGF1,FGF19,FGFR4,HINT2,HSD11B1,HSD17B1,HSD17B2,HSD17B4,HSD17B7,HSD3B2,HSD3B7,IGF2,IGFBP7,IL1B,INSIG1,LHCGR,LSS,NSDHL,PEX2,PROX1,RDH8,SF1,SNAI2,SRD5A1,SRD5A3,STAR,TRERF1			GO: Biological Process	GO:0051050	positive regulation of transport	10	ABAT,ABCA7,ABL1,ACAT2,ACHE,ACSL3,ACSL5,ACSL6,ACTL6A,ACVR2A,ADAM8,ADAM9,ADCYAP1R1,ADORA2B,AHSG,AK1,AKAP7,ALOX12B,ALOX15B,ANG,ANGPT1,ANKFY1,ANO1,ANXA1,AOC3,AP1G1,APBB1,APOA5,APOE,AQP2,ARHGEF5,ARHGEF7,ARPP19,ARRB2,ASIC2,ASPH,ATAD1,ATP13A2,ATP1B1,ATP1B2,ATP2B2,ATP2C2,ATP6AP1,ATP8A2,AXL,AZIN1,AZIN2,AZU1,BCAP31,BCAS3,BCL2,BCL2L11,BCR,BGLAP,BID,BIN1,BLK,BMF,BMP6,C1QTNF1,C3,C5,CACNA1D,CACNA1H,CACNA1I,CAC…			GO: Biological Process	GO:0016071	mRNA metabolic process	10	ADAR,AGO1,AUH,BTG2,CCNT1,CMTR2,CNOT4,CPSF7,DYRK1A,EIF4A1,EIF4G1,ELAVL1,ELAVL4,EXOSC10,FMR1,FUS,GRSF1,HNRNPA2B1,HNRNPH2,HNRNPM,HNRNPU,HSPA8,ISY1,LGALS3,LUC7L2,MBNL1,NCBP2,NONO,PAPOLA,PDCD7,PLRG1,POLDIP3,POLR2A,PPP4R2,PRPF8,PTBP1,PYM1,RBFOX2,RBM25,RNGTT,RPL13,RPL19,RPL23,RPL27,RPL27A,RPL3,RPL30,RPL31,RPL32,RPL37,RPL9,RPLP1,RPS12,RPS14,RPS19,RPS26,RPS6,RPS7,SFPQ,SLC39A5,SMG1,SNRNP200,SNRPB,SPEN,SRPK…			GO: Biological Process	GO:0051248	negative regulation of protein metabolic process	10	ABCA7,ACE2,ACOT8,ADAR,ADIPOQ,AGAP2,AGO2,AGO4,AGT,AHSG,AKAP1,AKT1,AMBP,ANAPC15,ANAPC16,ANAPC2,ANAPC4,ANAPC5,ANKRD26,ANKS1A,APBB1,APC,APLP2,APOD,AQP1,ARFGEF3,ARRB1,ASB1,ASH1L,ASPN,ATG14,ATG7,ATP13A2,ATP2B4,ATRAID,BAG4,BAK1,BANK1,BAX,BCL2A1,BCL2L1,BCL3,BDKRB1,BEX3,BGN,BIRC2,BIRC6,BMP4,BMP7,BUB1,C4BPA,C4BPB,CALM1,CALM2,CALR,CAPN3,CAPRIN1,CAPRIN2,CASP3,CASP8,CAV3,CBLC,CD27,CD2BP2,CD55,CDC16,CDC27,CDK1…			GO: Biological Process	GO:0061024	membrane organization	10	ABCA12,ACAA2,ACSL3,ADAM2,ADAM8,ADIPOQ,AFG3L2,AKAP8L,AKT1,ALKBH7,ANK1,ANKFY1,ANKRD27,ANKRD28,ANXA1,AP2M1,AP2S1,APOO,ARF1,ARHGEF16,ARHGEF9,ATG4A,ATG4C,ATG7,ATP10A,ATP1B1,ATP1B3,ATP8A1,ATP8B2,ATP8B3,ATP8B4,ATP9A,AZIN2,BAIAP2,BANF1,BAX,BBS2,BCL2A1,BCL2L11,BET1,BET1L,BIN2,BLOC1S2,BNIP1,BNIP3,BNIP3L,BRAF,BSG,C16orf70,CACNB1,CACNB3,CAMK2A,CAV3,CCL13,CCL2,CD2,CD59,CDAN1,CDK1,CDK5,CHMP1A,CHMP2B,CHMP4A,CHM…										GO: Biological Process	GO:0009725	response to hormone	10	AACS,ABCC2,ABCG1,ABCG2,ACACA,ACADS,ACAT1,ACR,ACSBG1,ACTN2,ACVR1,ADAMTS1,ADCY1,ADCY8,ADCY9,ADCYAP1R1,ADIPOQ,ADIPOR2,ADRA1A,ADRA1B,ADRM1,AGTR2,AGTRAP,AGXT,AHSG,AIFM1,AK2,AKAP8,AKR1C2,AKT2,AKT3,ALDH1A2,ALDOB,ALPL,ANG,ANXA3,AP3S1,APOA2,APOB,APOBEC1,AR,ARG1,ARNT2,ARSA,ARSB,ASS1,ATP2A1,ATP2A2,ATP6AP1,ATP6V0A1,ATP6V0A4,ATP6V0B,ATP6V0C,ATP6V0D1,ATP6V0E1,ATP6V1B2,ATP6V1C1,ATP6V1C2,ATP6V1E1,ATP6V1F,ATP6V1H…			GO: Biological Process
GO: Biological Process	GO:0046883	regulation of hormone secretion	5.59426	ADCYAP1,ADORA1,ANXA1,ARL2BP,ARNTL,ARRB1,ATG7,C1QTNF3,CACNA1E,CACNA2D2,CCKAR,CCKBR,CCL5,CLTRN,CNR1,CPT1A,CRH,EDN2,EPHA5,FGF23,FGFR4,FKBP1B,GHSR,GLUD1,GLUL,GPER1,GPR39,HADH,HNF4A,HTR2A,HTR2C,ICA1,IL11,IL1B,IL6,INHA,INHBB,IRS1,JAK2,KDM5B,LIF,MARCKS,MCU,NELL2,NEUROD1,NMU,NR0B2,NUCB2,OXCT1,PDE3B,PDE4C,PFKL,PHPT1,PLA2G6,PRKCA,PRKCE,PRKN,PTGS1,PTPN11,RAB11FIP1,RAB11FIP5,RBP4,REN,RETN,SCG5,SIRT3,SLC25A5,…			GO: Biological Process	GO:1901701	cellular response to oxygen-containing compound	10	ABCG2,ABL1,ACACA,ADAM9,ADAMTS1,ADCY2,ADCY3,ADCY8,ADCY9,ADNP2,ADRM1,AHSG,AIFM1,AKAP1,AKAP7,AKAP8,ALDH1A2,ALDOB,ANO1,ANXA1,ANXA5,AP3S1,APEX1,APLP1,APOB,APP,APPL1,APRT,AQP2,AQP4,AQP8,AQP9,ARG1,ARHGEF2,ATP2B4,ATP6AP1,ATP6V0A2,ATP6V0A4,ATP6V0C,ATP6V0D1,ATP6V0E1,ATP6V1B1,ATP6V1C1,ATP6V1E1,ATP6V1F,ATP6V1G3,AXL,BAIAP2,BAIAP2L1,BAIAP2L2,BCAR1,BGLAP,BIRC5,BMP6,BMP7,BNIP3,BRINP1,BRINP2,BRSK2,BYSL,CALCRL,CAM…			GO: Biological Process	GO:0033365	protein localization to organelle	10	ADAR,AP3B1,ARF6,ARL2BP,ATP5IF1,BBC3,BBS9,BCL2L11,BCL3,BMF,BRCA2,CAV2,CCT3,CCT7,CCT8,CD2AP,CPLANE1,CREB3,CYLD,DAB2,DAG1,DDX58,DYNLL1,EDAR,EHD1,EP300,EZR,FLNA,GBF1,HDGF,HES1,HK2,HNRNPM,HSP90AB1,HSPA8,HUWE1,IL6,IPO4,IPO5,IPO7,IPO8,KDELR1,KDELR2,KPNB1,LMNA,LZTS2,MFN2,MSN,MTX2,NAGPA,NEDD4,NUP205,NUP214,NUP54,NUP58,NUTF2,OPTN,PARK7,PARL,PDE2A,PDIA2,PEX6,PHIP,PINK1,PLRG1,PRDX1,RASSF5,RCC2,RDX,RPL13,RPL1…			GO: Biological Process	GO:0072503	cellular divalent inorganic cation homeostasis	10	ADCYAP1R1,ADRA1B,AGT,AGTR1,AKAP6,ASPH,ATP13A2,ATP2A1,ATP2B1,ATP2B3,ATP2B4,ATP2C1,ATP2C2,AVPR1A,AVPR1B,BAK1,BAX,BBC3,BCAP31,BDKRB1,BMP4,CACNA1C,CACNA1F,CACNA1G,CACNA2D1,CACNB3,CALCA,CALCR,CALM1,CALM2,CALR,CAMK2D,CAPN3,CASR,CAV3,CCKAR,CCL1,CCL11,CCL13,CCL19,CCL21,CCL23,CCL28,CCL3,CCL5,CCL8,CCR10,CCR9,CD19,CD38,CD40,CD55,CHERP,CHRNA7,CIB2,CLN3,CLSTN1,CORO1A,CRHR1,CTRC,CXCL10,CXCL11,CXCL13,CXCL9,CXCR…			GO: Biological Process	GO:0006753	nucleoside phosphate metabolic process	10	ACACA,ACACB,ACOT7,ACPP,ACR,ADCY10,ADCY8,ADCY9,ADK,ADORA2A,ADSSL1,AK1,AK5,AK8,AKAP5,ALDOC,AMPD1,APLP1,APRT,ATIC,ATP1A2,ATP1B1,ATP2B2,ATP5F1A,ATP5F1C,ATP5F1D,ATP5MC1,ATP5MC2,ATP5MF,ATP5MG,ATP5PB,ATP5PD,ATP5PF,ATP5PO,ATP6V0A2,ATP6V0A4,ATP6V1A,ATP6V1B2,BPGM,CAD,CALCA,CALM3,CANT1,CAP1,CARD11,CAT,CBS,CDA,CEP290,CMPK1,CNGB3,COX15,COX4I1,COX5A,COX5B,COX6B1,COX7A2L,COX7C,COX8A,CRH,CRHR1,CTNS,CXCL9,CXCR3,C…			Cluster [0.025:0.322]							GO: Biological Process	GO:0016477	cell migration	10	AAMP,ABCC1,ABHD6,ABI3,ACP5,ACTN4,ACVR1,ACVR1B,ACVRL1,ADAM10,ADAM15,ADAM17,ADIPOQ,ADORA3,AGTR2,AKT2,ALOX12,AMOT,AMOTL1,ANG,ANGPT4,ANXA3,APBB1,APBB2,APCDD1,APOB,APOD,APOE,APOH,ARF4,ARHGAP24,ARHGAP5,ARHGEF5,ARHGEF7,ARSB,ARX,ASPM,ATOH8,ATP1B2,ATP5F1B,B4GALT1,BCAR1,BCAS3,BCR,BDKRB1,BIN2,BMP2,BMP4,BMP5,BRAT1,BSG,BTG1,C16orf45,C1QBP,C5,C5AR2,CALCA,CAMK2D,CAP1,CBLL1,CCBE1,CCK,CCL1,CCL11,CCL16,CCL18,CCL19…			GO: Biological Process
GO: Biological Process	GO:0009611	response to wounding	5.57252	ABHD2,ACTB,ADAM15,ADAM8,ADCYAP1,ADORA1,ADORA3,AKAP10,ALOX15,ANXA1,AP3B1,APOD,ARFGEF1,ARRB1,ASIC2,B4GALT1,BCR,BLOC1S6,C1QTNF3,C3,C4BPA,C5orf30,C6orf89,C8A,CAPZB,CASK,CASP3,CBX5,CCL18,CCL2,CCL23,CCL5,CD28,CD34,CD44,CD47,CD9,CFP,CNR1,CNR2,COL3A1,COL5A1,CORO1B,CTSB,CTSS,CUEDC2,CX3CL1,DGKB,DGKE,DGKG,DOCK6,DYSF,EDNRB,ENTPD2,ERBB2,ERBB3,ERBB4,ESR1,ETS1,EVL,F10,F13B,F2RL2,F7,F8,F9,FAP,FBLN1,FCER1G,FIBP,F…			GO: Biological Process	GO:0010256	endomembrane system organization	10	A4GALT,AAAS,ABCA7,ACSL3,AGR2,AKAP8L,ALS2,ALS2CL,ANK1,ANO3,APPL1,ARF6,ARFGEF1,ARFGEF2,ARFRP1,ARHGEF7,ARL1,ARV1,ASNA1,ATL2,ATL3,ATP1B1,ATP2C2,ATP8B1,ATP8B3,ATP8B4,BAG4,BAG5,BAIAP2,BAIAP2L1,BAIAP2L2,BCAS3,BLZF1,BSG,C16orf70,CACNA1S,CACNB3,CALCR,CAV2,CAV3,CCNB1,CCNB2,CDAN1,CDC42,CDK1,CHMP1A,CHMP2A,CHMP2B,CHMP4B,CHMP4C,CHMP6,CHMP7,CIB1,CLTC,CNST,COL5A1,CRB1,CRB3,CREB1,CSNK1A1,DCHS1,DNAJC13,DNAJC28,DNM…			GO: Biological Process	GO:1902679	negative regulation of RNA biosynthetic process	5.99488	AIM2,ARID1A,ATAD2B,ATF3,BASP1,BAZ2A,BCL3,BHLHE40,BIRC5,BTG2,CAV1,CBFA2T2,CBX5,CCL5,CDKN1C,CHD8,CLOCK,CREBRF,CRY1,CXXC5,CYLD,CYP1B1,DAB2,DDIT3,DICER1,DNMT3B,E2F7,EFNA1,EHMT1,ELF3,ENO1,EP300,ERBIN,EZR,FLNA,FOXF2,FOXN3,FOXP1,FOXP4,FZD6,HDGF,HES1,HIC2,HIPK2,HMGA2,HMGB2,HNRNPA2B1,HSPA8,IFITM3,IKZF4,IRAK1,IRF8,JARID2,JAZF1,JDP2,KANK2,KDM1A,KDM5B,KLF4,KLF5,LEF1,LHX1,LIMS1,LMCD1,LOXL2,LRRFIP1,MDM4,MECP2,…			GO: Biological Process	GO:0072358	cardiovascular system development	10	AAMP,ACACB,ACADM,ACE,ACTA2,ACTC1,ACVR1,ADAM15,ADAM19,ADAM8,ADD1,ADGRB3,ADGRG1,ADORA2B,ADRA1B,AGGF1,AGT,AGTR1,AKAP6,AKT1,ALDH1A2,ALOX12,AMOT,ANGPT2,ANGPT4,ANPEP,ANXA3,AP1B1,AP2B1,APOB,APOD,AQP1,ARHGAP22,ARHGAP24,ASB4,ATG7,ATP5F1B,ATP5IF1,AXIN2,B9D1,BAK1,BASP1,BAX,BAZ1B,BBS7,BMP4,BMP7,BMPR2,BTG1,BVES,C1GALT1,C6,CACNA1C,CACYBP,CALCA,CALCRL,CALR,CAMK2D,CAMP,CASP3,CASP7,CASP8,CAV3,CBY1,CCDC39,CCL11,CC…			GO: Biological Process	GO:0032269	negative regulation of cellular protein metabolic process	10	ABL1,ACE2,ADIPOQ,ADORA2A,AGO1,AGO4,AKAP1,AKT1,AMBP,ANAPC16,ANAPC2,ANAPC5,ANGPT1,ANKRD26,ANKS1A,APLP2,ARFGEF3,ARRB1,ASH1L,ATF3,ATF4,ATG5,ATG7,ATP13A2,ATRAID,BAG5,BANK1,BAX,BCL2A1,BCOR,BDKRB1,BGN,BIRC6,BMP7,BST2,BTG2,BUB1,BUB3,C3orf33,C4BPB,C5,CALM3,CALR,CAV3,CD109,CD27,CD2BP2,CD44,CD59,CDC16,CDC26,CDC42SE1,CDK1,CDK2,CDK5,CDK5RAP1,CDKN1A,CDKN2C,CELF1,CELF4,CENPE,CEP192,CEP85,CFLAR,CHAC1,CHAD,CHP1,C…			Category	ID	Title (or Source)	Cluster logP	Cluster GeneSet			GO: Biological Process	GO:0019725	cellular homeostasis	10	AACS,ABCA12,ABCB6,ABCB7,ABCC2,ABCG2,ADCYAP1R1,ADD1,ADRA1A,ADRA1B,ADRA1D,AGTR2,AIFM1,AIFM3,AKAP5,AKAP6,ALAS2,ALDOA,ANO1,ANXA7,APLP2,APOE,AQP10,AQP2,AQP3,AQP4,AQP6,AQP8,AQP9,ARF1,ASPH,ATG7,ATOX1,ATP12A,ATP13A1,ATP13A2,ATP13A4,ATP1B2,ATP2A1,ATP2A2,ATP2A3,ATP2B3,ATP2C1,ATP2C2,ATP4A,ATP5F1B,ATP6V0A1,ATP6V0A4,ATP6V0B,ATP6V0C,ATP6V0D1,ATP6V0E1,ATP6V1B2,ATP6V1C1,ATP6V1C2,ATP6V1E1,ATP6V1F,ATP6V1H,AVPR1B,B…			GO: Biological Process
GO: Biological Process	GO:0048589	developmental growth	5.53689	ADAM15,ADRA1B,ALCAM,ANXA1,APBA2,APOD,APP,ARHGAP4,ATP8A2,ATRN,AZGP1,BDNF,BNC2,C3,CACNA2D2,CADM1,CGA,CHRNA1,CLIC4,COL9A1,CTDP1,CYFIP1,DBN1,DCC,DCLK1,DDR2,DHCR7,DISC1,DPYSL2,DSCAM,DUSP6,EIF2B2,ERBB4,ERCC2,ESR1,ETNK2,EVC,FDPS,FGF1,FGF13,FLRT1,FLRT3,FLT3,FLVCR1,FMOD,FOXO3,GAMT,GHSR,GINS1,GLI2,GRHL2,GSK3B,HDAC6,HHEX,HLA-A,HLX,HNRNPK,IGF2,IGSF10,IMPACT,KDF1,KDM5B,KIF26B,KMT2D,L1CAM,LATS2,LGMN,LRP4,MAEL,…			GO: Biological Process	GO:0080135	regulation of cellular response to stress	10	AAAS,ABL1,ABRAXAS1,ACTL6A,AGR2,AJUBA,AKT1S1,AMBP,ANKRD6,APBB1,APEX1,ARHGEF2,ARHGEF5,ARL6IP5,ARMT1,ARNTL,ATP13A2,ATP6V0A2,ATP6V0C,ATP6V0D1,ATP6V0E1,ATP6V1B1,ATP6V1C1,ATP6V1E1,AXIN2,BABAM1,BAG2,BAG3,BAG4,BAG5,BCAP31,BCL2L11,BCL6,BCLAF1,BDKRB2,BFAR,BIRC7,BMP7,BNIP3,BRAF,BRD4,BRSK2,CALCOCO2,CAMK2A,CAPNS1,CARD9,CASP3,CAV3,CBS,CCL19,CCN2,CD27,CD34,CD44,CD74,CDC42,CDC42SE1,CDK5,CDK6,CDKN2A,CEACAM1,CERS2…			GO: Biological Process	GO:0009790	embryo development	5.9734	ACVR1C,ADAR,ALDH1A3,ANKRD11,ARID1A,ARL13B,ATP5F1A,ATP6V1B1,ATP7A,BASP1,BCL10,BCL2L11,BIRC5,BRCA2,CACNA1C,CDKN1C,CELSR1,CHD7,CHD8,CKS2,COL12A1,COL5A1,CPLANE1,CXXC4,DAB2,DAG1,DDIT3,DICER1,DNMT3B,DSC3,DVL2,E2F7,EFNA1,EHMT1,ELF3,ENDOG,ENO1,EP300,FBN1,FBN2,FOXF2,FOXP4,FZD6,G2E3,GATA4,GRSF1,GTF2IRD1,HECTD1,HEG1,HES1,HIPK2,HMGA2,HOXB1,HS2ST1,HTR2B,INHBA,KDM1A,KDR,KIF1B,KLF2,KLF4,KRT19,LAMA5,LAMB1,LATS2,…			GO: Biological Process	GO:0061061	muscle structure development	10	ACADM,ACTC1,ACTG1,ACVR1,ADAM12,ADGRB3,AEBP1,AFG3L2,AGT,AKAP6,AKT1,ANKRD23,ARID5B,ASB2,ASS1,ATG7,AVPR1A,BARX2,BASP1,BCL9,BCL9L,BDNF,BIN1,BMP4,BNIP2,BTG1,BVES,CACNA1H,CACNA2D2,CACYBP,CALR,CAMK2D,CAPN3,CAPZB,CASP1,CAV3,CBY1,CCL17,CCM2L,CCN3,CCN4,CD53,CDH15,CDH2,CDK1,CDON,CENPF,CFL2,CFLAR,CHODL,CHRNA1,CHRNB1,CHRND,CHUK,CMTM5,CNTF,COL11A1,COL14A1,COL19A1,COL3A1,COPS2,CREB1,CRHR2,CRYAB,CSF1R,CSRP2,CTDP…			GO: Biological Process	GO:0009119	ribonucleoside metabolic process	10	ACACA,ACACB,ACOT7,ACPP,ADK,ADSSL1,AHCY,AHCYL1,AK1,AK5,ALDOC,APOBEC3A,APOBEC3C,APRT,ATP1A2,ATP1B1,ATP5F1A,ATP5F1C,ATP5F1D,ATP5MC1,ATP5MC2,ATP5MF,ATP5MG,ATP5PB,ATP5PD,ATP5PF,ATP5PO,ATP6V0A2,ATP6V0A4,ATP6V1A,ATP6V1B2,BPGM,CAD,CARD11,CDA,CMPK1,COX15,COX4I1,COX5A,COX5B,COX6B1,COX7A2L,COX7C,COX8A,CTNS,CYC1,DCAKD,DGUOK,DLG1,DLG3,DLG4,DNAJC15,DNMT3B,EIF6,ENO1,ENO3,ENTPD5,FBP1,FXN,GADD45GIP1,GALE,GALT,GAM…			GO: Biological Process	GO:1901699	cellular response to nitrogen compound	10	AANAT,ABL1,ADAR,ADCY1,ADCY4,ADCY6,AGTR1,AGTRAP,AIFM1,AKAP6,AKAP9,AKT2,AOC1,APEX1,APLP1,APRT,AQP1,AQP8,ARHGEF2,ATP2B4,ATP6AP1,ATP6V0A1,ATP6V0C,ATP6V0E1,ATP6V1A,ATP6V1B1,ATP6V1B2,ATP6V1C2,ATP6V1F,ATP6V1G1,ATP6V1G3,BAD,BAIAP2L1,BAIAP2L2,BGLAP,CAMK2A,CCL2,CCNA2,CDK2,CEACAM1,CHRM2,CHRM5,CIB2,CISH,COL16A1,COL1A1,COL1A2,COL4A1,COL4A6,COL6A1,CPS1,CTNNA1,CTNNB1,CYBA,CYP11B1,CYP11B2,DDC,DENND4C,DICER1,DNM2…			GO: Biological Process	GO:0005975	carbohydrate metabolic process	10	ADAMTS13,ADAMTS7,ADAMTSL1,ADAMTSL4,ADCYAP1R1,ADIPOQ,ADPGK,ADRA1B,ADRB3,AKR1A1,AKR7A2,AKT2,ALDH1A1,ALDH2,ALDOA,ALDOB,ALG1,ALG10,ALG12,ALG3,ALG9,AMDHD2,ANGPTL8,AP2A1,APOD,ARF4,ARFGEF1,ARPP19,ART1,ART3,ART4,ART5,ATF4,ATP4B,B3GALNT2,B3GALT2,B3GALT5,B3GAT1,B3GNT4,B3GNT6,B3GNT7,B3GNT8,B3GNT9,B4GALNT1,B4GALT1,B4GALT3,B4GALT5,B4GALT6,B4GALT7,BRAT1,C1QTNF1,C1QTNF2,C20orf173,CACNA1A,CALM3,CBFA2T3,CD244,CHI…			GO: Biological Process
GO: Biological Process	GO:0045666	positive regulation of neuron differentiation	5.4507	ACTR3,ADCYAP1,AKAP5,ANKRD27,ATF1,ATP8A2,AVIL,BAIAP2,BDNF,BMP2,BMP5,CCL5,CNR1,CUL7,CUX1,DBN1,DCC,DISC1,DKK1,DSCAM,EIF2B2,EPOR,ETV5,FEZ1,FIG4,FKBP1B,FYN,GLI2,GPRC5B,GSK3B,HEYL,HNRNPK,IL1RAP,IL1RAPL1,IL6,IMPACT,ITGA3,KDM4A,KIF3C,L1CAM,LIF,LPAR1,LRRC7,MAP1B,MAP2K2,MAPK6,MARCKS,MEF2C,MEGF8,NEUROD1,NIN,NKX2-5,NPTN,NRG1,NTRK2,NTRK3,NUMBL,PALM,PLXNB1,PPP1R9A,PPP2R5B,PRKN,PROX1,PSEN1,PTK7,PTPRD,PTPRF,RAB1…			GO: Biological Process	GO:0040007	growth	10	ABL1,ACACB,ACTL6A,ACVR1B,ACVRL1,ADAM10,ADAM15,ADNP,ADNP2,ADRA1B,ADRB3,AES,AFG3L2,AGR2,AHSG,ALKBH1,ALMS1,ALOX12,ALOX15B,AMH,ANAPC2,ANKRD11,ANXA1,APBA2,APBB1,APBB2,APOA5,APOD,APOE,APP,ARHGAP4,ARHGEF11,ARX,ASPM,ATP6V0E1,ATP8A2,ATRN,AURKA,AZGP1,BCAR1,BCL2,BCL2L11,BCL6,BLZF1,BMP6,BMP7,BNC2,BNIPL,BRAT1,BST2,C3,CACNA1A,CAPRIN2,CARM1,CAV3,CCL11,CCM2,CCN2,CCN4,CCN6,CCNB1,CCNB2,CD38,CD44,CD81,CDA,CDC42,CDH…			GO: Biological Process	GO:0044265	cellular macromolecule catabolic process	5.96501	ADAMTS7,AGO1,ATP5IF1,ATXN3,AUH,BTG2,CAV1,CD2AP,CLOCK,CNOT4,CYLD,DAB2,DDIT3,DENND3,DICER1,DNAJB9,DNAJC3,DTL,DYNC1LI1,EDEM2,EIF4A1,EIF4G1,ENDOG,EXOSC10,EZR,FAP,FBXL3,FBXO10,FMR1,HECTD1,HERPUD1,HMGB2,HSP90AB1,HSP90B1,HUWE1,ISG15,KPNB1,MARCH6,MSN,NCBP2,NEDD4,NPLOC4,PABPC4,PARK7,PDCD6IP,PINK1,PLK2,PSMA5,PSMA7,PSMB2,PSMB4,PSMB6,PSMD5,PSME4,PTBP1,PYM1,RDX,RIC1,RNF111,RNF144A,RNF213,RNF6,RPL13,RPL19,RPL2…			GO: Biological Process	GO:0009119	ribonucleoside metabolic process	10	ABHD14B,ACACA,ACACB,ADK,ADSS,AHCY,AHCYL1,AHCYL2,AK1,ALDOA,ALDOC,AMPD2,AMPD3,APOBEC2,APOBEC3G,APRT,ATP5F1A,ATP5F1B,ATP5F1C,ATP5F1D,ATP5IF1,ATP5MC1,ATP5MC2,ATP5MC3,ATP5MF,ATP5MG,ATP5PB,ATP5PD,ATP5PF,ATP6V0A1,ATP6V0A2,ATP6V1B1,BDNF,BHMT,BHMT2,CASK,CDA,COASY,COQ7,COQ9,COX15,COX4I1,COX5A,COX5B,COX6B1,COX7B,COX7C,CROT,CTPS1,CTPS2,CYC1,CYCS,DHODH,DLG1,DLG2,DLG4,DMAC2L,DNM1L,DNMT3A,ECD,EIF6,ENO1,ENO2,ENO…			GO: Biological Process	GO:0022411	cellular component disassembly	10	ACIN1,ADAM10,ADAM15,ADAM8,ADD1,ADD2,AKAP5,AKAP8L,AMBRA1,ANXA5,APAF1,AQP2,ASB2,ATG12,ATG13,ATG4A,ATG4C,ATG5,ATG7,ATP13A2,ATP1B1,AVIL,AXIN1,BANF1,BAX,BMX,BNIP3,BNIP3L,BOC,BSG,C16orf45,C5,CA7,CAPG,CAPNS1,CAPZB,CD44,CD93,CDC37,CDK1,CEBPG,CFL1,CHAF1B,CHCHD1,CHMP1A,CHMP2B,CHMP7,CHST3,CLVS1,CMA1,CNEP1R1,COX8A,CST3,CTSG,CTSS,CTSV,CTTN,DBNL,DCN,DDR2,DEDD2,DENR,DFFA,DKKL1,DMTN,DNASE1L3,DNASE2,DSTN,DVL2,DZA…			GO: Biological Process	GO:0010243	response to organonitrogen compound	10	AANAT,AARS,ABAT,ABL1,ACVR1C,ADCY1,ADCY4,ADCY6,AGTR1,AGTRAP,AIFM1,AKAP6,AKAP9,AKT2,AOC1,APEX1,APLP1,APRT,AQP1,AQP8,ARHGEF2,ASCL1,ATP2A1,ATP2A2,ATP2B4,ATP6AP1,ATP6V0A1,ATP6V0C,ATP6V0E1,ATP6V1A,ATP6V1B1,ATP6V1B2,ATP6V1C2,ATP6V1F,ATP6V1G1,ATP6V1G3,AVPR1A,AVPR1B,AVPR2,BAD,BAIAP2L1,BAIAP2L2,BGLAP,BIRC2,BMP7,BRAF,BTG2,CACYBP,CAD,CALM2,CALM3,CAMK2A,CARM1,CBS,CCL2,CCNA2,CCND3,CDK1,CDK2,CDKN1B,CDO1,CEACAM1…			GO: Biological Process	GO:0048870	cell motility	10	AAMP,ABCC1,ABHD6,ABI3,ACP5,ACTN4,ACVR1,ACVR1B,ACVRL1,ADAM10,ADAM15,ADAM17,ADIPOQ,ADORA3,AGTR2,AKT2,ALOX12,AMOT,AMOTL1,ANG,ANGPT4,ANXA3,APBB1,APBB2,APCDD1,APOB,APOD,APOE,APOH,ARF4,ARHGAP24,ARHGAP5,ARHGEF5,ARHGEF7,ARSB,ARX,ASPM,ATOH8,ATP1B2,ATP5F1B,B4GALT1,BCAR1,BCAS3,BCR,BDKRB1,BIN2,BMP2,BMP4,BMP5,BRAT1,BRK1,BSG,BTC,BTG1,C16orf45,C1QBP,C5,C5AR2,CACNA1I,CALCA,CAMK2D,CAP1,CATSPER3,CATSPERD,CBLL1,CCB…			GO: Biological Process
GO: Biological Process	GO:0006897	endocytosis	5.42662	ABCA7,ACKR2,ACTB,ACTR3,ADORA1,ALOX15,ANGPT1,ANXA1,AP1S1,APOB,APOBR,APP,ARHGAP21,ARPC1B,ARPC2,ARR3,ARRB1,ATG7,BAIAP2,BCR,BICD1,C3,C4BPA,CALCA,CAV2,CBL,CCL2,CD247,CD2AP,CD302,CD47,CD9,CD93,CDC42SE2,CDH13,CEBPE,CLN3,CLTC,CNTN2,CORO1A,CRK,CXCL8,CXCR2,CYBA,CYFIP1,DKK1,DNM1L,DOCK2,DPYSL2,EIF2AK1,ENPP2,ENPP3,FCER1G,FCGR3A,FCHO1,FCN1,FNBP1L,FYN,GREM1,GRIA2,GRK3,GULP1,HBA1,HBB,HNRNPK,HOOK2,HSP90B1,HYOU1,I…			GO: Biological Process	GO:0022411	cellular component disassembly	10	A2M,AAAS,ACAN,ACIN1,ACTL6A,ADAM10,ADAM15,ADAM8,ADAMTS7,ADD2,AIFM1,AKAP8L,ANXA5,APAF1,APEH,AQP2,ARHGEF2,ARID1A,ARID2,ASB2,ASPH,ATG14,ATG2B,ATG4A,ATG4D,ATG9A,ATP13A2,ATP1B1,AVIL,BCAP31,BMP1,BNIP3,BOC,BSG,C16orf45,C5,CA7,CAPNS1,CAPS,CAPZA2,CAPZB,CASP3,CASP6,CASP7,CASP8,CCNB1,CCNB2,CD44,CD93,CDK1,CDKN2A,CHAF1B,CHMP1A,CHMP2A,CHMP2B,CHMP7,CHST3,CIB1,CLSPN,CLVS1,CMA1,COX8A,CSNK1A1,CSPG5,CST3,CTNNB1,CTSG…			GO: Biological Process	GO:1903844	regulation of cellular response to transforming growth factor beta stimulus	5.96238	ADAM17,CAV1,CAV2,CDKN1C,DAB2,FBN1,FBN2,GLG1,HIPK2,HTRA1,MTMR4,MYOCD,ONECUT2,PDPK1,RNF111,SIRT1,SMAD7,SNX25,STRAP,TGFB3,TGFBR2,TGFBR3,TRIM33			GO: Biological Process	GO:0099537	trans-synaptic signaling	10	ABAT,ADGRL1,ADIPOQ,ADNP,ADORA1,AGT,AKAP9,AKT1,ALS2,AMPH,ANAPC2,APBA1,APBA2,ARF1,ASIC1,ATAD1,BAIAP3,BCAN,BDNF,BRAF,CA7,CACNA1B,CACNA1C,CACNA1E,CACNA1G,CACNA2D2,CACNB1,CACNB2,CACNB3,CACNG3,CACNG4,CADPS,CADPS2,CAMK2A,CAMK4,CASK,CCL13,CD38,CEL,CELF4,CHRM2,CHRNA1,CHRNA2,CHRNA3,CHRNA4,CHRNA6,CHRNA7,CHRNB1,CHRNB2,CHRNB3,CHRNB4,CHRND,CHRNE,CHRNG,CLSTN1,CLSTN2,CNIH2,CNIH3,CNP,CNR1,CNR2,CNTN2,CNTNAP4,CPLX2…			GO: Biological Process	GO:0007167	enzyme linked receptor protein signaling pathway	10	ABI1,ABL1,ACTB,ACTG1,ACTR3,ACVR1B,ACVR2A,ADAM10,ADAMTSL2,ADIPOQ,ADRM1,AFAP1L2,AFP,AHI1,AKAP4,AKT1,ANGPT1,ANGPT2,ANGPT4,ANKRD26,ANKS1A,AP2A1,AP2A2,AP2M1,AP2S1,AP3S1,APH1A,APLP2,ARAP1,ARF4,ARHGEF7,ARPC1B,ARPC2,ARPC4,ARPC5,ATOH8,ATP6AP1,ATP6V0A2,ATP6V0A4,ATP6V0B,ATP6V0C,ATP6V0D1,ATP6V1A,ATP6V1B2,ATP6V1F,AXIN1,BAIAP2,BCAR1,BCL9L,BLK,BMP3,BMP5,BMP6,BMP7,BMP8B,BMPR1B,BMX,BRK1,CAMLG,CAV3,CCL13,CCL2,CCN2…			GO: Biological Process	GO:0010038	response to metal ion	10	AANAT,ABAT,ACER1,ACO1,ACP5,ADAM9,ADCY1,ADGRV1,ALB,ALG2,ALOX5AP,ANXA11,ANXA7,AOC1,AQP1,AQP3,ASCL1,ATF1,ATP13A2,ATP5F1D,BAD,BECN1,BGLAP,BMP6,BRAF,C3,CACNA1G,CACNA1H,CALM2,CALM3,CALR,CAMK2B,CASP9,CD14,CD86,CDK1,CDK2,CDK4,CDKN1B,CLIC4,CNGA3,CP,CPNE2,CPNE6,CPOX,CPS1,CRIP1,CRP,CTNNB1,CUTA,CYBRD1,CYP11B1,CYP11B2,CYP2A13,CYP2A6,CYP2A7,DNMT1,DNMT3A,DPEP1,DRD2,ECE1,EEF2K,EGFR,EIF2AK3,ENDOG,ENTPD6,FGA,FN1,F…			GO: Biological Process	GO:0051094	positive regulation of developmental process	10	ACHE,ACIN1,ACSL6,ACVR1,ACVR1B,ACVRL1,ADAMTS1,ADAMTS20,ADD1,ADGRB1,ADGRB2,ADGRL1,ADGRL2,ADIPOQ,ADIRF,ADM2,AGR2,AGTR2,AKAP5,AKAP6,ALOX12,AMELX,AMOT,ANAPC2,ANGPT4,ANKRD27,ANKRD54,ANXA3,APBB1,APOB,APOE,AR,ARF1,ARHGAP35,ARHGEF7,ARSB,ARX,ASB4,ASIC2,ASPA,ASPM,ATOH8,ATP11C,ATP6AP1,ATRAID,AXIN2,B4GALT1,BAIAP2,BASP1,BCL11A,BIN1,BMP1,BMP2,BMP4,BMP5,BMP7,BMPR1A,BMPR1B,BOC,BRINP2,BTC,BTG1,BTK,C1QBP,C5,CALCA,C…			GO: Biological Process
GO: Biological Process	GO:0018212	peptidyl-tyrosine modification	5.41843	ABI2,ADORA1,ALK,ANGPT1,APLP2,APP,ARL2BP,BCR,CAV2,CCK,CCL5,CD44,CRLF1,CSPG4,CTF1,CUX1,DDR2,DYRK3,DYRK4,EGF,ENPP2,EPHA5,EPHA6,EPHB4,ERBB2,ERBB3,ERBB4,ERLIN2,FBXW7,FGF1,FGF23,FGF3,FGFR1OP,FGFR4,FLT3,FLT4,FRK,FYN,GPRC5B,GREM1,HK1,HNF4A,HTR2A,IFNAR1,IGF2,IL11,IL12A,IL18,IL5,IL6,JAK2,JAK3,LCK,LIF,LRP4,LRRK1,MAP2K2,MAP2K5,MATK,MST1R,NPTN,NRG1,NRG2,NTRK2,NTRK3,PAK2,PDGFA,PDGFRA,PPP2R1A,PPP2R5B,PRAG1,PRKC…			GO: Biological Process	GO:0007167	enzyme linked receptor protein signaling pathway	10	ABL1,ACTB,ACTG1,ACTR2,ACVR1B,ACVR2A,ACVRL1,ADAM10,ADAM9,ADAMTS3,ADAMTSL2,ADRM1,AGR2,AHSG,AKAP3,AKAP4,AKAP7,AKT1S1,ALK,ANGPT1,ANGPT2,ANGPT4,AP2A1,AP2A2,AP2B1,AP3S1,APOD,APP,APPL1,ARHGEF7,ARPC1B,ARPC2,ARPC4,ARRB2,ASPN,ATOH8,ATP6AP1,ATP6V0A2,ATP6V0A4,ATP6V0C,ATP6V0D1,ATP6V0E1,ATP6V1B1,ATP6V1C1,ATP6V1E1,ATP6V1F,ATP6V1G3,ATXN7,AXL,BAIAP2,BAIAP2L1,BAIAP2L2,BCAR1,BCL9L,BCR,BDKRB2,BLK,BMP1,BMP15,BMP6,BMP…			GO: Biological Process	GO:0017015	regulation of transforming growth factor beta receptor signaling pathway	5.96238	ADAM17,CAV1,CAV2,CDKN1C,DAB2,FBN1,FBN2,GLG1,HIPK2,HTRA1,MTMR4,MYOCD,ONECUT2,PDPK1,RNF111,SIRT1,SMAD7,SNX25,STRAP,TGFB3,TGFBR2,TGFBR3,TRIM33			GO: Biological Process	GO:0030001	metal ion transport	10	ACE,ADCYAP1R1,ADORA1,AGT,AHCYL1,AKAP6,AKAP7,AKAP9,AKT1,AKT3,AP3B1,AQP1,AQP2,ARF1,ASIC1,ASIC3,ASPH,ATOX1,ATP1B2,ATP1B3,ATP1B4,ATP2A1,ATP2B1,ATP2B3,ATP2B4,ATP2C1,ATP2C2,ATP4B,ATP6AP1,ATP6V0A1,ATP6V0A2,ATP6V0C,ATP6V0D1,ATP6V1B1,ATP6V1D,ATP6V1G3,BAK1,BAX,BBC3,BDKRB1,BEST1,BMP4,CACNA1B,CACNA1C,CACNA1E,CACNA1F,CACNA1G,CACNA1H,CACNA2D1,CACNA2D2,CACNA2D4,CACNB1,CACNB2,CACNB3,CACNG1,CACNG3,CACNG4,CALCA,CA…			GO: Biological Process	GO:0042278	purine nucleoside metabolic process	10	ACACA,ACACB,ACOT7,ACPP,ADK,ADSSL1,AHCY,AHCYL1,AK1,AK5,ALDOC,APRT,ATP1A2,ATP1B1,ATP5F1A,ATP5F1C,ATP5F1D,ATP5MC1,ATP5MC2,ATP5MF,ATP5MG,ATP5PB,ATP5PD,ATP5PF,ATP5PO,ATP6V0A2,ATP6V0A4,ATP6V1A,ATP6V1B2,BPGM,CARD11,COX15,COX4I1,COX5A,COX5B,COX6B1,COX7A2L,COX7C,COX8A,CTNS,CYC1,DCAKD,DGUOK,DLG1,DLG3,DLG4,DNAJC15,DNMT3B,EIF6,ENO1,ENO3,ENTPD5,FBP1,FXN,GADD45GIP1,GALE,GALT,GAMT,GCK,GPHN,GPI,HIF1A,HK1,HK2,HSP…			GO: Biological Process	GO:0071216	cellular response to biotic stimulus	10	ABL1,ADAM9,AICDA,AKAP8,BMP6,BTK,CCDC47,CCL2,CCL20,CD14,CD36,CD40,CD6,CD84,CD86,CDK19,CLEC7A,CSF3,CTR9,CX3CR1,CXCL16,CYP17A1,EIF2AK3,EME1,ENTPD2,FBH1,FCGR2B,FN1,FZD5,GBP2,GBP6,GFI1,GSK3B,GSTP1,HAVCR2,HIF1A,HMGCS2,ICAM1,IL12B,IL1B,IL2,IL24,IRAK1,IRAK2,IRF3,IRF8,KLRK1,LBP,LILRB1,LILRB2,LITAF,LTC4S,LTF,LY86,LY96,MAPK9,MEF2C,MIF,NFKB1,NFKBIA,NLRP3,NOS3,NR1D1,OGT,P2RY2,PAF1,PDE4B,PLAU,PPARD,PPARGC1A,PR…			GO: Biological Process	GO:0006936	muscle contraction	10	ABAT,ACTA2,ACTN2,ADORA2B,ADRA1A,ADRA1B,ADRA1D,AKAP6,ALDOA,ARHGEF11,ASPH,ATP2A1,ATP2A2,BDKRB2,CACNA1C,CACNA1H,CACNA1S,CACNA2D1,CACNB2,CALCA,CALM3,CAMK2D,CASQ1,CASQ2,CHGA,CHRM2,CHRM3,CHRNA1,CHRNA3,CHRNB1,CHRNB2,CHRND,CHRNG,CHUK,CKMT2,CLCN1,CLIC2,CNN1,CRYAB,CTNNA3,DAPK3,DES,DLG1,DMD,DMPK,DRD1,DSG2,DTNA,DYSF,EDN2,EDNRA,EDNRB,F2R,FGF12,FKBP1A,FLT1,FXYD1,GAA,GALR2,GAMT,GHSR,GJA5,GJC1,GNAO1,GRIP2,GRK2,G…			GO: Biological Process
GO: Biological Process	GO:0030155	regulation of cell adhesion	5.4071	ADAM10,ADAM15,ADAM8,ADAM9,ALOX15,ANGPT1,ANXA1,AP3B1,APOD,ARHGDIB,ARPC2,BAG4,BCL10,BLM,BMP2,CASK,CASP3,CCL2,CCL5,CD2,CD247,CD28,CD3D,CD44,CD47,CD83,CD86,CDH13,CELSR2,CITED2,COL16A1,CORO1A,CX3CL1,CXCL13,CXCL8,CYTIP,DBN1,DISC1,DSCAM,EBI3,ECM2,EDIL3,EFNB2,EGFLAM,EMP2,ENPP2,EPHA5,EPHB4,ERBB2,ERBB3,ETS1,FADD,FBLN1,FLNA,FLOT2,FXYD5,FYN,FZD4,GLI2,GREM1,GSK3B,HLA-A,HLX,IGF2,IL12A,IL18,IL1B,IL20RB,IL36B,IL…			GO: Biological Process	GO:0001932	regulation of protein phosphorylation	10	ABCA7,ABL1,ACE,ACE2,ACSL1,ACVR1B,ACVR2A,ACVRL1,ADAM8,ADAM9,ADARB1,ADCY2,ADCY3,ADCY8,ADCY9,ADNP,ADORA2B,ADRA1B,ADRB3,AHSG,AJUBA,AKAP8,AKAP8L,AKT1S1,ALK,ALOX12B,ALS2,AMBP,ANAPC10,ANG,ANGPT1,ANGPT4,ANKRD6,APIP,APOE,APP,ARHGEF2,ARHGEF5,ARL6IP5,ARRB2,ASH1L,ASPN,ATG14,ATP2B4,ATP6AP1,ATP6AP2,AXIN2,AZU1,BAG4,BANK1,BCAR3,BCL2,BDKRB2,BGN,BIRC7,BMP1,BMP15,BMP6,BMP7,BRAF,BRAT1,BRD4,C1QTNF1,C3,C3orf33,C5,CAB3…			GO: Biological Process	GO:1901215	negative regulation of neuron death	5.95241	AARS,ABCC1,ATF4,ATP7A,BIRC5,BTG2,CCL5,CD34,ERBB3,GCLM,HIPK2,HSP90AB1,HYOU1,IL6,ITPR1,KDR,LRP1,MDK,MECP2,MSH2,NDNF,NEO1,NGFR,NONO,NR4A2,OPTN,PARK7,PDPK1,PINK1,RASA1,REL,SIRT1,STAT3,TGFB3,UNC5B			GO: Biological Process	GO:0097305	response to alcohol	10	AACS,AANAT,ABAT,ABCA1,ACP5,ACTC1,ADCY7,ADCYAP1R1,ADH6,ADIPOQ,AGTR1,AIFM1,ALAD,ALDH1A2,ALPL,ANXA1,APC,AQP1,ARG1,ARSA,ASS1,ATP2B1,ATP5MC3,AVPR1A,BAK1,BAX,BCL2L1,BIRC2,BLM,BMP4,BMP7,BRCA2,CACNA1B,CALM1,CALM2,CALR,CASP3,CASP8,CAT,CBX3,CCDC62,CCL3,CCL5,CCND1,CD14,CD27,CD38,CDK1,CDKN1A,CDO1,CHRNA7,CHRNB2,CNR1,COL1A1,CRH,CRHBP,CRHR1,CRYAB,CTNNA1,CTSB,CXCL10,CYP1A2,CYP7A1,DMAP1,DNMT3A,DRD1,DRD2,DRD4,EEF1…			GO: Biological Process	GO:0010608	posttranscriptional regulation of gene expression	10	A1CF,AARS,ACE,ACO1,ADAD1,AGO1,AGO4,AKT1,ANGEL2,APLP1,ATF4,ATXN2,AXIN2,BANK1,BRF1,BTG2,C1QBP,CALR,CARHSP1,CCL5,CD28,CDC37,CDK5RAP1,CELF1,CELF4,CNOT1,CNOT11,CNOT7,CNOT8,CNOT9,COA3,CTIF,DAPK1,DAPK3,DAZL,DDX1,DDX6,DHX9,DNAJC1,DTD1,EEF2,EEFSEC,EGFR,EIF1,EIF1B,EIF2A,EIF2AK3,EIF2B1,EIF2B2,EIF2B3,EIF2B4,EIF2B5,EIF3B,EIF3E,EIF3G,EIF3H,EIF3I,EIF3J,EIF3K,EIF3L,EIF3M,EIF4A1,EIF4E,EIF4E3,EIF4EBP1,EIF4ENIF1,EI…			GO: Biological Process	GO:0016053	organic acid biosynthetic process	10	ABAT,ABCB11,ACACA,ACADL,ACADVL,ACOT8,ACSM1,ACSM3,ACSS1,ACSS2,ADI1,AGXT2,AKR1A1,AKR1D1,ALDH18A1,ALDH1A1,ALDH1A2,ALDH1A3,ALDH4A1,ALDH9A1,ALOX12B,ALOX15B,ALOX5,ALOX5AP,ALOXE3,AMACR,APOA5,ASL,ASPA,ATIC,ATP2B4,ATP5IF1,AVPR1A,BCAT1,CAD,CBS,CD74,CDO1,CEACAM1,CPS1,CTH,CYP27A1,CYP39A1,CYP46A1,DECR2,DEGS1,DHRS9,EIF2B1,EIF2B2,ELOVL1,ELOVL2,ELOVL3,ELOVL5,ELOVL6,ENOPH1,ERLIN1,ERLIN2,FADS1,FADS2,FADS6,FCER1A,F…			GO: Biological Process	GO:0060322	head development	10	ABAT,ABCB6,ACAT1,ACSL3,ACTB,AFDN,AFF2,AGTPBP1,AGTR2,AK2,AK4,AK7,AK8,AKAP5,ALDH1A2,ANKRD11,ANXA3,APAF1,APLP1,APLP2,APOD,ARF4,ARHGAP35,ARMC4,ARNT2,ARX,ASPH,ASPM,ATF5,ATG7,ATP6V0D1,ATXN2,AVPR2,BAG3,BASP1,BCR,BMP2,BMP4,BMPR1A,BOK,BRCA2,C16orf45,CACNA1A,CALM3,CASP2,CBS,CCDC14,CD27,CDC42,CDH1,CDH22,CDK5,CDK5R1,CDK5RAP2,CDK5RAP3,CEP120,CERS1,CHD5,CHD8,CHRD,CHRNB2,CITED1,CKB,CLDN5,CMA1,CNP,CNTN1,CNTN2,CN…			GO: Biological Process
GO: Biological Process	GO:0001944	vasculature development	5.38865	ACTA2,ADAM15,ADAM8,ADAMTS6,ANGPT1,ANKRD17,ANPEP,APOB,APOD,ARID1A,B4GALT1,BTG1,C1GALT1,C3,CALCA,CAMP,CCL2,CCL5,CD34,CDH13,CDH2,CDH5,CITED1,CITED2,CLIC4,COL15A1,COL3A1,COL4A1,COL4A2,COL5A1,CSPG4,CUL7,CX3CL1,CXCL10,CXCL13,CXCL17,CXCL8,CXCR2,DCTN5,DHCR7,DLL4,ECM1,EFNB2,EGF,EGLN1,EMP2,ENPP2,EPC1,EPHB4,EPOR,ERBB2,ESM1,ETS1,ETV2,FAP,FBXW7,FGF1,FLNA,FLT4,FLVCR1,FZD4,GATAD2A,GJC1,GPER1,GPI,GREM1,HEY1,HHEX…			GO: Biological Process	GO:0009611	response to wounding	10	A2M,ABAT,ABHD2,ACE,ACE2,ACHE,ACP5,ACTB,ACTG1,ACTN1,ACVRL1,ADAM15,ADAM8,ADORA2B,AHSG,AJUBA,AK3,AKAP1,AKAP10,ALOX12,ALOX5AP,ANXA1,ANXA5,AOC3,AP3B1,APOA5,APOD,APOE,ARFGEF1,ARG1,ARHGAP24,ARHGEF19,ARRB2,ASH1L,ASIC2,AXL,BCL2,BCL6,BCR,BLOC1S6,BRAF,BRD4,C1GALT1C1,C1QTNF1,C3,C5,C5orf30,C6,C6orf89,C7,C8A,C8B,C8G,CALCRL,CAPZA2,CAPZB,CASK,CASP1,CASP3,CASP4,CAV3,CCL1,CCL11,CCL16,CCL18,CCL2,CCL24,CCL3,CCL4,CCL…			GO: Biological Process	GO:1903827	regulation of cellular protein localization	5.90061	AP2M1,ARF6,ATP5IF1,BBC3,BCL2L11,BCL3,BMF,CAV2,CCT3,CCT7,CCT8,CD2AP,CREB3,CSK,CYLD,DAB2,DDX58,DYNLL1,EDAR,EDEM2,EP300,EZR,FLNA,GBF1,GBP1,HECTD1,HES1,HNRNPM,HSP90AB1,HUWE1,IL6,IPO5,KDM1A,LCP1,LDLRAP1,LMNA,LZTS2,MSN,NUMB,NUP54,NUP58,NUTF2,PARK7,PARL,PCNT,PDE2A,PDPK1,PDZK1,PINK1,PRDX1,PTPN14,RALB,RASSF5,RCC2,RDX,RUVBL1,SIN3A,SIRT1,SLC9A1,SNAI2,SPTBN1,STARD7,SULF2,SYNJ2BP,TGFB3,TPR,TRIM29,UBE2G2,UBR5,…			GO: Biological Process	GO:0006820	anion transport	10	ABAT,ABCA1,ABCA12,ABCA7,ABCB4,ABCC1,ABCC11,ABCC2,ABCC5,ABCC6,ABCD2,ABCG1,ACACA,ACACB,ACE,ACE2,ACSL3,ACSL4,ACSL5,ACSL6,ADAMTS8,ADORA1,AGT,AGXT,AHCYL1,AKR1C1,AKT1,ANO10,ANXA1,APBA1,APOA2,APOC1,APOC2,APOL1,AQP1,AQP6,AQP8,AQP9,ARG1,ARL6IP5,ASIC3,ATP10A,ATP10B,ATP11B,ATP11C,ATP8A1,ATP8B2,ATP9A,ATP9B,AVPR1A,BDNF,BEST1,BEST2,BEST3,BSG,CA1,CA12,CA13,CA5A,CA6,CA7,CCK,CETP,CFTR,CHRNA3,CHRNA4,CHRNA6,CHRNB2,…			GO: Biological Process	GO:0009150	purine ribonucleotide metabolic process	10	ACACA,ACACB,ACOT7,ACR,ADCY10,ADCY8,ADCY9,ADK,ADORA2A,ADSSL1,AK1,AK5,AKAP5,ALDOC,AMPD1,APLP1,APRT,ATIC,ATP1A2,ATP1B1,ATP2B2,ATP5F1A,ATP5F1C,ATP5F1D,ATP5MC1,ATP5MC2,ATP5MF,ATP5MG,ATP5PB,ATP5PD,ATP5PF,ATP5PO,ATP6V0A2,ATP6V0A4,ATP6V1A,ATP6V1B2,BPGM,CALCA,CALM3,CAP1,CARD11,CBS,CEP290,COX15,COX4I1,COX5A,COX5B,COX6B1,COX7A2L,COX7C,COX8A,CRH,CRHR1,CTNS,CXCL9,CXCR3,CYC1,DCAKD,DLG1,DLG3,DLG4,DNAJC15,DRD2,D…			GO: Biological Process	GO:0071705	nitrogen compound transport	10	AAAS,ABAT,ABCB9,ABCC1,ABCC11,ACACA,ACE2,ACVR1C,ALKBH5,AOC1,APBA1,AQP1,AQP3,AQP7,ARHGEF7,ARL2,ARL6IP1,ARRB1,ATP13A2,ATP2A1,ATXN2,AVPR1A,AZIN2,BAD,BCL3,BGLAP,BMP7,BTK,CACNA1A,CCK,CCKBR,CD209,CD320,CD38,CD74,CDH17,CDK16,CHD7,CHRM5,CHRNA3,CHRNA4,CHRNA6,CHRNB2,CKAP5,CLEC4M,CLN3,CLN8,CLOCK,CLTRN,CNR1,COL4A3BP,CPT1A,CTNS,CUBN,CXCL12,DDC,DISP1,DRD1,DRD2,DTNBP1,EDA,EDNRA,EGFR,EIF2AK3,EPHA5,EXOC3L1,FAM3B,F…			GO: Biological Process	GO:0060341	regulation of cellular localization	10	AAAS,AACS,ABAT,ABCA12,ACAA2,ACHE,ACSL3,ACSM6,ACTL6A,ACTN2,ADCYAP1R1,ADIPOQ,ADORA2B,ADORA3,AGR2,AGTR2,AKAP5,AKAP6,AKAP8L,AKT2,ANG,ANK3,ANO1,ANXA13,ANXA4,AP2M1,APBB1,APLN,APOA2,APOD,AR,ARF1,ARF6,ARHGEF7,ARIH2,ARL2,ARL2BP,ASPH,ASTN2,ATG7,ATP13A2,ATP2A2,ATP5IF1,ATP6AP1,AXIN2,B4GALT1,BBC3,BCAP31,BCAS3,BCR,BDKRB1,BET1L,BGLAP,BIRC5,BMP4,BMP7,BMPR1A,BRSK2,BTN1A1,C12orf4,C1QTNF1,C2CD2L,C5,C5AR2,CABP1,CACN…			GO: Biological Process
GO: Biological Process	GO:0051094	positive regulation of developmental process	5.38349	ACTR3,ADAM8,ADAM9,ADCYAP1,ADGRL3,AKAP5,AMIGO2,ANKRD27,ANXA1,AP3B1,APOB,ARNTL,ARPC2,ASIC2,ATF1,ATP11C,ATP6AP1,ATP8A2,AVIL,AXIN2,B4GALT1,BAIAP2,BCL9L,BDNF,BLOC1S6,BMP2,BMP5,BTG1,C3,CACNA2D2,CALCA,CAMP,CBLN1,CCL5,CCND1,CD28,CD34,CD83,CD86,CDC20,CDH2,CDH5,CITED2,CLSTN2,CNR1,CORO1B,CREBL2,CUL7,CUX1,CX3CL1,CXCL8,CXCL9,CXCR2,CYP27B1,DBN1,DCC,DDHD2,DDR2,DISC1,DKK1,DLX5,DMRT1,DNM1L,DSCAM,ECM1,EFNB2,EGF,EI…			GO: Biological Process	GO:0009887	animal organ morphogenesis	10	ABL1,ACP5,ADAM15,ADAMTS1,AES,AFDN,AGTPBP1,ALDH1A1,ALDH1A2,ALMS1,ALPL,ALX3,ALX4,AMBN,AMELY,ANGPT1,ANKRD11,ANKRD6,AP2A1,AP2A2,AP2B1,APLP1,AQP3,AQP5,AQP6,ARG1,ARHGEF19,ARID1A,ARL13B,ARRB2,ASPN,ATP2B2,ATP6V1B1,ATP8A2,AXIN2,BARX2,BAZ1B,BBS7,BCAR3,BCL11B,BCL2,BCL2L11,BCOR,BCR,BGLAP,BHLHE41,BMP1,BMP6,BMP7,BRAF,BSG,BTBD7,CABP4,CARM1,CASP6,CASZ1,CAV3,CBS,CCDC39,CCDC40,CCL11,CCL2,CCN2,CD34,CD44,CDC42,CDKN2…			GO: Biological Process	GO:0002009	morphogenesis of an epithelium	5.88831	ADAM17,ALDH1A3,AP2M1,ARID1A,ARL13B,ATP7A,BCL10,CELSR1,COL4A1,COL5A1,CPLANE1,CXCR4,DAB2,DAG1,DICER1,DLG3,DLG5,DVL2,EFNB2,EPHA7,EZR,FLNA,FOXF2,FOXP1,FZD6,GATA4,GRSF1,HECTD1,HES1,HS2ST1,IL6,KDM5B,KDR,KLF4,KRT17,KRT6B,LAMA5,LCP1,LEF1,LHX1,MED12,MICAL2,MSN,MTHFD1L,NCOA3,NGFR,NOTCH1,NOTCH2,NUMB,POU2F1,PPP1CA,PSMA5,PSMA7,PSMB2,PSMB4,PSMB6,PSMD5,PSME4,PTCH1,RPS7,SCRIB,SERPINB5,SMARCA4,SNAI2,SOCS3,SPI1,ST…			GO: Biological Process	GO:0010562	positive regulation of phosphorus metabolic process	10	ABCA1,ABCA7,ACE,ACR,ACSL3,ACVR1,ACVR1B,ACVR2A,ADAM8,ADAM9,ADCY4,ADCY7,ADCY8,ADCYAP1R1,ADIPOQ,ADNP,ADORA1,ADORA2B,ADRA1B,ADRB3,AGAP2,AGT,AGTR1,AKAP6,AKAP9,AKT1,ALK,ALOX15,ALS2,ANGPT4,ANKRD6,APLN,APOC2,AR,ARHGEF2,ARL2BP,ARL6IP5,ARRB1,ATG14,ATP2B4,ATP6AP1,ATRAID,AVPR2,AXIN2,AZU1,BAG4,BAK1,BANK1,BAX,BCAR3,BCL10,BDNF,BMP1,BMP3,BMP4,BMP7,BMP8B,BMPR2,BNIP2,BRAF,BTBD10,C1QTNF2,C1QTNF3,CALCA,CALCR,CALCRL,…			GO: Biological Process	GO:0006412	translation	10	AARS,ACO1,ADAD1,AGO1,AGO4,AIMP1,AKT1,APLP1,ATF4,ATXN2,BANK1,BTG2,C1QBP,CALR,CARS,CARS2,CCL5,CD28,CDK5RAP1,CELF1,CELF4,CHCHD1,CNOT1,CNOT11,CNOT7,CNOT8,CNOT9,COA3,COPS5,CTIF,DAPK1,DAPK3,DARS2,DAZL,DDX1,DDX6,DENR,DHX29,DNAJC1,DTD1,EEF1A2,EEF1D,EEF1E1,EEF2,EEF2K,EEFSEC,EFL1,EFTUD2,EGFR,EIF1,EIF1AY,EIF1B,EIF2A,EIF2AK3,EIF2B1,EIF2B2,EIF2B3,EIF2B4,EIF2B5,EIF2S2,EIF2S3,EIF3B,EIF3E,EIF3G,EIF3H,EIF3I,EIF3J…			GO: Biological Process	GO:0009967	positive regulation of signal transduction	10	ABAT,ABL1,ABRA,ACPP,ACTN4,ACVR2A,ADAM9,ADAMTS20,ADAMTS3,ADGRV1,ADRA1A,ADRB3,AGPAT2,AGTR1,AKAP12,AKAP13,AKAP6,AKT2,ALDH1A3,ALOX12B,ALOX15B,ALS2,ANGPT1,ANKRD17,ANKRD6,APOL3,ARAF,ARFGEF1,ARHGAP4,ARRB1,ARRB2,ASCL1,ATF3,ATP2C1,ATP5IF1,ATP6AP1,ATP6V0C,ATP6V1C2,AVPI1,AXIN2,BAD,BANK1,BECN1,BIK,BIRC2,BIRC3,BIRC7,BLNK,BMF,BMP3,BMP5,BMP6,BMP7,BMP8B,BMPR1B,BMPR2,BRAF,BST2,BUB1,BUD31,C1QBP,C1QTNF1,C3,C5,CALM2…			GO: Biological Process	GO:0055065	metal ion homeostasis	10	ABCB6,ABCB7,ABCG2,ADCYAP1R1,ADRA1A,ADRA1B,ADRA1D,AGTR2,AKAP5,AKAP6,ALAS2,ANK1,ANK3,ANPEP,ANXA7,APLP2,APOE,ARF1,ASPH,ATOX1,ATP12A,ATP13A1,ATP13A2,ATP13A4,ATP1B2,ATP2A1,ATP2A2,ATP2A3,ATP2B3,ATP2C1,ATP2C2,ATP4A,AVPR1B,AVPR2,BBC3,BCAP31,BDKRB1,BDKRB2,BMP4,C1QTNF1,C7,CACNA1A,CACNA1C,CACNA1F,CACNA1I,CACNA2D1,CACNB3,CALCA,CALCR,CALM3,CAMK2D,CAPN3,CASQ1,CASQ2,CCKBR,CCL1,CCL11,CCL19,CCL2,CCL21,CCL23,CCL28…			GO: Biological Process
GO: Biological Process	GO:0031346	positive regulation of cell projection organization	5.38295	ACTR3,ADCYAP1,AKAP5,ANKRD27,ARPC2,ATF1,ATP8A2,AVIL,BAIAP2,BDNF,BMP5,CDC42EP1,CDC42EP4,CNR1,CORO1B,CUL7,CUX1,DBN1,DCC,DISC1,DSCAM,EIF2B2,ENPP2,EPOR,EPS8L2,FEZ1,FIG4,FKBP1B,FNBP1L,FYN,GPRC5B,GSK3B,HNRNPK,IL1RAP,IL1RAPL1,IL6,ITGA3,KIF3C,L1CAM,LCN2,LIF,LPAR1,LRRC7,MAP1B,MAP2K2,MAPK6,MARCKS,MEGF8,MYO3A,NCKAP1,NIN,NPTN,NRG1,NTRK2,NTRK3,NUMBL,PALM,PLXNB1,PPP1R9A,PPP2R5B,PRKN,PSEN1,PTK7,PTPRD,PTPRF,RAB11…			GO: Biological Process	GO:0048878	chemical homeostasis	10	ABCB6,ABCB7,ABCG2,ABCG5,ABCG8,ABL1,ACACA,ACAD10,ACADL,ACADM,ACO1,ACOX1,ADCY2,ADCY3,ADCY8,ADCY9,ADCYAP1R1,ADGRF5,ADNP,ADRA1B,ADRA1D,ALAS2,ALMS1,ALOX12,ALOX12B,ALOXE3,ANK1,ANO1,ANXA7,APOA2,APOA5,APOB,APOC2,APOC4,APOE,APP,AQP2,AQP3,AQP4,AQP5,AQP6,AQP7,AQP8,AQP9,ASGR2,ASPH,ASPSCR1,ATOX1,ATP12A,ATP13A1,ATP13A2,ATP13A3,ATP1A1,ATP1B1,ATP1B2,ATP2A1,ATP2A3,ATP2B2,ATP2B3,ATP2B4,ATP2C2,ATP4A,ATP4B,ATP5F1B,A…			GO: Biological Process	GO:0033043	regulation of organelle organization	5.8721	AKAP13,ARF6,ARFGEF1,ARFIP1,ARHGAP28,ARHGEF10,ARPC5,ATAD2B,ATP5IF1,AVIL,BBC3,BCL2L11,BIK,BIRC5,BMF,CAMSAP2,CAPZA1,CAV1,CAV2,CCL24,CCT3,CCT7,CCT8,CD2AP,CELSR1,CEP135,CLIP1,CLTRN,CYLD,DCN,DDHD2,DNMT3B,DYNC1LI1,DYNLL1,EIF4G3,EP300,ESPN,EVI5L,EZR,FLNA,FMN2,FMR1,FSCN1,HES1,HNRNPU,HUWE1,IL1A,JARID2,JDP2,KANK2,KDM1A,KDM4B,KDR,LCP1,LMAN1,LMNA,LRP1,MECP2,MSH2,MSN,MYADM,MYCBP2,MYH9,MYO5A,MYOCD,NCOR1,NEK7,NI…			GO: Biological Process	GO:0098662	inorganic cation transmembrane transport	10	ACACA,ACACB,AGT,AKAP6,AKAP7,AKAP9,AQP1,ARF1,ASIC1,ASIC3,ASPH,ATOX1,ATP1B2,ATP1B3,ATP2A1,ATP2B1,ATP2B3,ATP2B4,ATP2C1,ATP2C2,ATP4B,ATP5F1A,ATP5F1B,ATP5F1C,ATP5F1D,ATP5MC1,ATP5MC2,ATP5MC3,ATP5MF,ATP5MG,ATP5PB,ATP5PD,ATP5PF,ATP6AP1,ATP6V0A1,ATP6V0A2,ATP6V0C,ATP6V0D1,ATP6V1B1,ATP6V1G3,BAX,BBC3,BDKRB1,BMP4,CACNA1B,CACNA1C,CACNA1E,CACNA1F,CACNA1G,CACNA1H,CACNA2D1,CACNA2D2,CACNA2D4,CACNB1,CACNB2,CACNB3,C…			GO: Biological Process	GO:0006163	purine nucleotide metabolic process	10	ACACA,ACACB,ACOT7,ACR,ADCY10,ADCY8,ADCY9,ADK,ADORA2A,ADSSL1,AK1,AK5,AKAP5,ALDOC,AMPD1,APLP1,APRT,ATIC,ATP1A2,ATP1B1,ATP2B2,ATP5F1A,ATP5F1C,ATP5F1D,ATP5MC1,ATP5MC2,ATP5MF,ATP5MG,ATP5PB,ATP5PD,ATP5PF,ATP5PO,ATP6V0A2,ATP6V0A4,ATP6V1A,ATP6V1B2,BPGM,CALCA,CALM3,CAP1,CARD11,CAT,CBS,CEP290,COX15,COX4I1,COX5A,COX5B,COX6B1,COX7A2L,COX7C,COX8A,CRH,CRHR1,CTNS,CXCL9,CXCR3,CYC1,DCAKD,DGUOK,DLG1,DLG3,DLG4,DNAJ…			GO: Biological Process	GO:0000165	MAPK cascade	10	ABL1,ACE2,ADAM9,ADRA1A,ADRB3,AKAP13,AKAP9,ALOX12B,ANGPT1,ANKRD6,APOE,ARAF,ARHGEF6,ARRB1,ARRB2,ATF3,ATP6AP1,AVPI1,BANK1,BIRC7,BMP3,BMP5,BMP6,BMP7,BMP8B,BRAF,BRAP,BTRC,C1QTNF1,C3,C3orf33,C5,CALM2,CALM3,CAMK2A,CAMK2B,CAMKK2,CAV3,CAVIN3,CBLC,CBS,CCKBR,CCL11,CCL16,CCL2,CCL20,CCL22,CCL24,CCL25,CCL4,CCL8,CCR1,CCR7,CD36,CD40,CD74,CD84,CDC42EP5,CDC42SE1,CDK1,CDK12,CDK5RAP3,CEACAM1,CIB1,CNTF,CRKL,CSF1R,CSF…			GO: Biological Process	GO:0032989	cellular component morphogenesis	10	ABCC4,ABI1,ABLIM1,ACHE,ACTB,ACTN2,ACTN4,ACTR2,ADAM15,ADAMTS16,ADCY1,ADD1,ADGRB1,AK7,AKAP5,ALCAM,ALDOA,AMELX,ANAPC2,ANK3,ANKRD27,ANXA7,APBB1,APBB2,APOE,AR,ARHGAP35,ARHGEF18,ARHGEF7,ARMC4,ARX,ATG7,ATL1,ATP6V0D1,ATXN2,AXIN2,B9D1,BAIAP2,BASP1,BBOF1,BBS10,BBS9,BCL11A,BMP2,BMP4,BMP5,BMP7,BMPR1B,BOC,BRSK1,BRSK2,BRWD1,C1QBP,CABP4,CACNA1A,CACNA1F,CADM1,CAMK2A,CAMK2B,CAMSAP1,CAP1,CAPN3,CAPZB,CASQ1,CASQ2,CB…			GO: Biological Process
GO: Biological Process	GO:0032868	response to insulin	5.35856	APRT,ATP6AP1,ATP6V0A1,ATP6V0A2,ATP6V1B2,BAIAP2,BAIAP2L2,C2CD5,CAD,CAT,CAV2,CCL2,CCL5,CDK2,CITED1,CYP27B1,EIF6,GAB1,GGH,GHSR,GRB10,GRB14,GSK3B,HADH,HADHA,HNRNPK,IDE,IGF2,IL1B,IL6,INHBB,IRS1,KANK1,KHK,KL,LMBRD1,MARCKS,NUCB2,PCSK9,PDE3B,PDK4,PIK3C2A,PIK3R1,PKM,PPARA,PRKCA,PRKCZ,PTPN1,PTPN11,PTPRA,PTPRE,PTPRF,RAB13,RARRES2,RBP4,RETN,RHOQ,SCLY,SGK1,SLC2A8,SMARCC1,SORBS1,SORT1,SRC,SRD5A1,STAR,STXBP3,TC…			GO: Biological Process	GO:0009725	response to hormone	10	ABCG2,ABHD2,ACACA,ACAT1,ACR,ACSL1,ADAM9,ADAMTS1,ADCY2,ADCY3,ADCY8,ADCY9,ADCYAP1R1,ADRA1B,ADRM1,AGL,AGXT,AHSG,AIFM1,AK2,AKAP1,AKAP8,ALAD,ALDH1A2,ALDOB,ALPL,ANG,ANXA1,ANXA5,AP3S1,APEX1,APOA2,APOB,APPL1,APRT,ARG1,ARID1A,ARNT2,ARNTL,ARRB2,ARSA,ASNS,ATP1A1,ATP2A1,ATP6AP1,ATP6V0A2,ATP6V0A4,ATP6V0C,ATP6V0D1,ATP6V0E1,ATP6V1B1,ATP6V1C1,ATP6V1E1,ATP6V1F,ATP6V1G3,AURKA,AVPR1B,AVPR2,BAIAP2,BAIAP2L1,BAIAP2L2,…			GO: Biological Process	GO:0032870	cellular response to hormone stimulus	5.78157	ACSL1,ADCYAP1,AKAP13,AP3S1,ARID1A,ASNS,ATP6V0A2,ATP6V1B1,ATP6V1C2,CARM1,CAV1,CAV2,CLOCK,CPEB2,CPS1,CREBRF,CRY1,CSK,DAB2,DNMT3B,ENPP1,EP300,ESRRG,FBN1,FGF23,FOS,FOXP1,GATA4,GRB10,HNRNPU,IGFBP1,IL6,INHBA,KANK2,KLF9,LATS2,LEF1,MARCKS,MED12,MED4,MSN,MYO5A,NCF2,NCOA2,NCOA3,NCOR1,NEDD4,NFKB1,NGFR,NOTCH1,NPFFR2,NR2F6,NR4A2,PARK7,PDE3B,PDPK1,PELP1,PHIP,PLPP1,PRKCB,PRKCZ,PTGES3,PTGFR,RBFOX2,RDX,RNF6,RORC,…			GO: Biological Process	GO:0019941	modification-dependent protein catabolic process	10	AKT1,AMFR,ANAPC15,ANAPC16,ANAPC2,ANAPC4,ANAPC5,ANKIB1,ANKS1A,APC,ARRB1,ASB2,ATG7,ATRAID,AUP1,BAP1,BBS7,BCAP31,BIRC2,BTRC,BUB1,C18orf25,CAV3,CBLC,CCDC22,CCDC47,CCNF,CDC16,CDC27,CDC34,CDK1,CDK5RAP3,CENPE,CENPF,CHFR,COPS3,CSNK1A1,CSNK1D,CSNK1E,CSNK2A1,CSNK2A2,CUL1,CUL2,CUL7,CUL9,CYLD,DAB2IP,DDB1,DERL2,DERL3,DNAJB2,DNAJC10,DTL,DYNC1LI1,EDEM2,EDEM3,EGF,ELOC,ERCC8,ERLEC1,ERLIN1,ESPL1,FAF1,FAF2,FBXL14,F…			GO: Biological Process	GO:0009057	macromolecule catabolic process	10	ABCE1,ACE,ACE2,ACR,ADAM8,ADRA1B,AGL,AGO1,AGO4,AGXT,AKT1,AMBP,AMFR,ANAPC16,ANAPC2,ANAPC5,ANKS1A,APAF1,ARAF,ARIH1,ARNTL,ARRB1,ARSB,ASB2,ASB9,ATE1,ATG7,ATP13A2,ATRAID,AUP1,AXIN1,AZIN2,BACE2,BAG5,BAX,BBS7,BGN,BNIP3,BNIP3L,BTG2,BUB1,BUB3,C18orf25,C4BPB,CACUL1,CALM3,CAV3,CBLB,CCDC22,CCDC47,CD44,CD81,CDC16,CDC26,CDC42,CDK1,CDK5,CENPE,CEP192,CHI3L1,CHI3L2,CHIA,CHID1,CHIT1,CHMP4C,CHP1,CLN3,CLN5,CLN8,CNOT1…			GO: Biological Process	GO:0009628	response to abiotic stimulus	10	AAAS,AANAT,ABAT,ABHD12,ABRAXAS2,ACAA2,ACER1,ACOT11,ACOT2,ACTB,ACTN4,ACTR5,ADAM2,ADGRV1,ADIRF,ADRB3,ADSSL1,AGTRAP,AIFM1,AIPL1,AKT1S1,AKT2,ALAS2,ALKBH5,ALOX5,ANG,ANGPT2,ANGPT4,ANXA7,APOLD1,AQP1,ARHGEF2,ARNT2,ARRB1,ARRB2,ARSA,ARSB,ASCL1,ASCL2,ASIC1,ASIC2,ATP1A1,ATP1B1,ATP2B4,AURKB,AVPR1A,B4GALT2,BABAM2,BAD,BAG3,BAG5,BCAT1,BCL3,BECN1,BGLAP,BHLHE40,BIRC2,BMP6,BMP7,BRAF,BRD1,BTG2,CA9,CABP4,CACNA1F,CALC…			GO: Biological Process	GO:1901699	cellular response to nitrogen compound	10	ACTN2,ADCY1,ADCY8,ADCY9,ADIPOQ,ADRM1,AGO1,AGTR2,AGTRAP,AHSG,AIFM1,AKAP5,AKAP6,AKT2,AKT3,ALDOB,AOC1,AP3S1,APLP1,APOBEC1,AQP8,AQP9,ARG1,ASS1,ATP6AP1,ATP6V0A1,ATP6V0A4,ATP6V0B,ATP6V0C,ATP6V0D1,ATP6V0E1,ATP6V1B2,ATP6V1C1,ATP6V1C2,ATP6V1E1,ATP6V1F,ATP6V1H,BAIAP2,BAIAP2L1,BCAR1,BCDIN3D,BGLAP,CAMK2A,CASQ2,CAV2,CCL2,CCL5,CCNA2,CDC5L,CDH1,CDK2,CDK5R1,CFTR,CHRM2,CHRM3,CIB2,CISH,COL16A1,COL1A2,COL3A1,COL4A1…			GO: Biological Process
GO: Biological Process	GO:0008610	lipid biosynthetic process	5.35257	ABCB11,ABHD6,ACADVL,ACLY,ACOT7,ACSL4,AGPAT3,AKR1C1,AKR1C2,ALDH3A2,ALDH8A1,ALOX15,AMACR,ANXA1,APOB,ATG7,ATP1A1,B4GALT6,BCO1,BMP2,BMP5,C3,CDS2,COQ2,CREBL2,CRH,CYB5R2,CYP27A1,CYP27B1,CYP46A1,CYP7A1,CYP7B1,DDHD2,DGKE,DHCR7,DOLPP1,EDN2,EIF6,ELOVL7,ERLIN1,ERLIN2,ETNK2,ETNPPL,FA2H,FADS2,FADS3,FBXW7,FDFT1,FDPS,FDX1,FDXR,FGF1,FGF19,FGF23,FGF3,FGFR4,FIG4,GAB1,GBA,GPD1L,GPER1,HINT2,HNF4A,HSD11B1,HSD17B1,HSD…			GO: Biological Process	GO:0016477	cell migration	10	AAMP,ABCC1,ABHD2,ABHD6,ABI2,ABI3,ACE,ACP5,ACVR1B,ACVRL1,ADAM10,ADAM15,ADAM8,ADAM9,ADARB1,AJUBA,ALKBH1,ALOX12,ALOX15B,AMOT,ANG,ANGPT1,ANGPT2,ANGPT4,ANXA1,AOC3,APBB1,APBB2,APCDD1,APEX1,APOB,APOD,APOE,ARAP3,ARHGAP24,ARHGAP4,ARHGAP5,ARHGDIB,ARHGEF5,ARHGEF7,ARL13B,ARPC2,ARRB2,ARX,ASCL1,ASPM,ASTN1,ATOH8,ATP1B1,ATP1B2,ATP5F1B,AXL,AZU1,BAG4,BARHL1,BCAR1,BCAS3,BCL2,BCR,BRAF,BRAT1,BSG,BST2,C16orf45,C5,C5or…			GO: Biological Process	GO:0002262	myeloid cell homeostasis	5.68009	ADAM17,ADAR,ATP5IF1,BCL2L11,FANCC,HIPK2,HMGB2,IL6,INHBA,IREB2,ISG15,KDM1A,KLF2,MB,NCOR1,NCSTN,PRDX1,RBFOX2,RHCE,RPS14,RPS19,RPS6,SLC25A38,SMARCA4,SPI1,STAT5A,TGFBR3,TMOD3			GO: Biological Process	GO:0009887	animal organ morphogenesis	10	ABLIM1,ABR,ACP5,ACTA2,ACTC1,ACTG2,ACVR1,ADAM15,AES,AGT,AGTPBP1,AGTR1,ALDH1A2,ALDH1A3,ALPL,ALX3,ANKRD6,AP2A2,AP2B1,AP2M1,AP2S1,APC,APLP1,AQP1,AQP6,AR,ARG1,ARID5B,ASPN,ATP6V1B1,AXIN2,BAK1,BARX2,BASP1,BAX,BAZ1B,BBS7,BCAR3,BCL11B,BDNF,BMP1,BMP4,BMP7,BMPR1B,BMPR2,BRAF,BSG,BTRC,CARM1,CASZ1,CAV3,CBS,CCDC39,CCL11,CCM2L,CD34,CDH2,CDON,CDX4,CELSR2,CELSR3,CER1,CHAD,CHUK,CITED1,CLDN5,CLIC5,CLTC,CLUAP1,CNTF,C…			GO: Biological Process	GO:0009123	nucleoside monophosphate metabolic process	10	ADK,ADSSL1,AK1,AK5,ALDOC,AMPD1,APRT,ATIC,ATP1A2,ATP1B1,ATP5F1A,ATP5F1C,ATP5F1D,ATP5MC1,ATP5MC2,ATP5MF,ATP5MG,ATP5PB,ATP5PD,ATP5PF,ATP5PO,ATP6V0A2,ATP6V0A4,ATP6V1A,ATP6V1B2,BPGM,CAD,CARD11,CMPK1,COX15,COX4I1,COX5A,COX5B,COX6B1,COX7A2L,COX7C,COX8A,CTNS,CYC1,DGUOK,DLG1,DLG3,DLG4,DNAJC15,DNPH1,EIF6,ENO1,ENO3,ENTPD5,FBP1,FXN,GADD45GIP1,GALE,GALT,GART,GCK,GPI,HIF1A,HK1,HK2,HSPA8,INSR,KHK,LDHA,MIF,MLXIP…			GO: Biological Process	GO:0051130	positive regulation of cellular component organization	10	ABI2,ABLIM3,ACE2,ACHE,ACTL6A,ACTN4,ACTR3,ACTR3B,ADAM9,ADAMTS1,ADGRB2,ADGRE5,AHI1,AKAP8,AKT2,ALX1,AMBRA1,ANAPC2,ANGPT1,ANK1,ANKFY1,APOA5,APOE,AQP1,ARFIP2,ARHGAP35,ARHGEF15,ARHGEF7,ARID5A,ARIH2,ARL2,ARPC1A,ARPC4,ARRB1,ARRB2,ARSB,ASIC2,ATF1,ATG5,ATP5IF1,AURKB,AXIN2,AZU1,BAD,BAIAP2L1,BAIAP2L2,BAP1,BBS4,BCAS3,BCR,BECN1,BICD1,BIK,BMF,BMP5,BMP7,BMPR2,BRAF,BRD7,BRK1,C1QBP,C3,C6orf89,CALCOCO2,CALR,CALY,CA…			GO: Biological Process	GO:0010243	response to organonitrogen compound	10	AACS,ABAT,ABCC2,ABCG2,ACTN2,ADCY1,ADCY8,ADCY9,ADIPOQ,ADRA1B,ADRM1,ADSS,AGTR2,AGTRAP,AGXT,AHSG,AIFM1,AKAP5,AKAP6,AKT2,AKT3,ALDOB,AOC1,AP3S1,APLP1,APOBEC1,AQP8,AQP9,ARG1,ASPH,ASS1,ATP2A1,ATP2A2,ATP4B,ATP6AP1,ATP6V0A1,ATP6V0A4,ATP6V0B,ATP6V0C,ATP6V0D1,ATP6V0E1,ATP6V1B2,ATP6V1C1,ATP6V1C2,ATP6V1E1,ATP6V1F,ATP6V1H,AVPR1B,AVPR2,BAIAP2,BAIAP2L1,BCAR1,BCHE,BGLAP,BMP7,BSG,CALM3,CAMK2A,CARD9,CASQ2,CAT,CAV2,…			GO: Biological Process
GO: Biological Process	GO:0001568	blood vessel development	5.33588	ACTA2,ADAM15,ADAM8,ADAMTS6,ANGPT1,ANKRD17,ANPEP,APOB,APOD,ARID1A,B4GALT1,BTG1,C1GALT1,C3,CAMP,CCL2,CCL5,CD34,CDH13,CDH2,CDH5,CITED1,CITED2,CLIC4,COL15A1,COL3A1,COL4A1,COL4A2,COL5A1,CSPG4,CUL7,CX3CL1,CXCL10,CXCL13,CXCL17,CXCL8,CXCR2,DCTN5,DHCR7,DLL4,ECM1,EFNB2,EGF,EGLN1,EMP2,ENPP2,EPHB4,EPOR,ERBB2,ESM1,ETS1,ETV2,FAP,FBXW7,FGF1,FLNA,FLT4,FLVCR1,FZD4,GATAD2A,GJC1,GPER1,GPI,GREM1,HEY1,HHEX,HHIP,HIPK1…			GO: Biological Process	GO:0014070	response to organic cyclic compound	10	ABAT,ABCD3,ABCG2,ABHD2,ABL1,ACACA,ACACB,ACAT1,ACP5,ACR,ACSL1,ACSL3,ADAM9,ADAMTS1,ADCY2,ADCY3,ADCYAP1R1,ADRA1B,AGL,AGXT,AIFM1,AKAP1,AKAP7,ALAD,ALDH1A2,ALDOB,ALPL,AMH,ANGPT2,ANXA1,ANXA7,APEX1,APLP1,APOA2,APP,AQP3,AQP8,AQP9,ARG1,ARID1A,ARNT2,ARNTL,ARRB2,ARSA,ASCL1,ASNS,ASPH,ATF1,ATP12A,ATP1A1,ATP2B4,AURKA,AXIN2,BCAS3,BCDIN3D,BCHE,BCL2,BGLAP,BID,BMP6,BMP7,BRAF,BSG,BUD31,BYSL,C3,CALCOCO1,CALCR,CALM1,C…			GO: Biological Process	GO:0045071	negative regulation of viral genome replication	5.66573	ADAR,APOBEC3F,APOBEC3G,CCL5,EIF2AK2,HMGA2,IFIT1,IFITM1,IFITM2,IFITM3,ISG15,MX1,PLSCR1,RSAD2,SRPK1			GO: Biological Process	GO:0002218	activation of innate immune response	10	ADAM8,ARF6,BCL10,BIRC2,BTRC,C1QBP,CASP8,CD14,CD180,CD86,CHUK,CLEC4E,CNPY3,COLEC12,CTSB,CTSL,CUL1,CYBA,CYLD,DAB2IP,DDX60,FADD,FCER1G,FCN1,GFI1,HAVCR2,HMGB1,HSP90B1,HSPD1,ICAM2,IKBKE,IKBKG,IRAK2,IRAK3,IRAK4,IRF3,IRF4,IRF7,ITCH,ITGAM,ITGB2,KLRK1,KRAS,LGALS9,LGMN,LSM14A,LTF,LY96,LYN,MALT1,MAP2K6,MAP3K7,MARCO,NFKBIA,NOD1,NOD2,NR1H4,PAK1,PAK2,PAK3,PGLYRP4,PIK3C3,PIK3R4,PLCG2,PRKACA,PRKCD,PRKCE,PSMA1,PS…			GO: Biological Process	GO:0009167	purine ribonucleoside monophosphate metabolic process	10	ADK,ADSSL1,AK1,AK5,ALDOC,AMPD1,APRT,ATIC,ATP1A2,ATP1B1,ATP5F1A,ATP5F1C,ATP5F1D,ATP5MC1,ATP5MC2,ATP5MF,ATP5MG,ATP5PB,ATP5PD,ATP5PF,ATP5PO,ATP6V0A2,ATP6V0A4,ATP6V1A,ATP6V1B2,BPGM,CARD11,COX15,COX4I1,COX5A,COX5B,COX6B1,COX7A2L,COX7C,COX8A,CTNS,CYC1,DLG1,DLG3,DLG4,DNAJC15,EIF6,ENO1,ENO3,ENTPD5,FBP1,FXN,GADD45GIP1,GALE,GALT,GART,GCK,GPI,HIF1A,HK1,HK2,HSPA8,INSR,KHK,LDHA,MIF,MLXIPL,MPI,MPP3,MYH3,MYH7,M…			GO: Biological Process	GO:0000902	cell morphogenesis	10	ABI1,ABL1,ABLIM1,ABLIM3,ACHE,ACTB,ACTN1,ACTN4,ACTR3,ADAMTS16,ADCY1,AFG3L2,AHI1,AK7,AKIP1,ALCAM,ALS2,ALX1,AMELX,ANAPC2,ANTXR1,ANXA7,APOE,ARAP3,ARHGAP18,ARHGAP35,ARHGAP4,ARHGEF2,ARHGEF7,ARX,ATG5,ATXN10,ATXN2,AXIN2,B4GAT1,B9D1,BASP1,BBS10,BBS4,BMP5,BMP7,BMPR1B,BMPR2,BOC,BRAF,BTBD3,BVES,C1GALT1C1,C1QBP,CABP4,CACNA1A,CACNA1F,CADM1,CALR,CAMK2A,CAMK2B,CAMSAP1,CAP1,CAPRIN1,CAPRIN2,CAPZB,CARMIL1,CASP9,CCD…			GO: Biological Process	GO:0018193	peptidyl-amino acid modification	10	AAAS,ABI1,ABI3,ACTL6A,ACVR1,ACVR1B,ADAM17,ADIPOQ,AFAP1L2,AGTPBP1,AHSG,AKT2,AKT3,ALK,ANGPT4,APBB1,APLP2,APOA2,ARAF,ARID4A,ARID4B,ARL2BP,ASH1L,ASPH,ATF2,ATG7,ATP13A2,AURKB,AURKC,BCAR3,BCL11A,BCR,BDKRB2,BGLAP,BGN,BIRC5,BMP7,BMX,BRCA2,BRD1,BRD7,BRPF1,BRPF3,BRSK1,BRSK2,BTC,BTK,C20orf173,CALM3,CAMK1,CAMK2A,CAMK2B,CAMK2D,CAMKMT,CAPN3,CAV2,CBLC,CBX8,CCK,CCL5,CD3E,CD4,CD40,CD81,CDC37,CDC42,CDC7,CDK2,CDK5,…			GO: Biological Process
Pathway	99052	Lysosome	5.23331	ACP2,AGA,AP1G1,AP1S1,AP3B1,AP3S2,AP4S1,ARSG,ASAH1,ATP6AP1,ATP6V0A1,ATP6V0A2,CLN3,CLTC,CTSA,CTSB,CTSG,CTSL,CTSS,CTSV,FUCA1,GAA,GALNS,GBA,GLB1,GUSB,IDUA,LAMP1,LAPTM4B,LGMN,LIPA,LITAF,MAN2B1,MANBA,NAGLU,NAPSA,PPT1,SLC17A5,SORT1,TCIRG1			GO: Biological Process	GO:0008610	lipid biosynthetic process	10	A4GALT,ABCB11,ABCD3,ABHD3,ABHD5,ABHD6,ACACA,ACACB,ACADL,ACBD3,ACER1,ACER3,ACHE,ACOT8,ACSL1,ACSL3,ACSL5,ACSL6,ACSS1,ACSS2,ADGRF5,ADORA2B,AGPAT2,AGPAT3,AGPS,AJUBA,AKR1D1,ALDH1A1,ALDH1A2,ALDH3A2,ALOX12,ALOX12B,ALOX15B,ALOX5AP,ALOXE3,AMACR,ANG,ANXA1,APOA2,APOA5,APOB,APOC2,APOE,ARV1,ATP1A1,B3GNT5,B4GALNT1,BCO1,BMP6,C3,CACNA1H,CBR1,CCDC3,CD74,CDIPT,CDS1,CEACAM1,CERS1,CERS2,CERS4,CERS5,CERS6,CHKA,CHPT1,…			GO: Biological Process	GO:0051169	nuclear transport	5.65946	ADAR,AKAP13,BCL3,CREB3,CYLD,DAB2,DAG1,DDX25,DDX58,EDAR,EP300,FLNA,FYTTD1,HES1,HNRNPA2B1,HSP90AB1,HSPA8,IL6,IPO4,IPO5,IPO7,IPO8,KPNB1,LMNA,LZTS2,MLXIP,NCBP2,NEDD4,NOC2L,NUDT4,NUP205,NUP210,NUP214,NUP54,NUP58,NUTF2,PARK7,PDE2A,PHIP,POLDIP3,PPP1CC,PPP1R12A,PRDX1,PTPN14,RPL23,SIRT1,SLC9A1,SMG1,SNAI2,SNRPB,SPTBN1,SRRM1,SRSF1,SRSF6,SRSF9,STAT3,SULF2,TGFB3,TNPO3,TPR,TRPS1,TXNIP,UBR5,UHMK1,XBP1			GO: Biological Process	GO:1904666	regulation of ubiquitin protein ligase activity	10	ANAPC15,ANAPC16,ANAPC2,ANAPC4,ANAPC5,BTRC,CDC16,CDC27,CDK1,CUL1,FBXO5,FZR1,MAD2L1,MASTL,PLK1,PSMA1,PSMA2,PSMA3,PSMA4,PSMA5,PSMA6,PSMA7,PSMB1,PSMB10,PSMB2,PSMB3,PSMB4,PSMB5,PSMB6,PSMB7,PSMC2,PSMC3,PSMC4,PSMC5,PSMC6,PSMD10,PSMD11,PSMD12,PSMD13,PSMD14,PSMD2,PSMD3,PSMD6,PSMD7,PSMD8,PSMD9,PSME1,PSME4,PSMF1,PTEN,SKP1,UBA52,UBB,UBC,UBE2D1,UBE2S,USP44			GO: Biological Process	GO:0009117	nucleotide metabolic process	10	ACACA,ACACB,ACOT7,ACPP,ACR,ADCY10,ADCY8,ADCY9,ADK,ADORA2A,ADSSL1,AK1,AK5,AK8,AKAP5,ALDOC,AMPD1,APLP1,APRT,ATIC,ATP1A2,ATP1B1,ATP2B2,ATP5F1A,ATP5F1C,ATP5F1D,ATP5MC1,ATP5MC2,ATP5MF,ATP5MG,ATP5PB,ATP5PD,ATP5PF,ATP5PO,ATP6V0A2,ATP6V0A4,ATP6V1A,ATP6V1B2,BPGM,CAD,CALCA,CALM3,CAP1,CARD11,CAT,CBS,CDA,CEP290,CMPK1,CNGB3,COX15,COX4I1,COX5A,COX5B,COX6B1,COX7A2L,COX7C,COX8A,CRH,CRHR1,CTNS,CXCL9,CXCR3,CYC1,DC…			GO: Biological Process	GO:0072359	circulatory system development	10	ACE,ACTC1,ADAMTS1,ADAMTS6,ADGRB2,ADIPOR2,ADM2,ADRA1A,AGTR1,AHI1,AKAP13,AKAP6,ALDH1A2,ALPK3,ANG,ANGPT1,ANGPT2,ANGPT4,ANKRD17,ANKS6,ANTXR1,ANXA3,AP2B1,APOD,APOE,APOLD1,AQP1,ARHGEF15,ATG5,ATP5IF1,AXIN2,B9D1,BASP1,BAZ1B,BBS4,BCAS3,BECN1,BMP7,BMPR2,BTG1,BVES,C1GALT1,C3,C3AR1,C5,C6,CACYBP,CAD,CALCA,CALR,CAV3,CCBE1,CCL11,CCL2,CCL24,CCM2L,CCN6,CD34,CD36,CDK1,CDX2,CEACAM1,CHD7,CHRNA3,CIB1,CITED1,CLIC4,CMA…			GO: Biological Process	GO:0051241	negative regulation of multicellular organismal process	10	ABAT,ABCG5,ACP5,ACVRL1,ADAMTS1,ADAMTS18,ADAMTS7,ADGRB1,ADGRB2,ADIPOQ,ADORA2B,ADRA1A,ADRA1D,ADRB3,AGTR2,AHSG,AKAP8,ALOX12,AMOT,ANGPT4,ANPEP,ANXA4,APBB1,APCS,APLN,APOA2,APOC1,APOC2,APOD,APOE,APOH,AQP4,ARF6,ARHGEF15,ASCL2,ASPM,ASPN,ATF5,ATG9A,ATP2A1,ATP2A2,ATXN2,AVPR2,AXIN2,BCL11A,BCR,BMP2,BMP4,BMP5,BMP7,BMPR1A,BRCA2,BTK,BTN1A1,C16orf45,C1QBP,C1QC,C1QTNF1,C5AR2,CALCA,CALCR,CAPN3,CBFA2T2,CCL2,CCL21,C…			GO: Biological Process
Pathway	132956	Metabolic pathways	4.07709	AASS,ACADVL,ACAT2,ACLY,ACO1,ACOT2,ACP1,ACP2,ACSL4,ADI1,AGMAT,AGPAT3,AHCY,AK4,ALDH18A1,ALDH3A2,ALDH4A1,ALDH6A1,ALDOC,ALG2,ALG8,ALG9,ALOX15,ALPP,AMACR,ANPEP,AOC1,AOX1,APRT,ASAH1,ASAH2,ASNS,ATP5F1D,ATP5PD,ATP6AP1,ATP6V0A1,ATP6V0A2,ATP6V1B2,AUH,B3GALNT1,B3GALT2,B3GAT1,B3GAT3,B4GALT1,B4GALT6,BCKDHB,BCO1,BDH2,BPGM,BPNT1,BST1,BTD,C1GALT1,CAD,CBS,CDS2,CHPF,CNDP2,COMT,COQ2,COQ3,COQ5,CRYL1,CTPS2,CYP27A1,CY…			GO: Biological Process	GO:0045944	positive regulation of transcription by RNA polymerase II	10	AATF,ABRA,ACVR1B,ACVR2A,ACVRL1,ADIRF,AKAP8L,AKIRIN2,AKNA,ALX4,APBB1,APP,ARHGEF2,ARID2,ARID3B,ARID4B,ARMCX3,ARNT2,ARNTL,ARNTL2,ASCL1,ASH1L,ATAD2,ATAD2B,ATF1,ATF6,ATP1B4,ATXN7,AUTS2,BACH1,BARHL1,BARX1,BARX2,BCAS3,BCL11B,BCL9L,BMP6,BMP7,BRD4,BUD31,CALCOCO1,CAMK1,CAPRIN2,CARF,CASK,CAVIN2,CBFA2T2,CBFB,CCDC62,CCNC,CCNH,CCNL1,CCNT1,CCNT2,CCPG1,CD3D,CD40,CD81,CDC73,CDH13,CDK8,CDKN2A,CDKN2B,CDX1,CEBPZ,CEN…			GO: Biological Process	GO:1903507	negative regulation of nucleic acid-templated transcription	5.63487	AIM2,ARID1A,ATAD2B,ATF3,BASP1,BAZ2A,BCL3,BHLHE40,BIRC5,BTG2,CAV1,CBFA2T2,CBX5,CDKN1C,CHD8,CLOCK,CREBRF,CRY1,CXXC5,CYLD,CYP1B1,DAB2,DDIT3,DICER1,DNMT3B,E2F7,EFNA1,EHMT1,ELF3,ENO1,EP300,ERBIN,EZR,FLNA,FOXF2,FOXN3,FOXP1,FOXP4,FZD6,HDGF,HES1,HIC2,HIPK2,HMGA2,HMGB2,HNRNPA2B1,HSPA8,IKZF4,IRAK1,IRF8,JARID2,JAZF1,JDP2,KANK2,KDM1A,KDM5B,KLF4,KLF5,LEF1,LHX1,LIMS1,LMCD1,LOXL2,LRRFIP1,MDM4,MECP2,MEF2A,MORF4L…			GO: Biological Process	GO:0048878	chemical homeostasis	10	AACS,ABCA1,ABCA12,ABCB4,ABCB6,ABCB7,ABCC2,ABCG1,ABCG5,ACACA,ACADM,ACADS,ACO1,ACOX1,ACOX3,ACSM3,ADCY4,ADCY7,ADCY8,ADCYAP1R1,ADIPOQ,ADNP,ADORA1,ADRA1B,AGT,AGTR1,AKAP6,AKR1C1,AKT1,ALAS2,ALOX12,AMPD2,ANGPTL8,ANK1,ANKRD26,ANPEP,APLP2,APOA2,APOB,APOC2,APOC4,AQP1,AQP2,AQP4,AQP6,AQP8,AQP9,ARF1,ARRB1,ASGR2,ASPH,ASPSCR1,ATG7,ATOX1,ATP13A2,ATP1B2,ATP1B3,ATP2A1,ATP2B1,ATP2B3,ATP2B4,ATP2C1,ATP2C2,ATP4B,ATP5F1…			GO: Biological Process	GO:0034097	response to cytokine	10	ACKR1,ACSL1,ADAM10,ADAMTS13,ADIPOQ,AES,AGPAT2,AKT1,ALAD,ALDH1A2,ANGPT1,ANXA1,AQP4,ARG1,ASS1,BBS2,BGN,BST2,C19orf66,CALCA,CAMK2A,CAMK2B,CAMK2G,CARD14,CCL1,CCL11,CCL13,CCL16,CCL18,CCL19,CCL2,CCL20,CCL21,CCL22,CCL23,CCL24,CCL26,CCL3,CCL5,CCL8,CCR1,CCR6,CCR9,CD14,CD27,CD274,CD38,CD44,CD70,CD74,CDC37,CDC5L,CDIP1,CHAD,CHI3L1,CIITA,CITED1,CLCF1,CLDN18,CNOT9,CNTF,CNTFR,COMMD7,CORO1A,CREBRF,CSF1,CSF1R,CSF…			GO: Biological Process	GO:0022603	regulation of anatomical structure morphogenesis	10	ABL1,ACHE,ACTN4,ACTR3,ADAM9,ADAMTS1,ADAMTS16,ADGRB2,ADM2,AGTR1,AHI1,AKAP13,ALX1,AMELX,ANAPC2,ANGPT2,ANGPT4,ANKRD6,ANXA3,ANXA7,AP2A1,AP2A2,AP2B1,AP2M1,AP2S1,APOE,AQP1,ARAP3,ARHGAP18,ARHGAP35,ARHGAP4,ARHGEF7,ARRB2,ATG5,AXIN2,BASP1,BBS4,BCR,BMP5,BMP7,BMPR2,BRAF,BTBD7,BTG1,BVES,C1QBP,C3,C3AR1,C5,C6,CACNA1A,CALR,CAMK1,CAMK2B,CAMSAP1,CAPRIN1,CAPRIN2,CAPZB,CARM1,CARMIL1,CAV3,CCBE1,CCL11,CCL2,CCL24,CCN6,…			GO: Biological Process	GO:0009967	positive regulation of signal transduction	10	AAK1,ABAT,ABCA7,ACTN4,ACVR1,ACVR1B,ACVRL1,ADAM17,ADAMTS20,ADAMTS3,ADIPOQ,ADORA2B,ADORA3,ADRA1A,ADRA1B,ADRB3,ADRM1,AFAP1L2,AGR2,AGTR2,AKAP5,AKAP6,AKR1C2,AKT2,ALK,ALOX15,ANKRD6,APAF1,APOPT1,AR,ARAF,ARFGEF1,ARHGAP6,ARHGEF5,ARL2BP,ARPP19,ASPH,ASPM,ATP2C1,ATP5IF1,ATP6AP1,ATP6V0C,ATP6V1C2,AVPI1,AXIN2,BBC3,BCAP31,BCL2L14,BMP1,BMP2,BMP4,BMP5,BMP7,BMPR1A,BMPR1B,BRD4,BUD31,C1QBP,C1QTNF1,C1QTNF2,C5,C5AR2,CA…			GO: Biological Process
Pathway	814926	Carbon metabolism	4.07633	ACAT2,ACO1,ALDH6A1,ALDOC,CAT,DLST,ENO2,FBP1,FBP2,GLUD1,GPI,GPT2,H6PD,HADHA,HAO1,HK1,HKDC1,IDH2,IDH3A,IDH3G,ME1,ME2,MUT,OGDHL,PC,PCCB,PFKL,PGLS,PHGDH,PKM,RGN,RPE,SDS,SUCLG2,TKFC			GO: Biological Process	GO:0010035	response to inorganic substance	10	ABAT,ABCG2,ABL1,ACER1,ACO1,ACP5,ADAM9,ADCY10,ADNP,AIFM1,ALAD,ALB,ALDOB,ALG2,ALOX5AP,ANXA1,ANXA5,ANXA7,APBB1,APEX1,APOB,APP,AQP2,AQP3,AQP9,ARG1,ASCL1,ASPH,ATF1,ATIC,ATP12A,ATP13A2,ATP2B4,ATP5F1D,AXL,BCL2,BGLAP,BMP6,BMP7,BNIP3,BRAF,BSG,C1QA,C3,CACNA1H,CALM1,CALM2,CARF,CASP3,CASP6,CASP8,CASQ2,CCL19,CCNA2,CCNB1,CCND1,CCS,CD14,CD9,CDK1,CDK2,CDK4,CDKN1B,CDKN2A,CHRNA3,COL18A1,COL1A1,CPNE3,CPNE6,CPOX,CRE…			GO: Biological Process	GO:0006913	nucleocytoplasmic transport	5.59001	ADAR,AKAP13,BCL3,CREB3,CYLD,DAB2,DAG1,DDX25,DDX58,EDAR,EP300,FLNA,FYTTD1,HES1,HNRNPA2B1,HSP90AB1,HSPA8,IL6,IPO4,IPO5,IPO7,IPO8,KPNB1,LMNA,LZTS2,MLXIP,NCBP2,NEDD4,NUDT4,NUP205,NUP210,NUP214,NUP54,NUP58,NUTF2,PARK7,PDE2A,PHIP,POLDIP3,PPP1CC,PPP1R12A,PRDX1,PTPN14,RPL23,SIRT1,SLC9A1,SMG1,SNAI2,SNRPB,SPTBN1,SRRM1,SRSF1,SRSF6,SRSF9,STAT3,SULF2,TGFB3,TNPO3,TPR,TRPS1,TXNIP,UBR5,UHMK1,XBP1			GO: Biological Process	GO:0051444	negative regulation of ubiquitin-protein transferase activity	10	ANAPC15,ANAPC16,ANAPC2,ANAPC4,ANAPC5,CDC16,CDC27,CDK1,FBXO5,FZR1,MAD2L1,PARK7,PSEN2,PSMA1,PSMA2,PSMA3,PSMA4,PSMA5,PSMA6,PSMA7,PSMB1,PSMB10,PSMB2,PSMB3,PSMB4,PSMB5,PSMB6,PSMB7,PSMC2,PSMC3,PSMC4,PSMC5,PSMC6,PSMD10,PSMD11,PSMD12,PSMD13,PSMD14,PSMD2,PSMD3,PSMD6,PSMD7,PSMD8,PSMD9,PSME1,PSMF1,SMAD7,UBA52,UBB,UBC,UBE2D1,USP44			GO: Biological Process	GO:0055114	oxidation-reduction process	10	ABCD1,ABCD2,ACAA1,ACAA2,ACACB,ACAD11,ACADL,ACADS,ACADVL,ACO1,ACSBG2,ACSM1,ACSS2,ADGRF5,ADH7,ADI1,ADIPOQ,ADRA1B,AGL,AIFM3,AKR1B10,AKR1D1,AKR7A3,AKT1,ALDH16A1,ALDH18A1,ALDH1A2,ALDH1B1,ALDH1L1,ALDOC,ALKBH1,ALKBH4,ALKBH5,ALKBH6,ALKBH7,ALOX15B,ALOX5,ALOX5AP,ALOXE3,AMACR,AOC2,AOX1,APOA2,BAX,BCKDHA,BCKDHB,BDH2,BLVRA,BLVRB,BNIP3,CALM3,CAT,CAVIN3,CBR1,CBR3,CBR4,CBS,CCS,CFAP61,CHCHD5,CHDH,CISD1,COQ6,COX15,…			GO: Biological Process	GO:0042493	response to drug	10	ABAT,ABCA3,ABCB11,ABCC1,ABCC6,ABCG8,ACSL1,ACTC1,ADCY1,ADCYAP1R1,ADD3,ADIRF,ADRA1A,ADSSL1,AGPAT2,ALDH1A1,AOC1,APEX1,APOD,AQP1,ARRB1,ASIC2,ATG5,ATP1A1,BAD,BECN1,BGLAP,BRAF,CA9,CAD,CALR,CCL2,CCL4,CD38,CD86,CDK1,CDK2,CDK4,CDKN1B,CENPF,CERS1,CHRNA3,COL1A1,COQ7,CPS1,CPT1A,CROT,CTNNB1,CYBA,CYBB,CYP17A1,CYP2A6,CYP2C9,CYP4B1,DAD1,DDC,DGCR2,DHODH,DNMT1,DNMT3A,DNMT3B,DPEP1,DRD1,DRD2,DUSP6,DVL3,ECE1,EEF2,EIF…			GO: Biological Process	GO:0003012	muscle system process	10	ABAT,ACTA2,ACTN2,ADK,ADORA2B,ADRA1A,ADRA1B,ADRA1D,AGTR2,AKAP6,ALDOA,AR,ARHGEF11,ASPH,ATP2A1,ATP2A2,BDKRB2,CACNA1C,CACNA1H,CACNA1S,CACNA2D1,CACNB2,CALCA,CALM3,CAMK2B,CAMK2D,CAMK2G,CASQ1,CASQ2,CDK9,CFLAR,CHGA,CHRM2,CHRM3,CHRNA1,CHRNA3,CHRNB1,CHRNB2,CHRND,CHRNG,CHUK,CKMT2,CLCN1,CLIC2,CNN1,CRYAB,CTNNA3,CYBA,DAPK3,DES,DLG1,DMD,DMPK,DRD1,DSG2,DTNA,DYSF,ECE1,EDN2,EDNRA,EDNRB,F2R,FDPS,FGF12,FKBP1A,FLT1,F…			GO: Biological Process
							GO: Biological Process	GO:0033993	response to lipid	10	ABCG2,ABHD2,ABL1,ACACA,ACE,ACP5,ACR,ACSL1,ADAM9,ADAMTS1,ADCY2,ADCY3,ADCYAP1R1,ADH5,ADNP2,ADRA1B,AGL,AGXT,AIFM1,AKAP8,AKIRIN2,ALAD,ALDH1A2,ALDOB,ALOX12,ALPL,ANXA1,APOA2,APOB,AQP3,ARG1,ARID1A,ARNT2,ARNTL,ARRB2,ARSA,ASCL1,ATP1A1,ATP4B,AURKA,AXL,BCAS3,BCHE,BCL2,BCR,BGLAP,BID,BMP6,BMP7,BRINP1,BRINP2,BUD31,BYSL,C3,CALCOCO1,CALCR,CALM1,CALM2,CARM1,CASP1,CASP3,CASP8,CATSPER3,CATSPERD,CATSPERG,CBX3,CCDC62…			GO: Biological Process	GO:0045069	regulation of viral genome replication	5.58778	ADAR,APOBEC3F,APOBEC3G,CCL5,DICER1,EIF2AK2,FMR1,HMGA2,IFIT1,IFITM1,IFITM2,IFITM3,ISG15,MX1,NOTCH1,PKN2,PLSCR1,RSAD2,SRPK1			GO: Biological Process	GO:0055082	cellular chemical homeostasis	10	AACS,ABCB6,ABCB7,ABCC2,ACO1,ADCYAP1R1,ADRA1B,AGT,AGTR1,AKAP6,ALAS2,APLP2,AQP1,AQP2,AQP4,AQP6,AQP8,AQP9,ARF1,ARRB1,ASPH,ATG7,ATOX1,ATP13A2,ATP1B2,ATP1B3,ATP2A1,ATP2B1,ATP2B3,ATP2B4,ATP2C1,ATP2C2,ATP5F1B,ATP6V0A1,ATP6V0A2,ATP6V0C,ATP6V0D1,ATP6V1B1,ATP6V1D,ATP6V1G3,AVPR1A,AVPR1B,BAK1,BAX,BBC3,BCAP31,BDKRB1,BMP4,BRSK2,C1QTNF3,C7,CA7,CACNA1C,CACNA1E,CACNA1F,CACNA1G,CACNA2D1,CACNB3,CALCA,CALCR,CALM1,CA…			GO: Biological Process	GO:0009259	ribonucleotide metabolic process	10	ACACA,ACACB,ACOT7,ACR,ADCY10,ADCY8,ADCY9,ADK,ADORA2A,ADSSL1,AK1,AK5,AKAP5,ALDOC,AMPD1,APLP1,APRT,ATIC,ATP1A2,ATP1B1,ATP2B2,ATP5F1A,ATP5F1C,ATP5F1D,ATP5MC1,ATP5MC2,ATP5MF,ATP5MG,ATP5PB,ATP5PD,ATP5PF,ATP5PO,ATP6V0A2,ATP6V0A4,ATP6V1A,ATP6V1B2,BPGM,CAD,CALCA,CALM3,CAP1,CARD11,CBS,CEP290,CMPK1,COX15,COX4I1,COX5A,COX5B,COX6B1,COX7A2L,COX7C,COX8A,CRH,CRHR1,CTNS,CXCL9,CXCR3,CYC1,DCAKD,DLG1,DLG3,DLG4,DNAJ…			GO: Biological Process	GO:0036293	response to decreased oxygen levels	10	ABAT,ACAA2,ACOT2,ACTN4,AGTRAP,AIFM1,ALAS2,ALKBH5,ANG,ANGPT2,ANGPT4,APOLD1,AQP1,ARNT2,ASCL2,ATP1B1,BAD,BECN1,BIRC2,BMP7,CA9,CBFA2T3,CBS,CCL2,CCNA2,CD34,CD38,CDKN1B,CHRNA4,CHRNB2,CIAO3,COMMD1,CREBBP,CUL2,CXCL12,CYBB,CYGB,DDIT4,DNMT3A,DNMT3B,DRD1,DRD2,ECE1,EDNRA,EEF2K,EGLN2,EIF4EBP1,ELOB,ENDOG,ENG,ERCC2,ERO1A,FAM162A,FLT1,FOSL2,GNB1,GNGT1,GPR182,HIF1A,HIF1AN,HIF3A,HSD11B2,HSP90B1,HYOU1,ICAM1,IL1B,IR…			GO: Biological Process	GO:0000902	cell morphogenesis	10	ABCC4,ABI1,ABLIM1,ACHE,ACTB,ACTN4,ACTR2,ADAM15,ADAMTS16,ADCY1,ADD1,ADGRB1,AK7,AKAP5,ALCAM,ALDOA,AMELX,ANAPC2,ANK3,ANKRD27,ANXA7,APBB1,APBB2,APOE,AR,ARHGAP35,ARHGEF18,ARHGEF7,ARMC4,ARX,ATG7,ATL1,ATP6V0D1,ATXN2,AXIN2,B9D1,BAIAP2,BASP1,BBOF1,BBS10,BBS9,BCL11A,BMP2,BMP4,BMP5,BMP7,BMPR1B,BOC,BRSK1,BRSK2,BRWD1,C1QBP,CABP4,CACNA1A,CACNA1F,CADM1,CAMK2A,CAMK2B,CAMSAP1,CAP1,CAPZB,CBY1,CC2D2A,CCDC114,CCDC28…			GO: Biological Process
Cluster [-0.092:0.164]							GO: Biological Process	GO:0042176	regulation of protein catabolic process	10	ADAM8,ADAM9,ANAPC10,ANAPC15,ANAPC2,ANAPC4,ANAPC5,ANAPC7,APOE,ARNTL,ATP13A2,AURKA,AZIN1,AZIN2,BAG5,BANP,BARD1,BBS7,BCAP31,BRSK2,BUB1,BUB3,CAV3,CBLB,CCDC22,CCNB1,CD81,CDC16,CDC20,CDC23,CDC26,CDC27,CDC42,CDK1,CDKN1B,CDKN2A,CENPE,CENPF,COMMD1,CSNK1A1,CSNK2A1,CST3,CUL3,CUL4B,DACT1,DDRGK1,DEDD,DERL2,DERL3,DLGAP1,DNAAF4,DUSP1,DYNC1LI1,EDEM1,EDEM2,EGF,EGLN2,ERLEC1,EZR,FAF1,FBXL5,FBXO22,FBXO5,FBXW7,FHIT,F…			GO: Biological Process	GO:0007178	transmembrane receptor protein serine/threonine kinase signaling pathway	5.5867	ACVR1C,ADAM17,CAV1,CAV2,CDKN1C,CHRDL1,CHRDL2,DAB2,FBN1,FBN2,FOS,FSTL1,FSTL3,GATA4,GLG1,HES1,HIPK2,HTRA1,INHBA,IRAK1,KDR,LEF1,MTMR4,MYOCD,NEO1,NOTCH1,NOTCH2,ONECUT2,PDPK1,PRKCZ,PTPRK,RNF111,SIRT1,SLC33A1,SLC39A5,SMAD7,SNX25,SPTBN1,STRAP,SYNJ2BP,TGFB3,TGFBR2,TGFBR3,TGIF1,TRIM33,TRPS1,TWSG1,UBE2D1,VIM			GO: Biological Process	GO:0098660	inorganic ion transmembrane transport	10	ACACA,ACACB,ADAMTS8,AGT,AKAP6,AKAP7,AKAP9,ANO10,APOL1,AQP1,ARF1,ASIC1,ASIC3,ASPH,ATOX1,ATP1B2,ATP1B3,ATP2A1,ATP2B1,ATP2B3,ATP2B4,ATP2C1,ATP2C2,ATP4B,ATP5F1A,ATP5F1B,ATP5F1C,ATP5F1D,ATP5MC1,ATP5MC2,ATP5MC3,ATP5MF,ATP5MG,ATP5PB,ATP5PD,ATP5PF,ATP6AP1,ATP6V0A1,ATP6V0A2,ATP6V0C,ATP6V0D1,ATP6V1B1,ATP6V1G3,BAX,BBC3,BDKRB1,BEST1,BEST2,BEST3,BMP4,CACNA1B,CACNA1C,CACNA1E,CACNA1F,CACNA1G,CACNA1H,CACNA2D1,CA…			GO: Biological Process	GO:0006518	peptide metabolic process	10	AARS,ACE,ACE2,ACO1,ADAD1,ADAMTS13,AGO1,AGO4,AIMP1,AKT1,APLP1,ATF4,ATXN2,BACE2,BANK1,BDH2,BTG2,C1QBP,C9orf3,CALR,CARNS1,CARS,CARS2,CCL5,CD28,CDK5RAP1,CELF1,CELF4,CHAC1,CHCHD1,CLIC2,CLIC3,CLIC6,CLN5,CMA1,CNDP2,CNOT1,CNOT11,CNOT7,CNOT8,CNOT9,COA3,COPS5,CPE,CPM,CPN1,CPQ,CPXM1,CPXM2,CTIF,CTNS,CTSG,DAPK1,DAPK3,DARS2,DAZL,DDX1,DDX6,DENR,DHX29,DNAJC1,DPEP1,DTD1,ECE1,EEF1A2,EEF1D,EEF1E1,EEF2,EEF2K,EEFSEC,…			GO: Biological Process	GO:0016236	macroautophagy	10	ACIN1,ACTL6A,ALKBH5,ALPK1,AMBRA1,ATG101,ATG12,ATG16L1,ATG2A,ATG2B,ATG4C,ATG4D,ATG5,ATG9A,ATP13A2,ATP1B1,ATP5IF1,ATP6V0A1,ATP6V0C,ATP6V0E1,ATP6V1A,ATP6V1B1,ATP6V1B2,ATP6V1C2,ATP6V1G1,BECN1,BOC,C5,CA7,CALCOCO2,CAPNS1,CCDC36,CD93,CDC37,CHMP4A,CLEC16A,CLN3,CSNK2A2,CTSK,CTTN,DNAAF2,DYNLL1,EMC6,EPM2A,EXOC4,FANCL,FBXW7,FEZ1,FEZ2,FGFBP1,FZD5,GABARAP,GABARAPL2,GAPDH,GBA,GSK3A,HAX1,HDAC6,HIF1A,HILPDA,HK2,H…			GO: Biological Process	GO:0072359	circulatory system development	10	AAMP,ACTA2,ACTN2,ACVR1,ACVRL1,ADAM15,ADAM19,ADAMTS1,ADD1,ADGRB1,ADGRB2,ADIPOR2,ADM2,ADORA2B,ADRA1A,ADRA1B,AGTR2,AKAP6,ALDH1A2,ALOX12,AMOT,ANG,ANGPT4,ANKS6,ANPEP,ANXA3,APOB,APOD,APOE,APOH,ARHGAP24,ARHGEF15,ARMC4,ASB4,ATF2,ATG7,ATP5F1B,ATP5IF1,AXIN2,B4GALT1,B9D1,BASP1,BCAS3,BMP2,BMP4,BMP7,BMPR1A,BTG1,C5,CACNA1C,CALCA,CAMK2D,CAMP,CASP8,CBY1,CC2D2A,CCBE1,CCDC39,CCDC40,CCL11,CCL2,CCL24,CCL5,CCM2,CDC42…			GO: Biological Process
Category	ID	Title (or Source)	Cluster logP	Cluster GeneSet			GO: Biological Process	GO:0048870	cell motility	10	AAMP,ABCC1,ABHD2,ABHD6,ABI2,ABI3,ABL1,ACE,ACP5,ACVR1B,ACVRL1,ADAM10,ADAM15,ADAM8,ADAM9,ADARB1,ADCY3,AJUBA,AKAP4,ALKBH1,ALOX12,ALOX15B,AMOT,ANG,ANGPT1,ANGPT2,ANGPT4,ANXA1,ANXA5,AOC3,APBB1,APBB2,APCDD1,APEX1,APOB,APOD,APOE,ARAP3,ARHGAP18,ARHGAP24,ARHGAP4,ARHGAP5,ARHGDIB,ARHGEF5,ARHGEF7,ARL13B,ARPC2,ARRB2,ARX,ASCL1,ASPM,ASTN1,ATOH8,ATP1B1,ATP1B2,ATP2B4,ATP5F1B,AXL,AZU1,BAG4,BARHL1,BCAR1,BCAS3,BCL2,B…			GO: Biological Process	GO:0009887	animal organ morphogenesis	5.57747	ABLIM1,ACTA1,ALDH1A3,ANKRD11,AP2M1,ARID1A,ARL13B,ATP6V1B1,BASP1,BCL2L11,CARM1,CAV1,CCM2L,CD34,CELSR1,CHD7,COL5A1,CRIP1,CSGALNACT1,CTNNA1,CTNNA2,CXCR4,DAB2,DAG1,DCN,DICER1,DLG5,DSP,DVL2,EDAR,EFNA1,EFNB2,ELF3,EP300,EPHB4,EZR,FANCC,FBN1,FBN2,FGF18,FLNA,FOXF2,FZD6,GATA4,GLG1,HAS2,HEG1,HES1,HIPK2,HOXB1,HS2ST1,HTR2B,HTRA1,IL6,INHBA,IRX4,KDM5B,KDR,LAMA5,LAMB1,LEF1,LHX1,LIMS1,MDM4,MED12,MEIS1,MFN2,MICAL2…			GO: Biological Process	GO:0055080	cation homeostasis	10	ABCB6,ABCB7,ACO1,ADCYAP1R1,ADORA1,ADRA1B,AGT,AGTR1,AKAP6,ALAS2,ANK1,ANPEP,APLP2,ARF1,ASPH,ATOX1,ATP13A2,ATP1B2,ATP1B3,ATP2A1,ATP2B1,ATP2B3,ATP2B4,ATP2C1,ATP2C2,ATP4B,ATP5F1B,ATP6AP1,ATP6V0A1,ATP6V0A2,ATP6V0C,ATP6V0D1,ATP6V1B1,ATP6V1D,ATP6V1G3,AVPR1A,AVPR1B,AVPR2,BAK1,BAX,BBC3,BCAP31,BDH2,BDKRB1,BMP4,C7,CA12,CA7,CACNA1C,CACNA1F,CACNA1G,CACNA2D1,CACNB3,CALCA,CALCR,CALM1,CALM2,CALR,CAMK2D,CAPN3,CASR…			GO: Biological Process	GO:0009199	ribonucleoside triphosphate metabolic process	10	AK1,AK5,ALDOC,ATP1A2,ATP1B1,ATP5F1A,ATP5F1C,ATP5F1D,ATP5MC1,ATP5MC2,ATP5MF,ATP5MG,ATP5PB,ATP5PD,ATP5PF,ATP5PO,ATP6V0A2,ATP6V0A4,ATP6V1A,ATP6V1B2,BPGM,CAD,COX15,COX4I1,COX5A,COX5B,COX6B1,COX7A2L,COX7C,COX8A,CTNS,CYC1,DNAJC15,EIF6,ENO1,ENO3,ENTPD5,FBP1,FXN,GADD45GIP1,GALE,GALT,GCK,GPHN,GPI,HIF1A,HK1,HK2,HSPA8,INSR,KHK,LDHA,MIF,MLXIPL,MOCS1,MOCS2,MPI,MYH3,MYH7,MYH8,MYOG,NCOR1,NDUFA11,NDUFA12,NDUFA13…			GO: Biological Process	GO:0071417	cellular response to organonitrogen compound	10	AANAT,ABL1,ADCY1,ADCY4,ADCY6,AGTR1,AGTRAP,AKAP6,AKAP9,AKT2,AOC1,APEX1,APLP1,APRT,AQP1,AQP8,ARHGEF2,ATP2B4,ATP6AP1,ATP6V0A1,ATP6V0C,ATP6V0E1,ATP6V1A,ATP6V1B1,ATP6V1B2,ATP6V1C2,ATP6V1F,ATP6V1G1,ATP6V1G3,BAD,BAIAP2L1,BAIAP2L2,BGLAP,CAMK2A,CCL2,CCNA2,CDK2,CEACAM1,CIB2,CISH,COL16A1,COL1A1,COL1A2,COL4A1,COL4A6,COL6A1,CPS1,CTNNA1,CTNNB1,CYBA,CYP11B1,CYP11B2,DDC,DENND4C,DNM2,DNMT1,DNMT3A,DNMT3B,DRD1,EEF2…			GO: Biological Process	GO:0051674	localization of cell	10	AAMP,ABCC1,ABHD6,ABI3,ACP5,ACTN4,ACVR1,ACVR1B,ACVRL1,ADAM10,ADAM15,ADAM17,ADIPOQ,ADORA3,AGTR2,AKT2,ALOX12,AMOT,AMOTL1,ANG,ANGPT4,ANXA3,APBB1,APBB2,APCDD1,APOB,APOD,APOE,APOH,ARF4,ARHGAP24,ARHGAP5,ARHGEF5,ARHGEF7,ARSB,ARX,ASPM,ATOH8,ATP1B2,ATP5F1B,B4GALT1,BCAR1,BCAS3,BCR,BDKRB1,BIN2,BMP2,BMP4,BMP5,BRAT1,BRK1,BSG,BTC,BTG1,C16orf45,C1QBP,C5,C5AR2,CACNA1I,CALCA,CAMK2D,CAP1,CATSPER3,CATSPERD,CBLL1,CCB…			GO: Biological Process
GO: Biological Process	GO:0043434	response to peptide hormone	10	AANAT,ABCC8,ADCY1,ADCY2,ADCY3,ADCY4,ADCY6,ADCY8,ADCY9,ADRM1,AGT,AGTR2,AGTRAP,AHCYL1,AHSG,AKAP1,AKT1,AKT2,AKT3,ALDOB,ANXA5,APEX1,APOBEC1,APPL1,ASS1,ATP2A1,ATP6V0A4,ATP6V0B,ATP6V0C,ATP6V0D1,ATP6V0E1,ATP6V1C1,ATP6V1D,ATP6V1F,ATP6V1G3,BAIAP2L1,BCAR1,BMP7,BRAF,BSG,CA2,CCND3,CDC6,CDO1,CEACAM1,CISH,COL1A1,CPEB2,CPS1,CREB1,CRHBP,CRHR1,CRHR2,CSHL1,CTNNB1,CXCL12,CYC1,CYP11B1,CYP11B2,DAG1,DENND4C,EDN1,EEF2K…			GO: Biological Process	GO:0051094	positive regulation of developmental process	10	ABL1,ACACB,ACE,ACHE,ACIN1,ACSL6,ACVR1B,ACVR2A,ACVRL1,ADAM8,ADAM9,ADAMTS1,ADAMTS20,ADGRB1,ADGRB2,ADGRB3,ADGRL2,ADIRF,ADM2,ADNP,AGR2,ALOX12,ALOX15B,AMOT,ANAPC2,ANGPT2,ANGPT4,ANXA1,AP3B1,APBB1,APOB,APOE,ARHGEF7,ARNTL,ARPC2,ARX,ASB4,ASCL1,ASIC2,ASPM,ATF1,ATOH8,ATP6AP1,ATP8A2,AURKA,AVIL,AXIN2,AXL,BAIAP2,BCL2,BCL6,BCL9L,BIN1,BLOC1S6,BMP1,BMP6,BMP7,BNIP3,BOC,BRAF,BRINP1,BRINP2,C3,C5,C6,CAMK1,CAMK1D,CAPR…			GO: Biological Process	GO:0000122	negative regulation of transcription by RNA polymerase II	5.5631	ARID1A,ATF3,BHLHE40,BTG2,CAV1,CDKN1C,CHD8,CREBRF,CRY1,CXXC5,DDIT3,DICER1,DNMT3B,E2F7,EFNA1,EHMT1,ENO1,EP300,EZR,FOXP4,HDGF,HES1,HIPK2,HMGA2,HNRNPA2B1,IRF8,JARID2,JAZF1,JDP2,KANK2,KDM1A,KLF4,KLF5,LEF1,LMCD1,MDM4,MECP2,MEF2A,MSC,MYOCD,NCOA2,NCOR1,NEDD4,NFIC,NFIL3,NFKB1,NOC2L,NOTCH1,NOTCH2,NR2F6,NR4A2,PCGF6,PDE2A,PER2,PTCH1,REL,RFX5,RPS14,SFPQ,SIN3A,SIRT1,SMAD7,SMARCA4,SMYD2,SNAI2,SPEN,SPI1,SPOP,SQS…			GO: Biological Process	GO:0050804	modulation of chemical synaptic transmission	10	ABAT,ADIPOQ,ADNP,ADORA1,AGT,ANAPC2,ARF1,ASIC1,ATAD1,BCAN,BDNF,BRAF,CA7,CACNA1B,CACNA2D2,CACNG3,CACNG4,CAMK2A,CCL13,CD38,CEL,CELF4,CHRNA3,CHRNA4,CHRNA7,CHRNB2,CHRNB4,CLSTN1,CLSTN2,CNIH2,CNIH3,CNR1,CNR2,CNTN2,CNTNAP4,CPLX2,CREB1,CRH,CRHBP,CRHR1,CRHR2,CTNND2,CUX2,DBI,DGKI,DLG4,DMPK,DNM1,DRD1,DRD2,DRD4,EDN3,EGFR,EPHB2,ERBB4,FGF14,FMR1,GFAP,GIP,GLUL,GNAI2,GPM6B,GRIA1,GRIA2,GRIA4,GRIK3,GRIK5,GRIN1,GRIN…			GO: Biological Process	GO:0009116	nucleoside metabolic process	10	ACACA,ACACB,ACOT7,ACPP,ADK,ADSSL1,AHCY,AHCYL1,AK1,AK5,ALDOC,APOBEC3A,APOBEC3C,APRT,ATIC,ATP1A2,ATP1B1,ATP5F1A,ATP5F1C,ATP5F1D,ATP5MC1,ATP5MC2,ATP5MF,ATP5MG,ATP5PB,ATP5PD,ATP5PF,ATP5PO,ATP6V0A2,ATP6V0A4,ATP6V1A,ATP6V1B2,BPGM,CAD,CARD11,CDA,CMPK1,COX15,COX4I1,COX5A,COX5B,COX6B1,COX7A2L,COX7C,COX8A,CTNS,CYC1,DCAKD,DCTD,DERA,DGUOK,DLG1,DLG3,DLG4,DNAJC15,DNMT3B,DNPH1,DPYD,EIF6,ENO1,ENO3,ENTPD5,FBP1,FX…			GO: Biological Process	GO:0023014	signal transduction by protein phosphorylation	10	ABL1,ACE2,ACVR1C,ACVR2A,ADAM9,ADRA1A,ADRB3,AKAP13,AKAP9,ALOX12B,ANGPT1,ANKRD6,APOE,ARAF,ARHGEF6,ARRB1,ARRB2,ATF3,ATP6AP1,AVPI1,BANK1,BIRC7,BMP3,BMP5,BMP6,BMP7,BMP8B,BMPR1B,BMPR2,BRAF,BRAP,BTRC,C1QTNF1,C3,C3orf33,C5,CALM2,CALM3,CAMK2A,CAMK2B,CAMKK2,CAV3,CAVIN3,CBLC,CBS,CCKBR,CCL11,CCL16,CCL2,CCL20,CCL22,CCL24,CCL25,CCL4,CCL8,CCR1,CCR7,CD36,CD40,CD74,CD84,CDC42EP5,CDC42SE1,CDK1,CDK12,CDK5RAP3,CEACA…			GO: Biological Process	GO:0022603	regulation of anatomical structure morphogenesis	10	ACHE,ACTN4,ACVRL1,ADAMTS1,ADAMTS16,ADD1,ADGRB1,ADGRB2,ADIPOQ,ADM2,ADORA2B,AGTR2,AKAP5,ALDOA,ALOX12,AMELX,AMOT,ANAPC2,ANGPT4,ANKRD27,ANKRD6,ANXA3,ANXA7,AP2A1,AP2M1,AP2S1,APOE,APOH,AR,ARHGAP35,ARHGEF18,ARHGEF7,ASB4,ASPN,AXIN2,B4GALT1,BAIAP2,BASP1,BCL11A,BCR,BMP2,BMP4,BMP5,BMP7,BMPR1A,BRWD1,BTG1,C1QBP,C5,CACNA1A,CAMK1,CAMK2B,CAMP,CAMSAP1,CAPZB,CASP6,CCBE1,CCL11,CCL2,CCL24,CCL3,CCL5,CCL7,CCP110,CD53,…			GO: Biological Process
GO: Biological Process	GO:0051276	chromosome organization	10	ACD,ACIN1,ACTL6B,AGO4,AICDA,AIFM1,AKAP8,ANAPC10,ANAPC15,APBB1,APEX1,APOBEC1,ARID1B,ARID2,ARID5B,ASH1L,ATAD2,ATG5,ATR,ATXN3,BABAM1,BABAM2,BAHD1,BAP1,BAZ1B,BAZ2A,BCORL1,BECN1,BIRC5,BPTF,BRCA2,BRD1,BRD3,BRD4,BRD7,BRDT,BRMS1,BRMS1L,BRPF1,BRPF3,BUB1,BUB1B,BUB3,BUD23,CABIN1,CAMK2D,CARM1,CBX4,CBX8,CCT2,CCT3,CCT4,CCT6A,CCT7,CCT8,CD19,CDC26,CDC27,CDC6,CDC73,CDCA8,CDK1,CDKN2A,CDYL,CEBPG,CENPL,CENPO,CENPQ,C…			GO: Biological Process	GO:0007005	mitochondrion organization	10	ACIN1,ACTL6A,ADAMTS7,AFG3L2,AGTPBP1,AIFM1,AIFM2,AIP,ALKBH7,ANXA5,APOO,ARRB2,ASB2,ATCAY,ATG14,ATG2B,ATG4A,ATG4D,ATG9A,ATP13A2,ATP1B1,ATP2A1,ATP5F1B,BAG4,BCL2,BCL2L11,BID,BMF,BNIP3,BOC,C5,CA7,CAMK2A,CAPS,CASP8,CAV2,CCK,CD93,CDK5RAP1,CDKN2A,CHAF1B,CHCHD3,CHCHD4,CHCHD5,CHST3,CIDEB,CLVS1,CNP,COA3,COA4,COQ7,COX10,COX14,COX7A2L,COX8A,CRYAA,CSPG5,CTSK,CYCS,DARS2,DCN,DCTN6,DDHD1,DNAAF2,DNAJC19,DNM1L,DYNLL…			GO: Biological Process	GO:0001816	cytokine production	5.47824	ADAM17,ADCYAP1,AIM2,ANKRD17,ATF4,BCL10,BCL3,BTK,C5orf30,CCL5,CCM2L,CD2AP,CD34,CD83,CDH3,CRYBA1,CSK,CYLD,CYP1B1,DDIT3,DDX58,DDX60,EIF2AK2,EP300,ERBIN,EZR,FOXP1,GATA4,GBP1,GPR18,HEG1,HLA-A,HLA-B,HMGB2,HTR2B,IGF2BP3,IL1A,IL20RB,IL6,INHBA,IRAK1,IRF8,ISG15,KLF2,KLF4,KLRK1,LEF1,LRRFIP1,LSM14A,NCL,NFAT5,NFKB1,NOTCH1,NOTCH2,NUTF2,OPTN,PARK7,PIK3CD,PLCG2,POLR3G,PRKCZ,REL,RNF135,RORC,RSAD2,S100A9,SEMA7A,SH…			GO: Biological Process	GO:0006897	endocytosis	10	ABCA1,ABCA7,ABR,ACKR2,ACTB,ACTG1,ACTR2,ACTR3,ADD1,ADIPOQ,ADORA1,ADRB3,AHSG,ALOX15,AMBP,AMPH,ANKFY1,ANXA1,ANXA3,AP1S1,AP2A2,AP2B1,AP2M1,AP2S1,APLP1,APOB,APOBR,APOC1,APOC2,APOL1,ARF1,ARF6,ARFGAP1,ARPC5,ARRB1,ASGR2,ATAD1,ATG3,ATG7,ATP5F1B,ATP9A,ATP9B,AXL,AZU1,BCL2L1,BIN1,BIN2,BLK,BRK1,C4BPA,C4BPB,CALCA,CALCR,CALCRL,CALR,CAMK1D,CAP1,CARMIL1,CAV3,CCL13,CCL19,CCL21,CD14,CD163,CD302,CD3G,CD5,CD5L,CD6,CD…			GO: Biological Process	GO:0006091	generation of precursor metabolites and energy	10	ACADVL,ACO1,ACSM1,ADGRF5,ADIPOQ,ADRA1B,AGL,AKT1,ALDOC,AQP7,ATP5F1C,ATP5F1D,BAX,BNIP3,BPGM,CALM3,CAT,CAVIN3,CHCHD5,CISD1,COX15,COX4I1,COX5A,COX5B,COX6B1,COX7A2L,COX7C,COX8A,CS,CYB561,CYC1,DNAJC15,EIF6,ENO1,ENO3,ENTPD5,ETFA,ETFB,ETFDH,FASTKD3,FBP1,FECH,FXN,G6PC,GAA,GADD45GIP1,GALE,GALT,GCK,GFPT1,GIPR,GNAS,GPI,GSK3B,GYG1,HIF1A,HK1,HK2,IDH1,IDH3B,IDH3G,IMMP2L,INPP5K,INSR,IRS2,KHK,KL,LDHA,MCHR1,MDH1,M…			GO: Biological Process	GO:0044255	cellular lipid metabolic process	10	AADAC,ABCC1,ABCD1,ABCD2,ABHD12,ABHD3,ABHD6,ACAA2,ACACA,ACAD10,ACADL,ACADS,ACADVL,ACER1,ACHE,ACOT11,ACOT2,ACOT8,ACSBG2,ACSL1,ACSL5,ACSM1,ACSM2B,ACSM3,ACSS1,ACSS2,ADH4,ADIPOR2,AGPAT2,AGPAT3,AGTR1,AKT2,ALDH1A1,ALDH1A2,ALDH1A3,ALDH3B2,ALG1,ALG12,ALG13,ALG14,ALG2,ALG3,ALG5,ALG6,ALOX12B,ALOX15B,ALOX5,ALOX5AP,ALOXE3,AMACR,AMBRA1,ANG,ANGPTL8,APOA5,APOD,APOE,ARSA,ARSB,ARSD,ARSE,ARSF,ARSI,ARV1,ASAH1,ASAH2,…			GO: Biological Process	GO:0007169	transmembrane receptor protein tyrosine kinase signaling pathway	10	ABI1,ACTB,ACTR2,ADAM10,ADAM17,ADAMTS3,ADIPOQ,ADRM1,AFAP1L2,AGR2,AGTR2,AHSG,AKT1S1,AKT2,ALK,ANGPT4,ANGPTL1,AP2A1,AP2M1,AP2S1,AP3S1,APH1B,APLP2,APOD,AR,ARF4,ARHGEF7,ARPC1A,ARPC4,ATP6AP1,ATP6V0A1,ATP6V0A4,ATP6V0B,ATP6V0C,ATP6V0D1,ATP6V0E1,ATP6V1B2,ATP6V1C1,ATP6V1C2,ATP6V1E1,ATP6V1F,ATP6V1H,ATXN7,BAIAP2,BAIAP2L1,BCAR1,BCR,BDKRB2,BMP2,BMP4,BMP5,BMX,BRK1,BTC,BTK,CAV2,CBL,CBLC,CCBE1,CCL2,CD3E,CD4,CD7,CD…			GO: Biological Process
GO: Biological Process	GO:1903827	regulation of cellular protein localization	10	ABCA12,ACSM6,AGTR2,AKAP1,AKAP6,AKT1,AKT2,AP2M1,APC2,APPL1,AR,ARF6,ASPH,ASTN2,ATG13,ATP13A2,AXIN1,BAD,BAMBI,BAP1,BBC3,BCAS3,BCL2,BCL2L1,BCL2L11,BECN1,BID,BMP4,BMP6,BMP7,BRSK2,CAMK4,CASP8,CAV3,CCDC22,CCL13,CCL19,CCT2,CCT3,CCT4,CCT6A,CCT7,CCT8,CD27,CD36,CDC42,CDK1,CDK5,CDK5RAP3,CDKL2,CDKN2A,CEACAM1,CEP131,CEP72,CHP1,CIB1,CLDN18,CLIP3,CREB3,CRIPT,CSF3,CSNK2A2,CTNNB1,CTSK,CYB5R1,CYLD,DAB2IP,DACT1,DACT…			GO: Biological Process	GO:0030163	protein catabolic process	10	ACE,ACE2,ACR,ADAM8,ADAM9,ADAMTS7,AGXT,AMBP,AMFR,ANAPC10,ANAPC15,ANAPC2,ANAPC4,ANAPC5,ANAPC7,ANKZF1,APOB,APOE,ARNTL,ARRB2,ASB2,ATE1,ATP13A2,AURKA,AZIN1,AZIN2,BAG5,BANP,BARD1,BBS7,BCAP31,BFAR,BNIP3,BRSK2,BUB1,BUB3,CACUL1,CASP8,CAV3,CBL,CBLB,CBLC,CCDC22,CCNB1,CCNF,CD81,CDC16,CDC20,CDC23,CDC26,CDC27,CDC42,CDK1,CDKN1B,CDKN2A,CEACAM1,CENPE,CENPF,CHMP4B,CHMP4C,CLOCK,CLPP,CLPX,COMMD1,COPS3,CPVL,CSNK1A1,C…			GO: Biological Process	GO:0061061	muscle structure development	5.47032	ACTA1,ACTG1,AKAP13,ANKRD17,ARID1A,ATF3,BASP1,BTG1,BTG2,CAV1,CAV2,CCM2L,CD164,CHD7,COL6A3,CTNNA1,CTNNA2,DCN,DDIT3,DES,DICER1,DSP,EEF2,EFNB2,EHD1,EP300,ERBB3,FLNB,FOS,FOXN2,FXR1,GATA4,HEG1,HES1,HNRNPU,IL6,JPH1,KDM1A,KLF5,KRT19,LAMA5,LEF1,LMNA,MBNL1,MED20,MEF2A,MORF4L2,MRTFB,MSC,MYH9,MYL6,MYOCD,NCOR1,NEO1,NGFR,NOTCH1,NUPR1,PDGFRB,PRDM6,PTBP1,SDC1,SGCD,SIRT1,SLC9A1,SMAD7,SMARCA4,STIM1,SVIL,TGFBR2,TGF…			GO: Biological Process	GO:1904667	negative regulation of ubiquitin protein ligase activity	10	ANAPC15,ANAPC16,ANAPC2,ANAPC4,ANAPC5,CDC16,CDC27,CDK1,FBXO5,FZR1,MAD2L1,PSMA1,PSMA2,PSMA3,PSMA4,PSMA5,PSMA6,PSMA7,PSMB1,PSMB10,PSMB2,PSMB3,PSMB4,PSMB5,PSMB6,PSMB7,PSMC2,PSMC3,PSMC4,PSMC5,PSMC6,PSMD10,PSMD11,PSMD12,PSMD13,PSMD14,PSMD2,PSMD3,PSMD6,PSMD7,PSMD8,PSMD9,PSME1,PSMF1,UBA52,UBB,UBC,UBE2D1,USP44			GO: Biological Process	GO:1901566	organonitrogen compound biosynthetic process	10	AARS,ABHD3,ACACA,ACACB,ACER3,ACO1,ACOT7,ACR,ACSL3,ADAD1,ADCY10,ADCY8,ADCY9,ADI1,ADK,ADORA2A,ADSSL1,AGMAT,AGO1,AGO4,AGXT,AHCY,AIMP1,AK1,AK5,AKAP5,AKT1,ALAD,ALAS1,ALAS2,ALDH18A1,ALOXE3,AMPD1,ANGPT1,ANK1,AP2A1,APLP1,APOA2,APRT,ARG1,ASL,ASNS,ASPG,ASS1,ATF4,ATG7,ATIC,ATP5F1A,ATP5F1C,ATP5F1D,ATP5MC1,ATP5MC2,ATP5MF,ATP5MG,ATP5PB,ATP5PD,ATP5PF,ATP5PO,ATP6V0A2,ATP6V0A4,ATXN2,AZIN2,B3GAT1,B3GNT3,B3GNT5,B3G…			GO: Biological Process	GO:1902533	positive regulation of intracellular signal transduction	10	ABL1,ABRA,ACTN4,ADAM9,ADGRV1,ADRA1A,ADRB3,AGTR1,AKAP12,AKAP13,AKAP6,ALOX12B,ALS2,ANGPT1,ANKRD17,ANKRD6,APOL3,ARAF,ARFGEF1,ARRB1,ARRB2,ATP2C1,ATP6AP1,AVPI1,BAD,BANK1,BECN1,BIRC2,BIRC3,BIRC7,BMF,BRAF,BST2,BUB1,C1QBP,C1QTNF1,C3,C5,CALM2,CALM3,CALR,CARD10,CARD11,CARD14,CASP10,CAVIN3,CBL,CC2D1A,CCL11,CCL16,CCL2,CCL20,CCL22,CCL24,CCL25,CCL4,CCL8,CCR1,CCR7,CD28,CD36,CD3E,CD4,CD40,CD74,CD84,CD8A,CDK1,CDK…			GO: Biological Process	GO:0098655	cation transmembrane transport	10	ACACA,ACTN2,ACTN4,AHNAK,AKAP6,ANK3,ANO1,ARF1,ASIC2,ASIC3,ASPH,ATOX1,ATP12A,ATP13A1,ATP13A2,ATP13A4,ATP1B2,ATP2A1,ATP2A2,ATP2A3,ATP2B3,ATP2C1,ATP2C2,ATP4A,ATP4B,ATP5F1A,ATP5F1B,ATP5F1D,ATP5MG,ATP5PO,ATP6AP1,ATP6V0A1,ATP6V0A4,ATP6V0B,ATP6V0C,ATP6V0D1,ATP6V0E1,ATP6V1B2,ATP6V1C1,ATP6V1C2,ATP6V1E1,ATP6V1F,ATP6V1H,BBC3,BDKRB1,BMP4,BPIFA1,CACFD1,CACNA1A,CACNA1C,CACNA1F,CACNA1H,CACNA1I,CACNA1S,CACNA2D1,C…			GO: Biological Process
GO: Biological Process	GO:0030162	regulation of proteolysis	10	A2M,ADORA2A,ADRM1,AGT,AHSG,AIFM1,AKT1,AKT2,ALOX12,AMBP,ANAPC10,ANAPC15,ANAPC16,ANAPC2,ANAPC7,ANGPTL8,ANKS1A,ANTXR1,APOE,APOPT1,AQP1,ARAF,ARL6IP5,ARRB2,ASPH,ATP13A2,ATRAID,AXIN1,BAD,BAG5,BAK1,BAX,BBC3,BBS7,BCL2A1,BCL2L1,BCL2L10,BCL2L11,BCL2L13,BEX3,BID,BIRC5,BOK,BST2,BTRC,BUB1,BUB1B,BUB3,C1QBP,C3AR1,C4BPB,C5AR2,C6,C7,C8B,CAPN3,CARD8,CASP1,CASP2,CASP8,CAV3,CCBE1,CCDC22,CD109,CD27,CD59,CDC16,CDC26,C…			GO: Biological Process	GO:0040008	regulation of growth	10	ABL1,ACACB,ACTL6A,ACVR1B,ACVRL1,ADAM10,ADAM15,ADNP,ADNP2,ADRB3,AES,AFG3L2,AGR2,AHSG,ALMS1,ALOX12,ALOX15B,ANAPC2,APBB1,APBB2,APOE,APP,ARHGAP4,ARHGEF11,ARX,ATP8A2,ATRN,AZGP1,BCAR1,BCL2,BCL2L11,BCL6,BLZF1,BNIPL,BST2,C3,CAPRIN2,CARM1,CAV3,CCN2,CCN4,CCN6,CCNB1,CD38,CD44,CD81,CDA,CDC42,CDHR2,CDK1,CDK11A,CDK5,CDKL5,CDKN1A,CDKN1B,CDKN2A,CDKN2C,CEACAM1,CELF1,CGREF1,CHPT1,CIB1,CLSTN3,CNTF,COL14A1,COLQ,CPNE…			GO: Biological Process	GO:0000278	mitotic cell cycle	5.39558	ACTR8,ADAM17,ANKRD17,ARHGEF10,ARID3A,ASNS,BIRC5,BRCA2,BRD4,BRINP3,BTG2,CALM2,CARM1,CAV2,CCNG1,CD2AP,CDC25B,CDKN1C,CEP135,CEP55,CKS2,CLIP1,CNOT4,CYLD,DSN1,DYNC1H1,DYNC1LI1,DYNLL1,DYNLT3,E2F7,EP300,FIGN,FLNA,FOXN3,GBF1,GOLGA2,HES1,HMGA2,HMMR,IL1A,INHBA,KANK2,KIF20A,KIF23,KPNB1,LATS2,LMNA,LZTS2,MCM3,MCM6,MCM7,MDM4,MSH2,NCAPD2,NCAPD3,NEK7,NEK9,NSUN2,NUP205,NUP210,NUP214,NUP54,NUP58,OPTN,PCNT,PDCD6IP,…			GO: Biological Process	GO:0009057	macromolecule catabolic process	10	ACAN,ACE,ACE2,ACR,ADAM8,ADAM9,ADRA1B,AGAP2,AGL,AGO2,AGO4,AGXT,AIFM1,AKT1,AMBP,AMFR,ANAPC15,ANAPC16,ANAPC2,ANAPC4,ANAPC5,ANKIB1,ANKS1A,APAF1,APC,APOB,ARRB1,ARSB,ASB2,ATG7,ATP13A2,ATP5IF1,ATRAID,AUH,AUP1,BAP1,BAX,BBS7,BCAN,BCAP31,BGN,BIRC2,BRSK2,BTRC,BUB1,C18orf25,C4BPA,C4BPB,CALM1,CALM2,CASC3,CASP3,CASP8,CAV3,CBLB,CBLC,CCDC22,CCDC47,CCNF,CD81,CDC16,CDC27,CDC34,CDK1,CDK5RAP3,CENPE,CENPF,CHFR,CHI3L1…			GO: Biological Process	GO:0009144	purine nucleoside triphosphate metabolic process	10	ADK,AK1,AK5,ALDOC,ATP1A2,ATP1B1,ATP5F1A,ATP5F1C,ATP5F1D,ATP5MC1,ATP5MC2,ATP5MF,ATP5MG,ATP5PB,ATP5PD,ATP5PF,ATP5PO,ATP6V0A2,ATP6V0A4,ATP6V1A,ATP6V1B2,BPGM,COX15,COX4I1,COX5A,COX5B,COX6B1,COX7A2L,COX7C,COX8A,CTNS,CYC1,DGUOK,DNAJC15,EIF6,ENO1,ENO3,ENTPD5,FBP1,FXN,GADD45GIP1,GALE,GALT,GCK,GPHN,GPI,HIF1A,HK1,HK2,HSPA8,INSR,KHK,LDHA,MIF,MLXIPL,MOCS1,MOCS2,MPI,MYH3,MYH7,MYH8,MYOG,NCOR1,NDUFA11,NDUFA12,N…			GO: Biological Process	GO:0006082	organic acid metabolic process	10	AADAT,AARS,AASS,ABAT,ABCB11,ABCC1,ABCD1,ABCD2,ABHD12,ABHD14B,ACAA2,ACACA,ACAD10,ACADL,ACADS,ACADVL,ACAN,ACAT1,ACO1,ACO2,ACOT11,ACOT2,ACOT8,ACSBG2,ACSL1,ACSL5,ACSM1,ACSM2B,ACSM3,ACSS1,ACSS2,ACY1,ADHFE1,ADI1,ADIPOR2,ADPGK,ADSSL1,AGMAT,AGXT2,AHCYL2,AKR1A1,AKR1D1,AKT2,ALDH18A1,ALDH1A1,ALDH1A2,ALDH1A3,ALDH4A1,ALDH9A1,ALDOC,ALOX12B,ALOX15B,ALOX5,ALOX5AP,ALOXE3,AMACR,AMDHD1,AMDHD2,ANGPT1,APOA5,ARSB,ART4…			GO: Biological Process	GO:0006082	organic acid metabolic process	10	AACS,AADAT,AASS,ABAT,ABCC1,ABCD1,ABCD2,ABCD3,ABCG2,ABHD14B,ABHD5,ACAA1,ACAA2,ACACA,ACAD10,ACAD8,ACADL,ACADS,ACADVL,ACAN,ACAT1,ACO2,ACOT11,ACOT4,ACOT7,ACOT8,ACOX3,ACSBG1,ACSL3,ACSL6,ACSM1,ACSM6,ACY1,ADH7,ADI1,ADIPOQ,ADIPOR2,ADPGK,ADSS,ADSSL1,AFMID,AGXT,AGXT2,AHCY,AKR1A1,AKR1C2,AKR1D1,AKT2,ALDH1A1,ALDH1A2,ALDH1L1,ALDH4A1,ALDH6A1,ALDH7A1,ALDOA,ALDOB,ALKBH7,ALOX12,ALOX15,ALOXE3,AMDHD1,AMDHD2,APIP,APO…			GO: Biological Process
GO: Biological Process	GO:0051338	regulation of transferase activity	10	ABI1,ACD,ACE,ACSL1,ADAM17,ADCY1,ADCY2,ADCY3,ADCY4,ADCY6,ADCY8,ADCY9,ADNP,ADORA2A,ADORA2B,AGAP2,AGT,AHSG,AKAP13,AKAP6,AKT1,AKT1S1,ALS2,ANAPC10,ANAPC15,ANAPC16,ANAPC2,ANAPC7,ANG,ANGPT4,APOE,ARAF,ARHGEF5,ATG14,ATRAID,AVPI1,AXIN1,AZU1,BAD,BAG5,BAK1,BAX,BGN,BMP4,BMP7,BRAF,BTRC,BUB1B,BUB3,C1GALT1C1,CAB39,CACUL1,CALM3,CAMK2N1,CAMKK2,CARD10,CAV3,CBLC,CCDC88A,CCL19,CCL21,CCNB3,CCND3,CCNE2,CCNG1,CCNL2,CCNT…			GO: Biological Process	GO:0045597	positive regulation of cell differentiation	10	ABL1,ACE,ACHE,ACIN1,ACSL6,ACVR1B,ACVR2A,ACVRL1,ADAM8,ADAMTS1,ADAMTS20,ADIRF,ADNP,ALOX12,ALOX15B,ANAPC2,ANXA1,AP3B1,APBB1,APOB,APOE,ARHGEF7,ARNTL,ARPC2,ASB4,ASCL1,ASPM,ATF1,ATOH8,ATP6AP1,ATP8A2,AURKA,AVIL,AXIN2,AXL,BAIAP2,BCL2,BCL6,BCL9L,BIN1,BLOC1S6,BMP6,BMP7,BOC,BRAF,BRINP1,BRINP2,CAMK1,CAMK1D,CAPRIN1,CAPRIN2,CARM1,CASP6,CASP8,CAV3,CBFA2T2,CCDC3,CCL19,CCN2,CCN4,CD27,CD276,CD34,CD53,CD74,CDC42,CD…			GO: Biological Process	GO:0000184	nuclear-transcribed mRNA catabolic process, nonsense-mediated decay	5.38218	EIF4G1,EXOSC10,NCBP2,PYM1,RPL13,RPL19,RPL23,RPL27,RPL27A,RPL3,RPL30,RPL31,RPL32,RPL37,RPL9,RPLP1,RPS12,RPS14,RPS19,RPS26,RPS6,RPS7,SMG1,UHMK1			GO: Biological Process	GO:0006605	protein targeting	10	ACSM6,ADAR,ADORA1,AFG3L2,AGT,AKAP1,AKAP6,AKT1,ANK1,AP3B1,APOD,ATG3,ATP2C2,ATP5IF1,AXIN2,BAG4,BAP1,BCL3,BMP4,BMP7,BSG,C1QTNF3,CABP1,CACNB1,CBLB,CCDC22,CCL13,CCL19,CCN3,CD27,CDC37,CDK1,CDKL2,CDKN1A,CEP57,CFL1,CHCHD4,CHERP,CHM,CHMP4A,CRY2,CSE1L,CSF3,CSNK2A2,CYB5R1,CYLD,DAB2IP,DACT1,DMAP1,DMTN,DNAJC19,DRD1,DUSP18,ECT2,EDA,EGF,EGFR,ELMOD1,EMD,ERBB4,EXOC4,FAF1,FAM89B,FGF9,FIS1,FLNA,FOLR2,FYB1,GABARAP,G…			GO: Biological Process	GO:0051186	cofactor metabolic process	5.85082	ACAA2,ACACA,ACACB,ACOT13,ACOT7,ACOT9,ACSBG2,ACSL1,ACSL3,ACSL6,ACSS2,AHCY,AHCYL1,AKR1B10,ALAD,ALAS1,ALAS2,ALDH1L1,ALDOC,AMBP,ANK1,ATIC,BAAT,BDH2,BLVRA,BLVRB,BPGM,CBR1,CBR3,CBR4,CIAO1,CIAO2A,CIAO2B,CIAO3,CIAPIN1,COQ2,COQ4,COQ6,COX15,CPOX,CRYZL1,CS,CYP2A13,CYP2A6,DCAKD,DERA,DMGDH,EIF6,ELOVL5,ENO1,ENO3,ENTPD5,FASN,FBP1,FECH,FPGS,FXN,G6PD,GALE,GALT,GAMT,GART,GCDH,GCK,GLYAT,GPHN,GPI,HAAO,HACD1,HACD2,HE…			GO: Biological Process	GO:1901698	response to nitrogen compound	10	AANAT,AARS,ABAT,ABL1,ACVR1C,ADAR,ADCY1,ADCY4,ADCY6,AGTR1,AGTRAP,AIFM1,AKAP6,AKAP9,AKT2,AOC1,APEX1,APLP1,APRT,AQP1,AQP8,ARHGEF2,ASCL1,ATP2A1,ATP2A2,ATP2B4,ATP6AP1,ATP6V0A1,ATP6V0C,ATP6V0E1,ATP6V1A,ATP6V1B1,ATP6V1B2,ATP6V1C2,ATP6V1F,ATP6V1G1,ATP6V1G3,AVPR1A,AVPR1B,AVPR2,BAD,BAIAP2L1,BAIAP2L2,BGLAP,BIRC2,BMP7,BRAF,BTG2,CACYBP,CAD,CALM2,CALM3,CAMK2A,CARM1,CBS,CCL2,CCNA2,CCND3,CCR7,CDK1,CDK2,CDKN1B,CD…			GO: Biological Process	GO:0051270	regulation of cellular component movement	10	AAMP,ABCC1,ABHD6,ABI3,ACP5,ACTN4,ACVR1,ACVR1B,ACVRL1,ADAM10,ADAM15,ADAM17,ADIPOQ,ADORA3,AGTR2,AKAP6,AKT2,ALOX12,AMOT,AMOTL1,ANGPT4,ANXA3,APOD,APOE,APOH,ARHGAP5,ARHGEF7,ARMC4,ARSB,ATOH8,ATP2A2,B4GALT1,BCAR1,BCAS3,BCR,BDKRB1,BMP2,BMP4,BMP5,BTC,C16orf45,C1QBP,C5,C5AR2,CACNA1C,CAMK2D,CASQ2,CBLL1,CCBE1,CCDC39,CCDC40,CCL11,CCL19,CCL2,CCL20,CCL21,CCL24,CCL25,CCL26,CCL28,CCL3,CCL4,CCL5,CCL7,CCL8,CCR7,CD2…			GO: Biological Process
GO: Biological Process	GO:1904589	regulation of protein import	10	AGTR2,AKAP1,AKAP6,APC2,ARHGEF5,AXIN1,BAMBI,BMP4,BMP6,BMP7,CCDC22,CCL19,CD27,CD36,CDK1,CEACAM1,CHP1,CREB3,CSF3,CYLD,DAB2IP,DACT1,DACT3,DMAP1,DYRK2,ECT2,EDA,FAF1,FAM89B,GLI3,GNAQ,HCLS1,HDAC3,HNRNPM,HSP90AB1,HSPA8,IGF1,IL10,IL18R1,IL23A,IPO5,JUP,KPNA1,LGALS9,MAPK7,MAVS,MBTPS1,MDFI,MED1,MTOR,NF1,NFKBIA,NODAL,NUP54,NUP62,NUTF2,OGG1,PARP10,PBLD,PDCD5,PDE2A,PIK3R2,PKD1,PKIA,PKIG,PPM1A,PPM1B,PPP2CA,PPP3C…			GO: Biological Process	GO:0060341	regulation of cellular localization	10	AAAS,ABAT,ABL1,ACHE,ACSL3,ACTL6A,ACVR2A,ADAM8,ADAM9,ADCYAP1R1,ADORA2B,AGR2,AKAP1,AKAP8L,ALOX15B,ANG,ANGPT1,ANO1,ANXA1,ANXA4,ANXA5,AP1G1,APBB1,APOA2,APOD,APPL1,ARF6,ARFIP1,ARHGEF7,ARL2,ARNTL,ASPH,ATP13A2,ATP6AP1,AXIN2,BAG4,BANK1,BARD1,BCAP31,BCAS3,BCL2,BCL2L11,BCR,BET1L,BGLAP,BID,BIRC5,BLK,BMF,BMP6,BMP7,BRAF,BRSK2,BST2,BTN1A1,C1QTNF1,C5,CABP1,CACNA1A,CACNA1D,CACNA1H,CACNA1I,CADPS,CADPS2,CALM1,CALM…			GO: Biological Process	GO:0042493	response to drug	5.36253	ABCA3,ABCC1,ABCC4,ACSL1,ADAM17,AIM2,ALAD,ALDH3A1,BLMH,CAD,CAV1,CCL5,CDH3,CPS1,CROT,DAB1,DDIT3,DNMT3B,EEF2,EP300,FOS,GAL,GATA4,GCLM,GNPAT,HADHA,HMGA2,HMGB2,HTR2B,IL6,INHBA,KCNQ1,KDR,LOX,LYST,MCM7,MDK,OTC,PARK7,PDE2A,PDE3A,PDZK1,PPOX,PPP1R12A,PRKCB,PTCH1,RASA1,SCN11A,SLC22A3,SLC22A5,SLC47A1,SLC47A2,SLC9A1,SOCS3,SRP14,STAT3,TFRC,TGFBR2,TGIF1,TXNIP,VAV3,XBP1			GO: Biological Process	GO:0060548	negative regulation of cell death	10	AARS,ABCB1,ABCC1,ACTC1,ACVR1,ADAM8,ADAR,ADCYAP1R1,ADNP,ADORA1,AGAP2,AGO4,AGT,AGTR1,AIPL1,AKT1,ALOX12,ANGPT4,ANXA1,APBB2,APC,API5,AQP1,AR,ARHGEF2,ARRB1,ASCL1,ASNS,ATG7,ATP13A2,AXL,AZU1,BAG3,BAG4,BAX,BCL10,BCL11B,BCL2A1,BCL2L1,BCL2L10,BCL3,BDNF,BEX3,BIRC2,BIRC6,BLK,BLM,BMP4,BMP7,BNIP1,BNIP2,BRAF,BTBD10,CABIN1,CACYBP,CAMK1D,CAPN3,CASP3,CASP8,CAT,CBS,CBX4,CCL19,CCL21,CCL5,CCN3,CCN4,CCN6,CD27,CD34,CD3…			GO: Biological Process	GO:1901652	response to peptide	5.83011	ABCC8,ADCY8,ADCY9,ADIPOQ,ADRM1,AGTRAP,AHCYL1,AKAP1,AKT1,AKT3,ANKRD26,ANXA1,ANXA5,AP3S1,APRT,ARG1,ASS1,ATP2A1,ATP6AP1,ATP6V0A2,ATP6V0A4,ATP6V0B,ATP6V0C,ATP6V0D1,ATP6V1A,ATP6V1B2,ATP6V1F,BAIAP2,BCAR1,BMP7,BRAF,BSG,BTG2,CA2,CACYBP,CAD,CAMK2A,CARD9,CAT,CCL2,CCL5,CCN2,CCND3,CDC5L,CDK2,CITED1,CREB1,CRHR1,CRY1,CSHL1,CSK,CTSB,CXCL12,CYC1,CYP11B2,CYP27B1,DENND4C,EEF2K,EGR1,EIF2B1,EIF2B2,EIF2B3,EIF2B4,EIF2…			GO: Biological Process	GO:0070482	response to oxygen levels	10	ABAT,ACAA2,ACOT2,ACTN4,AGTRAP,AIFM1,ALAS2,ALKBH5,ALOX5,ANG,ANGPT2,ANGPT4,APOLD1,AQP1,ARNT2,ASCL2,ATP1B1,BAD,BECN1,BIRC2,BMP7,CA9,CBFA2T3,CBS,CCL2,CCNA2,CD34,CD38,CDK4,CDKN1B,CHRNA4,CHRNB2,CIAO3,COL1A1,COMMD1,CREBBP,CUL2,CXCL12,CYBB,CYGB,DDIT4,DNMT3A,DNMT3B,DRD1,DRD2,ECE1,EDNRA,EEF2K,EGLN2,EIF4EBP1,ELOB,ENDOG,ENG,ERCC2,ERO1A,FAM162A,FLT1,FOSL2,GNB1,GNGT1,GPR182,HIF1A,HIF1AN,HIF3A,HSD11B2,HSP90B1,H…			GO: Biological Process	GO:0030334	regulation of cell migration	10	AAMP,ABCC1,ABHD6,ABI3,ACP5,ACTN4,ACVR1,ACVR1B,ACVRL1,ADAM10,ADAM15,ADAM17,ADIPOQ,ADORA3,AGTR2,AKT2,ALOX12,AMOT,AMOTL1,ANGPT4,ANXA3,APOD,APOE,APOH,ARHGAP5,ARHGEF7,ARSB,ATOH8,BCAR1,BCAS3,BCR,BDKRB1,BMP2,BMP4,BMP5,C16orf45,C1QBP,C5,C5AR2,CAMK2D,CBLL1,CCBE1,CCL11,CCL19,CCL2,CCL20,CCL21,CCL24,CCL25,CCL26,CCL28,CCL3,CCL4,CCL5,CCL7,CCL8,CCR7,CD274,CDH1,CDH13,CDK5,CEMIP,CGA,CHRD,CITED2,COL3A1,CORO1A,CSF1…			GO: Biological Process
GO: Biological Process	GO:0044403	symbiont process	10	AAAS,ABI1,ACOT8,ALB,AMBP,AP1M1,APOA2,APOBEC3G,APOE,AQP1,ATF7IP,ATG16L1,ATG5,ATP6V0C,AZU1,BAD,BANF1,BAX,BCL2,BCL2L1,BCL2L11,BECN1,BIN1,BNIP3,BRD4,BST2,BTRC,BUB1,C19orf66,C1QBP,CALCOCO2,CAMLG,CARM1,CASP8,CCL1,CCL3,CCL4,CCNT1,CCR3,CD209,CD36,CD4,CD81,CEACAM1,CFL1,CFLAR,CHMP1A,CHMP2A,CHMP2B,CHMP4A,CHMP4C,CHMP7,CLDN1,CLEC4M,CLEC5A,COPS6,CPSF4,CR1,CREB1,CREB3,CREBBP,CRTC1,CTBP1,CUL1,CUL2,CUL4A,CXCL6,CX…			GO: Biological Process	GO:0009894	regulation of catabolic process	10	ABCD2,ABHD5,ABL1,ACACB,ACSL5,ACTL6A,ADAM8,ADAM9,ADRA1B,AIFM1,ANAPC10,ANAPC15,ANAPC2,ANAPC4,ANAPC5,ANAPC7,APAF1,APOA2,APOA5,APOC2,APOE,ARNTL,ATG14,ATP13A2,ATP2B4,ATP6V0A2,ATP6V0C,ATP6V0D1,ATP6V0E1,ATP6V1B1,ATP6V1C1,ATP6V1E1,AURKA,AZIN1,AZIN2,BAG5,BANP,BARD1,BBS7,BCAP31,BCL2,BNIP3,BPGM,BRSK2,BSCL2,BUB1,BUB3,CALCOCO2,CAPNS1,CASP1,CASP3,CAV3,CBLB,CCDC22,CCNB1,CD81,CDC16,CDC20,CDC23,CDC26,CDC27,CDC42,…			GO: Biological Process	GO:0001817	regulation of cytokine production	5.31103	ADAM17,ADCYAP1,AIM2,ANKRD17,ATF4,BCL10,BCL3,BTK,C5orf30,CCL5,CCM2L,CD2AP,CD34,CD83,CDH3,CRYBA1,CSK,CYLD,CYP1B1,DDIT3,DDX58,DDX60,EIF2AK2,EP300,ERBIN,EZR,FOXP1,GATA4,GBP1,GPR18,HEG1,HLA-A,HLA-B,HMGB2,HTR2B,IGF2BP3,IL1A,IL20RB,IL6,INHBA,IRAK1,IRF8,ISG15,KLF2,KLF4,KLRK1,LEF1,LRRFIP1,LSM14A,NCL,NFKB1,NUTF2,PARK7,PLCG2,POLR3G,PRKCZ,REL,RNF135,RSAD2,SEMA7A,SH2D1B,SIRT1,SNAI2,SOCS5,SPTBN1,STAT5A,SULF2,T…			GO: Biological Process	GO:0050767	regulation of neurogenesis	10	ACE,ACSL6,ACTR3,ADGRB3,ADGRG1,ADNP,AKT1,ANAPC2,APBB1,ARF1,ARF6,ARHGEF2,ARSB,ASAP1,ASCL1,ASPA,ASPM,AVIL,BCL11A,BCL11B,BDNF,BIN1,BMP4,BMP7,BMPR2,BNIP2,BRAF,CALR,CAMK1D,CAPRIN1,CAPRIN2,CARM1,CASZ1,CCDC88A,CCL5,CDH2,CDH4,CDK1,CDK5RAP1,CDK5RAP2,CDK5RAP3,CDKL3,CDKL5,CDON,CFL1,CHODL,CHRNA3,CHRNB2,CIT,CLCF1,CNR1,CNTF,CNTN2,COL3A1,CPNE6,CREB1,CRMP1,CRX,CSF1,CSHL1,CSPG4,CTNNA1,CTTN,CUL7,CUX1,CUX2,CXCL6,DAB…			GO: Biological Process	GO:0043434	response to peptide hormone	5.81159	ABCC8,ADCY8,ADCY9,ADIPOQ,ADRM1,AGTRAP,AHCYL1,AKAP1,AKT1,AKT3,ANKRD26,ANXA1,ANXA5,AP3S1,APRT,ARG1,ASS1,ATP2A1,ATP6AP1,ATP6V0A2,ATP6V0A4,ATP6V0B,ATP6V0C,ATP6V0D1,ATP6V1A,ATP6V1B2,ATP6V1F,BAIAP2,BCAR1,BMP7,BRAF,BSG,BTG2,CA2,CACYBP,CAD,CAMK2A,CAT,CCL2,CCL5,CCN2,CCND3,CDC5L,CDK2,CITED1,CREB1,CRHR1,CRY1,CSHL1,CSK,CTSB,CXCL12,CYC1,CYP11B2,CYP27B1,DENND4C,EEF2K,EGR1,EIF2B1,EIF2B2,EIF2B3,EIF2B4,EIF2B5,EIF…			GO: Biological Process	GO:0046903	secretion	10	ABAT,ABCB11,ABL1,ACE,ACHE,ACTN1,ACTN4,ACVR1C,ACVR2A,ADAM9,AGTR1,AHI1,ALB,ALOX12B,ALOX15B,ANG,ANGPT1,ANK1,ANXA3,AP1G1,APBA1,APRT,AQP1,AQP5,AQP8,ARFGEF1,ARHGAP44,ARHGEF7,ARL2,ARRB1,ASIC1,ATG5,ATP13A2,ATP2A2,ATP6AP1,AVPR1A,AVPR2,BAD,BAIAP3,BANK1,BCR,BGLAP,BMP6,BRAF,BTK,BTN3A1,BTN3A2,C12orf4,C1QTNF1,C5,CA9,CACNA1A,CACNA1B,CACNA1G,CACNA1H,CACNA1I,CAD,CADM1,CALM2,CALM3,CAMK2A,CANX,CBARP,CBLN1,CBLN4,CCK…			GO: Biological Process	GO:0009790	embryo development	10	ABCG2,ABI1,ACD,ACVR1,ACVR1B,ACVRL1,ADAM10,ADD1,ADIPOQ,AFF3,ALDH1A1,ALDH1A2,ALPI,ALX3,ALX4,AMOT,ANKRD11,APAF1,APBA1,APBA2,APBA3,APLP2,APOB,AR,ARFRP1,ARHGAP35,ARNT2,ASCL2,ATOH8,ATP5F1A,AXIN2,B9D1,BASP1,BCR,BIRC5,BIRC6,BMP2,BMP4,BMP7,BMPR1A,BRCA2,BRK1,BTF3,C5,CACNA1C,CASP8,CC2D2A,CCDC39,CCDC40,CCM2,CCNB2,CDH1,CDK11A,CDK5R1,CDX2,CDX4,CELF1,CELF4,CELSR1,CER1,CFL1,CHD8,CHRD,CHRNA10,CHST11,CITED1,CITED2…			GO: Biological Process
GO: Biological Process	GO:0007417	central nervous system development	10	ABAT,ABR,ACAN,ACAT1,ACTL6B,ACVR1B,ADAM22,ADGRA2,ADGRG1,ADORA2A,AFDN,AGT,AGTR2,AHI1,AK2,AK8,AKT1,ALDH1A2,ANG,APLP1,AQP1,ARRB2,ARSA,ARSB,ASCL1,ASPM,ATIC,ATN1,ATP2B1,ATP2B2,ATP5PF,ATP6V0D1,ATP7A,ATXN2,AVPR1A,AXIN1,B4GALT2,BAD,BAK1,BASP1,BAX,BBS1,BBS4,BBS7,BCL2,BCL2L11,BID,BIN1,BMP4,BOK,BPTF,BRCA2,BTBD3,C16orf45,CALM3,CASP2,CCDC14,CD27,CDC42,CDH22,CDK5,CDK5RAP1,CDK5RAP2,CDK5RAP3,CDON,CELSR1,CEND1,CER…			GO: Biological Process	GO:0008285	negative regulation of cell proliferation	10	ACE2,ACVRL1,ADAMTS1,ADARB1,ADGRB1,ADORA2B,AIMP2,ALDH1A2,ALOX15B,ANG,APOD,APOE,ASPH,ATOH8,ATP5F1A,ATP8A2,AXIN2,AZGP1,B4GALT7,BCHE,BCL11B,BCL2,BCL6,BDKRB2,BMP7,BNIPL,BRD7,BTG3,BTN1A1,CASK,CASP3,CAV2,CBLB,CCL2,CCL8,CCN6,CD109,CD274,CD276,CD33,CD37,CD44,CD9,CDC6,CDC73,CDH13,CDK6,CDKN1A,CDKN1B,CDKN2A,CDKN2B,CDKN2C,CEACAM1,CEND1,CER1,CERS2,CGREF1,CHD5,CHERP,CIB1,COL18A1,COMT,COPS8,CSF1R,CTBP1,CTBP2,CTH…			GO: Biological Process	GO:0030512	negative regulation of transforming growth factor beta receptor signaling pathway	5.29628	ADAM17,CAV1,CAV2,FBN1,FBN2,GLG1,HTRA1,MTMR4,ONECUT2,PDPK1,SIRT1,SMAD7,SNX25,STRAP,TGFB3,TGFBR2,TGFBR3			GO: Biological Process	GO:0005975	carbohydrate metabolic process	10	A4GNT,ABHD10,ACACB,ACADM,ADAMTSL1,ADCYAP1R1,ADIPOQ,ADNP,ADRA1B,ADRB3,AGL,AKR1A1,AKT1,ALDH5A1,ALDOA,ALDOC,ALG1,ALG2,ALG3,ALG6,ALG9,AMDHD2,ANGPTL8,APOD,ARPP19,ART1,ART4,ATP4B,B3GALNT1,B3GALT2,B3GALT5,B3GAT1,B3GAT2,B3GNT3,B3GNT5,B3GNT7,B4GALNT1,B4GALT6,B4GALT7,B4GAT1,BRS3,C1GALT1,C1GALT1C1,C1QTNF2,C1QTNF3,CA5A,CALM1,CALM2,CD244,CDS2,CHI3L1,CHI3L2,CHIA,CHIT1,CHST12,CHST13,CHST15,CHST5,CHST9,CLTC,CNOT…			GO: Biological Process	GO:1902533	positive regulation of intracellular signal transduction	5.80234	ABL1,ADAM8,ADGRG1,ADIPOQ,ADRA1A,ADRA1B,AKAP13,AKAP5,ALS2,ANGPT1,ANKRD6,APOL3,ARAF,ARL6IP5,ARPP19,ARRB1,ATP2C1,ATP6AP1,ATR,AVPI1,AXIN1,BANK1,BAX,BCL2L11,BCLAF1,BNIP2,BRAF,BRD4,BST2,BUB1,C1QBP,C1QTNF1,C5,C5AR2,CALM3,CALR,CANT1,CARD10,CARD11,CARD14,CARD9,CAT,CAVIN3,CC2D1A,CCDC22,CCL1,CCL11,CCL13,CCL16,CCL18,CCL19,CCL2,CCL20,CCL21,CCL22,CCL23,CCL24,CCL26,CCL3,CCL5,CCL8,CCN2,CCR1,CD27,CD28,CD3E,CD44,C…			GO: Biological Process	GO:0046394	carboxylic acid biosynthetic process	10	ABAT,ABCB11,ACACA,ACADL,ACADVL,ACOT8,ACSM1,ACSM3,ACSS1,ACSS2,ADI1,AGXT2,AKR1A1,AKR1D1,ALDH18A1,ALDH1A1,ALDH1A2,ALDH1A3,ALDH4A1,ALDH9A1,ALOX12B,ALOX15B,ALOX5,ALOX5AP,ALOXE3,AMACR,APOA5,ASL,ASPA,ATIC,ATP2B4,ATP5IF1,AVPR1A,BCAT1,CAD,CBS,CD74,CDO1,CEACAM1,CPS1,CTH,CYP27A1,CYP39A1,CYP46A1,DECR2,DEGS1,DHRS9,EIF2B1,EIF2B2,ELOVL1,ELOVL2,ELOVL3,ELOVL5,ELOVL6,ENOPH1,ERLIN1,ERLIN2,FADS1,FADS2,FADS6,FCER1A,F…			GO: Biological Process	GO:0046903	secretion	10	A1BG,AACS,ABAT,ABCA1,ABCA12,ABCC4,ACHE,ACSL3,ACTN2,ACTN4,ADGRL1,ADIPOQ,ADORA2B,ADORA3,AGR2,AGTR2,AGXT,AHSG,AKAP5,ALB,ALDOA,ANG,ANK1,ANO1,ANPEP,ANXA3,ANXA4,APBA1,APBB1,APLN,APLP2,APOA2,APOH,AQP8,AQP9,ARF1,ARFGAP3,ARFGEF1,ARFGEF2,ARHGEF7,ARL2,ARL2BP,ATG7,ATP13A2,ATP2A2,ATP6AP1,AVPR2,B4GALT1,BAIAP3,BCR,BDKRB2,BGLAP,BIRC5,BRPF3,BRSK1,BRSK2,BTK,BTN1A1,C12orf4,C1QTNF1,C1QTNF5,C2CD2L,C5,C5AR2,CACNA1A,CA…			GO: Biological Process
GO: Biological Process	GO:0006875	cellular metal ion homeostasis	10	ADCYAP1R1,AGT,AGTR2,AKAP6,ALAS2,ANXA7,APOE,ARF1,ASPH,ATG5,ATP13A1,ATP13A2,ATP1A2,ATP1B1,ATP1B2,ATP1B3,ATP2A1,ATP2A3,ATP2B1,ATP2B2,ATP2B3,ATP2C2,ATP4A,ATP7A,AVPR1A,AVPR1B,BAK1,BAX,BBC3,BCL2,BDKRB1,BDKRB2,BMP4,BMP6,C3AR1,C7,CACNA1C,CACNA1F,CACNA1I,CACNB3,CALCR,CALM3,CALR,CAMK2D,CAPN3,CASQ1,CASR,CAV3,CCDC22,CCL1,CCL13,CCL19,CCL21,CCL28,CCL3,CCL7,CCL8,CCR1,CCR10,CCR3,CCR6,CCR7,CCR9,CD19,CD36,CD4,CD40…			GO: Biological Process	GO:0044257	cellular protein catabolic process	5.99242	ACR,ADAMTS7,AGXT,AMFR,ANAPC10,ANAPC15,ANAPC2,ANAPC4,ANAPC5,ANAPC7,ANKZF1,APOB,APOE,ARNTL,ARRB2,ASB2,ATE1,ATP13A2,AURKA,BAG5,BBS7,BCAP31,BFAR,BNIP3,BUB1,BUB3,CACUL1,CASP8,CAV3,CBL,CBLC,CCDC22,CCNB1,CCNF,CD81,CDC16,CDC20,CDC23,CDC26,CDC27,CDK1,CDKN2A,CENPE,CENPF,CHMP4B,CHMP4C,CLOCK,CLPP,CLPX,COMMD1,COPS3,CPVL,CSNK1A1,CSNK2A1,CTNNB1,CTSA,CTSB,CTSK,CTSL,CTSO,CTSS,CTSW,CUL2,CUL3,CUL4B,CUL9,DACT1,DDB1,…			GO: Biological Process	GO:1903845	negative regulation of cellular response to transforming growth factor beta stimulus	5.29628	ADAM17,CAV1,CAV2,FBN1,FBN2,GLG1,HTRA1,MTMR4,ONECUT2,PDPK1,SIRT1,SMAD7,SNX25,STRAP,TGFB3,TGFBR2,TGFBR3			GO: Biological Process	GO:0070201	regulation of establishment of protein localization	10	AACS,ABAT,ACSL3,ACSM6,ADAM8,ADAM9,ADIPOQ,AGT,AGTR1,AKAP1,AKAP6,AKT1,ANXA1,APBB1,APOA2,APOD,APPL1,AR,ARF1,ARF6,ARL2,ARL2BP,ARRB1,ASPH,ATG7,ATP13A2,ATP5IF1,AXIN2,BAG4,BANK1,BAP1,BBC3,BCAP31,BCL2L1,BCL3,BLK,BMP4,BMP7,BRSK2,BTN1A1,C1QTNF3,CABP1,CACNA1C,CACNA1E,CACNA2D2,CADM1,CAMK4,CAMP,CARD8,CASP1,CASP8,CASR,CCDC22,CCL13,CCL19,CCL3,CCL5,CCN3,CCT2,CCT4,CCT6A,CCT7,CCT8,CD14,CD2,CD244,CD27,CD274,CD34,CD…			GO: Biological Process	GO:0023014	signal transduction by protein phosphorylation	5.72792	ABL1,ACE2,ACVR1B,ACVR2A,ADAM8,ADIPOQ,ADRA1A,ADRA1B,AKAP13,AKAP9,AKT1,AMBP,ANGPT1,ANKRD26,ANKRD6,ARAF,ARL6IP5,ARRB1,ASH1L,ATF3,ATP6AP1,AVPI1,AXIN1,BANK1,BMP3,BMP5,BMP6,BMP7,BMP8B,BMPR1B,BNIP2,BRAF,BRAP,C1QTNF1,C3orf33,C5,C5AR2,CALM3,CAMK2A,CAMK2B,CAMK2G,CARD9,CAV3,CAVIN3,CBS,CCL1,CCL11,CCL13,CCL16,CCL18,CCL19,CCL2,CCL20,CCL21,CCL22,CCL23,CCL24,CCL26,CCL3,CCL5,CCL8,CCM2,CCN2,CCR1,CD27,CD44,CD74,CD8…			GO: Biological Process	GO:0006886	intracellular protein transport	10	ABLIM3,ABRA,ACTL6A,ADAR,ADPRH,ADPRHL1,AFG3L2,AIP,AKAP12,AKAP6,AKT2,ANGPT1,ANK1,AP1G1,AP1M2,AP2A1,AP2A2,AP2B1,AP2M1,AP2S1,AP3B1,AP4B1,AP4S1,APBA1,APOD,ARCN1,ARFRP1,ARHGEF2,ARIH2,ARL6IP1,ATG4C,ATG4D,ATP13A2,ATP1B1,ATP2C2,ATP5IF1,AUP1,AXIN2,BAP1,BCAP29,BCAS3,BCL3,BECN1,BLZF1,BMP6,BMP7,C16orf70,CABP1,CALR,CAMK1,CCL2,CD36,CD74,CDC37,CDK1,CEACAM1,CEP57,CFL1,CHMP4A,CIB1,CLTA,CLTC,CLTCL1,COPA,COPB1,COPB2…			GO: Biological Process	GO:0006935	chemotaxis	10	ABCC1,ABLIM1,ACKR2,ACKR4,ADAM10,ADAM17,AKT2,ALCAM,AMOT,ANK3,APBB1,APBB2,ARHGEF5,ARX,BCAR1,BIN2,BMP4,BMP7,BMPR1B,BOC,C1QBP,C5,C5AR2,CALCA,CCL1,CCL11,CCL16,CCL18,CCL19,CCL2,CCL20,CCL21,CCL22,CCL23,CCL24,CCL25,CCL26,CCL27,CCL28,CCL3,CCL4,CCL5,CCL7,CCL8,CCR10,CCR4,CCR7,CCR9,CDH13,CDH4,CDK5,CDK5R1,CHGA,CHL1,CHN1,CMTM1,CMTM2,CMTM5,CMTM7,CNR2,CNTN2,CNTN4,CORO1A,CRMP1,CSF1,CX3CR1,CXCL1,CXCL12,CXCL16,CXCL…			GO: Biological Process
GO: Biological Process	GO:0044770	cell cycle phase transition	10	ACTR1A,ACVR1,ACVR1B,ADAM17,AKAP8,AKAP9,AKT1,ANAPC10,ANAPC15,ANAPC16,ANAPC2,ANAPC7,APEX1,BAX,BCL2,BID,BIRC5,BRD4,BRD7,BRSK2,BTRC,BUB1,BUB1B,BUB3,C10orf99,CACUL1,CALM3,CAMK2B,CAMK2D,CAMK2G,CARM1,CASP2,CCNA1,CCNB2,CCNB3,CCNE2,CCNG1,CDC16,CDC25B,CDC26,CDC27,CDC34,CDC6,CDC7,CDC73,CDK1,CDK10,CDK3,CDK5RAP2,CDK5RAP3,CDKN2A,CDKN2B,CDKN3,CDT1,CENPJ,CEP131,CEP192,CEP57,CEP63,CEP72,CETN2,CHMP2A,CHMP7,CKAP5,C…			GO: Biological Process	GO:0006629	lipid metabolic process	5.96002	A4GALT,ABCA4,ABCB11,ABCC1,ABCD1,ABCD2,ABCD3,ABHD12,ABHD2,ABHD3,ABHD5,ABHD6,ACAA1,ACACA,ACACB,ACAD10,ACADL,ACADM,ACAP1,ACAT2,ACBD3,ACER1,ACER3,ACHE,ACOT11,ACOT12,ACOT2,ACOT8,ACOX1,ACSBG2,ACSL1,ACSL3,ACSL5,ACSL6,ACSS1,ACSS2,ADGRF5,ADH4,ADH5,ADORA2B,AGPAT2,AGPAT3,AGPS,AJUBA,AKR1D1,ALDH1A1,ALDH1A2,ALDH3A2,ALG12,ALG13,ALG14,ALG2,ALKBH7,ALMS1,ALOX12,ALOX12B,ALOX15B,ALOX5AP,ALOXE3,AMACR,ANG,ANKRD23,ANXA…			GO: Biological Process	GO:0007596	blood coagulation	5.23149	ACTB,ACTG1,ACTN1,ADAMTS18,AK3,AP3B1,C1GALT1C1,CAPZA1,CAV1,CBX5,CD34,CD59,DOCK8,DOCK9,EHD1,F2,F9,FAP,FLNA,FZD6,GATA4,GNA14,HPS5,IL6,ITPR1,ITPR2,ITPR3,KDM1A,LBH,LMAN1,LNPK,LYST,MFN2,MYH9,PABPC4,PDPK1,PLCG2,PLSCR1,PRKCB,RAB27A,RAB5A,RBSN,S100A9,SERPINB2,TC2N,TENT5A,TLN1,VAV3,VCL,ZFPM2			GO: Biological Process	GO:0034097	response to cytokine	10	AANAT,ACKR2,ACP5,ACSL4,ADAM9,ADAR,ADIPOQ,AES,AFF3,AGPAT2,AKAP6,AKT1,ALAD,ALDH1A2,ALOX15,ANXA1,APOB,AQP4,ARG1,ARHGEF2,ASPN,ASS1,AVPR2,AXL,BAG4,BCL2L1,BGN,BIRC2,BYSL,C19orf66,CALCA,CAMK2A,CAMK2D,CASP3,CASP8,CCL1,CCL11,CCL13,CCL16,CCL17,CCL18,CCL19,CCL20,CCL21,CCL22,CCL23,CCL24,CCL25,CCL26,CCL3,CCL4,CCL5,CCL8,CCR10,CCR9,CD14,CD27,CD274,CD38,CD40,CD86,CDC34,CDC37,CDC5L,CHAD,CHI3L1,CHUK,CITED1,CLCF1,C…			GO: Biological Process	GO:0030198	extracellular matrix organization	5.65861	ABI3BP,ABL1,ADAM10,ADAM15,ADAM8,ADAMTS2,ADAMTSL2,ADAMTSL4,AMBN,ANTXR1,APLP1,APLP2,B4GALT7,BGN,BSG,CAPG,CAPNS1,CCDC80,CCN2,CD44,CD47,CMA1,COL10A1,COL11A1,COL16A1,COL18A1,COL1A2,COL27A1,COL4A2,COL4A6,COL5A1,COL5A2,COL6A2,COL6A3,COL9A3,CREB3L1,CST3,CTSG,CTSS,CTSV,DCN,DDR2,DNAJB6,ECM2,EGFL6,ELANE,ELF3,ELN,ETS1,F11R,FBLN1,FBLN5,FGB,FGFR4,FKBP1A,FLRT2,FMOD,FN1,FOXF1,FSHR,FURIN,GAS6,GFOD2,GPM6B,HAPLN1,H…			GO: Biological Process	GO:0001666	response to hypoxia	10	ABAT,ACAA2,ACOT2,ACTN4,AGTRAP,ALAS2,ALKBH5,ANG,ANGPT2,ANGPT4,APOLD1,AQP1,ARNT2,ASCL2,ATP1B1,BAD,BECN1,BIRC2,BMP7,CA9,CBFA2T3,CBS,CCL2,CCNA2,CD34,CD38,CDKN1B,CHRNA4,CHRNB2,CIAO3,COMMD1,CREBBP,CUL2,CXCL12,CYBB,CYGB,DDIT4,DNMT3A,DNMT3B,DRD1,DRD2,ECE1,EDNRA,EGLN2,EIF4EBP1,ELOB,ENDOG,ENG,ERCC2,ERO1A,FAM162A,FLT1,FOSL2,GNB1,GNGT1,GPR182,HIF1A,HIF1AN,HIF3A,HSD11B2,HSP90B1,HYOU1,ICAM1,IL1B,IRAK1,ITPR1,IT…			GO: Biological Process	GO:0042330	taxis	10	ABCC1,ABLIM1,ACKR2,ACKR4,ADAM10,ADAM17,AKT2,ALCAM,AMOT,ANK3,APBB1,APBB2,ARHGEF5,ARX,BCAR1,BIN2,BMP4,BMP7,BMPR1B,BOC,C1QBP,C5,C5AR2,CALCA,CCL1,CCL11,CCL16,CCL18,CCL19,CCL2,CCL20,CCL21,CCL22,CCL23,CCL24,CCL25,CCL26,CCL27,CCL28,CCL3,CCL4,CCL5,CCL7,CCL8,CCR10,CCR4,CCR7,CCR9,CDH13,CDH4,CDK5,CDK5R1,CHGA,CHL1,CHN1,CMTM1,CMTM2,CMTM5,CMTM7,CNR2,CNTN2,CNTN4,CORO1A,CRMP1,CSF1,CX3CR1,CXCL1,CXCL12,CXCL16,CXCL…			GO: Biological Process
GO: Biological Process	GO:1901653	cellular response to peptide	10	ADCY1,ADCY2,ADCY3,ADCY4,ADCY6,ADCY8,ADCY9,ADRM1,AGT,AGTR2,AGTRAP,AHCYL1,AHSG,AKAP1,AKT1,AKT2,AKT3,ALDOB,ANXA5,APEX1,APOBEC1,APPL1,ASS1,ATP6V0A4,ATP6V0B,ATP6V0C,ATP6V0D1,ATP6V0E1,ATP6V1C1,ATP6V1D,ATP6V1F,ATP6V1G3,BAIAP2L1,BCAR1,CA2,CDC6,CEACAM1,CISH,CPEB2,CPS1,CREB1,CRHBP,CRHR1,CRHR2,CSHL1,CTNNB1,CYP11B1,CYP11B2,DENND4C,EDN1,EEF2K,EIF4EBP1,ENPP1,ERRFI1,ESRRA,FBN1,FER,FOXO4,GCK,GH1,GHR,GHRHR,GHRL,G…			GO: Biological Process	GO:0051603	proteolysis involved in cellular protein catabolic process	5.88142	ACR,ADAMTS7,AGXT,AMFR,ANAPC10,ANAPC15,ANAPC2,ANAPC4,ANAPC5,ANAPC7,ANKZF1,ARNTL,ARRB2,ASB2,ATE1,AURKA,BAG5,BBS7,BCAP31,BFAR,BUB1,BUB3,CACUL1,CASP8,CAV3,CBL,CBLC,CCDC22,CCNB1,CCNF,CDC16,CDC20,CDC23,CDC26,CDC27,CDK1,CDKN2A,CENPE,CENPF,CHMP4B,CHMP4C,CLOCK,CLPP,CLPX,COMMD1,COPS3,CPVL,CSNK1A1,CSNK2A1,CTNNB1,CTSA,CTSB,CTSK,CTSL,CTSO,CTSS,CTSW,CUL2,CUL3,CUL4B,CUL9,DDB1,DDRGK1,DERL2,DERL3,DLGAP1,DNAAF4,DU…			Pathway	790012	Biosynthesis of amino acids	10	ACO2,ALDH18A1,ALDOA,ARG2,BCAT2,CPS1,ENO1,GAPDH,GOT2,IDH3A,MTR,OTC,PFKP,PGK1,RPIA,SDSL,SHMT1,SHMT2,TALDO1,TKT			GO: Biological Process	GO:0045321	leukocyte activation	10	ABR,ADAM8,ADAM9,ADK,ADORA2B,ADORA3,ADRM1,AKT1,ANXA1,ANXA3,AP3B1,APBB1IP,APC,ATP11C,AXL,AZU1,BAK1,BANK1,BATF,BATF2,BAX,BCL10,BCL11A,BCL11B,BCL2A1,BCL3,BLM,BLNK,BMP4,BRAF,BST1,BTN1A1,BTN3A1,CADM1,CAMK4,CASP1,CASP3,CASP8,CBLB,CCL13,CCL19,CCL21,CCL3,CCL5,CCR9,CD180,CD1C,CD2,CD200,CD226,CD244,CD27,CD274,CD28,CD37,CD38,CD3D,CD3E,CD3G,CD40,CD5,CD55,CD6,CD7,CD79A,CD79B,CD81,CD84,CD86,CD8A,CD8B,CD93,CDKN1…			GO: Biological Process	GO:0009141	nucleoside triphosphate metabolic process	5.65808	ADK,AK1,AK5,AK8,ALDOC,ATP1A2,ATP1B1,ATP5F1A,ATP5F1C,ATP5F1D,ATP5MC1,ATP5MC2,ATP5MF,ATP5MG,ATP5PB,ATP5PD,ATP5PF,ATP5PO,ATP6V0A2,ATP6V0A4,ATP6V1A,ATP6V1B2,BPGM,CAD,CMPK1,COX15,COX4I1,COX5A,COX5B,COX6B1,COX7A2L,COX7C,COX8A,CTNS,CYC1,DGUOK,DNAJC15,EIF6,ENO1,ENO3,ENPP3,ENTPD5,FBP1,FXN,GADD45GIP1,GALE,GALT,GCK,GPHN,GPI,HIF1A,HK1,HK2,HSPA8,INSR,KHK,LDHA,MIF,MLXIPL,MOCS1,MOCS2,MPI,MYH3,MYH7,MYH8,MYOG,NCO…			GO: Biological Process	GO:0032101	regulation of response to external stimulus	10	ABAT,ACE,ACE2,ACIN1,ACP5,ACTL6A,AGTR1,AKT2,ALKBH5,ALOX5AP,ALPK1,AMBRA1,ANGPT2,ANKRD17,AOC3,AP1G1,AP1M2,AP2A1,AP2A2,AP2B1,AP2M1,AP2S1,APOBEC3F,APOD,APOE,ASIC2,ATG5,ATP13A2,ATP1B1,ATP6V0A1,ATP6V0C,ATP6V0E1,ATP6V1A,ATP6V1B1,ATP6V1B2,ATP6V1C2,ATP6V1G1,AZU1,BBS4,BCR,BECN1,BIRC2,BIRC3,BMP6,BMPR2,BRAF,BTK,C1QBP,C1QTNF1,C3,C3AR1,C4BPB,C5,C6,C7,C8A,C8G,C9,CA7,CALCOCO2,CALM2,CALM3,CALR,CAMKMT,CAPNS1,CCDC36…			GO: Biological Process	GO:0099536	synaptic signaling	10	ABAT,ABHD6,ACHE,ADGRL1,ADIPOQ,ADRA1A,AKAP5,ANAPC2,ANXA9,APBA1,APBA2,APBA3,APOE,ARF1,ASIC2,ATAD1,ATP2A2,BAIAP2,BAIAP3,BCHE,BRSK1,CA7,CACNA1A,CACNA1C,CACNB1,CACNB2,CACNB3,CACNG7,CADPS,CADPS2,CAMK2A,CAMK2B,CASK,CAV2,CCKBR,CCL2,CDH8,CDK5,CDK5R1,CEL,CELF4,CELSR1,CHRM2,CHRM3,CHRNA1,CHRNA10,CHRNA2,CHRNA3,CHRNA4,CHRNA5,CHRNA6,CHRNA7,CHRNB1,CHRNB2,CHRNB3,CHRND,CHRNG,CLCN3,CLSTN2,CNIH2,CNP,CNR1,CNR2,CNTN2,…			GO: Biological Process
GO: Biological Process	GO:0051130	positive regulation of cellular component organization	10	ABCB4,ABR,ACD,ACHE,ACSL6,ACSM6,ACTN4,ACTR3B,ADAMTS1,ADD1,ADGRB1,ADGRB2,ADNP,AGT,AHI1,AHSG,AKAP8,AKT1,AKT2,ALX1,ANAPC2,ANK1,ANKFY1,AP1AR,APBB1,APOC2,APOE,APOPT1,AQP1,AR,ARAP1,ARF1,ARF6,ARFIP2,ARHGEF5,ARL2,ARPC1A,ARPC4,ARPC5,ARRB2,ARSB,ATG13,ATG5,ATP8A1,ATR,AZU1,BAD,BAIAP2L1,BAK1,BAMBI,BAP1,BAX,BBC3,BBS4,BCAS3,BCL11A,BCL2,BCL2L11,BECN1,BID,BIN1,BIRC5,BMP4,BMP7,BNIP3,BRAF,BRD7,BTC,C1QBP,CALCOCO2,CAL…			GO: Biological Process	GO:0032101	regulation of response to external stimulus	5.87527	A2M,ABAT,ACE,ACE2,ACIN1,ACP5,ACTL6A,ADAM10,ADAM8,ADORA2B,AHSG,ALKBH5,ALOX12,ALOX5AP,ANGPT2,ANKRD17,ANXA1,ANXA5,AOC3,AP1G1,AP1M1,AP1S1,AP2A1,AP2A2,AP2B1,APOD,APOE,ASB2,ASH1L,ASIC2,ATP13A2,ATP1B1,ATP6V0A2,ATP6V0C,ATP6V0D1,ATP6V0E1,ATP6V1B1,ATP6V1C1,ATP6V1E1,AZU1,BCL6,BCR,BMP6,BNIP3,BRAF,BRD4,C1QTNF1,C3,C5,C5orf30,C6,C7,C8A,C8B,C8G,CA7,CALCOCO2,CALCRL,CALM1,CALM2,CAMK1D,CAPNS1,CASK,CASP1,CASP3,CASP4…			Pathway	167325	Protein processing in endoplasmic reticulum	4.46117	ATF4,ATF6,ATXN3,CKAP4,DDIT3,DNAJB1,DNAJC3,EDEM2,EIF2AK2,HERPUD1,HSP90AB1,HSP90B1,HSPA8,HYOU1,LMAN1,MARCH6,NPLOC4,PDIA4,RRBP1,SEC24D,SEC31A,SEL1L,SKP1,SSR2,STT3A,UBE2D1,UBE2G2,UBE4B,XBP1			GO: Biological Process	GO:0071345	cellular response to cytokine stimulus	10	ACKR2,ADAR,ADIPOQ,AGPAT2,AKAP6,AKT1,ALAD,ALOX15,APOB,AQP4,ARG1,ARHGEF2,ASPN,ASS1,AXL,BAG4,BGN,BIRC2,BYSL,CALCA,CAMK2A,CAMK2D,CASP8,CCL1,CCL11,CCL13,CCL16,CCL17,CCL18,CCL19,CCL20,CCL21,CCL22,CCL23,CCL24,CCL25,CCL26,CCL3,CCL4,CCL5,CCL8,CCR10,CCR9,CD27,CD40,CD86,CDC34,CDC37,CDC5L,CHAD,CHI3L1,CHUK,CLCF1,CLDN18,CLIP3,CNTF,COL1A1,COMMD7,CORO1A,CRHBP,CSF1,CSF1R,CSF2RB,CSF3,CXCL1,CXCL10,CXCL11,CXCL13,CXC…			GO: Biological Process	GO:0043436	oxoacid metabolic process	5.65553	AARS,ABCB11,ABCC1,ABCD1,ABCD2,ABHD12,ACAA1,ACAA2,ACACA,ACACB,ACAD11,ACADL,ACADS,ACADVL,ACO1,ACOT7,ACSBG2,ACSL1,ACSL3,ACSL6,ACSM1,ACSM2B,ACSM3,ACSS2,ADH7,ADI1,ADIPOQ,ADSSL1,AGMAT,AGXT,AHCY,AHCYL1,AIMP1,AKR1D1,AKT1,ALDH18A1,ALDH1A2,ALDH1L1,ALDOC,ALKBH7,ALOX15B,ALOX5,ALOX5AP,ALOXE3,AMACR,ANGPT1,ANKRD26,ANXA1,APOA2,APOA5,APOC2,ARG1,ARSB,ART4,ASL,ASNS,ASPG,ASS1,ATF4,ATG7,ATIC,AZIN2,B3GAT1,B3GNT3,B4GAL…			GO: Biological Process	GO:0019752	carboxylic acid metabolic process	10	AADAT,AARS,AASS,ABAT,ABCB11,ABCC1,ABCD1,ABCD2,ABHD12,ACAA2,ACACA,ACAD10,ACADL,ACADS,ACADVL,ACAT1,ACO1,ACO2,ACOT11,ACOT2,ACOT8,ACSBG2,ACSL1,ACSL5,ACSM1,ACSM2B,ACSM3,ACSS1,ACSS2,ACY1,ADHFE1,ADI1,ADIPOR2,ADPGK,ADSSL1,AGMAT,AGXT2,AHCYL2,AKR1A1,AKR1D1,AKT2,ALDH18A1,ALDH1A1,ALDH1A2,ALDH1A3,ALDH4A1,ALDH9A1,ALDOC,ALOX12B,ALOX15B,ALOX5,ALOX5AP,ALOXE3,AMACR,AMDHD1,AMDHD2,APOA5,ART4,ARV1,AS3MT,ASL,ASPA,ATIC…			GO: Biological Process	GO:0032101	regulation of response to external stimulus	10	ABAT,ACIN1,ACP5,ACTL6A,ADAM10,ADAM17,ADAMTS18,ADIPOQ,ADORA2B,ADORA3,AHSG,AKT2,ALKBH5,ALOX12,AP1M1,AP1S1,AP1S2,AP2A1,AP2M1,AP2S1,APCS,APOD,APOE,APOH,ARF1,ASH1L,ASIC2,ATG7,ATP13A2,ATP6V0A1,ATP6V0B,ATP6V0C,ATP6V0D1,ATP6V0E1,ATP6V1B2,ATP6V1C1,ATP6V1C2,ATP6V1E1,ATP6V1H,BCR,BRD4,BTK,C1QBP,C1QTNF1,C4BPB,C5,C5AR2,C7,C8A,C8B,C8G,CA7,CALM3,CAMKMT,CAPN3,CAPNS1,CASK,CCDC36,CCK,CCL1,CCL11,CCL16,CCL18,CCL19,CC…			GO: Biological Process
GO: Biological Process	GO:0042493	response to drug	10	AACS,ABAT,ABCA1,ABCA3,ABCB4,ABCC1,ABCC2,ABCC8,ABCD3,ABCG5,ACSL1,ACTC1,ADAM17,ADCY1,ADCYAP1R1,ADIRF,ADSSL1,AGPAT2,ALAD,ALDH1A1,ALDOB,AMH,APEX1,APOA2,APOBEC1,AQP1,ASS1,ATG5,ATP4A,ATR,BAD,BAK1,BAX,BCAR3,BCHE,BCL2,BDKRB2,BECN1,BLMH,BRAF,CALR,CASP1,CCL4,CDH3,CDK1,CDKN2A,CERS1,COL18A1,COL1A1,COQ7,CPS1,CREB1,CRHBP,CROT,CTNNB1,CYBB,CYP17A1,CYP1A1,CYP2C19,CYP2C8,CYP2C9,DAB1,DDC,DGCR2,DHODH,DNMT1,DNMT3B,DP…			GO: Biological Process	GO:0070838	divalent metal ion transport	5.82892	ABL1,ACE,ADCYAP1R1,AHNAK,ANXA5,AP3B1,AQP2,ARRB2,ASPH,ATP1B1,ATP2A1,ATP2A3,ATP2B2,ATP2B3,ATP2B4,ATP2C2,BCL2,CACNA1A,CACNA1D,CACNA1F,CACNA1H,CACNA1I,CACNA1S,CACNA2D1,CACNA2D4,CACNB1,CACNB3,CACNG1,CACNG2,CACNG3,CACNG4,CACNG7,CALCRL,CALM1,CALM2,CAMK2A,CASK,CASQ2,CATSPER3,CAV3,CBARP,CCL19,CCL2,CCL3,CCL4,CCL8,CCN2,CD19,CD4,CD84,CDK5,CHERP,CHRNA7,CLCA1,CLDN16,CLEC4C,CNNM2,CRH,CRHR1,CSN2,CTNNB1,CXCL10,CX…			Pathway	814926	Carbon metabolism	4.18608	ACO2,ALDOA,CPS1,ECHS1,ENO1,GAPDH,GLUD1,GOT2,HADHA,HK2,IDH3A,OGDH,PDHA1,PFKP,PGK1,RPIA,SDSL,SHMT1,SHMT2,SUCLG2,TALDO1,TKT			GO: Biological Process	GO:0002220	innate immune response activating cell surface receptor signaling pathway	10	BCL10,BTRC,CHUK,CLEC4E,CUL1,FCER1G,FCN1,ICAM2,IKBKG,KLRK1,KRAS,LYN,MALT1,MAP3K7,NFKBIA,PAK1,PAK2,PAK3,PLCG2,PRKACA,PRKCD,PSMA1,PSMA2,PSMA3,PSMA4,PSMA5,PSMA6,PSMA7,PSMB1,PSMB10,PSMB2,PSMB3,PSMB4,PSMB5,PSMB6,PSMB7,PSMC2,PSMC3,PSMC4,PSMC5,PSMC6,PSMD10,PSMD11,PSMD12,PSMD13,PSMD14,PSMD2,PSMD3,PSMD6,PSMD7,PSMD8,PSMD9,PSME1,PSME4,PSMF1,RAF1,RELB,SKP1,SRC,SYK,TAB1,TAB2,TLR2,UBA52,UBB,UBC,UBE2D1,UBE2V1			GO: Biological Process	GO:0043062	extracellular structure organization	5.56766	ABI3BP,ABL1,ADAM10,ADAM15,ADAM8,ADAMTS2,ADAMTSL2,ADAMTSL4,AMBN,ANTXR1,APLP1,APLP2,B4GALT7,BGN,BSG,CAPG,CAPNS1,CCDC80,CCN2,CD44,CD47,CMA1,COL10A1,COL11A1,COL16A1,COL18A1,COL1A2,COL27A1,COL4A2,COL4A6,COL5A1,COL5A2,COL6A2,COL6A3,COL9A3,CREB3L1,CST3,CTSG,CTSS,CTSV,DCN,DDR2,DNAJB6,ECM2,EGFL6,ELANE,ELF3,ELN,ETS1,F11R,FBLN1,FBLN5,FGB,FGFR4,FKBP1A,FLRT2,FMOD,FN1,FOXF1,FSHR,FURIN,GAS6,GFOD2,GPM6B,HAPLN1,H…			GO: Biological Process	GO:1901701	cellular response to oxygen-containing compound	10	AANAT,ABL1,ACACA,ADAM9,ADAMTS1,ADCY1,ADCY4,ADCY6,AGTR1,AGTRAP,AICDA,AIFM1,AKAP6,AKAP8,AKAP9,AKT2,ALDH1A2,AOC1,APEX1,APLP1,APRT,AQP1,AQP4,AQP8,ARHGEF2,ARRB1,ATP2B4,ATP6AP1,ATP6V0A1,ATP6V0C,ATP6V0E1,ATP6V1A,ATP6V1B1,ATP6V1B2,ATP6V1C2,ATP6V1F,ATP6V1G1,ATP6V1G3,AVPR1A,BAD,BAIAP2L1,BAIAP2L2,BGLAP,BMP6,BMP7,BRINP2,BTK,CAMK2A,CASP9,CCL2,CCL20,CCNA2,CCS,CD14,CD36,CD40,CD6,CD84,CD86,CDK1,CDK16,CDK19,CDK2,…			GO: Biological Process	GO:1901137	carbohydrate derivative biosynthetic process	10	ABCA1,ABCA7,ACACA,ACAN,ACOT7,ACOT8,ACR,ADAMTS13,ADAMTS7,ADAMTSL1,ADAMTSL4,ADCY1,ADCY10,ADCY8,ADCY9,ADCYAP1R1,ADGRD1,ADK,ADORA2B,ADRB3,ADSS,ADSSL1,AK1,AK2,AK3,AK4,AK9,AKAP5,AKAP6,AKR1A1,ALDOA,ALG1,ALG10,ALG12,ALG14,ALG3,ALG9,AMDHD2,AMPD1,AMPD3,AP2A1,APLP1,APOE,ARF4,ARFGEF1,ART1,ART3,ART4,ART5,ATP4B,ATP5F1A,ATP5F1B,ATP5F1D,ATP5MG,ATP5PO,ATP6V0A1,ATP6V0A4,AVPR2,B3GALNT2,B3GALT2,B3GALT5,B3GAT1,B3GNT4…			GO: Biological Process
GO: Biological Process	GO:0036293	response to decreased oxygen levels	10	ABAT,ACAA2,ACTN4,ADAM17,AGTRAP,AIFM1,AKT1,ALAD,ALAS2,ALKBH5,ANG,ANGPT2,ANGPT4,APOLD1,AQP1,ATP1B1,BAD,BBC3,BCL2,BDKRB2,BECN1,BMP7,BNIP3,CAMK2D,CAMK2G,CASP1,CHCHD2,CHRNA7,CHRNB2,CIAO3,CPEB2,CPEB4,CREB1,CREBBP,CRHR1,CRYAA,CRYAB,CUL2,CXCL12,CYBB,CYGB,CYP1A1,DNMT3B,DPP4,DRD2,E2F1,ECE1,EDN1,EDNRA,EEF2K,EGLN3,EIF4EBP1,ENG,EPAS1,EPO,ERO1A,FAM162A,FLT1,FMN2,FOSL2,GATA6,GNGT1,GPR182,HIF1AN,HIF3A,HIGD1A,HMO…			GO: Biological Process	GO:0031401	positive regulation of protein modification process	5.82033	ABCA7,ABL1,ACE,ACSL1,ACVR1B,ACVR2A,ACVRL1,ADAM8,ADAM9,ADCY2,ADCY3,ADCY8,ADCY9,ADNP,ADORA2B,ADRA1B,ADRB3,AIMP2,AJUBA,AKAP8,AKAP8L,ALK,ALOX12B,ALS2,ANAPC10,ANAPC15,ANAPC2,ANAPC4,ANAPC5,ANAPC7,ANG,ANGPT1,ANGPT4,ANKRD6,ARFGEF1,ARHGEF2,ARHGEF5,ARL6IP5,ARRB2,ATG14,ATP2B4,ATP6AP1,AUTS2,AVPR2,AXIN2,AZU1,BAG4,BANK1,BCAR3,BCL2,BCL6,BIRC7,BMI1,BMP1,BMP15,BMP6,BMP7,BRAF,BRAT1,BRD7,BRMS1,BUB3,C1QTNF1,C3,C5,C6…										GO: Biological Process	GO:0048870	cell motility	10	AAMP,ABCC1,ABI3,ABR,ACE,ACP5,ACVR1,ACVR1B,ADAM15,ADAM8,ADAM9,ADGRG1,ADGRL3,ADIPOQ,ADORA1,ADORA3,AGT,AGTR1,AKAP4,AKT1,ALOX12,AMOT,ANGPT2,ANGPT4,ANKS1A,ANXA1,ANXA3,AP1AR,APBB1,APBB2,APC,APOB,APOD,AQP1,ARAP3,ARHGAP24,ARHGAP5,ARID5B,ARPC5,ARSB,ASCL1,ASPM,ATP1B2,ATP1B3,ATP2B4,ATP5F1B,ATP8A1,AXL,AZU1,BAG4,BAX,BDKRB1,BIN2,BMP4,BMPR2,BRAF,BRK1,BSG,BTG1,BVES,C1QBP,C5orf30,CACNA1E,CALCA,CALR,CAMK1D,CAMK2D,…			GO: Biological Process	GO:0007005	mitochondrion organization	5.49765	ACAA2,ACIN1,AFG3L2,AGTPBP1,AKT1,AKT3,ALAS1,ALKBH7,AMBRA1,ANXA5,APOO,ASB2,ATG12,ATG13,ATG4A,ATG4C,ATG5,ATG7,ATP13A2,ATP1B1,ATP2A1,ATPAF1,BAX,BCL2A1,BCL2L11,BCS1L,BLOC1S2,BNIP3,BNIP3L,BOC,C1QBP,C5,CA7,CAMK2A,CAMKMT,CD93,CDC37,CDK5RAP1,CHAF1B,CHCHD1,CHCHD5,CHST3,CIDEB,CLN8,CLUH,CLVS1,COA3,COA4,COL4A3BP,COX14,COX18,COX7A2L,COX8A,CRYAA,CTTN,DARS2,DCN,DDHD2,DKKL1,DNAJC19,DYNLL1,DYNLL2,DZANK1,EPAS1,FAM1…			GO: Biological Process	GO:0080135	regulation of cellular response to stress	10	AAAS,ABL1,ACTL6A,AKT1S1,AMBRA1,ANKRD6,APEX1,ARHGEF2,ATG5,ATP13A2,ATP6V0A1,ATP6V0C,ATP6V0E1,ATP6V1A,ATP6V1B1,ATP6V1B2,ATP6V1C2,ATP6V1G1,AXIN2,BABAM2,BAG3,BAG5,BECN1,BIRC7,BMP7,BRAF,CALCOCO2,CAMK2A,CAMK2B,CAPNS1,CASP9,CAV3,CBS,CCR7,CD34,CD36,CD74,CDC42SE1,CDK6,CEACAM1,CHEK1,CHMP4A,CLEC16A,CLN3,CNTF,COMMD1,CREB3,CREB3L1,CREBBP,CSNK2A2,CTSK,CTTN,CUL4A,CXCL12,DAB2,DACT1,DBNL,DERL2,DERL3,DNAJA1,DNAJB6,…			GO: Biological Process	GO:0071495	cellular response to endogenous stimulus	10	AACS,ABCG2,ACACA,ACAP2,ACTN2,ACVR1,ACVRL1,ADAM17,ADAMTS1,ADAMTS7,ADCY1,ADCY8,ADCY9,ADIPOQ,ADIPOR2,ADRM1,AGTR2,AGTRAP,AHSG,AIFM1,AKAP5,AKAP6,AKAP8,AKR1C2,AKT2,AKT3,ALDOB,ALPP,AMHR2,AOC1,AP3S1,APAF1,APLP1,APOB,APOBEC1,AQP8,AQP9,AR,ARG1,ARHGEF18,ASPN,ASS1,ATP6AP1,ATP6V0A1,ATP6V0A4,ATP6V0B,ATP6V0C,ATP6V0D1,ATP6V0E1,ATP6V1B2,ATP6V1C1,ATP6V1C2,ATP6V1E1,ATP6V1F,ATP6V1H,AVPR1B,AVPR2,BAIAP2,BAIAP2L1,BCAR1…			GO: Biological Process
GO: Biological Process	GO:0010959	regulation of metal ion transport	10	ABCC8,ACE,ACTN4,ADCYAP1R1,ADORA2A,AGT,AHCYL1,AKAP6,AKAP9,AKT1,AKT2,AKT3,ARF1,ARRB2,ASPH,ATG5,ATP1A2,ATP1B1,ATP1B2,ATP1B3,ATP2B2,ATP2C2,BAK1,BAX,BCL2,BDKRB1,BMP4,CAB39,CACNA1B,CACNA1C,CACNA1D,CACNA2D4,CACNB1,CACNB3,CALM3,CAMK2B,CAMK2D,CAMK2G,CAPN3,CASQ1,CASR,CAV3,CCL3,CCL4,CCR1,CD19,CD4,CD84,CHD7,CHP1,CLDN16,CLIC2,CNTN1,CREB3,CRHR1,CRHR2,CTNNB1,CXCL12,DBI,DIAPH1,DLG1,DMD,DMPK,DNM2,DRD2,DRD4,EDN3,E…			GO: Biological Process	GO:0031329	regulation of cellular catabolic process	5.806	ABCD2,ABHD5,ABL1,ACACB,ACSL5,ACTL6A,ADAM8,ADAM9,ADRA1B,AIFM1,ANAPC10,ANAPC15,ANAPC2,ANAPC4,ANAPC5,ANAPC7,APAF1,APOA5,APOC2,APOE,ATG14,ATP13A2,ATP2B4,ATP6V0A2,ATP6V0C,ATP6V0D1,ATP6V0E1,ATP6V1B1,ATP6V1C1,ATP6V1E1,AURKA,BAG5,BBS7,BCAP31,BCL2,BNIP3,BPGM,BUB1,BUB3,CALCOCO2,CAPNS1,CASP1,CASP3,CAV3,CCDC22,CCNB1,CD81,CDC16,CDC20,CDC23,CDC26,CDC27,CDK1,CDK5,CDKN2A,CENPE,CENPF,CHMP4B,CNOT1,CNR1,COMMD1,CPT1…			Cluster [-0.232:0.046]							GO: Biological Process	GO:0045088	regulation of innate immune response	10	ADAM8,ADAR,ARF6,BCL10,BIRC2,BTRC,C1QBP,CADM1,CASP8,CCL5,CD14,CD180,CD226,CD86,CD96,CDC37,CHUK,CLEC4E,CNPY3,COCH,COLEC12,CR1,CTSB,CTSL,CUL1,CYBA,CYLD,DAB2IP,DDX60,DRD2,ERAP1,FADD,FCER1G,FCN1,FGR,GFER,GFI1,HAVCR2,HLA-A,HLA-B,HMGB1,HMGB2,HSP90AB1,HSP90B1,HSPD1,ICAM2,IFNAR1,IFNAR2,IFNG,IFNGR1,IFNGR2,IGF2,IKBKE,IKBKG,IL12A,IL12B,IRAK2,IRAK3,IRAK4,IRF3,IRF4,IRF7,ITCH,ITGAM,ITGB2,JAK1,KLRB1,KLRK1,KRAS,L…			GO: Biological Process	GO:0060548	negative regulation of cell death	5.47867	AARS,ABCB1,ABCC1,ABL1,ABRAXAS2,ACAA2,ADAM8,ADORA2A,AGO4,AHI1,AKT1,ALKBH1,ALMS1,AMBRA1,ANGPT1,ANGPT4,ANGPTL4,ANXA1,ANXA5,API5,ARAF,ARF4,ARHGEF1,ARRB1,ASIC2,ASNS,ATAD3A,ATF4,ATF5,ATG5,ATG7,ATP13A2,BAG5,BAX,BCL11B,BCL2A1,BCL2L2,BIRC6,BLK,BMP5,BMP7,BNIP1,BNIP2,BNIP3,BNIP3L,BRAF,BTG2,CABIN1,CACYBP,CARD14,CASP2,CAT,CBS,CBX4,CCL19,CCL2,CCL21,CCL5,CCN2,CCN3,CCN4,CCN6,CD27,CD38,CD44,CD59,CD74,CDK1,CDK11A,…			GO: Biological Process	GO:0071495	cellular response to endogenous stimulus	10	AANAT,ABL1,ACACA,ACSL1,ACVR1C,ACVR2A,ADAM9,ADAMTS1,ADAMTSL2,ADCY1,ADCY4,ADCY6,ADIPOR2,AGTR1,AGTRAP,AIFM1,AKAP13,AKAP6,AKAP8,AKAP9,AKT2,AOC1,APEX1,APLP1,APRT,AQP1,AQP8,ARHGEF2,ARRB2,ATP1A1,ATP2B4,ATP6AP1,ATP6V0A1,ATP6V0C,ATP6V0E1,ATP6V1A,ATP6V1B1,ATP6V1B2,ATP6V1C2,ATP6V1F,ATP6V1G1,ATP6V1G3,AVPR1A,AVPR1B,AVPR2,BAD,BAIAP2L1,BAIAP2L2,BBS4,BCAS3,BCL9,BECN1,BGLAP,BMP3,BMP5,BMP6,BMP7,BMP8B,BMPR1B,BMPR2,…			GO: Biological Process	GO:0032940	secretion by cell	10	A1BG,AACS,ABAT,ABCA1,ABCA12,ABCC4,ACHE,ACTN2,ACTN4,ADGRL1,ADIPOQ,ADORA2B,ADORA3,AGTR2,AHSG,AKAP5,ALB,ALDOA,ANG,ANK1,ANO1,ANXA3,ANXA4,APBA1,APBB1,APLN,APLP2,APOA2,APOH,ARF1,ARFGAP3,ARFGEF1,ARFGEF2,ARHGEF7,ARL2,ARL2BP,ATG7,ATP13A2,ATP2A2,ATP6AP1,B4GALT1,BAIAP3,BCR,BGLAP,BIRC5,BRPF3,BRSK1,BRSK2,BTK,BTN1A1,C12orf4,C1QTNF1,C1QTNF5,C2CD2L,C5,C5AR2,CACNA1A,CACNA1C,CACNA1H,CACNA1I,CADM1,CADPS,CADPS2,CALM…			GO: Biological Process
GO: Biological Process	GO:0000278	mitotic cell cycle	10	AAAS,AATF,ACTR1A,ACVR1,ACVR1B,ADAM17,AKAP8,AKAP9,AKT1,ANAPC10,ANAPC15,ANAPC16,ANAPC2,ANAPC7,ANKLE2,APEX1,ASCL1,ASPM,BABAM1,BABAM2,BANF1,BAX,BBS4,BCL2,BCL2L1,BECN1,BID,BIN3,BIRC5,BMP4,BMP7,BRCA2,BRD4,BRD7,BRSK2,BTC,BTRC,BUB1,BUB1B,BUB3,CACUL1,CALM3,CAMK2B,CAMK2D,CAMK2G,CARM1,CASP2,CCNA1,CCNB2,CCNB3,CCNE2,CCNG1,CDC123,CDC16,CDC25B,CDC26,CDC27,CDC34,CDC42,CDC6,CDC7,CDC73,CDCA8,CDK1,CDK10,CDK3,CDK5RA…			GO: Biological Process	GO:0072511	divalent inorganic cation transport	5.75424	ABL1,ACE,ADCYAP1R1,AHNAK,ANXA5,AP3B1,AQP2,ARRB2,ASPH,ATP1B1,ATP2A1,ATP2A3,ATP2B2,ATP2B3,ATP2B4,ATP2C2,BCL2,CACNA1A,CACNA1D,CACNA1F,CACNA1H,CACNA1I,CACNA1S,CACNA2D1,CACNA2D4,CACNB1,CACNB3,CACNG1,CACNG2,CACNG3,CACNG4,CACNG7,CALCRL,CALM1,CALM2,CAMK2A,CASK,CASQ2,CATSPER3,CAV3,CBARP,CBLIF,CCL19,CCL2,CCL3,CCL4,CCL8,CCN2,CD19,CD4,CD84,CDK5,CHERP,CHRNA7,CLCA1,CLDN16,CLEC4C,CNNM2,CRH,CRHR1,CSN2,CTNNB1,CXC…			Category	ID	Title (or Source)	Cluster logP	Cluster GeneSet			GO: Biological Process	GO:0045937	positive regulation of phosphate metabolic process	10	ABCA1,ABCA7,ACE,ACR,ACSL3,ACVR1,ACVR1B,ACVR2A,ADAM8,ADAM9,ADCY4,ADCY7,ADCY8,ADCYAP1R1,ADIPOQ,ADNP,ADORA1,ADORA2B,ADRA1B,ADRB3,AGAP2,AGT,AGTR1,AKAP6,AKAP9,AKT1,ALK,ALOX15,ALS2,ANGPT4,ANKRD6,APLN,APOC2,AR,ARHGEF2,ARL2BP,ARL6IP5,ARRB1,ATG14,ATP2B4,ATP6AP1,ATRAID,AVPR2,AXIN2,AZU1,BAG4,BAK1,BANK1,BAX,BCAR3,BCL10,BDNF,BMP1,BMP3,BMP4,BMP7,BMP8B,BMPR2,BNIP2,BRAF,BTBD10,C1QTNF2,C1QTNF3,CALCA,CALCR,CALCRL,…			GO: Biological Process	GO:0006082	organic acid metabolic process	5.47251	AARS,ABCB11,ABCC1,ABCD1,ABCD2,ABHD12,ACAA1,ACAA2,ACACA,ACACB,ACAD11,ACADL,ACADS,ACADVL,ACO1,ACOT7,ACSBG2,ACSL1,ACSL3,ACSL6,ACSM1,ACSM2B,ACSM3,ACSS2,ADH7,ADI1,ADIPOQ,ADSSL1,AGMAT,AGXT,AHCY,AHCYL1,AIMP1,AKR1D1,AKT1,ALDH18A1,ALDH1A2,ALDH1L1,ALDOC,ALKBH7,ALOX15B,ALOX5,ALOX5AP,ALOXE3,AMACR,ANGPT1,ANKRD26,ANXA1,APOA2,APOA5,APOC2,ARG1,ARSB,ART4,ASL,ASNS,ASPG,ASS1,ATF4,ATG7,ATIC,AZIN2,B3GAT1,B3GNT3,B4GAL…			GO: Biological Process	GO:0032940	secretion by cell	10	ABAT,ABL1,ACHE,ACTN1,ACTN4,ACVR1C,ACVR2A,ADAM9,AGTR1,AHI1,ALB,ALOX15B,ANG,ANGPT1,ANK1,ANXA3,AP1G1,APBA1,AQP1,ARFGEF1,ARHGAP44,ARHGEF7,ARL2,ARRB1,ASIC1,ATG5,ATP13A2,ATP2A2,ATP6AP1,AVPR1A,BAD,BAIAP3,BANK1,BCR,BGLAP,BMP6,BRAF,BTK,BTN3A1,BTN3A2,C12orf4,C1QTNF1,C5,CACNA1A,CACNA1B,CACNA1G,CACNA1H,CACNA1I,CADM1,CALM2,CALM3,CAMK2A,CANX,CBARP,CBLN1,CBLN4,CCK,CCKBR,CCL8,CCR1,CCR7,CD14,CD2,CD274,CD276,CD34,…			GO: Biological Process	GO:0034765	regulation of ion transmembrane transport	10	ACSL6,ACTN2,ACTN4,AHNAK,AKAP6,AKT2,ANK3,ANO1,ARF1,ASIC2,ASPH,ATP1B2,ATP2C2,BDKRB1,BMP4,BPIFA1,CACNA1A,CACNA1C,CACNA1F,CACNA1H,CACNA1I,CACNA1S,CACNA2D1,CACNB1,CACNB2,CACNB3,CACNG7,CALM3,CAMK2D,CAPN3,CASK,CASQ1,CASQ2,CATSPER3,CBARP,CCL2,CCL3,CD19,CEMIP,CFTR,CHP1,CHRNA4,CLCN1,CLCN3,CLCN4,CLCN6,CLCN7,CLCNKA,CLCNKB,CLEC4C,CLIC2,CLIC6,CNIH2,COMMD1,CORO1A,CRHR1,CRHR2,CXCL12,CXCL9,CXCR3,CYBA,CYBB,DHRS7C,…			GO: Biological Process
GO: Biological Process	GO:0033044	regulation of chromosome organization	10	ACD,AICDA,AKAP8,ANAPC10,ANAPC15,APOBEC1,ATAD2,ATG5,ATR,BECN1,BRD7,BUB1,BUB1B,BUB3,CAMK2D,CCT2,CCT3,CCT4,CCT6A,CCT7,CCT8,CDC26,CDC27,CDC6,CEP192,CHTOP,CSNK2A1,CSNK2A2,CTBP1,CTCF,CTNNB1,CUL3,DHX36,DKC1,DLGAP5,DNMT1,DNMT3B,DUSP1,DYNC1LI1,EED,ERCC1,ERCC4,ESPL1,GATA2,GFI1B,HNRNPC,ISL1,KAT2B,KDM1A,KDM3A,KDM4B,KDM4D,KMT2A,KMT2B,LCMT1,MAD1L1,MAD2L1BP,MAD2L2,MAP1S,MAP2K7,MAPK1,MAPK3,MAPKAPK5,MCRS1,MECP2,M…			GO: Biological Process	GO:0010562	positive regulation of phosphorus metabolic process	5.73609	ABCA7,ABL1,ACE,ACR,ACSL1,ACSL3,ACVR1B,ACVR2A,ACVRL1,ADAM8,ADAM9,ADCY2,ADCY3,ADCY8,ADCY9,ADCYAP1R1,ADGRD1,ADGRF5,ADNP,ADORA2B,ADRA1B,ADRB3,AJUBA,ALK,ALOX12B,ALS2,ANG,ANGPT1,ANGPT4,ANKRD6,APOC2,APOE,ARHGEF2,ARHGEF5,ARL6IP5,ARRB2,ATG14,ATP2B4,ATP6AP1,AVPR2,AXIN2,AZU1,BAG4,BANK1,BCAR3,BCL2,BIRC7,BMP1,BMP15,BMP6,BMP7,BRAF,BRAT1,BTBD10,C1QTNF1,C3,C5,CAB39,CACUL1,CALCR,CALCRL,CALM1,CALM2,CAMK1,CAP1,CAP2…			GO: Biological Process	GO:0098771	inorganic ion homeostasis	10	ABCB6,ABCB7,ABCC2,ADM,ADORA2A,ADRA1A,ADRA1B,ADRA1D,AGT,AGTR1,AGTR2,AKAP5,ANK1,ANK3,ANPEP,ANXA7,APOE,APP,ARF1,ASPH,ATG5,ATP1A2,ATP1B1,ATP1B2,ATP2A1,ATP2A2,ATP2A3,ATP2B1,ATP2B2,ATP2B3,ATP2C2,ATP4B,ATP5F1B,ATP6V0A4,ATP6V0D1,ATP6V0D2,ATP6V0E1,ATP6V1F,ATP6V1H,AVPR2,BCAP31,BDH2,BDKRB1,BDKRB2,C1QTNF1,C3AR1,C7,CA14,CA4,CA7,CACNA1A,CACNA1F,CACNA1G,CACNA1I,CACNA2D1,CACNB3,CALB1,CALCR,CALM1,CALM3,CALR,CAPN3…			GO: Biological Process	GO:0009259	ribonucleotide metabolic process	10	ABCA1,ABHD14B,ACACA,ACACB,ACR,ADCY4,ADCY7,ADCY8,ADCYAP1R1,ADK,ADNP,ADORA2B,ADRB3,ADSS,AIPL1,AK1,AKAP6,ALDOA,ALDOC,AMPD2,AMPD3,APLP1,APRT,AQP1,ATIC,ATP5F1A,ATP5F1B,ATP5F1C,ATP5F1D,ATP5IF1,ATP5MC1,ATP5MC2,ATP5MC3,ATP5MF,ATP5MG,ATP5PB,ATP5PD,ATP5PF,ATP6V0A1,ATP6V0A2,ATP6V1B1,AVPR2,BDNF,CALCA,CALCR,CALCRL,CALM1,CALM2,CAP1,CAP2,CASK,CBS,COASY,COQ7,COQ9,COX15,COX4I1,COX5A,COX5B,COX6B1,COX7B,COX7C,CRH,C…			GO: Biological Process	GO:0071345	cellular response to cytokine stimulus	5.45958	ACKR1,ACSL1,ADIPOQ,AGPAT2,AKT1,ALAD,ANGPT1,AQP4,ARG1,ASS1,BBS2,BGN,BST2,CALCA,CAMK2A,CAMK2B,CAMK2G,CARD14,CCL1,CCL11,CCL13,CCL16,CCL18,CCL19,CCL2,CCL20,CCL21,CCL22,CCL23,CCL24,CCL26,CCL3,CCL5,CCL8,CCR1,CCR6,CCR9,CD27,CD44,CD70,CD74,CDC37,CDC5L,CDIP1,CHAD,CHI3L1,CIITA,CLCF1,CLDN18,CNOT9,CNTF,CNTFR,COMMD7,CORO1A,CREBRF,CSF1,CSF1R,CSF2RB,CSF3,CX3CL1,CXCL12,CXCL8,CXCL9,CXCR1,CXCR3,CXCR6,CYBA,DAPK1,DA…			GO: Biological Process	GO:0006812	cation transport	10	ABAT,ABCB11,ABCC1,ABL1,ACACA,ACE,ACE2,ACTN4,ADCYAP1R1,ADRA1A,AHNAK,AKAP6,AKAP9,AKT2,ANK1,ANO10,AP3B1,AQP1,ARL2,ARMC1,ARRB2,ASIC1,ASIC2,ATG5,ATP13A1,ATP13A2,ATP13A3,ATP13A4,ATP1A1,ATP1B1,ATP1B3,ATP1B4,ATP2A1,ATP2A2,ATP2B3,ATP2B4,ATP2C1,ATP2C2,ATP5F1A,ATP5F1D,ATP5MC2,ATP5MC3,ATP5PO,ATP6AP1,ATP6V0A1,ATP6V0C,ATP6V0E1,ATP6V1A,ATP6V1B1,ATP6V1B2,ATP6V1C2,ATP6V1F,ATP6V1G1,ATP6V1G3,AZIN2,BSPRY,BTK,CACNA1A…			GO: Biological Process	GO:0006812	cation transport	10	ABAT,ABCC1,ACACA,ACTN2,ACTN4,ADCYAP1R1,ADORA3,ADRA1A,AHNAK,AKAP5,AKAP6,AKT2,AKT3,ANK1,ANK3,ANO1,AQP2,ARF1,ARG1,ARL2,ASIC2,ASIC3,ASPH,ATF4,ATOX1,ATP12A,ATP13A1,ATP13A2,ATP13A4,ATP1B2,ATP1B4,ATP2A1,ATP2A2,ATP2A3,ATP2B3,ATP2C1,ATP2C2,ATP4A,ATP4B,ATP5F1A,ATP5F1B,ATP5F1D,ATP5MG,ATP5PO,ATP6AP1,ATP6V0A1,ATP6V0A4,ATP6V0B,ATP6V0C,ATP6V0D1,ATP6V0E1,ATP6V1B2,ATP6V1C1,ATP6V1C2,ATP6V1E1,ATP6V1F,ATP6V1H,AZIN2,…			GO: Biological Process
GO: Biological Process	GO:0015849	organic acid transport	10	ABAT,ABCB4,ABCC1,ABCC2,ABCD1,ABCD3,ACE,ACSL1,ACSL5,ACSL6,ADORA2A,AGT,AGTR2,AGXT,AKT1,AKT2,ALB,APBA1,APOE,AQP8,ARG2,ARL6IP5,ATP1A2,AVPR1A,BDKRB2,BSG,CD36,CEACAM1,CLN8,CPT2,CROT,CTNS,CYP4A11,CYP4F2,DRD2,DRD4,EDN1,FABP3,FOLR2,FXYD1,GLS,GOT2,GRIK1,GRM2,GRM7,IRS2,KCNJ10,LCN1,MAP2K6,MAPK9,MIF,MIP,MPC1,MPC2,NCOA1,NCOA2,NCOR1,NF1,NMB,NMUR2,NOS2,NTSR1,OXT,P2RX4,P2RY2,PAK1,PLA2G1B,PLA2G5,PLA2R1,PLIN2,PNPLA…			GO: Biological Process	GO:0045937	positive regulation of phosphate metabolic process	5.73609	ABCA7,ABL1,ACE,ACR,ACSL1,ACSL3,ACVR1B,ACVR2A,ACVRL1,ADAM8,ADAM9,ADCY2,ADCY3,ADCY8,ADCY9,ADCYAP1R1,ADGRD1,ADGRF5,ADNP,ADORA2B,ADRA1B,ADRB3,AJUBA,ALK,ALOX12B,ALS2,ANG,ANGPT1,ANGPT4,ANKRD6,APOC2,APOE,ARHGEF2,ARHGEF5,ARL6IP5,ARRB2,ATG14,ATP2B4,ATP6AP1,AVPR2,AXIN2,AZU1,BAG4,BANK1,BCAR3,BCL2,BIRC7,BMP1,BMP15,BMP6,BMP7,BRAF,BRAT1,BTBD10,C1QTNF1,C3,C5,CAB39,CACUL1,CALCR,CALCRL,CALM1,CALM2,CAMK1,CAP1,CAP2…			GO: Biological Process	GO:0051272	positive regulation of cellular component movement	10	ACTN4,ACVR1B,ADAM10,ADAM8,ADAM9,AGT,AKT1,AKT2,AMOTL1,ANGPT1,ANGPT4,ANXA3,APC,AQP1,ARHGAP5,ATP8A1,BAG4,BCL6,BDKRB1,BMPR2,C1QBP,C3AR1,CALR,CAMK1D,CAPN7,CARMIL1,CBLL1,CCBE1,CCL11,CCL19,CCL2,CCL21,CCL26,CCL3,CCR1,CCR6,CD274,CD74,CDH13,CEMIP,CFAP20,CIB1,CLDN7,COL1A1,CORO1A,CPNE3,CSF1,CSF1R,CXCL1,CXCL10,CXCL12,CXCL14,CXCL3,CXCL9,CXCR2,DDR2,DIAPH1,DMTN,DOCK4,DRD1,EDN1,EDN3,EDNRA,EGFR,ELANE,ELP1,EPB41L4B…			GO: Biological Process	GO:0009199	ribonucleoside triphosphate metabolic process	10	AK1,ALDOA,ALDOC,AMPD2,AMPD3,ATP5F1A,ATP5F1B,ATP5F1C,ATP5F1D,ATP5IF1,ATP5MC1,ATP5MC2,ATP5MC3,ATP5MF,ATP5MG,ATP5PB,ATP5PD,ATP5PF,ATP6V0A1,ATP6V0A2,ATP6V1B1,BDNF,COQ7,COQ9,COX15,COX4I1,COX5A,COX5B,COX6B1,COX7B,COX7C,CTPS1,CTPS2,CYC1,CYCS,DMAC2L,DNM1L,ECD,EIF6,ENO1,ENO2,ENO3,ENTPD1,ENTPD5,GADD45GIP1,GALE,GALK1,GALT,GAPDH,GAPDHS,GCK,GPD1,GPHN,GPI,GUK1,HIF1A,HK2,HK3,HSPA8,HTR2A,IGF1,ITPA,KHK,LDHA,LDHC,…			Pathway	132956	Metabolic pathways	10	ACAA1,ACAA2,ACACA,ACACB,ACADL,ACADS,ACADVL,ACAT2,ACO1,ACP1,ACP2,ACSBG2,ACSL1,ACSL3,ACSL6,ACSM1,ACSM2B,ACSM3,ACSS2,ADH7,ADI1,ADK,ADSSL1,AGL,AGMAT,AGPAT2,AGPAT5,AGXT,AHCY,AHCYL1,AK1,AK5,AK8,AKR1B10,AKR1D1,ALAD,ALAS1,ALAS2,ALDH18A1,ALDH1A2,ALDH1B1,ALDOC,ALG1,ALG12,ALG6,ALG8,ALOX15B,ALOX5,ALPI,AMACR,AMPD1,AOC2,AOX1,APRT,ARG1,ARSB,ASL,ASNS,ASS1,ATIC,ATP5F1A,ATP5F1C,ATP5F1D,ATP5MC1,ATP5MC2,ATP5MF,ATP5M…			GO: Biological Process	GO:0072358	cardiovascular system development	10	ACE,ACTC1,ADAMTS1,ADAMTS6,ADGRB2,ADIPOR2,ADM2,ADRA1A,AGTR1,AHI1,AKAP13,AKAP6,ALDH1A2,ALPK3,ANG,ANGPT1,ANGPT2,ANGPT4,ANKRD17,ANKS6,ANTXR1,ANXA3,AP2B1,APOD,APOE,APOLD1,AQP1,ARHGEF15,ATG5,ATP5IF1,AXIN2,B9D1,BASP1,BAZ1B,BBS4,BCAS3,BECN1,BMP7,BMPR2,BTG1,BVES,C1GALT1,C3,C3AR1,C5,C6,CACYBP,CAD,CALCA,CALR,CAV3,CCBE1,CCL11,CCL2,CCL24,CCM2L,CCN6,CD34,CD36,CDK1,CDX2,CEACAM1,CHD7,CHRNA3,CIB1,CITED1,CLIC4,CMA…			GO: Biological Process	GO:0055074	calcium ion homeostasis	10	ADCYAP1R1,ADRA1A,ADRA1B,ADRA1D,AKAP5,AKAP6,ANXA7,APOE,ASPH,ATP13A1,ATP13A2,ATP13A4,ATP2A1,ATP2A2,ATP2A3,ATP2B3,ATP2C1,ATP2C2,AVPR1B,BBC3,BCAP31,BDKRB1,BDKRB2,BMP4,C1QTNF1,CACNA1A,CACNA1C,CACNA1F,CACNA1I,CACNA2D1,CACNB3,CALCA,CALCR,CALM3,CAMK2D,CAPN3,CASQ1,CASQ2,CCKBR,CCL1,CCL11,CCL19,CCL2,CCL21,CCL23,CCL28,CCL3,CCL5,CCL7,CCL8,CCR10,CCR4,CCR7,CCR9,CD19,CD4,CD40,CD52,CD55,CEMIP,CHRNA10,CHRNA7,CIB2,…			GO: Biological Process
GO: Biological Process	GO:0090407	organophosphate biosynthetic process	10	ABCA1,ABHD5,ACHE,ACSL5,ACSL6,ADCY1,ADCY2,ADCY3,ADCY4,ADCY6,ADCY8,ADCY9,ADCYAP1R1,ADGRD1,ADGRF5,ADK,ADNP,ADORA2A,ADORA2B,ADSS,ADSSL1,AFMID,AGPAT2,AGPAT4,AK1,AK2,AK8,AKAP12,AKAP6,AKR1A1,ALDOA,ALG5,AMPD1,AMPD2,AMPD3,APLP1,APOA2,APOE,AQP1,ARF1,ATIC,ATP5F1A,ATP5F1B,ATP5F1C,ATP5MC3,ATP5MF,ATP5MG,ATP5PF,ATP5PO,ATP6V0A4,CALCR,CALCRL,CALM3,CD244,CDIPT,CDS1,CEPT1,CHKA,CHPT1,CKM,CMPK1,COASY,CPNE3,CPNE6,CPS1…			GO: Biological Process	GO:0071495	cellular response to endogenous stimulus	5.71265	ABCG2,ABHD2,ABL1,ACACA,ACAP2,ACSL1,ACVR2A,ACVRL1,ADAM9,ADAMTS1,ADAMTS7,ADAMTSL2,ADCY2,ADCY3,ADCY8,ADCY9,ADRM1,AHSG,AIFM1,AKAP1,AKAP7,AKAP8,ALDOB,ALPP,ANXA1,ANXA5,AP3S1,APAF1,APEX1,APLP1,APOB,APP,APPL1,APRT,AQP8,AQP9,ARG1,ARHGEF2,ARID1A,ARNTL,ARRB2,ASNS,ASPN,ATP1A1,ATP2B4,ATP6AP1,ATP6V0A2,ATP6V0A4,ATP6V0C,ATP6V0D1,ATP6V0E1,ATP6V1B1,ATP6V1C1,ATP6V1E1,ATP6V1F,ATP6V1G3,AVPR1B,AVPR2,BAG4,BAIAP2,BAIAP2…			GO: Biological Process	GO:0007417	central nervous system development	10	ABCB6,ACAN,ACTL6A,ACVR1B,ADAM23,ADORA2A,AFDN,AFF2,AGT,AGTPBP1,AGTR2,AK2,AK4,AK8,AKAP5,AKT1,ALDH1A2,ANG,ANXA3,APP,AQP1,ARCN1,ARF4,ARHGAP35,ARMC4,ARNT2,ARSA,ARX,ASIC2,ASPM,ATF5,ATG7,ATN1,ATP2B1,ATP2B2,ATP5PB,ATP5PF,ATP6V0D1,ATRN,ATXN2,AVPR2,AXL,BAD,BARHL1,BBS7,BIN1,BMPR2,BOK,BPTF,C16orf45,CA10,CACNA1A,CALM1,CALM3,CASP2,CCDC14,CCDC141,CD9,CDH2,CDH22,CDK5,CDK5RAP2,CDK5RAP3,CELSR2,CEND1,CENPF,CERS1,CH…			GO: Biological Process	GO:0060322	head development	10	AARS,ABAT,ABCB6,ABR,ACAT1,ACSL3,ACTB,ADGRG1,AFF2,AGTPBP1,AK8,ALDH1A2,ALDH1A3,ANXA3,APAF1,APLP1,APLP2,APOD,AQP1,ARCN1,ARID5B,ASCL1,ASPH,ASPM,ATG7,ATIC,ATP2B1,ATP2B4,ATP5PB,ATP5PF,ATP6AP2,ATP6V0D1,AVPR1A,AVPR2,AXL,B3GNT5,BAG3,BAK1,BASP1,BAX,BBS7,BCAN,BCL11B,BMP4,BMPR2,BOK,BPTF,BRAF,BRCA2,BTBD3,BYSL,CALM1,CALM2,CASP3,CBS,CCDC14,CCKAR,CD27,CDH2,CDH22,CDK2AP1,CDK5RAP1,CDK5RAP2,CDK5RAP3,CDON,CELSR2,CEN…			Pathway	83040	Proteasome	4.53407	ADRM1,IFNG,POMP,PSMA1,PSMA2,PSMA3,PSMA4,PSMA5,PSMA6,PSMA7,PSMA8,PSMB2,PSMB3,PSMB4,PSMB5,PSMB6,PSMB7,PSMC3,PSMC4,PSMC5,PSMC6,PSMD14,PSMD2,PSMD3,PSMD6,PSMD7,PSMD8,PSME2,PSMF1,SEM1			GO: Biological Process	GO:0022411	cellular component disassembly	10	AAAS,ACAN,ACIN1,ACTL6A,ACVR1C,ADAMTS4,ADAMTS5,AIFM1,ALPK1,AMBRA1,APEH,ARHGEF2,ATG12,ATG2A,ATG2B,ATG4C,ATG4D,ATG5,ATG9A,ATP13A2,ATP1B1,ATP5IF1,BECN1,BIRC2,BOC,C16orf45,C5,CA7,CAPG,CAPNS1,CAPZB,CARMIL1,CD93,CDC37,CDK1,CDK5RAP3,CFL1,CHMP2A,CHMP2B,CHMP5,CIB1,CKAP2,CLEC16A,CLSPN,CMA1,CNEP1R1,CSNK1A1,CSNK2A2,CTNNB1,CTSG,CTSK,CTSL,CTSS,CTTN,DBNL,DDIT4,DDR2,DEDD2,DFFA,DFFB,DICER1,DNAAF2,DNASE1L3,DNASE2,D…			GO: Biological Process	GO:0030182	neuron differentiation	10	ABI1,ABLIM1,ACHE,ACSL6,ACTB,ADAMTS1,ADCY1,ADGRB1,AGTPBP1,AIFM1,AKAP5,ALCAM,ALDH1A2,ALG10,ALK,ANAPC2,ANK3,ANKRD27,APBB1,APBB2,APOD,APOE,ARF1,ARF4,ARF6,ARFGEF1,ARHGAP35,ARSB,ARX,ASPM,ATCAY,ATF5,ATG7,ATL1,ATXN2,BAIAP2,BCL11A,BIN1,BMP2,BMP4,BMP5,BMP7,BMPR1B,BOC,BRINP2,BRSK1,BRSK2,C1QL1,CABP4,CACNA1A,CACNA1F,CAMK1,CAMK2A,CAMK2B,CAMSAP1,CAPZB,CBFA2T2,CCK,CCL5,CDC42,CDH1,CDH11,CDH4,CDK5,CDK5R1,CDK5RAP2,…			GO: Biological Process
GO: Biological Process	GO:0006520	cellular amino acid metabolic process	10	AADAT,AASDHPPT,ABAT,ACAD8,ACAT1,ACY1,ADSS,ADSSL1,AFMID,AGXT,AGXT2,AHCYL1,AHCYL2,AIMP2,ALDH7A1,AMDHD1,ARG2,ART4,ASL,ASNSD1,ASS1,ATIC,ATP7A,AZIN1,AZIN2,BCAT2,BCKDHA,BCKDK,BHMT,CARNMT1,CDO1,CKB,CKM,CKMT2,CPS1,CRYM,CSAD,CTNS,DALRD3,DARS,DCT,DDC,DDO,DHFR,DHFR2,DLD,DNMT1,DNMT3B,DPEP1,DPYD,EGLN3,EIF2B1,EIF4A3,ENOPH1,ENOSF1,EPRS,ERO1A,ERO1B,FARS2,FARSA,FPGS,FTCD,GAD1,GARS,GATM,GGT5,GHR,GLDC,GLS,GLYAT,GMP…			GO: Biological Process	GO:0000819	sister chromatid segregation	5.70726	AKAP8,AKAP8L,ANAPC10,ANAPC15,ANAPC4,AURKC,AXIN2,B9D2,BIRC5,BUB1,BUB3,CCNB1,CDC14A,CDC20,CDC23,CDC26,CDC27,CDC6,CENPA,CENPC,CENPE,CENPF,CENPI,CENPK,CENPM,CENPN,CENPO,CENPQ,CENPT,CEP57,CEP57L1,CHMP1A,CHMP2A,CHMP2B,CHMP4B,CHMP4C,CHMP6,CHMP7,CSNK2A1,CTCF,CTNNB1,CUL3,DIS3L2,DUSP1,DYNC1LI1,ERCC6L,ESCO1,FBXW7,H2AFY,HORMAD1,HORMAD2,INCENP,ITGB3BP,KIF18A,KIF25,KIF2A,KNL1,KNSTRN,LCMT1,MAD1L1,MAD2L1,MAD2L1B…			GO: Biological Process	GO:0072507	divalent inorganic cation homeostasis	10	ADM,ADRA1A,ADRA1B,ADRA1D,AGT,AGTR1,AKAP5,ANK3,ANXA7,APOE,APP,ASPH,ATG5,ATP1A2,ATP1B1,ATP2A1,ATP2A2,ATP2A3,ATP2B1,ATP2B2,ATP2B3,ATP2C2,BCAP31,BDKRB1,BDKRB2,C1QTNF1,C3AR1,CACNA1A,CACNA1F,CACNA1G,CACNA1I,CACNA2D1,CACNB3,CALB1,CALCR,CALM1,CALM3,CALR,CAPN3,CASR,CCDC47,CCL1,CCL11,CCL19,CCL2,CCL21,CCL23,CCL28,CCL3,CCR1,CCR4,CCR6,CCR9,CD36,CD4,CD40,CEMIP,CLEC4C,CLIC2,CLSTN1,CNNM2,CNNM4,CORO1A,CRHR1,CTRC,…			GO: Biological Process	GO:0009116	nucleoside metabolic process	10	ABHD14B,ACACA,ACACB,ADK,ADSS,AHCY,AHCYL1,AHCYL2,AK1,ALDOA,ALDOC,AMPD2,AMPD3,APOBEC2,APOBEC3G,APRT,ATIC,ATP5F1A,ATP5F1B,ATP5F1C,ATP5F1D,ATP5IF1,ATP5MC1,ATP5MC2,ATP5MC3,ATP5MF,ATP5MG,ATP5PB,ATP5PD,ATP5PF,ATP6V0A1,ATP6V0A2,ATP6V1B1,BDNF,BHMT,BHMT2,CASK,CDA,COASY,COQ7,COQ9,COX15,COX4I1,COX5A,COX5B,COX6B1,COX7B,COX7C,CROT,CTPS1,CTPS2,CYC1,CYCS,DHODH,DLG1,DLG2,DLG4,DMAC2L,DNM1L,DNMT3A,DNPH1,DUT,ECD,EIF…										GO: Biological Process	GO:0006629	lipid metabolic process	10	AADAC,ABCB11,ABCC1,ABCD1,ABCD2,ABHD12,ABHD3,ABHD6,ACAA2,ACACA,ACAD10,ACADL,ACADS,ACADVL,ACAP1,ACAT2,ACBD3,ACER1,ACHE,ACOT11,ACOT2,ACOT8,ACSBG2,ACSL1,ACSL5,ACSM1,ACSM2B,ACSM3,ACSS1,ACSS2,ADH4,ADIPOR2,AFP,AGPAT2,AGPAT3,AGTR1,AKR1D1,AKT2,ALDH1A1,ALDH1A2,ALDH1A3,ALDH3B2,ALG1,ALG12,ALG13,ALG14,ALG2,ALG3,ALG5,ALG6,ALOX12B,ALOX15B,ALOX5,ALOX5AP,ALOXE3,AMACR,AMBRA1,ANG,ANGPTL8,APOA5,APOC4,APOD,APOE,APOL1…			GO: Biological Process	GO:0006629	lipid metabolic process	10	AACS,ABCA1,ABCA4,ABCC1,ABCD1,ABCD2,ABCD3,ABCG1,ABHD5,ABHD6,ACAA1,ACAA2,ACACA,ACAD10,ACAD8,ACADL,ACADS,ACADVL,ACAP1,ACER1,ACHE,ACOT11,ACOT4,ACOT7,ACOT8,ACOX3,ACSBG1,ACSL3,ACSL6,ACSM1,ACSM6,ADH4,ADH7,ADIPOQ,ADIPOR2,ADORA2B,AGPAT5,AGPS,AKR1B10,AKR1C2,AKR1D1,AKT2,ALDH1A1,ALDH1A2,ALDH3B2,ALG1,ALG10,ALG12,ALG14,ALG3,ALG9,ALKBH7,ALOX12,ALOX15,ALOXE3,ANG,ANGPTL8,APLP2,APOA2,APOB,APOBEC1,APOBR,APOC1,APOC2…			GO: Biological Process
GO: Biological Process	GO:0051223	regulation of protein transport	10	AACS,ABAT,ABCC8,ACHE,ACSM6,ADORA2A,AGT,AGTR2,AHI1,AKAP1,AKAP6,AKT2,ALOX15B,ANG,ANXA5,APBB1,APC2,APOA2,ARF1,ARHGEF5,ARL2,ASPH,ATG13,ATG5,ATP13A2,AXIN1,BAD,BAMBI,BAP1,BCAS3,BIRC5,BMP4,BMP6,BMP7,BRSK2,BTN1A1,C2CD2L,C5AR2,CACNA1C,CACNA1D,CAMK4,CARD8,CASP1,CASR,CCDC22,CCL13,CCL19,CCL3,CCR7,CD14,CD244,CD27,CD274,CD300C,CD36,CD40,CD58,CD84,CDC42,CDK1,CDK16,CDK5,CDKL2,CDKN2A,CEACAM1,CEP131,CFTR,CHP1,CIB1…			GO: Biological Process	GO:0030029	actin filament-based process	5.66687	ABI2,ABL1,ACAP2,ACTG1,ACTN1,ACTR2,ACTR3B,ADD2,ALKBH4,ALMS1,AMOT,ANG,ANKRD23,ANTXR1,ANXA1,APBB1,APBB2,AQP2,ARF6,ARFGEF1,ARFIP1,ARFIP2,ARHGAP17,ARHGAP18,ARHGAP26,ARHGDIB,ARHGEF11,ARHGEF19,ARHGEF2,ARHGEF5,ARPC1B,ARPC2,ARPC4,ARPC5L,ATP1A1,AVIL,BAG4,BAIAP2,BAIAP2L1,BAIAP2L2,BCAR1,BCAS3,BCL2,BCL6,BCR,BRAF,BRSK2,BST2,CACNA2D1,CAP1,CAPZA2,CAPZB,CASP4,CASQ2,CAV3,CAVIN3,CCL11,CCL24,CCN2,CDC42,CDC42BPB,CDC4…			GO: Biological Process	GO:0006875	cellular metal ion homeostasis	10	ABCB6,ABCB7,ADM,ADRA1A,ADRA1B,ADRA1D,AGT,AGTR1,AGTR2,AKAP5,ANXA7,APOE,APP,ARF1,ASPH,ATG5,ATP1A2,ATP1B1,ATP1B2,ATP2A1,ATP2A2,ATP2A3,ATP2B1,ATP2B2,ATP2B3,ATP2C2,BCAP31,BDKRB1,BDKRB2,C1QTNF1,C3AR1,C7,CACNA1A,CACNA1F,CACNA1G,CACNA1I,CACNA2D1,CACNB3,CALB1,CALCR,CALM1,CALM3,CALR,CAPN3,CASR,CCL1,CCL11,CCL19,CCL2,CCL21,CCL23,CCL28,CCL3,CCR1,CCR4,CCR6,CCR9,CD36,CD4,CD40,CEMIP,CLEC4C,CLIC2,CLSTN1,COMMD1,CO…			GO: Biological Process	GO:0060341	regulation of cellular localization	10	AAAS,AACS,ABAT,ABCA12,ABR,ACSL3,ACSM6,ACVR2A,ADAM8,ADAM9,ADCYAP1R1,ADIPOQ,ADORA1,ADORA2B,ADORA3,AGT,AGTR1,AKAP1,AKAP6,AKAP8L,AKT1,ANXA1,AP2M1,APBB1,APC,APLN,APOA2,APOD,APPL1,AR,ARF1,ARF6,ARL2,ARL2BP,ARRB1,ASIC1,ASPH,ATG7,ATP13A2,ATP5IF1,ATP6AP1,AVPR1A,AXIN2,BAG4,BAK1,BANK1,BAP1,BAX,BBC3,BCAP31,BCL2L1,BCL3,BDKRB1,BET1L,BLK,BMP4,BMP7,BRAF,BRSK2,BTN1A1,BVES,C1QTNF3,CABP1,CACNA1B,CACNA1C,CACNA1E,CACN…			Cluster [0.073:0.339]							GO: Biological Process	GO:0007167	enzyme linked receptor protein signaling pathway	10	ABI1,ABL1,ACTB,ACTR3,ACVR1C,ACVR2A,ADAM9,ADAMTS3,ADAMTSL2,AFP,AHI1,AKT1S1,AKT2,ANGPT1,ANGPT2,ANGPT4,AP2A1,AP2A2,AP2B1,AP2M1,AP2S1,APH1A,APOD,ARHGEF7,ARPC1A,ARPC4,ARRB2,ATP6AP1,ATP6V0A1,ATP6V0C,ATP6V0E1,ATP6V1A,ATP6V1B1,ATP6V1B2,ATP6V1C2,ATP6V1F,ATP6V1G1,ATP6V1G3,ATXN7,BAIAP2L1,BAIAP2L2,BCL9,BCR,BLNK,BMP3,BMP5,BMP6,BMP7,BMP8B,BMPR1B,BMPR2,BRK1,BTBD11,BTK,CAV3,CBL,CBLC,CCBE1,CCL2,CD109,CD3E,CD4,CD8…			GO: Biological Process	GO:0007167	enzyme linked receptor protein signaling pathway	10	ABI1,ACTB,ACTR2,ACVR1,ACVR1B,ACVRL1,ADAM10,ADAM17,ADAMTS3,ADIPOQ,ADRM1,AFAP1L2,AGR2,AGTR2,AHSG,AKAP3,AKT1S1,AKT2,ALK,AMHR2,ANGPT4,ANGPTL1,AP2A1,AP2M1,AP2S1,AP3S1,APH1B,APLP2,APOD,AR,ARF4,ARHGEF18,ARHGEF7,ARPC1A,ARPC4,ASPN,ATOH8,ATP6AP1,ATP6V0A1,ATP6V0A4,ATP6V0B,ATP6V0C,ATP6V0D1,ATP6V0E1,ATP6V1B2,ATP6V1C1,ATP6V1C2,ATP6V1E1,ATP6V1F,ATP6V1H,ATXN7,BAIAP2,BAIAP2L1,BCAR1,BCR,BDKRB2,BMP1,BMP2,BMP4,BMP5,…			GO: Biological Process
GO: Biological Process	GO:0003015	heart process	10	ACE,ACTC1,AGT,AGTR2,AHCYL1,AKAP13,AKAP6,AKAP9,APLN,ASPH,ATG5,ATP1A2,ATP1B1,ATP1B2,ATP1B3,ATP2A1,ATP2A3,ATP2B1,ATP2B2,ATP2B3,AVPR1A,CACNA1B,CACNA1C,CACNA1D,CACNA1F,CACNA1H,CACNA1S,CACNA2D4,CACNB1,CACNB3,CACNG1,CACNG3,CALM3,CAMK2D,CASQ1,CAV3,CDC42,CELF2,CHRM2,CHRNA7,CLIC2,CORIN,CRHR2,DMD,DMPK,DRD2,DSC2,EDN1,EDN3,EPAS1,FGF12,FOXN4,FXYD1,FXYD4,GATA4,GJA5,GLRX3,GNAI2,GNAO1,GSK3A,GSTO1,HBEGF,HDAC4,HRC,…			GO: Biological Process	GO:0051248	negative regulation of protein metabolic process	5.62717	A2M,A2ML1,AATF,ABCA7,ABL1,ACE2,ACOT8,ADARB1,AHSG,AJUBA,AKAP1,AKT1S1,AMBP,ANAPC10,ANAPC15,ANAPC2,ANAPC4,ANAPC5,ANAPC7,ANG,ANGPT1,APBB1,APOD,APOE,APP,ARFGEF3,ARRB2,ASB1,ASH1L,ASPN,ATG14,ATP13A2,ATP2B4,AZIN1,AZIN2,BAG4,BAG5,BANK1,BANP,BCDIN3D,BCOR,BDKRB2,BGN,BIRC5,BIRC6,BIRC7,BMP7,BST2,BUB1,BUB3,C3,C3orf33,C5,CALM1,CALM2,CAMK2N2,CAPRIN1,CAPRIN2,CASP3,CASP8,CAV3,CBLC,CCNB1,CD109,CD27,CD276,CD2BP2,CD4…			GO: Biological Process	GO:0051130	positive regulation of cellular component organization	10	ABCA7,ABI2,ABLIM3,ACE2,ACHE,ACSL6,ACTL6A,ACTN2,ACTN4,ACTR2,ADAM9,ADAMTS1,ADD1,ADGRB1,ADGRB3,ADGRE5,ADGRL1,ADGRL2,ADGRL3,ADNP,AGR2,AGT,AHSG,AJUBA,AKAP5,AKAP8L,AKT1,AKT2,ALOX15,AMBRA1,ANAPC2,ANGPT1,ANK1,ANK3,ANKFY1,ANXA13,AP1AR,APC,APOA5,APOC2,APOE,AQP1,ARAP1,ARF1,ARFIP2,ARHGAP35,ARL2,ARPC1A,ARPC1B,ARPC4,ASIC2,ATG13,ATG5,ATP8A1,ATR,AXIN2,AXL,AZU1,BAD,BAG4,BAIAP2,BAIAP2L1,BAIAP2L2,BAMBI,BCL6,BCLAF1,…			GO: Biological Process	GO:0044772	mitotic cell cycle phase transition	10	ABCB1,ACTR1A,ACVR1,ACVR1B,AKAP9,AKT1,ANAPC15,ANAPC16,ANAPC2,ANAPC4,ANAPC5,ANXA1,APC,ARPP19,BAX,BCAT1,BLM,BRD7,BRSK2,BTRC,BUB1,CALM1,CALM2,CAMK2A,CAMK2D,CARM1,CCNB2,CCNB3,CCND1,CCND2,CCNH,CDC14A,CDC16,CDC25A,CDC25C,CDC27,CDC34,CDC6,CDC73,CDK1,CDK14,CDK3,CDK5RAP2,CDK5RAP3,CDKN1A,CDKN2C,CENPE,CENPF,CEP57,CEP63,CEP70,CHEK1,CHMP2A,CHMP7,CIT,CKAP5,CNOT1,CNOT3,CNOT4,CNOT7,CRADD,CRLF3,CSNK1D,CSNK1E,CSNK2…			Category	ID	Title (or Source)	Cluster logP	Cluster GeneSet			GO: Biological Process	GO:0009887	animal organ morphogenesis	10	ABL1,ABLIM1,ACP5,ACTC1,ACTG2,ADAMTS1,ADAMTS16,AGTR1,AHI1,ALDH1A1,ALDH1A2,ALDH1A3,ALPL,ALX1,AMELX,ANGPT1,ANKRD6,AP2A1,AP2A2,AP2B1,AP2M1,AP2S1,APLP1,AQP1,AQP3,AQP5,ARRB2,ATP6V1B1,AXIN2,BARX2,BASP1,BAZ1B,BBS4,BCR,BGLAP,BMP6,BMP7,BMPR1B,BMPR2,BRAF,BTBD7,BTRC,CABP4,CALB1,CARM1,CAV3,CBS,CCL11,CCL2,CCM2L,CD34,CDX2,CEACAM1,CELSR1,CELSR2,CHD7,CHRNA10,CITED1,CLRN1,CLTC,CNGA3,CNTF,COL1A1,COL1A2,COL27A1,COL4…			GO: Biological Process	GO:0060429	epithelium development	10	ABCA12,ABI1,ACADVL,ACAT1,ACER1,ACTA2,ACVR1,ACVR1B,ACVRL1,ADAM17,ADAMTS16,ADAMTS20,ADAMTSL4,ADIPOQ,ADRM1,AFDN,AGR2,AGTR2,AKR1C2,AKT2,ALDH1A1,ALDH1A2,ALG10,ALOX12,ALOXE3,ALPI,ALX4,ANKRD6,ANXA4,ANXA7,AP2A1,AP2M1,AP2S1,APAF1,APCDD1,AQP3,AR,ARHGAP24,ARHGAP35,ARID4A,ARID4B,ARX,ATOH8,ATP2A2,ATP2C1,ATP2C2,AXIN2,B4GALT1,B9D1,BARX1,BARX2,BASP1,BFSP1,BFSP2,BMP2,BMP4,BMP5,BMP7,BMPR1A,BNC1,BRCA2,BTG1,CAPN5,CA…			GO: Biological Process
GO: Biological Process	GO:0070482	response to oxygen levels	10	ABAT,ACAA2,ACTN4,ADAM17,AGTRAP,AIFM1,AKT1,ALAD,ALAS2,ALKBH5,ALOX5,ANG,ANGPT2,ANGPT4,APOLD1,AQP1,ATP1B1,BAD,BBC3,BCL2,BDKRB2,BECN1,BMP7,BNIP3,CAMK2D,CAMK2G,CASP1,CHCHD2,CHRNA7,CHRNB2,CIAO3,COL1A1,CPEB2,CPEB4,CREB1,CREBBP,CRHR1,CRYAA,CRYAB,CUL2,CXCL12,CYBB,CYGB,CYP1A1,DNMT3B,DPP4,DRD2,E2F1,ECE1,EDN1,EDNRA,EEF2K,EGLN3,EIF4EBP1,ENG,EPAS1,EPO,ERO1A,FAM162A,FLT1,FMN2,FOSL2,GATA6,GNGT1,GPR182,HDAC2,HIF1…			GO: Biological Process	GO:0030334	regulation of cell migration	5.60288	AAMP,ABCC1,ABHD2,ABHD6,ABI3,ACE,ACP5,ACVR1B,ACVRL1,ADAM10,ADAM15,ADAM8,ADAM9,ADARB1,AJUBA,ALOX12,ALOX15B,AMOT,ANGPT1,ANGPT2,ANGPT4,ANXA1,AOC3,APEX1,APOD,APOE,ARAP3,ARHGAP4,ARHGAP5,ARHGDIB,ARHGEF7,ARPC2,ATOH8,BAG4,BCAR1,BCAS3,BCL2,BCR,BRAF,BST2,C16orf45,C5,C5orf30,CAMK1D,CAPN7,CBLL1,CCL11,CCL19,CCL2,CCL24,CCL28,CCL3,CCL4,CCL7,CCL8,CCR6,CD274,CD74,CDH13,CDK5,CEACAM1,CERS2,CHRD,CIB1,CMKLR1,CNN2,COL1…			GO: Biological Process	GO:0048514	blood vessel morphogenesis	10	ACE,ACVRL1,ADAM15,ADAM8,ADAMTS1,ADD1,ADGRB1,ADGRB3,ADIPOR2,ADM,ADM2,AGT,ANG,ANGPT1,ANGPT2,ANGPT4,ANGPTL6,ANPEP,ANXA3,APOB,APOE,APOH,AQP1,ARHGAP22,ARHGAP24,ASB4,ATP5F1B,BECN1,C1GALT1,C3,C3AR1,C5,CASP8,CCBE1,CCDC80,CCL11,CCL2,CCM2,CCN6,CD36,CDH13,CDH2,CHI3L1,CIB1,CITED2,CLIC4,CMA1,COL15A1,COL4A2,COL8A2,CUL7,CXCL10,CXCL12,CXCR2,CXCR3,DLL4,EDN1,EDNRA,EGF,EGFL7,EIF2AK3,ENPEP,EPAS1,EPHA1,EPHB2,EPO,ERBB…			GO: Biological Process	GO:0031347	regulation of defense response	10	ABR,ACE,ACE2,ACIN1,ACP5,ADAM8,ADAR,ADIPOQ,ADORA1,ADORA2B,ADORA3,AGT,AGTR1,AHSG,ANXA1,AP1B1,AP1S1,AP1S2,AP2A2,AP2B1,AP2M1,AP2S1,APOBEC3G,APOD,ARF1,ARF6,ASB2,ASH1L,BCL10,BIRC2,BTRC,C1QBP,C1QTNF3,C4BPA,C4BPB,C5orf30,C6,C7,C8A,C8B,C8G,C9,CA7,CADM1,CALCRL,CASP1,CASP8,CCL1,CCL11,CCL13,CCL16,CCL18,CCL23,CCL24,CCL26,CCL3,CCL4,CCL5,CCL8,CCN3,CD14,CD180,CD226,CD28,CD37,CD55,CD6,CD86,CD8B,CD93,CD96,CDC37,CH…			GO: Biological Process	GO:0000226	microtubule cytoskeleton organization	10	AK7,AP1G1,APC,ARHGEF2,ARL2,ARMC4,ATXN3,ATXN7,AUNIP,AURKA,AURKB,AURKC,BECN1,BICD1,BIRC2,BIRC3,BIRC5,CC2D2A,CCDC114,CCDC155,CCDC40,CCNB1,CCNF,CDC14A,CDK5R1,CDKN1B,CENPA,CEP57,CEP57L1,CEP63,CEP68,CETN3,CHEK1,CHEK2,CHMP2A,CHMP5,CIB1,CKAP2,CNP,CNTROB,CRIPT,CROCC,CTNNB1,CUL9,DAG1,DCTN6,DICER1,DISC1,DNAAF2,DNAAF4,DNAAF5,DNAH5,DYNC1LI1,ESPL1,EYA1,FBXW5,FGF10,FIGN,FIGNL1,GAPDH,GAS2L1,GAS2L2,GPSM2,HDAC6,IF…			GO: Biological Process	GO:0044283	small molecule biosynthetic process	10	ABAT,ABCB11,ABHD3,ACAA2,ACACA,ACADL,ACADVL,ACAT1,ACER1,ACHE,ACOT8,ACSM1,ACSM3,ACSS1,ACSS2,ADCYAP1R1,ADI1,AGXT2,AKR1A1,AKR1D1,ALDH18A1,ALDH1A1,ALDH1A2,ALDH1A3,ALDH4A1,ALDH9A1,ALDOC,ALOX12B,ALOX15B,ALOX5,ALOX5AP,ALOXE3,AMACR,APOA5,APOE,ARV1,ASL,ASPA,ATF3,ATIC,ATP2B4,ATP5IF1,AVPR1A,BCAT1,BDH2,BMP5,BMP6,BPGM,CACNA1H,CAD,CBS,CD74,CDO1,CEACAM1,CHKA,CHPT1,COQ2,COQ3,COQ5,COQ6,COQ7,COQ9,CPS1,CTH,CYB5R2,CY…			GO: Biological Process	GO:0043269	regulation of ion transport	10	ABAT,ABCA7,ACSL6,ACTN2,ACTN4,ADCYAP1R1,AGTR2,AHNAK,AKAP5,AKAP6,AKT2,AKT3,ANK3,ANO1,APOE,AQP2,ARF1,ARG1,ASIC2,ASPH,ATF4,ATP1B2,ATP2C2,ATP4A,ATP4B,BDKRB1,BEST1,BMP4,BPIFA1,CA7,CACNA1A,CACNA1C,CACNA1F,CACNA1H,CACNA1I,CACNA1S,CACNA2D1,CACNB1,CACNB2,CACNB3,CACNG7,CALCA,CALM3,CAMK2A,CAMK2B,CAMK2D,CAMK2G,CAPN3,CASK,CASQ1,CASQ2,CATSPER3,CBARP,CCK,CCL2,CCL3,CCL4,CCL5,CD19,CD4,CD84,CEMIP,CFTR,CHP1,CHRNA3,C…			GO: Biological Process
GO: Biological Process	GO:0034504	protein localization to nucleus	10	AGT,AGTR2,AKAP1,AKAP6,AKR1C3,AKT1,APC2,ARL2,AXIN1,BAMBI,BBS4,BMP4,BMP6,BMP7,CALR,CCDC22,CCL19,CCT2,CCT3,CCT4,CCT6A,CCT7,CCT8,CD27,CD36,CDK1,CDK5RAP3,CDKN2A,CEACAM1,CEP57,CFL1,CHP1,CIZ1,CLDN18,COL1A1,CREB3,CSF3,CTDNEP1,CTNNB1,CYLD,DAB2IP,DACT1,DACT3,DAG1,DCLK2,DMAP1,DNAJB6,DYRK2,ECT2,EDA,F2R,FAF1,FAM89B,FBXO4,FGF9,FYB1,GCKR,GDF5,GLI3,GNAQ,HCLS1,HDAC3,HDGF,HIKESHI,HNRNPM,HSP90AB1,HSPA8,IGF1,IL10,IL…			GO: Biological Process	GO:0048732	gland development	5.57032	ABL1,ACADM,ACAT1,ADRM1,AK2,ALDH1A2,ALDH9A1,ALDOB,ALOX15B,ANXA1,APRT,ARF6,ARG1,ARHGAP5,ASCL1,ASL,ASNS,ATP2B2,ATP2C2,BCL11B,BCL2,BCL2L11,BMP7,BRAF,BTBD7,CAV3,CBX7,CCDC39,CCDC40,CCL11,CCNB2,CCND1,CD44,CDC42,CDKN1B,CDKN2A,CDO1,CEACAM1,COBL,CREB1,CRH,CRHR1,CRKL,CSF1,CSF1R,CSN2,CTNNB1,CUL3,CYP17A1,CYP19A1,CYP7B1,DBP,DKK3,DNAAF1,DRD2,EAF2,EDA,EDAR,EDARADD,EGF,ELF3,EP300,EPHA2,ESR1,ETS1,ETV4,EZR,FADD,FBX…			GO: Biological Process	GO:0050801	ion homeostasis	10	ABCA1,ABCB6,ABCB7,ABCC2,ADM,ADORA2A,ADRA1A,ADRA1B,ADRA1D,AGT,AGTR1,AGTR2,AKAP5,ANK1,ANK3,ANPEP,ANXA7,APOE,APP,ARF1,ASPH,ATG5,ATP1A2,ATP1B1,ATP1B2,ATP2A1,ATP2A2,ATP2A3,ATP2B1,ATP2B2,ATP2B3,ATP2C2,ATP4B,ATP5F1B,ATP6V0A4,ATP6V0D1,ATP6V0D2,ATP6V0E1,ATP6V1F,ATP6V1H,AVPR2,BCAP31,BDH2,BDKRB1,BDKRB2,C1QTNF1,C3AR1,C7,CA14,CA4,CA7,CACNA1A,CACNA1F,CACNA1G,CACNA1I,CACNA2D1,CACNB3,CALB1,CALCR,CALM1,CALM3,CALR…			GO: Biological Process	GO:2000147	positive regulation of cell motility	10	AAMP,ABCC1,ACP5,ACVR1,ACVR1B,ADAM8,ADAM9,ADORA3,AGT,AKT1,ALOX12,AMOT,ANGPT4,ANXA3,APC,AQP1,ARHGAP5,ATP8A1,BAG4,BDKRB1,BMP4,BMPR2,C1QBP,CALR,CAMK1D,CAMK2D,CAPN7,CARMIL1,CCL11,CCL13,CCL19,CCL20,CCL21,CCL24,CCL26,CCL3,CCL4,CCL5,CCL8,CD274,CDH13,CFAP20,CLDN7,COL18A1,COL1A1,CORO1A,CSF1,CSF1R,CXCL1,CXCL10,CXCL11,CXCL13,CXCL16,CXCL5,CXCL6,CXCL9,CXCR2,DAB2IP,DAPK2,DMTN,DRD1,EDN3,EGFR,ELANE,ELP1,ELP3,ENPP…			GO: Biological Process	GO:0000280	nuclear division	10	AKAP8,ANAPC10,ANAPC13,ANAPC15,ANAPC4,ANAPC7,APC,ARHGEF2,ARL8A,AURKA,AURKB,AURKC,BABAM1,BECN1,BIRC2,BIRC3,BIRC5,BRSK2,BTC,BUB1B,CAV2,CCDC155,CCNA2,CCNB1,CCNB2,CCNF,CDC14A,CDC20,CDC23,CDC25C,CDC27,CDC6,CDCA3,CDCA5,CDK3,CEP164,CEP55,CEP57,CEP57L1,CEP63,CETN3,CHEK1,CHEK2,CHMP2A,CHMP5,CIT,CKS2,CSNK1A1,CSNK2A1,CSNK2A2,CUL9,DCLRE1A,DDX4,DLGAP5,DRD3,DSN1,DYNC1LI1,EDN1,ERCC6L,EREG,ESPL1,ESR1,FAM83D,FANCM,…			GO: Biological Process	GO:0009725	response to hormone	10	AANAT,ABCA3,ACACA,ACADS,ACAT1,ACSL1,ACVR1C,ADAM9,ADAMTS1,ADCY1,ADCY4,ADCY6,ADCYAP1R1,ADIPOR2,ADRA1A,AGL,AGTR1,AGTRAP,AIFM1,AKAP13,AKAP8,AKT2,ALDH1A2,ALPL,ANG,ANXA3,APEX1,APRT,AQP1,ARNT2,ARRB2,ARSA,ARSB,ATP1A1,ATP2A1,ATP2A2,ATP6AP1,ATP6V0A1,ATP6V0C,ATP6V0E1,ATP6V1A,ATP6V1B1,ATP6V1B2,ATP6V1C2,ATP6V1F,ATP6V1G1,ATP6V1G3,AVPR1A,AVPR1B,AVPR2,BAD,BAIAP2L1,BAIAP2L2,BBS4,BCAS3,BGLAP,BMP6,BMP7,BRAF,BTG2,BU…			GO: Biological Process	GO:0007420	brain development	10	ABAT,ABCB6,ACAT1,ACSL3,ACTB,AFDN,AFF2,AGTPBP1,AGTR2,AK2,AK4,AK7,AK8,AKAP5,ALDH1A2,ANXA3,APAF1,APLP1,APLP2,APOD,ARF4,ARHGAP35,ARMC4,ARNT2,ARX,ASPM,ATF5,ATG7,ATP6V0D1,ATXN2,AVPR2,BAG3,BASP1,BCR,BMP2,BMP4,BMPR1A,BOK,BRCA2,C16orf45,CACNA1A,CALM3,CASP2,CBS,CCDC14,CD27,CDC42,CDH1,CDH22,CDK5,CDK5R1,CDK5RAP2,CDK5RAP3,CEP120,CERS1,CHD5,CHD8,CHRD,CHRNB2,CITED1,CKB,CMA1,CNP,CNTN1,CNTN2,CNTN4,COL3A1,COL4A1,C…			GO: Biological Process
GO: Biological Process	GO:0010638	positive regulation of organelle organization	10	ACD,ACSM6,ACTR3B,AKAP8,AKT2,ANK1,AP1AR,APOPT1,ARF1,ARF6,ARFIP2,ARHGEF5,ARL2,ARPC1A,ARPC4,ARPC5,ATG13,ATG5,ATR,BAD,BAIAP2L1,BAK1,BAP1,BAX,BBC3,BBS4,BCAS3,BCL2,BCL2L11,BECN1,BID,BIRC5,BNIP3,BRAF,BRD7,BTC,C1QBP,CALCOCO2,CAMK2B,CASP8,CAV3,CCL21,CCL26,CCR7,CCT2,CCT3,CCT4,CCT6A,CCT7,CCT8,CDC42EP3,CDK5,CDK5RAP1,CDKL2,CENPJ,CFL1,CFL2,CHTOP,CIDEB,CNOT6L,CSF3,CSNK2A2,CTBP1,CTNNB1,CTSK,CTTN,CUL3,CYB5R1,DAZL…			GO: Biological Process	GO:0046903	secretion	5.55608	A1BG,A2M,ABAT,ABCB11,ABCC3,ABL1,ACE,ACHE,ACSL3,ACTN1,ACVR2A,ADAM8,ADAM9,ADORA2B,AGR2,AGXT,AHSG,ALB,ALOX12B,ALOX15B,ANG,ANGPT1,ANK1,ANO1,ANXA1,ANXA4,ANXA5,AP1G1,APBB1,APOA2,APP,APRT,AQP5,AQP8,AQP9,ARFGAP3,ARFGEF1,ARFGEF2,ARFIP1,ARHGAP17,ARHGAP44,ARHGEF7,ARL2,ARNTL,ATP13A2,ATP2B2,ATP6AP1,AVPR2,AXL,BAIAP3,BANK1,BCR,BDKRB2,BGLAP,BIRC5,BLK,BLOC1S6,BMP6,BRAF,BRPF3,BRSK1,BRSK2,BTN1A1,C1QTNF1,C1QTNF5,C5,…			GO: Biological Process	GO:0034762	regulation of transmembrane transport	10	ACE,ACSL6,ACTN2,ACTN4,AGT,AHCYL1,AHNAK,AKAP9,AKT1,AKT2,ANK3,APOA2,ARF1,ASIC2,ASPH,ATG5,ATP1A2,ATP1B1,ATP1B2,ATP2C2,AZIN2,BDKRB1,BPIFA1,CACNA1A,CACNA1D,CACNA1E,CACNA1F,CACNA1G,CACNA1H,CACNA1I,CACNA1S,CACNA2D1,CACNA2D2,CACNA2D4,CACNB1,CACNB3,CACNG1,CACNG3,CACNG4,CACNG6,CACNG7,CALM1,CALM3,CAPN3,CASK,CASR,CATSPER3,CBARP,CCL2,CCL3,CEMIP,CFTR,CLCN1,CLCN3,CLCN4,CLCN5,CLCNKA,CLCNKB,CLEC4C,CLIC2,CLIC3,CLI…			GO: Biological Process	GO:0043069	negative regulation of programmed cell death	10	AARS,ACTC1,ACVR1,ADAM8,ADAR,ADNP,ADORA1,AGAP2,AGO4,AGT,AGTR1,AIPL1,AKT1,ALOX12,ANGPT4,ANXA1,APBB2,APC,API5,AQP1,AR,ARHGEF2,ARRB1,ASCL1,ASNS,ATG7,AXL,AZU1,BAG3,BAG4,BAX,BCL10,BCL11B,BCL2A1,BCL2L1,BCL2L10,BCL3,BDNF,BEX3,BIRC2,BIRC6,BLK,BLM,BMP4,BMP7,BNIP1,BNIP2,BRAF,CAMK1D,CAPN3,CASP3,CASP8,CAT,CBS,CBX4,CCL19,CCL21,CCL5,CD27,CD38,CDK1,CDK11A,CDKN1A,CEP63,CFDP1,CFL1,CFLAR,CHD8,CIAPIN1,CITED1,CLCF1,C…			GO: Biological Process	GO:0051301	cell division	10	AATF,ANAPC10,ANAPC13,ANAPC15,ANAPC4,ANAPC7,ANXA11,APC,ARHGEF2,ARL3,ARL8A,AURKA,AURKB,AURKC,BABAM1,BECN1,BIRC5,BLM,BRSK2,BTC,BUB1B,CALM2,CAV2,CCNA2,CCNB1,CCNB2,CCNF,CCNO,CCNT2,CDC123,CDC14A,CDC20,CDC23,CDC25C,CDC27,CDC6,CDC7,CDCA3,CDCA5,CDK14,CDK3,CDK4,CEP164,CEP55,CEP63,CETN3,CHEK1,CHEK2,CHMP2A,CHMP5,CIB1,CIT,CKAP2,CKS2,CNTRL,CNTROB,CSNK1A1,CSNK2A1,CSNK2A2,CUL9,CUZD1,CXCR5,DCLRE1A,DICER1,DLGAP5,D…			GO: Biological Process	GO:0016477	cell migration	10	ABCC1,ABHD6,ABI2,ABI3,ACE,ACP5,ACTN4,ACVR1C,ADAM9,ADARB1,AGTR1,AKT2,ALOX15B,ALX1,AMOTL1,ANG,ANGPT1,ANGPT2,ANGPT4,ANXA3,AOC3,APEX1,APOD,APOE,AQP1,ARAP3,ARHGAP4,ARHGDIB,ARHGEF7,ARRB2,ARSB,ARX,ASCL1,ATP1B1,ATP1B3,AVL9,AZU1,BBS4,BCAS3,BCR,BMP5,BMPR2,BRAF,BST2,BTG1,BVES,C16orf45,C1QBP,C3AR1,C5,CALCA,CALR,CAP1,CAPN7,CARMIL1,CCBE1,CCK,CCL11,CCL16,CCL2,CCL20,CCL22,CCL24,CCL25,CCL28,CCL4,CCL8,CCR1,CCR4,CC…			GO: Biological Process	GO:0007267	cell-cell signaling	10	AACS,ABAT,ABHD6,ACHE,ADAM10,ADGRL1,ADIPOQ,ADORA3,ADRA1A,ADRA1B,ADRA1D,ADRB3,AFDN,AGTR2,AKAP5,ANAPC2,ANO1,ANXA9,APBA1,APBA2,APBA3,APLN,APOE,AR,ARF1,ARHGEF7,ARL2,ARL2BP,ASH1L,ASIC2,ATAD1,ATG7,ATP2A2,BAIAP2,BAIAP3,BARX1,BCHE,BGLAP,BIRC5,BMP2,BMP4,BRSK1,BRSK2,BTK,C1QA,C1QTNF1,C2CD2L,CA7,CACNA1A,CACNA1C,CACNB1,CACNB2,CACNB3,CACNG7,CADPS,CADPS2,CALCA,CAMK2A,CAMK2B,CAMK2G,CASK,CASQ2,CAV2,CCKBR,CCL16,CCL…			GO: Biological Process
GO: Biological Process	GO:0006886	intracellular protein transport	10	ACD,ACSM6,ADPRH,AFG3L2,AGT,AGTR2,AHCYL1,AIP,AKAP1,AKAP12,AKAP6,AKR1C3,AKT1,AKT2,ANK1,AP1B1,AP1M1,AP1S2,AP2A2,AP2B1,AP2M1,AP2S1,AP3M1,AP3M2,AP4B1,AP4E1,AP4M1,APBA1,APC2,APPBP2,ARFRP1,ASPH,ASPSCR1,ATG13,ATG3,ATG4D,ATP13A2,ATP1B1,ATP2C2,AUP1,AXIN1,BAMBI,BAP1,BBS1,BCAS3,BECN1,BID,BMP4,BMP6,BMP7,BRSK2,BSG,C16orf70,CACNB1,CALR,CAMK4,CCDC22,CCL13,CCL19,CD27,CD36,CDC37,CDC42,CDK1,CDK5,CDKL2,CDKN2A,CEACAM…			GO: Biological Process	GO:0050801	ion homeostasis	5.51775	ABCB6,ABCB7,ABCG2,ABL1,ACO1,ADCYAP1R1,ADRA1B,ADRA1D,ALAS2,ALOX12,ANK1,ANXA7,APOE,APP,ASPH,ATOX1,ATP12A,ATP13A1,ATP13A2,ATP13A3,ATP1A1,ATP1B1,ATP1B2,ATP2A1,ATP2A3,ATP2B2,ATP2B3,ATP2B4,ATP2C2,ATP4A,ATP4B,ATP5F1B,ATP6AP1,ATP6V0A2,ATP6V0A4,ATP6V0C,ATP6V0D1,ATP6V0E1,ATP6V1B1,ATP6V1C1,ATP6V1E1,ATP6V1F,ATP6V1G3,AVPR1B,AVPR2,BCAP31,BCL2,BDH2,BDKRB2,BMP6,C1QTNF1,C7,CA14,CA4,CA7,CACNA1A,CACNA1F,CACNA1I,CAC…			GO: Biological Process	GO:0070838	divalent metal ion transport	10	ACE,ADORA2A,ADRA1A,AGT,AHNAK,AKAP5,ANXA5,AQP2,ASIC1,ASPH,ATG5,ATP1A2,ATP1B1,ATP2A1,ATP2A2,ATP2A3,ATP2B1,ATP2B2,ATP2B3,ATP2C2,BDKRB1,BSPRY,CACNA1A,CACNA1D,CACNA1E,CACNA1F,CACNA1G,CACNA1H,CACNA1I,CACNA1S,CACNA2D1,CACNA2D2,CACNA2D4,CACNB1,CACNB3,CACNG1,CACNG3,CACNG4,CACNG6,CACNG7,CALM1,CALM3,CAMK2A,CAMK2B,CAMK2G,CAPN3,CASK,CASR,CATSPER3,CBARP,CCL19,CCL2,CCL21,CCL3,CCR1,CD4,CD84,CDK5,CEMIP,CHRNB2,CLE…			GO: Biological Process	GO:0098916	anterograde trans-synaptic signaling	10	ABAT,ADGRL1,ADIPOQ,ADNP,ADORA1,AGT,AKAP9,AKT1,ALS2,AMPH,ANAPC2,APBA1,APBA2,ARF1,ASIC1,ATAD1,BAIAP3,BCAN,BDNF,BRAF,CA7,CACNA1B,CACNA1C,CACNA1E,CACNA1G,CACNA2D2,CACNB1,CACNB2,CACNB3,CACNG3,CACNG4,CADPS,CADPS2,CAMK2A,CAMK4,CASK,CCL13,CD38,CEL,CELF4,CHRM2,CHRNA1,CHRNA2,CHRNA3,CHRNA4,CHRNA6,CHRNA7,CHRNB1,CHRNB2,CHRNB3,CHRNB4,CHRND,CHRNE,CHRNG,CLSTN1,CLSTN2,CNIH2,CNIH3,CNP,CNR1,CNR2,CNTN2,CNTNAP4,CPLX2…			GO: Biological Process	GO:0048285	organelle fission	10	ACOT8,AKAP8,ANAPC10,ANAPC13,ANAPC15,ANAPC4,ANAPC7,APC,ARHGEF2,ARL8A,AURKA,AURKB,AURKC,BABAM1,BECN1,BIRC2,BIRC3,BIRC5,BRSK2,BTC,BUB1B,CAV2,CCDC155,CCNA2,CCNB1,CCNB2,CCNF,CDC14A,CDC20,CDC23,CDC25C,CDC27,CDC6,CDCA3,CDCA5,CDK3,CEP164,CEP55,CEP57,CEP57L1,CEP63,CETN3,CHEK1,CHEK2,CHMP2A,CHMP5,CIT,CKS2,COX10,CSNK1A1,CSNK2A1,CSNK2A2,CUL9,DCLRE1A,DDX4,DHODH,DLGAP5,DNM1L,DRD3,DSN1,DYNC1LI1,EDN1,ERCC6L,EREG,…			GO: Biological Process	GO:0014070	response to organic cyclic compound	10	AANAT,ABAT,ABCA3,ABL1,ACACA,ACADS,ACAT1,ACP5,ACSL1,ADAM9,ADAMTS1,ADAR,ADCY1,ADCY6,ADCYAP1R1,AGL,AGTR1,AIFM1,AKAP13,AKAP6,AKAP9,AKT2,ALDH1A2,ALPL,ANGPT2,ANXA3,ANXA7,AOC1,APEX1,APLP1,AQP1,AQP3,AQP8,ARNT2,ARRB2,ARSA,ARSB,ASCL1,ATF1,ATP1A1,ATP2B4,AVPR1A,AXIN2,BAD,BCAS3,BECN1,BGLAP,BIRC2,BMP6,BMP7,BRAF,BTG2,BTRC,BUD31,C3,CA9,CACNA1B,CAD,CALCOCO1,CALCR,CALM2,CALM3,CALR,CARM1,CASP9,CATSPER3,CATSPERD,CAT…			GO: Biological Process	GO:0033993	response to lipid	10	AACS,ABCA1,ABCC2,ABCG1,ABCG2,ACACA,ACADS,ACP5,ACR,ACSBG1,ACVR1,ADAM17,ADAMTS1,ADCY1,ADCYAP1R1,ADD1,ADIPOQ,ADRA1B,AGTR2,AGXT,AIFM1,AKAP8,AKR1C2,ALDH1A2,ALDOB,ALOX12,ALPL,ANXA3,APOA2,APOB,APOH,AQP3,AR,ARG1,ARNT2,ARSA,ARSB,ASS1,ATP4B,BCAS3,BCHE,BCR,BDKRB1,BGLAP,BMP4,BMP7,BRCA2,BRINP2,BUD31,CALCOCO1,CALCR,CALM3,CASP8,CAT,CATSPER3,CATSPERD,CCDC62,CCL1,CCL19,CCL2,CCL20,CCL21,CCL3,CCL5,CCNA2,CCR7,CD14,C…			GO: Biological Process
GO: Biological Process	GO:0001101	response to acid chemical	10	AACS,AANAT,ABCA1,ABCB4,ABCC2,ACP5,ACSL1,ADAMTS1,ADCY6,ADD1,ADNP2,AIFM1,AKAP8,AKR1C3,AKT1,ALAD,ALDH1A2,ALDOB,AQP1,AQP3,ASCL1,ASS1,AVPR1A,BAD,BCHE,BCL2,BCL2L1,BMP4,BMP6,CCL19,CCL21,CCR7,CD36,CDO1,CFL1,CLK2,COL18A1,COL1A1,COL1A2,COL4A6,COL6A1,CPEB4,CPS1,CREB1,CYP17A1,DGAT2,DHFR,DNAAF2,DNMT1,DNMT3B,DUSP1,E2F1,EDN1,EEF2,ENO1,FABP3,FN1,FOLR2,GATA4,GDAP1,GIPR,GLRA2,GNG2,GNPAT,GNRH1,GSN,GSTP1,HDAC2,HLCS,…			GO: Biological Process	GO:0072359	circulatory system development	5.43752	AAMP,ACACB,ACADM,ACE,ACVRL1,ADAM15,ADAM19,ADAM8,ADAMTS1,ADAP2,ADGRB1,ADGRB2,ADGRB3,ADM2,ADORA2B,ADRA1B,ALDH1A2,ALOX12,AMOT,ANG,ANGPT1,ANGPT2,ANGPT4,ANKRD17,ANKS6,ANTXR1,AP2B1,APOB,APOD,APOE,ARHGAP22,ARHGAP24,ARID1A,ARL13B,ASB4,ATP5F1B,AXIN2,B9D1,BAZ1B,BBS7,BCAS3,BCOR,BMP7,C1GALT1,C3,C5,C6,CACYBP,CALCRL,CASP3,CASP7,CASP8,CAV3,CCDC39,CCDC40,CCL11,CCL2,CCL24,CCM2,CCN2,CCN4,CCN6,CCNB1,CCR3,CD34,CDC42…			GO: Biological Process	GO:0001667	ameboidal-type cell migration	10	ACVR1B,ACVRL1,ADAM8,ADAM9,AGT,AGTR2,AKT1,AMOTL1,ANGPT1,ANGPT2,ANGPT4,ANXA3,APOE,APOH,AQP1,BAG4,BMP10,BMPR2,C1QBP,CAP1,CAPN7,CCBE1,CCR6,CDH13,CER1,CFL1,CIB1,CORO1B,CORO1C,CXCL12,DDR2,DLL4,DMTN,DPP4,EDN1,EDN3,EPB41L4B,EPB41L5,ERBB4,ETS1,EVL,FGF1,FGF10,FGF4,FGF7,FGFR1,FLT4,GATA3,GDF2,GNA12,GPLD1,GREM1,HAS1,HDAC5,HDAC6,HDAC9,HIF1A,HRG,HSPB1,HYAL1,ILK,INSL3,ISL1,ITGA2,ITGA3,ITGAV,ITGB1BP1,ITGB2,ITGB3,…			GO: Biological Process	GO:0009144	purine nucleoside triphosphate metabolic process	10	ADK,AK1,ALDOA,ALDOC,AMPD2,AMPD3,ATP5F1A,ATP5F1B,ATP5F1C,ATP5F1D,ATP5IF1,ATP5MC1,ATP5MC2,ATP5MC3,ATP5MF,ATP5MG,ATP5PB,ATP5PD,ATP5PF,ATP6V0A1,ATP6V0A2,ATP6V1B1,BDNF,COQ7,COQ9,COX15,COX4I1,COX5A,COX5B,COX6B1,COX7B,COX7C,CYC1,CYCS,DMAC2L,DNM1L,ECD,EIF6,ENO1,ENO2,ENO3,ENTPD1,ENTPD5,GADD45GIP1,GALE,GALK1,GALT,GAPDH,GAPDHS,GCK,GPD1,GPHN,GPI,GUK1,HIF1A,HK2,HK3,HSPA8,HTR2A,IGF1,ITPA,KHK,LDHA,LDHC,LDHD,MIF…			GO: Biological Process	GO:0033043	regulation of organelle organization	10	ABI2,ACD,ACSM6,ACTL6A,ACTR3B,ADPRHL1,AKAP8,ALOX15,AMOT,ANAPC10,ANAPC15,ANAPC4,ANKRD23,APC,APOPT1,ARHGAP6,ARHGEF19,ARHGEF2,ARID5A,ARIH2,ARL2,ARPC1A,ARRB2,ASAP3,ATAD2,ATG3,ATP5IF1,AURKA,AURKB,BAD,BAG4,BAIAP2L2,BAP1,BBC3,BCL6,BECN1,BIK,BIRC5,BMP10,BTC,BUB1B,C2CD5,CALCOCO2,CAMK2D,CARMIL1,CAV2,CCNB1,CCNF,CDC14A,CDC20,CDC23,CDC25C,CDC27,CDC42EP1,CDC42EP2,CDC45,CDC6,CDCA5,CDK5R1,CDKN1B,CHEK1,CHMP2A,CHMP…			GO: Biological Process	GO:0010035	response to inorganic substance	10	AANAT,ABAT,ABL1,ACER1,ACO1,ACP5,ADAM9,ADCY1,ADGRV1,AIFM1,ALB,ALG2,ALOX5AP,ANXA11,ANXA7,AOC1,APEX1,APTX,AQP1,AQP3,ASCL1,ATF1,ATIC,ATP13A2,ATP2B4,ATP5F1D,AVPR1A,BAD,BECN1,BGLAP,BMP6,BMP7,BRAF,C3,CACNA1G,CACNA1H,CALM2,CALM3,CALR,CAMK2B,CASP9,CCNA2,CCR7,CCS,CD14,CD36,CD86,CDK1,CDK2,CDK4,CDKN1B,CHRNA3,CLIC4,CNGA3,COL1A1,CP,CPNE2,CPNE6,CPOX,CPS1,CRIP1,CRP,CTNNB1,CUTA,CYBRD1,CYP11B1,CYP11B2,CYP1B1,CYP2A…			GO: Biological Process	GO:0043009	chordate embryonic development	10	ABI1,ACVR1,ACVR1B,ACVRL1,ADAM10,ADD1,ALDH1A2,ALPI,ALX3,ALX4,AMOT,ANKRD11,APAF1,APBA1,APBA2,APBA3,APOB,AR,ARHGAP35,ARNT2,ASCL2,AXIN2,B9D1,BIRC6,BMP2,BMP4,BMP7,BMPR1A,BRCA2,BRK1,BTF3,C5,CASP8,CC2D2A,CCM2,CCNB2,CDH1,CDK11A,CDX2,CDX4,CELSR1,CFL1,CHD8,CHRD,CHST11,CITED1,CITED2,COL2A1,COPS3,CTHRC1,CUBN,DAB2,DACT1,DCHS1,DDX5,DLC1,DLG1,DLK1,DLL3,DLX2,DSCAML1,DUSP3,DVL2,DVL3,E2F7,E2F8,ECE1,EDNRA,EIF4A3,EI…			GO: Biological Process
GO: Biological Process	GO:0015672	monovalent inorganic cation transport	10	ABAT,ABCC1,ABCC8,ACTN4,ADORA2A,AGT,AHCYL1,AKAP6,AKAP9,AKT1,AKT2,AKT3,ANK1,AQP1,ARF1,ARL2,ASIC3,ATP1A2,ATP1B1,ATP1B2,ATP1B3,ATP1B4,ATP4A,ATP4B,ATP5F1A,ATP5F1B,ATP5F1C,ATP5MC3,ATP5MF,ATP5MG,ATP5PF,ATP5PO,ATP6V0A4,ATP6V0B,ATP6V0C,ATP6V0D1,ATP6V0E1,ATP6V1C1,ATP6V1D,ATP6V1F,ATP6V1G3,AZIN2,BTK,CAB39,CACNA1D,CAMK2D,CAV3,CHP1,CHRNA6,CHRNB2,CNGB3,CNNM4,CNTN1,COMMD3,COMMD9,COX10,COX4I1,COX4I2,COX5A,COX5B,C…			GO: Biological Process	GO:0072358	cardiovascular system development	5.43752	AAMP,ACACB,ACADM,ACE,ACVRL1,ADAM15,ADAM19,ADAM8,ADAMTS1,ADAP2,ADGRB1,ADGRB2,ADGRB3,ADM2,ADORA2B,ADRA1B,ALDH1A2,ALOX12,AMOT,ANG,ANGPT1,ANGPT2,ANGPT4,ANKRD17,ANKS6,ANTXR1,AP2B1,APOB,APOD,APOE,ARHGAP22,ARHGAP24,ARID1A,ARL13B,ASB4,ATP5F1B,AXIN2,B9D1,BAZ1B,BBS7,BCAS3,BCOR,BMP7,C1GALT1,C3,C5,C6,CACYBP,CALCRL,CASP3,CASP7,CASP8,CAV3,CCDC39,CCDC40,CCL11,CCL2,CCL24,CCM2,CCN2,CCN4,CCN6,CCNB1,CCR3,CD34,CDC42…			GO: Biological Process	GO:0010959	regulation of metal ion transport	10	ABCC8,ACE,ACTN2,ACTN4,ADORA2A,AGT,AHCYL1,AHNAK,AKAP5,AKAP9,AKT1,AKT2,AKT3,ANK3,AQP2,ARF1,ASPH,ATG5,ATP1A2,ATP1B1,ATP1B2,ATP2B2,ATP2C2,BDKRB1,BPIFA1,CACNA1D,CACNA1G,CACNA2D1,CACNA2D4,CACNB1,CACNB3,CALM1,CALM3,CAMK2A,CAMK2B,CAMK2G,CAPN3,CASK,CASR,CBARP,CCL2,CCL3,CCR1,CD4,CD84,CEMIP,CLEC4C,CLIC2,CNTN1,COMMD1,CORO1A,CRH,CRHR1,CXCL10,CXCL12,CXCL9,CXCR3,DIAPH1,DLG1,DMPK,DNM2,DPP10,DPP6,DRD1,DRD2,DRD4,E…			GO: Biological Process	GO:1902656	calcium ion import into cytosol	10	AKAP6,ASPH,ATP2B4,BAX,BBC3,BDKRB1,CACNA1C,CALM1,CALM2,CAMK2D,CAPN3,CCL19,CCL21,CCL3,CD19,CHERP,CORO1A,CXCL10,CXCL11,CXCL9,CXCR3,CYBA,DBI,DMD,DRD1,DRD2,F2,F2RL3,FCRL5,FKBP1B,GPR39,GSTM2,GSTO1,HAP1,HRC,HTR2A,HTR2C,IL13,ITGAV,ITGB3,ITPR1,ITPR2,LHCGR,LYN,MCOLN1,MS4A2,MYO5A,NGF,NOS1,NTSR1,PDE4D,PKD2,PLCG1,PLCG2,PRKACA,PRKCE,PTK2B,PTPN6,RYR1,SLC8A1,TEX101,TGFB1,TGFB2,THY1,TPCN1,TPCN2,TRPC1,TRPM2,XCL1,X…			GO: Biological Process	GO:0000278	mitotic cell cycle	10	AAAS,AATF,AKAP8,ANAPC10,ANAPC13,ANAPC15,ANAPC4,ANAPC7,APC,ARHGEF2,ARL8A,ASCL1,ATF2,AURKA,AURKB,AURKC,BABAM1,BACH1,BECN1,BIRC2,BIRC3,BIRC5,BLM,BRINP1,BRINP3,BRSK2,BTC,BTRC,BUB1B,CALM2,CAMK2D,CARM1,CAV2,CCNA2,CCNB1,CCNB2,CCNF,CDC123,CDC14A,CDC20,CDC23,CDC25C,CDC27,CDC34,CDC45,CDC6,CDC7,CDCA3,CDCA5,CDK10,CDK14,CDK3,CDK4,CDK5RAP3,CDKN1B,CDKN2B,CDKN3,CENPA,CEP164,CEP41,CEP55,CEP57,CEP57L1,CEP63,CEP70,…			GO: Biological Process	GO:0031667	response to nutrient levels	10	ABCG8,ACADS,ACAT1,ACP5,ACSL1,ACTL6A,ACVR1C,ADAMTS1,ADIPOR2,ADRB3,ADSSL1,AGL,AIFM1,AKT2,ALB,ALDH1A2,ALOX5,ALPL,AMBRA1,AOC1,APOE,AQP3,ARSA,ARSB,ASCL1,ATF3,ATG5,ATP13A2,ATP6V0A1,ATP6V0C,ATP6V0E1,ATP6V1A,ATP6V1B1,ATP6V1B2,ATP6V1C2,ATP6V1G1,BBS4,BCAS3,BECN1,BGLAP,BMP7,BMPR2,BRIP1,CAD,CALCOCO2,CAPNS1,CBS,CCK,CCL2,CD3E,CD4,CDKN2B,CHMP4A,CLEC16A,CLN3,CLPS,CNR1,COL1A1,CP,CPS1,CSNK2A2,CTSK,CTTN,CUBN,CYBA,C…			GO: Biological Process	GO:0048732	gland development	10	AACS,ACAT1,ADRM1,AK2,AK4,AKT2,ALDH1A2,ALDOB,APLN,AR,ARF6,ARG1,ARHGAP5,ASL,ASS1,ATG7,ATP2C2,B4GALT1,BAAT,BMP2,BMP4,BMP7,BMPR1A,BRCA2,CADM1,CBX7,CCDC39,CCDC40,CCKBR,CCL11,CCNB2,CDC42,CDH1,CDKN1B,CDKN2A,CDO1,CGA,CHUK,CITED2,CPS1,CRHR1,CRIP1,CRKL,CSF1,CSN2,CTC1,CYP17A1,CYP19A1,CYP7B1,DAG1,DBP,DKK3,DUOX2,E2F7,E2F8,EDA,EDAR,EDARADD,EGF,EPHA2,EPHB3,ERBB4,ETV4,FA2H,FGA,FGF10,FGF3,FGF7,FGF8,FGFR2,FOXA1,FO…			GO: Biological Process
GO: Biological Process	GO:0006913	nucleocytoplasmic transport	10	AAAS,AGFG1,AGT,AGTR2,AHCYL1,AKAP1,AKAP13,AKAP6,AKR1C3,AKT1,ALKBH5,APC2,AXIN1,BAMBI,BMP4,BMP6,BMP7,CALR,CAMK4,CASC3,CCDC22,CCL19,CD27,CD36,CDK1,CDK5,CDKN2A,CEACAM1,CEP57,CFL1,CHP1,CHTOP,CPSF2,CPSF3,CREB3,CSF3,CTNNB1,CYLD,DAB2IP,DACT1,DACT3,DAG1,DDX19A,DDX19B,DDX20,DDX25,DDX39A,DMAP1,DUSP16,DYRK2,ECT2,EDA,EGR2,EIF4A3,EIF4E,EIF5A,ENY2,F2R,FAF1,FAM89B,FGF9,FIP1L1,FYB1,FYTTD1,GCKR,GDF5,GEMIN2,GEMIN6,G…			GO: Biological Process	GO:0023057	negative regulation of signaling	5.43583	ABHD6,ABL1,ACE2,ACHE,ADAMTSL2,ADNP,ADRA1B,ADRB3,AES,AHSG,AJUBA,AKT1S1,AMBP,ANKRD6,ANXA5,AP2A1,AP2A2,AP2B1,APCDD1,APOD,APOE,ARAP3,ARHGAP24,ARHGEF2,ARHGEF7,ARNTL,ARRB2,ASH1L,ASPN,ATAD1,ATP2B4,ATXN7,AXIN2,BAG5,BANK1,BARX1,BCHE,BCL2,BCL6,BCL9L,BDKRB2,BFAR,BGN,BIRC6,BMF,BMP7,BRAF,BRAP,C3orf33,CALM1,CALM2,CARD19,CARD8,CASP8,CASQ2,CAV2,CAV3,CAVIN3,CBL,CBLB,CBLC,CCDC22,CCND1,CD109,CD14,CD27,CD38,CD44,CD7…			GO: Biological Process	GO:0034220	ion transmembrane transport	10	ABCA1,ABCB11,ABCC11,ABCC2,ABCC6,ABCC8,ACACA,ACE,ACSL6,ACTN2,ACTN4,ADAMTS8,AGT,AHCYL1,AHNAK,AKAP9,AKT1,AKT2,ANK3,ANKH,ANO3,ANXA5,APOL1,AQP1,AQP2,AQP3,AQP4,AQP5,AQP6,AQP8,ARF1,ARHGEF9,ASIC1,ASIC2,ASIC3,ASIC5,ASPH,ATG5,ATP10A,ATP10D,ATP11B,ATP1A2,ATP1B1,ATP1B2,ATP2A1,ATP2A2,ATP2A3,ATP2B1,ATP2B2,ATP2B3,ATP2C2,ATP4B,ATP5F1B,ATP5MC1,ATP5MF,ATP5PB,ATP5PD,ATP5PF,ATP5PO,ATP6V0A4,ATP6V0D1,ATP6V0D2,ATP6V0E1…			GO: Biological Process	GO:0043603	cellular amide metabolic process	10	AANAT,AARS,AASDHPPT,ABCA7,ACACA,ACACB,ACE,ACE2,ACO1,ADAD1,ADAR,AEBP1,AGK,AGO2,AGO4,AGT,AKT1,ALDH1L1,ALDH5A1,ANPEP,APEH,APLP1,ARG1,ASAH1,ASAH2,ASL,ASNS,ASS1,ATIC,ATP5IF1,ATP6AP2,B4GALNT1,BANK1,BCL3,BDH2,BOLL,C1QBP,CALR,CAPRIN1,CAPRIN2,CARNS1,CARS,CASC3,CCL5,CD28,CDC123,CDK5RAP1,CDKAL1,CEL,CELF1,CELF4,CERS1,CERS4,CHAC1,CHCHD1,CIRBP,CLIC3,CLIC4,CLIC5,CLIC6,CLN3,CLN8,CMA1,CNDP2,CNOT1,CNOT3,CNOT7,COA1…			GO: Biological Process	GO:1903047	mitotic cell cycle process	10	AAAS,AKAP8,ANAPC10,ANAPC13,ANAPC15,ANAPC4,ANAPC7,APC,ARHGEF2,ARL8A,ATF2,AURKA,AURKB,AURKC,BABAM1,BACH1,BECN1,BIRC2,BIRC3,BIRC5,BLM,BRSK2,BTC,BTRC,BUB1B,CALM2,CAMK2D,CARM1,CAV2,CCNA2,CCNB1,CCNB2,CCNF,CDC14A,CDC20,CDC23,CDC25C,CDC27,CDC34,CDC45,CDC6,CDC7,CDCA3,CDCA5,CDK10,CDK14,CDK3,CDK4,CDK5RAP3,CDKN1B,CDKN2B,CDKN3,CENPA,CEP164,CEP41,CEP55,CEP57,CEP57L1,CEP63,CEP70,CETN3,CHEK1,CHEK2,CHMP2A,CHMP5,C…			GO: Biological Process	GO:0043436	oxoacid metabolic process	10	AADAT,AARS,AASS,ABAT,ABCB11,ABCC1,ABCD1,ABCD2,ABHD12,ABHD14B,ACAA2,ACACA,ACAD10,ACADL,ACADS,ACADVL,ACAN,ACAT1,ACO1,ACO2,ACOT11,ACOT2,ACOT8,ACSBG2,ACSL1,ACSL5,ACSM1,ACSM2B,ACSM3,ACSS1,ACSS2,ACY1,ADHFE1,ADI1,ADIPOR2,ADPGK,ADSSL1,AGMAT,AGXT2,AHCYL2,AKR1A1,AKR1D1,AKT2,ALDH18A1,ALDH1A1,ALDH1A2,ALDH1A3,ALDH4A1,ALDH9A1,ALDOC,ALOX12B,ALOX15B,ALOX5,ALOX5AP,ALOXE3,AMACR,AMDHD1,AMDHD2,ANGPT1,APOA5,ARSB,ART4…			GO: Biological Process	GO:0043436	oxoacid metabolic process	10	AACS,AADAT,AASS,ABAT,ABCC1,ABCD1,ABCD2,ABCD3,ABHD14B,ABHD5,ACAA1,ACAA2,ACACA,ACAD10,ACAD8,ACADL,ACADS,ACADVL,ACAN,ACAT1,ACO2,ACOT11,ACOT4,ACOT7,ACOT8,ACOX3,ACSBG1,ACSL3,ACSL6,ACSM1,ACSM6,ACY1,ADH7,ADI1,ADIPOQ,ADIPOR2,ADPGK,ADSS,ADSSL1,AFMID,AGXT,AGXT2,AHCY,AKR1A1,AKR1C2,AKR1D1,AKT2,ALDH1A1,ALDH1A2,ALDH1L1,ALDH4A1,ALDH6A1,ALDH7A1,ALDOA,ALDOB,ALKBH7,ALOX12,ALOX15,ALOXE3,AMDHD1,AMDHD2,APIP,APOA2,APO…			GO: Biological Process
GO: Biological Process	GO:2000060	positive regulation of ubiquitin-dependent protein catabolic process	10	ANAPC10,ANAPC15,ANAPC16,ANAPC2,ANAPC7,AXIN1,BTRC,BUB1B,BUB3,CAV3,CCDC22,CDC16,CDC26,CDC27,CDK1,CDK5RAP3,CUL1,FBXO5,FZR1,PLK1,PSMA1,PSMA2,PSMA4,PSMA5,PSMA6,PSMA7,PSMB1,PSMB10,PSMB2,PSMB3,PSMB5,PSMB6,PSMB7,PSMC2,PSMC3,PSMC4,PSMD11,PSMD13,PSMD14,PSMD3,PSMD7,PSMD9,PSME1,PSME2,PSME4,PSMF1,PTEN,PTK2,PTK2B,SKP1,SMURF1,UBA52,UBC,UBE2D1,UBE2E1			GO: Biological Process	GO:0061061	muscle structure development	5.42403	ABL1,ACADM,ACHE,ACTG1,ADAM12,ADGRB3,AEBP1,AFG3L2,ALX4,ANGPT1,ANKRD17,ANKRD23,ARID1A,ARNTL,ASB2,BARX2,BCL2,BCL9L,BHLHE41,BIN1,BOC,CACNA1H,CACNA1S,CACYBP,CAMK1,CAPZB,CASP1,CASQ2,CAV2,CAV3,CCL17,CCN4,CCNB1,CCNT2,CD53,CDC42,CDH15,CDK1,CDK5,CEACAM5,CENPF,CFLAR,CHRNA1,CHRNB1,CHRND,CMTM5,CNTF,CNTFR,COL11A1,COL14A1,CREB1,CRYAB,CSF1R,CSRP2,CTDP1,CTF1,CTH,CTNNA1,CTNNB1,CTSB,CXCL10,CXCL12,CXCL14,CXCL9,CYP26…			GO: Biological Process	GO:0023014	signal transduction by protein phosphorylation	10	ABCA7,ACE2,ACTN2,ACVR1B,ACVRL1,ADAM8,ADAM9,ADIPOQ,ADRA1A,ADRA1B,ADRB3,AGT,AJUBA,AKAP9,AKT1,ALOX12B,ALOX15,AMBP,ANGPT1,ANKRD26,APC,APIP,APOE,ASH1L,ATP6AP2,AVPI1,BMP1,BMP10,BMP7,BMP8B,BMPR1B,BMPR2,BNIP2,BTC,C1QTNF1,C1QTNF3,C3,C5,CALM1,CALM3,CAMK2A,CAMK2B,CAMK2G,CAMKK2,CARD9,CASR,CCL1,CCL11,CCL16,CCL18,CCL19,CCL2,CCL21,CCL23,CCL25,CCL26,CCL3,CCM2,CCR1,CD36,CD40,CD44,CD74,CD81,CD84,CDC42EP5,CDC42SE1,…			GO: Biological Process	GO:0010243	response to organonitrogen compound	10	AACS,AANAT,AARS,ABAT,ABCC2,ADCY4,ADCY7,ADCY8,ADGRL3,ADIPOQ,ADRA1B,ADRM1,ADSS,AGT,AGTR1,AGXT,AHCYL1,AHSG,AIFM1,AKAP1,AKAP6,AKAP7,AKAP9,AKT1,AKT3,ALAD,ALDH3A1,ANKRD26,ANXA1,AOC1,AP3S1,APLP1,APPL1,APRT,AQP1,AQP8,AQP9,ARG1,ARHGEF2,ASCL1,ASNS,ASPH,ASS1,ATP2A1,ATP2B4,ATP4B,ATP6AP1,ATP6V0A1,ATP6V0A2,ATP6V0C,ATP6V0D1,ATP6V1B1,ATP6V1D,ATP6V1G3,AVPR1A,AVPR1B,AVPR2,BAIAP2L1,BAIAP2L2,BAX,BCL2L1,BIRC2,BLM,BMP…			GO: Biological Process	GO:0000819	sister chromatid segregation	5.6112	AKAP8,ANAPC10,ANAPC15,ANAPC4,APC,AURKB,AURKC,BECN1,BIRC5,BUB1B,CCNB1,CDC14A,CDC20,CDC23,CDC27,CDC6,CDCA5,CENPA,CENPQ,CENPU,CEP55,CEP57,CEP57L1,CHMP2A,CHMP5,CIT,CSNK2A1,CSNK2A2,CTCF,CTNNB1,DLGAP5,DSN1,DYNC1LI1,ERCC6L,ESPL1,HDAC8,INCENP,KATNB1,KIF14,KIF2A,KNSTRN,KPNB1,LCMT1,MAD2L1,MAPRE1,MCMBP,MRE11,NCAPG,NCAPH,NDC80,NDE1,NDEL1,NIPBL,NUF2,NUP85,NUP98,PDCD6IP,PLK1,RACGAP1,RANGAP1,REC8,SGO2,SMC1A,SMC…			GO: Biological Process	GO:0060341	regulation of cellular localization	10	AAAS,ABAT,ABL1,ABLIM3,ACAA2,ACHE,ACTL6A,ACVR1C,ACVR2A,ADAM9,ADCYAP1R1,AGTR1,AHI1,AKAP6,AKT2,ALOX15B,ANG,ANGPT1,AP1G1,AP2M1,APOD,ARHGEF7,ARIH2,ARL2,ARRB1,ASIC1,ASTN2,ATG5,ATP13A2,ATP2A2,ATP5IF1,ATP6AP1,AVPR1A,AXIN2,BAD,BANK1,BAP1,BCAS3,BCL3,BCR,BECN1,BGLAP,BMF,BMP6,BMP7,BRAF,BST2,BVES,C12orf4,C1QTNF1,C5,CABP1,CACNA1A,CACNA1B,CACNA1G,CACNA1H,CACNA1I,CADM1,CALCA,CALM2,CALM3,CAMK1,CAMK2A,CAV3,CBARP,C…			GO: Biological Process	GO:0048568	embryonic organ development	10	ACVR1,ALDH1A1,ALDH1A2,ALX3,ALX4,ASCL2,BCR,BIRC6,BMP2,BMP4,BMP7,BMPR1A,CASP8,CC2D2A,CCDC39,CCDC40,CDX2,CDX4,CELSR1,CHRNA10,CHST11,CITED1,CITED2,CLRN1,COL2A1,CRYAA,CTHRC1,DLG1,DLX2,DLX5,DSCAML1,DVL2,DVL3,E2F7,E2F8,EFNA1,EIF4A3,EN1,ENG,EOMES,EPAS1,EPHA2,EPN2,ERCC1,ERCC3,ERF,ESX1,EYA1,FBN1,FBXW8,FGF10,FGF3,FGF8,FGF9,FGFR2,FLT3LG,FLVCR1,FOXH1,FRS2,FRZB,FUZ,FZD3,GAB1,GAMT,GATA1,GATA3,GBX2,GFI1,GJA5,GJB…			GO: Biological Process
GO: Biological Process	GO:0055086	nucleobase-containing small molecule metabolic process	10	ABCA1,ADCY1,ADCY2,ADCY3,ADCY4,ADCY6,ADCY8,ADCY9,ADCYAP1R1,ADGRD1,ADK,ADNP,ADORA2A,ADORA2B,ADSS,ADSSL1,AFMID,AHCYL1,AHCYL2,AICDA,AIPL1,AK1,AK2,AK8,AKAP12,AKAP6,ALDOA,ALDOB,AMPD1,AMPD2,AMPD3,APLP1,APOBEC1,APOBEC2,APOBEC3G,APOE,AQP1,ATIC,ATP1A2,ATP1B1,ATP2B2,ATP5F1A,ATP5F1B,ATP5F1C,ATP5MC3,ATP5MF,ATP5MG,ATP5PF,ATP5PO,ATP6V0A4,ATP7A,BAD,BHMT,CALCR,CALCRL,CALM3,CDA,CMPK1,CNGB3,CNP,COASY,COQ7,COQ9,COX1…			GO: Biological Process	GO:0044092	negative regulation of molecular function	5.41703	A2M,A2ML1,ABCA7,ABCE1,ABL1,ACACB,ACE,ADAM15,ADARB1,ADNP,ADRB3,AES,AHSG,AIP,AJUBA,AKT1S1,AMBP,AMOT,ANAPC10,ANAPC15,ANAPC2,ANAPC4,ANAPC5,ANAPC7,ANXA1,ANXA4,ANXA5,APBA3,APOA2,APOC2,APOE,APP,ARFGEF1,ARFGEF3,ARL2,ARPP19,ARRB2,ASPN,ATP2B4,AURKA,BAG4,BAG5,BCAS3,BGN,BIRC5,BIRC6,BIRC7,BMP7,BRMS1,BST2,BTAF1,BUB3,C3,C5,CAB39,CABIN1,CABP1,CALM1,CALM2,CAMK1,CAMK2N2,CARM1,CASP3,CASP8,CASQ2,CAV3,CBARP,CBLC,CCNB…			GO: Biological Process	GO:0030003	cellular cation homeostasis	10	ABCB6,ABCB7,ADM,ADRA1A,ADRA1B,ADRA1D,AGT,AGTR1,AGTR2,AKAP5,ANXA7,APOE,APP,ARF1,ASPH,ATG5,ATP1A2,ATP1B1,ATP1B2,ATP2A1,ATP2A2,ATP2A3,ATP2B1,ATP2B2,ATP2B3,ATP2C2,ATP5F1B,ATP6V0A4,ATP6V0D1,ATP6V0D2,ATP6V0E1,ATP6V1F,ATP6V1H,BCAP31,BDKRB1,BDKRB2,C1QTNF1,C3AR1,C7,CA7,CACNA1A,CACNA1F,CACNA1G,CACNA1I,CACNA2D1,CACNB3,CALB1,CALCR,CALM1,CALM3,CALR,CAPN3,CASR,CCL1,CCL11,CCL19,CCL2,CCL21,CCL23,CCL28,CCL3,CCR1,…			GO: Biological Process	GO:0051960	regulation of nervous system development	10	ACE,ACSL6,ACTR3,ADGRB3,ADGRE5,ADGRG1,ADGRL1,ADGRL3,ADNP,AKT1,ANAPC2,APBB1,ARF1,ARF6,ARHGEF2,ARSB,ASAP1,ASCL1,ASPA,ASPM,AVIL,BCL11A,BCL11B,BDNF,BIN1,BMP4,BMP7,BMPR2,BNIP2,BRAF,CALR,CAMK1D,CAPRIN1,CAPRIN2,CARM1,CASZ1,CCDC88A,CCL5,CDH2,CDH4,CDK1,CDK5RAP1,CDK5RAP2,CDK5RAP3,CDKL3,CDKL5,CDON,CFL1,CHODL,CHRD,CHRNA3,CHRNB2,CIT,CLCF1,CLSTN1,CLSTN2,CNR1,CNTF,CNTN2,COL3A1,CPNE6,CREB1,CRMP1,CRX,CSF1,CSHL1,CS…			GO: Biological Process	GO:0051276	chromosome organization	5.51707	ABRAXAS1,ACD,ACTL6A,ACTL6B,AIFM1,AKAP8,ANAPC10,ANAPC15,ANAPC4,APC,ARID4A,ARID5A,ASCC3,ATAD2,ATF2,ATXN3,ATXN7,ATXN7L3,AURKA,AURKB,AURKC,BABAM1,BAHD1,BANP,BAP1,BAZ1B,BAZ2A,BCL6,BECN1,BIRC5,BLM,BRMS1L,BRPF1,BUB1B,CAMK2D,CARM1,CBX2,CBX3,CBX8,CCDC155,CCNB1,CD19,CDC14A,CDC20,CDC23,CDC27,CDC45,CDC6,CDCA5,CDYL,CENPA,CENPQ,CENPU,CEP55,CEP57,CEP57L1,CEP63,CHD1L,CHD7,CHD9,CHEK1,CHMP2A,CHMP5,CHTOP,CIT,CLOCK,…			GO: Biological Process	GO:0009991	response to extracellular stimulus	10	ABCG8,ACADS,ACAT1,ACP5,ACSL1,ACTL6A,ACVR1C,ADAMTS1,ADIPOR2,ADRB3,ADSSL1,AGL,AIFM1,AKT2,ALB,ALDH1A2,ALOX5,ALPL,AMBRA1,AOC1,APOE,AQP3,ARSA,ARSB,ASCL1,ATF3,ATG5,ATP13A2,ATP6V0A1,ATP6V0C,ATP6V0E1,ATP6V1A,ATP6V1B1,ATP6V1B2,ATP6V1C2,ATP6V1G1,AVPR1A,BBS4,BCAS3,BECN1,BGLAP,BMP6,BMP7,BMPR2,BRIP1,CAD,CALCOCO2,CAPNS1,CBS,CCK,CCL2,CD3E,CD4,CDKN2B,CHMP4A,CLEC16A,CLN3,CLPS,CNR1,COL1A1,CP,CPS1,CSNK2A2,CTSK,CTTN…			GO: Biological Process	GO:0048666	neuron development	5.98567	ABI1,ABLIM1,ACHE,ACSL6,ACTB,ADAMTS1,ADCY1,ADGRB1,AKAP5,ALCAM,ALG10,ALK,ANAPC2,ANK3,ANKRD27,APBB1,APBB2,APOD,APOE,ARF1,ARF4,ARF6,ARFGEF1,ARHGAP35,ARSB,ARX,ATCAY,ATF5,ATG7,ATL1,ATXN2,BAIAP2,BCL11A,BMP4,BMP5,BMP7,BMPR1B,BOC,BRSK1,BRSK2,C1QL1,CABP4,CACNA1A,CACNA1F,CAMK1,CAMK2A,CAMK2B,CAMSAP1,CAPZB,CBFA2T2,CCK,CDH1,CDH11,CDH4,CDK5,CDK5R1,CDKL3,CDKL5,CFL1,CHL1,CHN1,CHRNA3,CHRNB2,CLMN,CLRN1,CNGA3,CNP,CN…			GO: Biological Process
GO: Biological Process	GO:1901135	carbohydrate derivative metabolic process	10	A4GNT,AATF,ABCA1,ABCC5,ABHD10,ACAN,ACOT8,ADAMTS13,ADAMTS5,ADAMTSL1,ADCY1,ADCY2,ADCY3,ADCY4,ADCY6,ADCY8,ADCY9,ADCYAP1R1,ADGRD1,ADK,ADNP,ADORA2A,ADORA2B,ADSS,ADSSL1,AHCYL1,AHCYL2,AICDA,AIPL1,AK1,AK2,AKAP12,AKAP6,AKR1A1,AKR1B10,AKR1C3,AKR7A2,AKT1,ALDH1A1,ALDOA,ALDOB,ALG1,ALG12,ALG13,ALG14,ALG3,ALG5,ALG6,AMPD1,AMPD2,AMPD3,APLP1,APOBEC1,APOBEC2,APOBEC3G,APOE,AQP1,ARSA,ARSB,ARSD,ARSE,ARSF,ARSJ,ART1,ART…			Pathway	868086	Rap1 signaling pathway	10	ACTB,ACTG1,ADCY2,ADCY3,ADCY8,ADCY9,ADORA2B,AFDN,ANGPT1,ANGPT2,ANGPT4,ARAP3,BCAR1,BRAF,CALM1,CALM2,CALML4,CALML6,CDC42,CNR1,CRKL,CSF1,CSF1R,CTNNB1,DOCK4,DRD2,EFNA1,EFNA3,EFNA4,EFNA5,EGF,EPHA2,F2RL3,FGF10,FGF14,FGF22,FGF23,FGF4,FGF7,FGF8,FGFR1,FGFR2,FGFR4,FLT1,FLT4,FPR1,FYB1,GNAI1,GNAI2,GNAI3,GNAQ,GNAS,GRIN1,GRIN2A,HRAS,INSR,ITGAL,ITGAM,ITGB1,ITGB2,ITGB3,KRAS,LAT,LPAR1,LPAR2,LPAR4,LPAR5,MAGI1,MAGI2…			GO: Biological Process	GO:0030335	positive regulation of cell migration	10	ACTN4,ACVR1B,ADAM10,ADAM8,ADAM9,AGT,AKT1,AKT2,AMOTL1,ANGPT1,ANGPT4,ANXA3,APC,AQP1,ARHGAP5,ATP8A1,BAG4,BDKRB1,BMPR2,C1QBP,C3AR1,CALR,CAMK1D,CAPN7,CARMIL1,CBLL1,CCBE1,CCL11,CCL19,CCL2,CCL21,CCL26,CCL3,CCR1,CCR6,CD274,CD74,CDH13,CEMIP,CIB1,COL1A1,CORO1A,CPNE3,CSF1,CSF1R,CXCL1,CXCL10,CXCL12,CXCL14,CXCL3,CXCL9,CXCR2,DDR2,DIAPH1,DMTN,DOCK4,DRD1,EDN1,EDN3,EDNRA,EGFR,ELANE,ELP1,EPB41L4B,EPB41L5,EPHA1,ERB…			GO: Biological Process	GO:0001816	cytokine production	10	ABCA1,ACE2,ACP5,ADAM33,ADAM8,ADAMTS3,ADGRG1,ADIPOQ,ADORA2B,AGPAT2,AGT,AGTR1,AKIRIN2,ANXA1,APOA2,APOD,AQP4,ARHGEF2,ARRB1,ASB1,ASH1L,ATP6AP2,AVPR2,AXL,AZU1,BANK1,BATF,BCL10,BCL3,BIRC2,BTN1A1,BTN3A1,BTN3A2,C1QBP,C1QTNF3,C5orf30,CADM1,CALCA,CAMK4,CAMP,CARD8,CASP1,CCL13,CCL19,CCL20,CCL3,CCL4,CCL5,CCM2L,CD14,CD2,CD226,CD244,CD27,CD274,CD28,CD34,CD3E,CD40,CD55,CD6,CD84,CD86,CD96,CEBPE,CEBPG,CHI3L1,CHIA,…			GO: Biological Process	GO:0022402	cell cycle process	5.5145	AAAS,ABRAXAS1,AKAP8,ANAPC10,ANAPC13,ANAPC15,ANAPC4,ANAPC7,APC,ARHGEF2,ARL3,ARL8A,ATF2,ATRIP,AUNIP,AURKA,AURKB,AURKC,BABAM1,BACH1,BARD1,BECN1,BIRC2,BIRC3,BIRC5,BLM,BRINP1,BRINP3,BRSK2,BTC,BTRC,BUB1B,CAB39,CALM2,CAMK2D,CAPN3,CARM1,CAV2,CCDC155,CCNA2,CCNB1,CCNB2,CCNF,CDC123,CDC14A,CDC14B,CDC20,CDC23,CDC25C,CDC27,CDC34,CDC45,CDC6,CDC7,CDCA3,CDCA5,CDK10,CDK14,CDK3,CDK4,CDK5R1,CDK5RAP3,CDKN1B,CDKN2B,CD…			GO: Biological Process	GO:0001101	response to acid chemical	5.99764	AANAT,AARS,ACACA,ACP5,ACSL1,ADAMTS1,ADCY6,AIFM1,AKAP8,ALDH1A2,AQP1,AQP3,ASCL1,ATP2B4,AVPR1A,BAD,BMP6,BRINP2,CBS,CCL2,CCR7,CD36,CD38,CDKN1B,CDO1,CFL1,COL16A1,COL1A1,COL1A2,COL4A1,COL4A6,COL6A1,CPS1,CPT1A,CYBA,CYP17A1,DGAT2,DNAAF2,DNMT1,DNMT3A,DNMT3B,DRD1,EEF2,EGFR,EPHA3,FABP3,FGFR4,FN1,FOLR2,GIP,GLRA1,GNAS,GNB1,GNG2,GNPAT,GPRC6A,GRIN2A,GSK3B,GSN,GSS,GSTP1,HIF1A,HLCS,HMGCL,HMGCS2,HSD17B2,ICAM1,IGF1…			GO: Biological Process	GO:0002088	lens development in camera-type eye	5.98305	BCAR3,BFSP1,BFSP2,BMP4,CDK2,CDK4,CITED2,CRYAA,CRYAB,CRYBA1,CRYBA2,CRYGA,CRYGD,CTNS,DLG1,EPHA2,FGFR2,FGFR3,FRS2,FZR1,GATA3,GJA8,HIPK2,KDM5B,MAF,MED1,MEIS1,MIP,NECTIN1,NECTIN3,NF2,PAX6,PITX3,POU2F1,PYGO2,SHROOM2,SIX3,SIX5,SKI,SLC7A11,SMAD3,SMARCA4,TBC1D20,TFAP2A,TGFB1,TGFBR2,VIM,WNT5B,WNT7A,WNT7B			GO: Biological Process
GO: Biological Process	GO:1901701	cellular response to oxygen-containing compound	10	AACS,AANAT,ABCA1,ABCB4,ADAMTS1,ADCY1,ADCY2,ADCY3,ADCY4,ADCY6,ADCY8,ADCY9,ADD1,ADNP2,ADPRHL2,ADRM1,AGT,AGTR2,AGTRAP,AHCYL1,AHSG,AICDA,AIFM1,AKAP1,AKAP6,AKAP8,AKAP9,AKR1C3,AKT1,AKT2,AKT3,ALDH1A2,ALDOB,ANXA5,APEX1,APLP1,APOBEC1,APPL1,AQP1,AQP4,AQP8,ASS1,ATP2B1,ATP6V0A4,ATP6V0B,ATP6V0C,ATP6V0D1,ATP6V0E1,ATP6V1C1,ATP6V1D,ATP6V1F,ATP6V1G3,ATP7A,AVPR1A,BAD,BAIAP2L1,BCAR1,BCL2L1,BIRC5,BMP4,BMP6,BMP7,BNIP…			Pathway	1144995	Sphingolipid signaling pathway	5.75122	ABCC1,ACER1,ASAH1,BCL2,BDKRB2,BID,CERS1,CERS2,CERS4,CERS5,CERS6,CTSD,DEGS1,DEGS2,FCER1A,FCER1G,FYN,GNA12,GNAI1,GNAI2,GNAI3,GNAQ,HRAS,KRAS,MAP2K2,MAPK1,MAPK11,MAPK12,MAPK13,MAPK14,MAPK3,MAPK8,MAPK9,NFKB1,NOS3,OPRD1,PIK3CA,PIK3R1,PIK3R2,PIK3R3,PLCB1,PLCB2,PLCB4,PPP2CB,PPP2R1A,PPP2R1B,PPP2R2A,PPP2R2B,PPP2R2C,PPP2R3C,PPP2R5B,PPP2R5C,PPP2R5D,PPP2R5E,PRKCA,PRKCE,PRKCG,PTEN,RAC2,RAC3,RHOA,ROCK2,SGMS1,SG…			GO: Biological Process	GO:1901698	response to nitrogen compound	10	ABCC2,ABCC8,ACTN2,ADCY1,ADCY4,ADCY6,ADCY8,ADGRL3,ADIPOQ,ADM,ADORA2A,ADRA1B,ADRM1,ADSS,AGO2,AGO4,AGT,AGTR1,AGTR2,AGXT,AHCYL1,AHSG,AIFM1,AKAP1,AKAP5,AKAP9,AKT1,AKT2,AKT3,ANKRD26,ANXA5,APEX1,APOBEC1,APP,APPL1,APRT,AQP1,AQP8,ARHGEF2,ASPH,ASS1,ATP1A2,ATP2A1,ATP2A2,ATP4B,ATP6V0A4,ATP6V0D1,ATP6V0D2,ATP6V0E1,ATP6V1F,ATP6V1H,AVPR2,BAD,BAIAP2,BAIAP2L1,BAIAP2L2,BCDIN3D,BCHE,BMP7,BSG,C2CD5,CALM1,CALM3,CAMK2A…			GO: Biological Process	GO:0018193	peptidyl-amino acid modification	10	AAAS,ABI3,ACE,ACVR1,ACVR1B,ADH5,ADIPOQ,ADNP,ADORA1,AGT,AGTPBP1,AGTR1,AHSG,AKAP9,AKT1,AKT3,ALK,ANGPT4,APBB1,APLP2,APOA2,ARHGEF2,ARID4A,ARL2BP,ARRB1,ASH1L,ASPH,ASPHD2,ATG7,ATP13A2,ATP2B4,ATR,AXL,AZU1,BAG4,BAK1,BAX,BAZ1B,BAZ2A,BCAR3,BCL11A,BDNF,BGN,BLK,BLM,BMI1,BMP7,BRAF,BRCA2,BRD1,BRD7,BRPF1,BRPF3,BRSK2,CALM1,CALM2,CAMK2A,CAMK2D,CAMK4,CAMKMT,CAPN3,CAPRIN2,CARM1,CBLC,CBX4,CBX8,CCK,CCL5,CD3E,CD40,CD8…			GO: Biological Process	GO:0001501	skeletal system development	5.41333	ACD,ACP5,ACVRL1,ADAMTS7,AHSG,ALPL,ALX4,ANKH,ANKRD11,ARID5A,BCAN,BGLAP,BMP1,BMP10,BMPR1A,CACNA1S,CARM1,CCN1,CDX1,CHD7,CHST11,CHSY1,CLEC3B,COL19A1,COL9A1,COL9A2,COMP,CTC1,CTNNB1,DEAF1,DHRS3,DICER1,DLX1,DSPP,EDN1,EIF4A3,ESR1,ESRRA,EXT1,EYA1,FAT4,FGFR2,FGFRL1,FOXP1,FRZB,FUZ,GDF2,GDF3,GH1,GJA5,GLI2,GNA11,GSC,HAPLN2,HAS2,HOXA11,HOXA13,HOXA2,HOXA6,HOXB1,HOXB2,HOXB5,HOXB7,HOXB8,HOXC10,HOXC5,HOXC8,HOXD11,…			GO: Biological Process	GO:0007267	cell-cell signaling	5.95854	ABAT,ABHD6,ACHE,ACVR1C,ACVR2A,ADGRE5,ADRA1A,ADRA1D,ADRB3,AGTR1,AKAP9,ALS2,ANAPC2,ANXA9,APBA1,APOE,AQP1,ARHGEF7,ARL2,ARRB1,ARRB2,ASIC1,ASIC2,ATP2A2,BAD,BAIAP3,BARX1,BGLAP,BMP3,BMP6,BRAF,BST2,BTK,C1QTNF1,CA7,CACNA1A,CACNA1B,CACNA1G,CACNB3,CACNG3,CACNG4,CACNG7,CALB1,CALCA,CAMK2A,CAMK2B,CBLN1,CCKBR,CCL16,CCL2,CCL20,CCL22,CCL24,CCL4,CCL8,CCN6,CCR1,CD34,CD38,CD70,CD86,CDK16,CEL,CELF4,CELSR1,CGA,CHD7,CH…			GO: Biological Process	GO:0072511	divalent inorganic cation transport	5.96471	ADCYAP1R1,ADRA1A,AHNAK,AKAP5,AKAP6,AQP2,ASPH,ATP2A1,ATP2A2,ATP2A3,ATP2B3,ATP2C1,ATP2C2,BBC3,BDKRB1,BEST1,BMP4,CACFD1,CACNA1A,CACNA1C,CACNA1F,CACNA1H,CACNA1I,CACNA1S,CACNA2D1,CACNB1,CACNB2,CACNB3,CACNG7,CALCA,CALM3,CAMK2A,CAMK2B,CAMK2D,CAMK2G,CAPN3,CASK,CASQ1,CASQ2,CATSPER3,CBARP,CBLIF,CCL19,CCL2,CCL21,CCL3,CCL4,CCL5,CCL8,CCR7,CD19,CD4,CD84,CDK5,CEMIP,CHRNA10,CHRNA4,CHRNA7,CHRNB2,CLCA1,CLDN16,CLEC…			GO: Biological Process
GO: Biological Process	GO:2000058	regulation of ubiquitin-dependent protein catabolic process	10	ANAPC10,ANAPC15,ANAPC16,ANAPC2,ANAPC7,ANKS1A,AXIN1,BTRC,BUB1B,BUB3,CAV3,CCDC22,CDC16,CDC26,CDC27,CDK1,CDK5RAP3,CDKN2A,CUL1,FBXO5,FZR1,HFE,PDCL3,PLK1,PSEN2,PSMA1,PSMA2,PSMA4,PSMA5,PSMA6,PSMA7,PSMB1,PSMB10,PSMB2,PSMB3,PSMB5,PSMB6,PSMB7,PSMC2,PSMC3,PSMC4,PSMD11,PSMD13,PSMD14,PSMD3,PSMD7,PSMD9,PSME1,PSME2,PSME4,PSMF1,PTEN,PTK2,PTK2B,SKP1,SMURF1,UBA52,UBC,UBE2D1,UBE2E1,WNT1			Pathway	132956	Metabolic pathways	3.97884	A4GALT,AASS,ABAT,ACAA1,ACACA,ACACB,ACADL,ACADM,ACAT1,ACAT2,ACER1,ACO1,ACOT2,ACOT8,ACOX1,ACP2,ACP5,ACSBG2,ACSL1,ACSL3,ACSL5,ACSL6,ACSS1,ACSS2,ACY1,ADAM29,ADH4,ADH5,ADH6,ADK,ADSL,AFMID,AGL,AGMAT,AGPAT2,AGPAT3,AGPS,AGXT,AHCY,AHCYL2,AK1,AK2,AK5,AK8,AK9,AKR1A1,AKR1D1,ALAD,ALAS2,ALDH1A1,ALDH1A2,ALDH2,ALDH3A2,ALDH4A1,ALDH6A1,ALDH7A1,ALDH9A1,ALDOB,ALG12,ALG13,ALG14,ALG2,ALOX12,ALOX12B,ALOX15B,ALPL,ALPP,A…			GO: Biological Process	GO:0003015	heart process	10	ACE,ACE2,ADM,ADRA1A,ADRA1B,ADRA1D,AGT,AGTR2,AHCYL1,AKAP9,APLN,ASPH,ATG5,ATP1A2,ATP1B1,ATP1B2,ATP2A1,ATP2A2,ATP2A3,ATP2B1,ATP2B2,ATP2B3,BMP10,CACNA1D,CACNA1E,CACNA1F,CACNA1G,CACNA1H,CACNA1S,CACNA2D1,CACNA2D2,CACNA2D4,CACNB1,CACNB3,CACNG1,CACNG3,CACNG4,CACNG6,CACNG7,CALM1,CALM3,CELF2,CHGA,CHRM2,CLIC2,CORIN,CTNNA3,DMPK,DNM1L,DRD2,EDN1,EDN3,EPAS1,FGF12,FOXN4,FXYD4,FXYD6,FXYD7,GJC1,GLP1R,GNAO1,GPD1L,G…			GO: Biological Process	GO:0051241	negative regulation of multicellular organismal process	10	ABAT,ABCG5,ABR,ACP5,ADAMTS18,ADGRB3,ADGRG1,ADIPOQ,ADORA1,ADORA2B,ADRB3,AGT,AHSG,AKAP1,ALOX12,AMOT,ANGPT2,ANGPT4,ANKRD26,ANPEP,ANXA1,APBB1,APC,APLN,APOA2,APOC1,APOC2,APOD,AQP4,ARF6,ARHGEF2,ARRB1,ASAP1,ASB1,ASCL1,ASPM,ASPN,ATP2A1,ATP2B4,AVPR1A,AVPR2,AXIN2,AXL,BANK1,BCL11A,BCL3,BDNF,BMP4,BMP7,BMPR2,BRCA2,BTN1A1,C1QBP,C1QC,C1QTNF3,C5orf30,CALCA,CALCR,CALCRL,CALR,CAPN3,CARM1,CASZ1,CAV3,CCL13,CCL21,CCL…			GO: Biological Process	GO:0007010	cytoskeleton organization	5.32018	ABI2,ABLIM2,ACTC1,ACTN4,ACTR3B,AGAP2,AK7,AKAP2,ALOX15,AMOT,ANG,ANKRD23,AP1G1,APC,APOE,ARAP3,ARHGAP6,ARHGEF18,ARHGEF19,ARHGEF2,ARL2,ARMC4,ARPC1A,ASAP3,ATXN3,ATXN7,AUNIP,AURKA,AURKB,AURKC,BAG4,BAIAP2L2,BCL6,BCR,BECN1,BFSP2,BICD1,BIRC2,BIRC3,BIRC5,BMP10,BRSK2,CAMSAP1,CAP2,CAPN3,CARMIL1,CASP4,CC2D2A,CCDC114,CCDC155,CCDC40,CCKAR,CCNB1,CCNF,CDC14A,CDC42EP1,CDC42EP2,CDK5R1,CDKN1B,CENPA,CEP57,CEP57L1,CEP…			GO: Biological Process	GO:0051674	localization of cell	5.93575	ABCC1,ABHD6,ABI2,ABI3,ABL1,ACE,ACP5,ACTN4,ACVR1C,ADAM9,ADARB1,AGTR1,AKT2,ALOX15B,ALX1,AMOTL1,ANG,ANGPT1,ANGPT2,ANGPT4,ANXA3,AOC3,APEX1,APOD,APOE,AQP1,ARAP3,ARHGAP18,ARHGAP4,ARHGDIB,ARHGEF7,ARRB2,ARSB,ARX,ASCL1,ATP1B1,ATP1B3,ATP2B4,AVL9,AZU1,BBS4,BCAS3,BCR,BMP5,BMPR2,BRAF,BRK1,BST2,BTG1,BVES,C16orf45,C1QBP,C3AR1,C5,CACNA1I,CALCA,CALR,CAP1,CAPN7,CARMIL1,CATSPER3,CATSPERD,CCBE1,CCK,CCL11,CCL16,CCL2,…			GO: Biological Process	GO:0003013	circulatory system process	5.95915	ABAT,ACTA2,ACVRL1,ADAMTS16,ADIPOQ,ADM2,ADORA2B,ADRA1A,ADRA1B,ADRA1D,ADRB3,AGTR2,AGTRAP,AKAP6,ALOX12,AMOT,APLN,APOE,AR,ARHGAP35,ASIC2,ASPH,ATP1B2,ATP2A1,ATP2A2,ATP2A3,ATP2B3,AVPR1B,AVPR2,BCR,BDKRB1,BDKRB2,CACNA1C,CACNA1F,CACNA1H,CACNA1S,CACNA2D1,CACNB1,CACNB2,CACNB3,CACNG7,CALCA,CALM3,CAMK2D,CASQ1,CASQ2,CBS,CCL4,CDC42,CFTR,CHGA,CHRM2,CHRM3,CHRNA7,CLIC2,CMA1,CNR1,COL1A2,CORIN,CPA3,CPS1,CRHR2,CTNNA3…			GO: Biological Process
[truncated: 342 more rows]
[truncated: 17 more columns]

## Sheet: Supp. Table S4
Supplementary Table S4. Count of validated and predicted targets of the 10 analyzed miRNAs.
miRNA	Validated targets	Predicted targets	Validated but not predicted targets	Validated and predicted targets	Predicted but not validated targets
miR-1	110	896	54	56	840
miR-7	55	566	37	18	556
miR-9	106	1388	51	55	1333
miR-124	133	2211	58	75	2137
miR-128	53	1225	27	26	1199
miR-132	37	474	16	21	453
miR-133a	57	975	32	25	950
miR-142	15	950	8	7	943
miR-148b	26	802	14	12	790
miR-181a	107	1371	57	50	1322
Total	699	10858	354	345	10523

## Sheet: Supp. Table S5
Supplementary Table S5. List of predicted and not predicted targets among miRNA validated interactions.
Validated Targets
miR-1		miR-7		miR-9		miR-124		miR-128		miR-132		miR-133a		miR-142		miR-148b		miR-181a
Predicted by TargetScan	Non-predicted by TargetScan	Predicted by TargetScan	Non-predicted by TargetScan	Predicted by TargetScan	Non-predicted by TargetScan	Predicted by TargetScan	Non-predicted by TargetScan	Predicted by TargetScan	Non-predicted by TargetScan	Predicted by TargetScan	Non-predicted by TargetScan	Predicted by TargetScan	Non-predicted by TargetScan	Predicted by TargetScan	Non-predicted by TargetScan	Predicted by TargetScan	Non-predicted by TargetScan	Predicted by TargetScan	Non-predicted by TargetScan
[truncated: 76 more rows]
